# Supplementary material for: Evolutionary dynamics of transposable elements in bdelloid rotifers
Source: eLife journal article supplement (doi:10.7554/elife.63194), 2021-02-05
Supplement: supp [file elife-63194-supp-v1.zip]

a

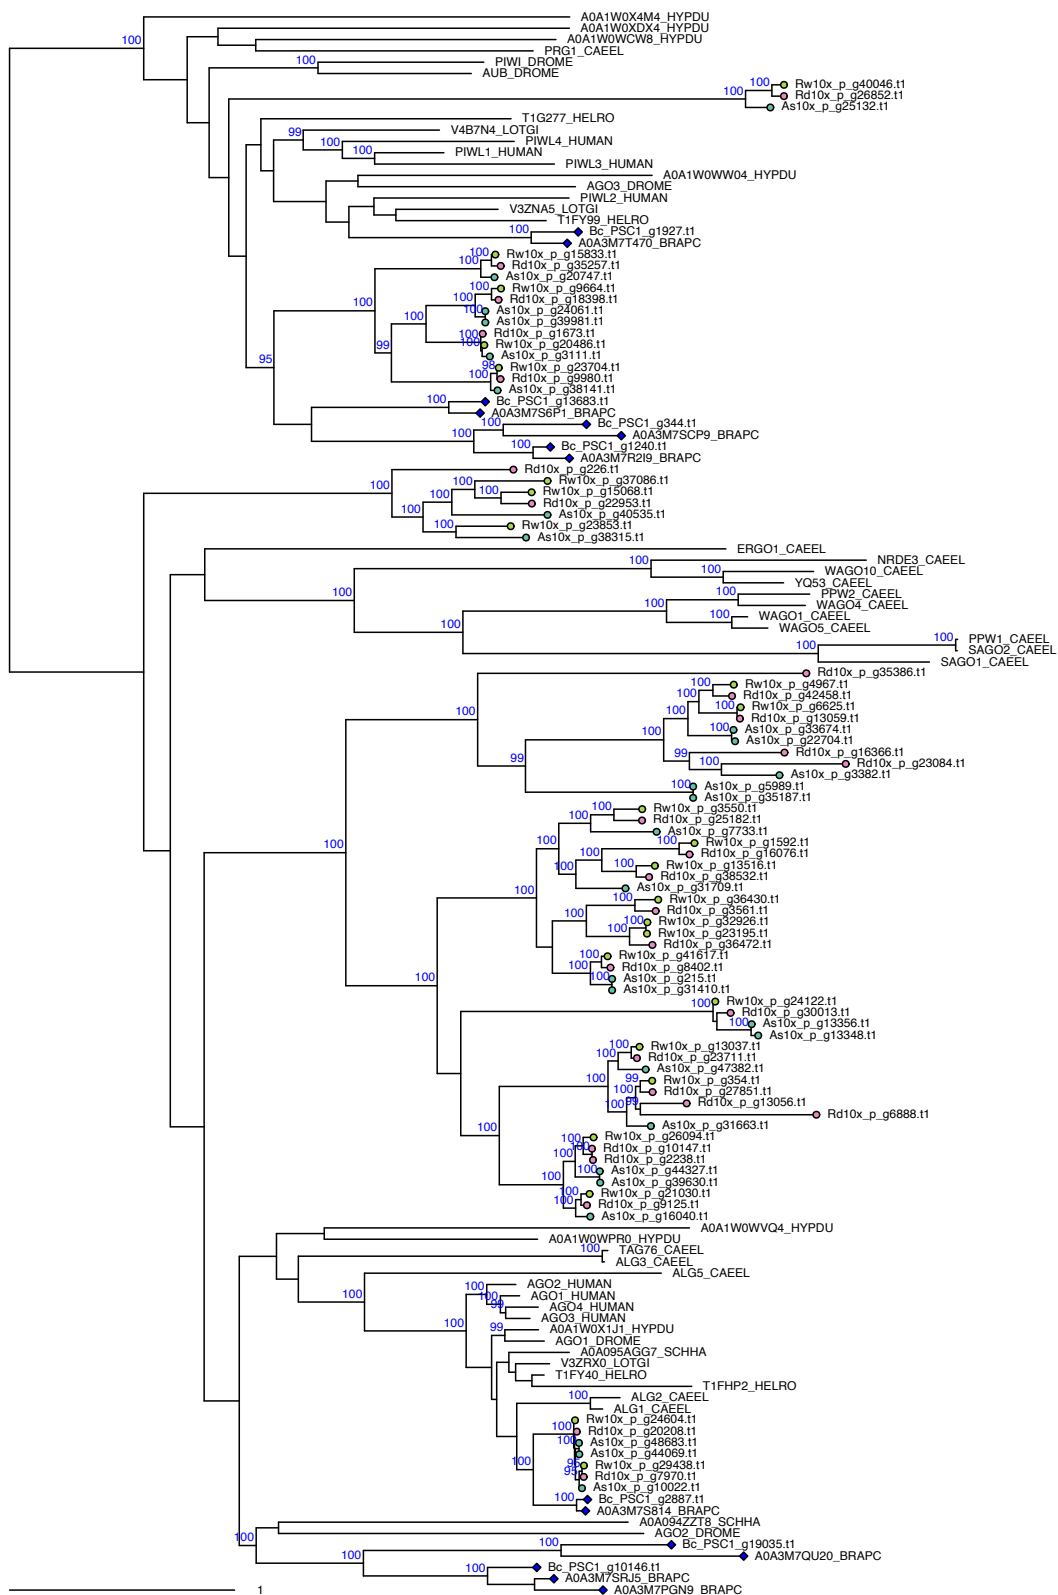

**b**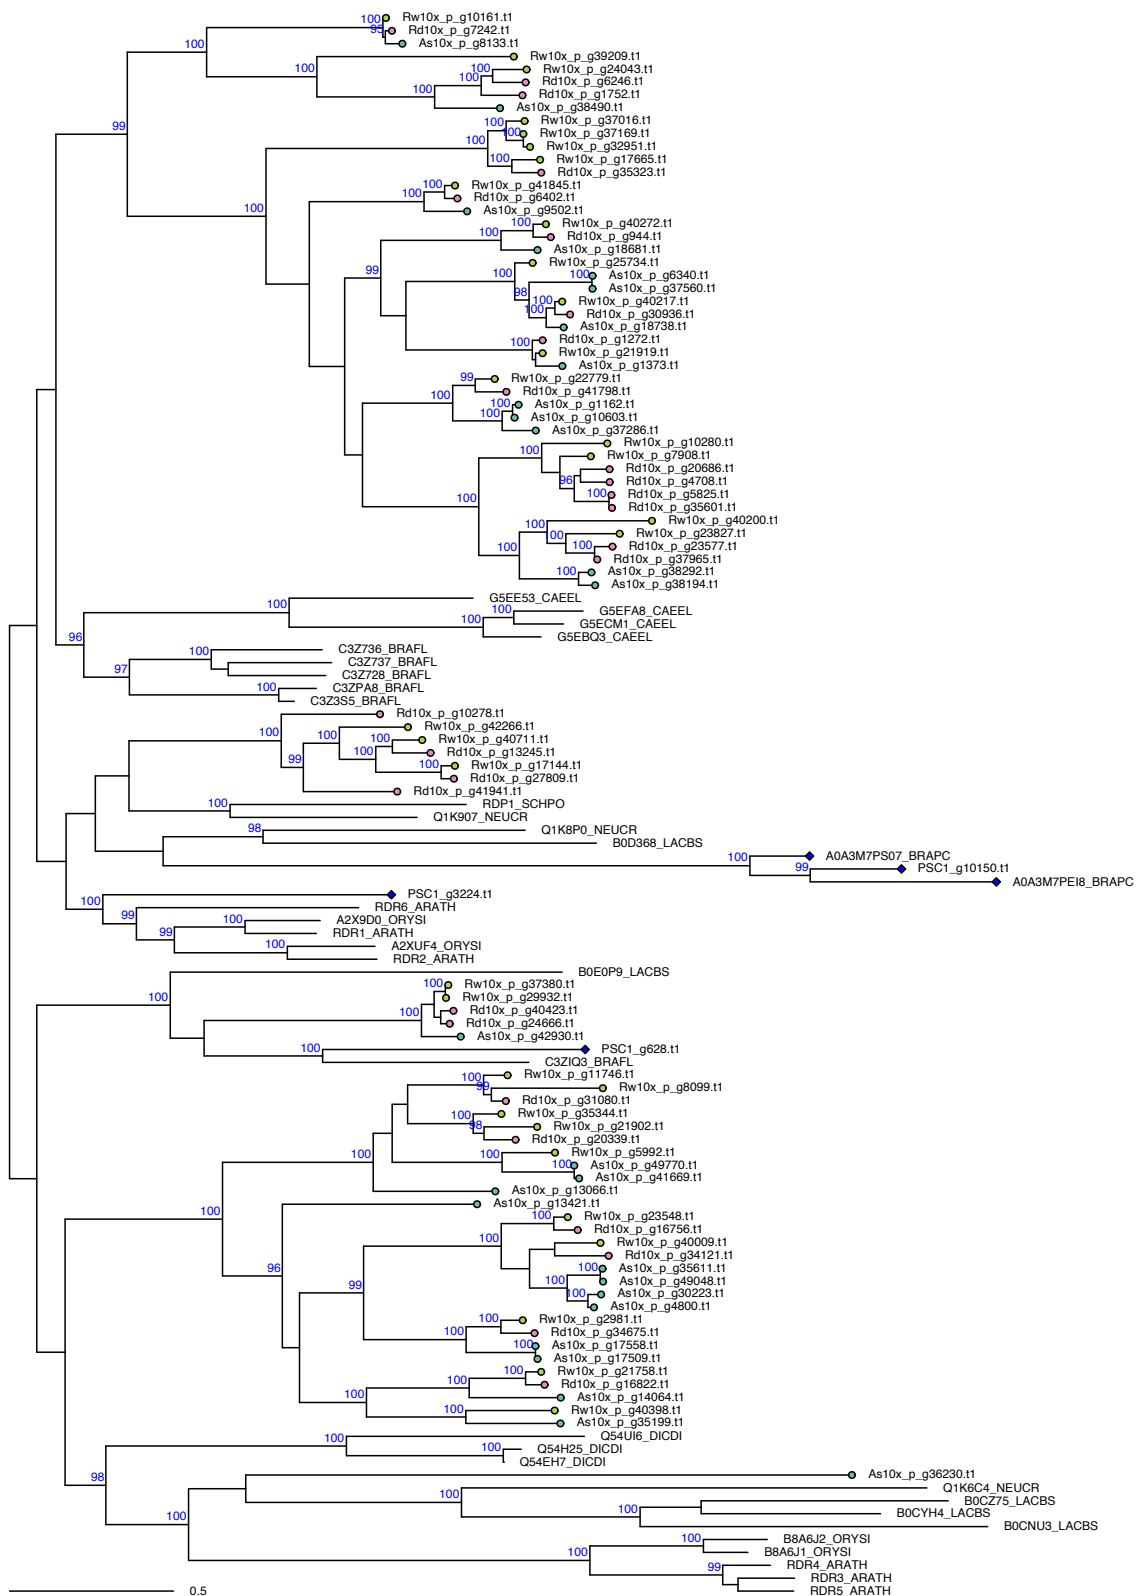

Phylogenetic tree showing the relationships between various Dicer proteins. The tree is rooted at the bottom left with a scale bar of 1. Bootstrap values are indicated at the nodes. The proteins are labeled on the right side of the tree.

Proteins shown (from top to bottom):

- Rw10x\_p\_g23660.t1
- Rd10x\_p\_g36320.t1
- Rd10x\_p\_g38294.t1
- As10x\_p\_g34890.t1
- Rd10x\_p\_g25887.t1
- As10x\_p\_g44609.t1
- As10x\_p\_g47797.t1
- Rw10x\_p\_g22489.t1
- Rd10x\_p\_g16348.t1
- As10x\_p\_g39884.t1
- A0A1W0XDQ7\_HYPDU
- A1ZAW0\_DROME
- PSC1\_g14367.t1
- PSC1\_g14521.t1
- PSC1\_g5327.t1
- A0A3M7SRL6\_BRAPC
- DICER\_HUMAN
- V4BAB4\_LOTGI
- T1EDH4\_HELRO
- A0A094ZUJ5\_SCHHA
- PSC1\_g11529.t1
- Q869Z1\_DICD
- A0A1W0WNV0\_HYPDU
- DCR1\_DROME
- DCR1\_CAEEL
- Rw10x\_p\_g41275.t1
- Rd10x\_p\_g24067.t1
- As10x\_p\_g6841.t1
- PSC1\_g56.t1
- A0A3M7S6C3\_BRAPC
- DCL2\_NEUCR
- DCR1\_SCHPO
- DCL1\_NEUCR
- A2XBW0\_ORYSI
- DCL1\_ARATH
- B8A862\_ORYSI
- B8AL70\_ORYSI
- DCL2\_ARATH
- B8ARP6\_ORYSI
- DCL4\_ARATH
