# Supplementary material for: Evolutionary dynamics of transposable elements in bdelloid rotifers
Source: eLife journal article supplement (doi:10.7554/elife.63194), 2021-02-05
Supplement: supp [file elife-63194-supp-v1.zip]

Archive with 40 entries (40 files):
- elife_poa_e63194_Table_1_source_data_1.xlsx
- elife_poa_e63194_Table_2_source_data_2.xlsx
- elife_poa_e63194_Figure_1_figure_supplement_1.pdf
- elife_poa_e63194_Figure_2_figure_supplement_1.pdf
- elife_poa_e63194_Figure_2_figure_supplement_2.pdf
- elife_poa_e63194_Figure_2_figure_supplement_3.pdf
- elife_poa_e63194_Figure_2_figure_supplement_4.pdf
- elife_poa_e63194_Figure_2_figure_supplement_5.pdf
- elife_poa_e63194_Figure_2_source_data_1.xlsx
- elife_poa_e63194_Figure_2_source_data_3.zip
- elife_poa_e63194_Figure_2_source_data_4.xlsx
- elife_poa_e63194_Figure_2_source_data_5.docx
- elife_poa_e63194_Figure_2_source_data_6.docx
- elife_poa_e63194_Figure_3_figure_supplement_1.pdf
- elife_poa_e63194_Figure_3_figure_supplement_2.pdf
- elife_poa_e63194_Figure_3_figure_supplement_3.pdf
- elife_poa_e63194_Figure_3_figure_supplement_4.pdf
- elife_poa_e63194_Figure_3_figure_supplement_5.pdf
- elife_poa_e63194_Figure_3_figure_supplement_6.pdf
- elife_poa_e63194_Figure_3_figure_supplement_7.pdf
- elife_poa_e63194_Figure_3_source_data_1.xlsx
- elife_poa_e63194_Figure_4_figure_supplement_1.pdf
- elife_poa_e63194_Figure_4_figure_supplement_2.pdf
- elife_poa_e63194_Figure_4_source_data_1.zip
- elife_poa_e63194_Figure_4_source_data_2.docx
- elife_poa_e63194_Figure_5_figure_supplement_1.pdf
- elife_poa_e63194_Figure_5_source_data_1.zip
- elife_poa_e63194_Figure_5_source_data_2.docx
- elife_poa_e63194_Figure_5_source_data_3.docx
- elife_poa_e63194_Figure_5_source_data_4.docx
- elife_poa_e63194_Figure_6_figure_supplement_1.pdf
- elife_poa_e63194_Figure_6_source_data_1.zip
- elife_poa_e63194_Figure_6_source_data_2.docx
- elife_poa_e63194_Figure_7_figure_supplement_1.pdf
- elife_poa_e63194_Figure_7_figure_supplement_2.pdf
- elife_poa_e63194_Figure_7_source_data_1.xlsx
- elife_poa_e63194_Figure_7_source_data_2.zip
- elife_poa_e63194_Figure_8_source_data_1.docx
- elife_poa_e63194_Figure_8_source_data_2.zip
- elife_poa_e63194_Transparent_Reporting_File.docx
