# Supplementary material for: Evolutionary dynamics of transposable elements in bdelloid rotifers
Source: eLife journal article supplement (doi:10.7554/elife.63194), 2021-02-05
Supplement: supp [file elife-63194-supp-v1.zip › elife_poa_e63194_Figure_2_source_data_1.xlsx]

## Sheet: Rotifers.RM_full
ID	Genome.size	Class	Genus	Species	Desiccation	DNA.transposons	Rolling.circles	Penelope	LTRs	LINEs	SINEs	Satellite	Simple	Low.complexity	Unclassified	SUM.known.all	SUM.known.I	SUM.known.II	SUM.TOTAL
Ar_Ar2018	174494180	B	Adineta	Ar	1	1.68952	0.342017	0.43062	0.9832	0.518732	0.0652119	0.0405251	0.752776	0.198376	9.35704	4.0293	1.99776	2.03153	14.378
Ar_ARIC003	172240959	B	Adineta	Ar	1	1.65783	0.403837	0.477378	0.480644	0.407347	0.0700083	0.00253714	0.746878	0.187344	8.6265	3.49705	1.43538	2.06167	13.0603
As_10x_m	231071434	B	Adineta	Ar	1	1.24464	0.334776	0.297103	0.814509	0.484967	0.0015242	0.0899925	1.82259	0.44408	19.6559	3.17752	1.5981	1.57941	25.1901
As_10x_p	171140834	B	Adineta	As	1	1.20688	0.35224	0.387237	0.501211	0.494261	0.00167873	0.00525766	1.8337	0.451173	16.1874	2.94351	1.38439	1.55912	21.421
As_ASTE804	163706511	B	Adineta	As	1	1.23579	0.206809	0.463044	0.278769	0.316687	0.00204818	0.00304997	2.05418	0.436798	15.5252	2.50314	1.06055	1.4426	20.5224
As_ASTE805	166602683	B	Adineta	As	1	1.18438	0.32739	0.438177	0.713799	0.348914	0.00186312	0.00304617	1.78256	0.426407	16.969	3.01453	1.50275	1.51177	22.1955
As_ASTE806	163826361	B	Adineta	As	1	1.21751	0.225133	0.369264	0.275625	0.346333	0.00249166	0.00347746	1.86919	0.437079	15.3314	2.43635	0.993713	1.44264	20.0775
Av_Av2013	217933776	B	Adineta	Av	1	2.10467	0.658015	0.966739	0.737527	0.480242	0.00155414	0.0378083	1.37118	0.318722	12.8477	4.94874	2.18606	2.76268	19.5241
Ba_OHJ22	114426057	M	Brachionus	Ba	0	3.11583	0.297229	0.0961022	1.86028	4.83858	0.00267946	0.00513257	1.81248	0.91948	24.2663	10.2107	6.79764	3.41305	37.2141
Ba_OHJ82	114845438	M	Brachionus	Ba	0	2.65006	0.249757	0.0754771	1.81444	4.71493	0.00575208	0.00462796	1.7945	0.913261	24.7753	9.51042	6.6106	2.89982	36.9981
Bc_PSC1	116732113	M	Brachionus	Bc	0	2.89396	0.18121	0.176683	1.44295	2.15467	0.00169619	0.0186864	1.55657	0.761481	26.4498	6.85117	3.776	3.07517	35.6377
Bc_v0.6	129626318	M	Brachionus	Bc	0	3.13284	0.169739	0.407841	2.87946	2.81358	0.0110664	0.0365281	1.37037	0.669554	24.5421	9.41453	6.11195	3.30258	36.033
Bp_HYR1	108498893	M	Brachionus	Bp	0	2.65567	0.190184	0.0423202	1.28976	4.86982	0.00415765	0.00700652	1.68946	0.869006	25.7583	9.05191	6.20606	2.84585	37.3757
Bp_Tokyo1	99476262	M	Brachionus	Bp	0	1.7616	0.169807	0.0857732	0.759688	3.11912	0.00692728	0.00990689	1.87466	0.941635	23.4577	5.90291	3.97151	1.9314	32.1868
Br_Italy2	51058670	M	Brachionus	Br	0	0.492007	0.081661	0.00558965	0.257504	2.40248	0.00568757	0.00594806	2.18112	1.03315	3.40886	3.24493	2.67126	0.573668	9.87401
Bt_SM28	70983965	M	Brachionus	Bt	0	1.92239	0.0754903	0.0545588	0.710163	4.31928	0.0024414	0.00586893	1.95735	1.07447	12.2018	7.08433	5.08645	1.99788	22.3238
Dc_DCAR505	344087970	B	Didymodactylos	Dc	1	2.64936	0.18964	0.723374	0.735349	2.30771	0.0855828	0.049501	0.799551	0.168975	35.2746	6.69101	3.85201	2.839	42.9837
Dc_DCAR706	401585883	B	Didymodactylos	Dc	1	2.57526	0.24809	0.733386	1.13531	2.53504	0.0586435	0.0451263	0.793585	0.166887	37.6994	7.28573	4.46238	2.82335	45.9907
Rc_Rc2018	228307647	B	Rotaria	Rc	0	1.66069	0.194403	0.288003	0.514188	0.676262	0.00194781	0.0271235	0.894761	0.182977	18.2424	3.33549	1.4804	1.85509	22.6828
Rd_10x_m	360569275	B	Rotaria	Rd	1	3.63466	0.746908	0.503079	0.514664	0.491964	0.00108745	0.00787089	2.14509	0.458212	33.7254	5.89236	1.51079	4.38157	42.2289
Rd_10x_p	272525925	B	Rotaria	Rd	1	3.14218	0.451647	0.559914	0.546357	0.500947	0.00107439	0.0190367	2.21259	0.405819	33.7151	5.20212	1.60829	3.59383	41.5547
Rd_RSOR408	273443705	B	Rotaria	Rd	1	3.45369	0.278581	0.544576	0.471235	0.525161	0.000970584	0.0385443	1.70107	0.405374	34.5573	5.27421	1.54194	3.73227	41.9765
Rd_RSOR410	272432486	B	Rotaria	Rd	1	3.43148	0.300389	0.534502	0.371648	0.638257	0.00122159	0.00720178	2.22398	0.401926	33.2865	5.2775	1.54563	3.73187	41.1971
Rd_RSOR504	264237458	B	Rotaria	Rd	1	3.69354	0.246299	0.598749	0.479792	0.496963	0.000892379	0.0314547	2.18261	0.412739	32.922	5.51624	1.5764	3.93984	41.0651
Rg_MAG1	241017618	B	Rotaria	Rg	0	2.75933	0.273283	0.706884	0.785173	0.990194	0.000976692	0.0507618	1.0697	0.220213	25.521	5.51584	2.48323	3.03261	32.3775
Rg_MAG2	261996445	B	Rotaria	Rg	0	2.89914	0.268068	0.751982	0.846656	1.07495	0.00101146	0.0292699	1.05952	0.209261	28.2344	5.84181	2.6746	3.16721	35.3742
Rg_MAG3	258723840	B	Rotaria	Rg	0	2.83627	0.301927	0.825666	0.89276	1.0738	0.00107064	0.0179686	1.02726	0.207883	27.8024	5.93149	2.7933	3.1382	34.987
Rg_Rg2018	180458959	B	Rotaria	Rg	0	2.63815	0.271673	0.785098	1.10623	1.09379	0.00122576	0.0152821	1.12702	0.237647	20.542	5.89618	2.98635	2.90983	27.8181
Rg_RM15	198468309	B	Rotaria	Rg	0	2.8137	0.28847	0.680343	1.30922	1.111	0.00124554	0.0274563	1.13625	0.234956	22.0256	6.20398	3.10181	3.10217	29.6283
Rg_RM9	176550445	B	Rotaria	Rg	0	2.29555	0.208821	0.635899	1.25387	1.02823	0.00239082	0.0124667	1.31296	0.259785	18.0814	5.42477	2.92039	2.50437	25.0914
Rp_RPSE411	308789974	B	Rotaria	Rp	1	3.34827	0.339304	0.601693	0.535192	0.959866	0.00111694	0.0108119	1.70166	0.316914	31.7545	5.78544	2.09787	3.68757	39.5693
Rp_RPSE503	296443115	B	Rotaria	Rp	1	3.70073	0.384527	0.598935	0.538312	1.00767	0.0127087	0.0162163	1.30824	0.301158	31.8005	6.24288	2.15762	4.08526	39.669
Rp_RPSE809	295055522	B	Rotaria	Rp	1	3.63269	0.319965	0.582437	0.717422	1.0114	0.0070302	0.0101018	1.56285	0.317918	31.909	6.27095	2.31829	3.95266	40.0709
Rp_RPSE812	274095585	B	Rotaria	Rp	1	3.59937	0.306456	0.58936	0.550873	0.996691	0.00111129	0.0242116	1.33333	0.3286	29.7286	6.04386	2.13804	3.90582	37.4586
Rs_AK11	174984979	B	Rotaria	Rs	0	2.02731	0.300742	0.670472	0.745793	0.81967	0.00134812	0.0221596	1.22825	0.250467	15.911	4.56534	2.23728	2.32805	21.9772
Rs_AK15	151342137	B	Rotaria	Rs	0	1.86904	0.213264	0.669013	0.603682	0.766782	0.00147546	0.01297	1.23744	0.259412	14.1732	4.12326	2.04095	2.08231	19.8063
Rs_AK16	151292988	s	Rotaria	Rs	0	1.83466	0.241842	0.558167	0.73704	0.717596	0.00147793	0.0106819	1.23173	0.258194	14.0224	4.09079	2.01428	2.07651	19.6138
Rs_AK27	174466970	B	Rotaria	Rs	0	2.03853	0.225031	0.672505	0.776207	0.810956	0.00128276	0.0124723	1.23064	0.248784	16.5473	4.52451	2.26095	2.26356	22.5637
Rs_RS1	154580136	B	Rotaria	Rs	0	1.8228	0.161644	0.522338	0.87522	0.773267	0.00133717	0.0484474	1.29616	0.266294	13.3282	4.15661	2.17216	1.98444	19.0958
Rw_10x_m	475793899	B	Rotaria	Rw	1	2.91241	0.467528	0.420631	0.782302	0.549776	0.000829141	0.0199059	1.81148	0.384979	31.3711	5.13348	1.75354	3.37994	38.7209
Rw_10x_p	310426700	B	Rotaria	Rw	1	2.86631	0.621872	0.50616	0.698124	0.602162	0.00883912	0.0100033	1.63221	0.342194	34.3426	5.30347	1.81529	3.48818	41.6304
Rw_RSIL801	301934499	B	Rotaria	Rw	1	2.86387	0.223725	0.534118	0.551672	0.623612	0.00100831	0.00460537	1.48564	0.358278	29.0018	4.798	1.71041	3.08759	35.6483
Rw_RSIL802	278088189	B	Rotaria	Rw	1	2.59883	0.211636	0.536061	0.366821	0.623053	0.000806172	0.00491039	1.89751	0.363445	27.9362	4.33721	1.52674	2.81046	34.5392
Rw_RSIL804	265824198	B	Rotaria	Rw	1	2.62243	0.261036	0.495023	0.373622	0.583961	0.000680804	0.00810907	2.06085	0.343701	31.2873	4.33675	1.45329	2.88347	38.0367
Rw_RSIL806	275703496	B	Rotaria	Rw	1	2.81733	0.285588	0.55013	0.575168	0.622615	0.00339776	0.089422	1.81933	0.357788	31.0617	4.85423	1.75131	3.10292	38.1825

## Sheet: Rotifers.MITEs
ID	Genome.length	MITE.span	MITE.proportion	intersect.DNA	intersect.DNA.%	intesect.Unclassified	intersect.Unclassified.%	Unclassified.%	prop.Unclassified.as.MITEs
Ar_ARIC003	172240959	90407	0.00052	6398	0.07077	79545	0.87985	8.63	0.00535
As_ASTE804	163706511	87881	0.00054	19476	0.22162	71287	0.81118	15.53	0.0028
As_ASTE805	166602683	77426	0.00046	14720	0.19012	59136	0.76377	16.97	0.00209
As_ASTE806	163826361	76045	0.00046	12834	0.16877	56314	0.74054	15.33	0.00224
Bc_PSC1	116732113	988516	0.00847	35042	0.03545	972414	0.98371	26.45	0.03149
Dc_DCAR505	344087970	860976	0.0025	57485	0.06677	815036	0.94664	35.27	0.00671
Dc_DCAR706	401585883	1408725	0.00351	103396	0.0734	1353698	0.96094	37.7	0.00894
Rd_RSOR408	273443705	313979	0.00115	37238	0.1186	299026	0.95238	34.56	0.00316
Rd_RSOR410	272432486	319669	0.00117	44551	0.13937	305965	0.95713	33.29	0.00337
Rd_RSOR504	264237458	294426	0.00111	48104	0.16338	274745	0.93315	32.92	0.00316
Rg_MAG1	241017618	710596	0.00295	67173	0.09453	671473	0.94494	25.52	0.01092
Rg_MAG2	261996445	684422	0.00261	76371	0.11158	664170	0.97041	28.23	0.00898
Rg_MAG3	258723840	708124	0.00274	72314	0.10212	669610	0.94561	27.8	0.00931
Rg_RM15	198468309	696622	0.00351	79507	0.09126	622091	0.89301	22.03	0.01423
Rg_RM9	176550445	597315	0.00338	63577	0.10644	538949	0.90229	18.08	0.01688
Rp_RPSE411	308789974	449948	0.00146	41769	0.09283	431960	0.96002	31.75	0.00441
Rp_RPSE503	296443115	435151	0.00147	45799	0.10525	421012	0.96751	31.8	0.00447
Rp_RPSE809	295055522	313540	0.00106	22207	0.07083	303027	0.96647	31.91	0.00322
Rp_RPSE812	274095585	295633	0.00108	37835	0.12798	283915	0.96036	29.73	0.00348
Rs_AK11	174984979	332267	0.0019	33638	0.10124	318001	0.95706	15.91	0.01142
Rs_AK15	151342137	319046	0.00211	19775	0.06198	301932	0.94636	14.17	0.01408
Rs_AK16	151292988	331959	0.00219	23657	0.07126	295011	0.8887	14.02	0.01391
Rs_AK27	174466970	313262	0.0018	24847	0.07932	300810	0.96025	16.55	0.01042
Rs_RS1	154580136	348972	0.00226	22151	0.06348	316085	0.90576	13.33	0.01534
Rw_RSIL801	301934499	350958	0.00116	26937	0.07675	331014	0.94317	29	0.00378
Rw_RSIL802	278088189	359679	0.00129	20681	0.0575	335683	0.93328	27.94	0.00432
Rw_RSIL804	265824198	397080	0.00149	30401	0.07656	385235	0.97017	31.29	0.00463
Rw_RSIL806	275703496	454709	0.00165	42038	0.09245	434396	0.95533	31.06	0.00507

## Sheet: Rotifers.Unclassified
ID	Unclassified	intersect.CDS	intersect.CDS.%	intesect.MITEs	intersect.MITEs.%
Ar_ARIC003	14923159	3222490	0.215939	79545	0.00533031
As_ASTE804	25415780	6556241	0.257959	71287	0.00280483
As_ASTE805	28270785	6159945	0.217891	59136	0.00209177
As_ASTE806	25116876	6108669	0.24321	56314	0.00224208
Dc_DCAR505	121375698	32716131	0.269544	815036	0.00671499
Dc_DCAR706	151395525	34074773	0.225071	1353698	0.00894147
Rd_RSOR408	94494756	22885264	0.242186	299026	0.00316447
Rd_RSOR410	90683135	23679825	0.261127	305965	0.003374
Rd_RSOR504	86992350	21451120	0.246586	274745	0.00315827
Rg_MAG1	61510082	4930447	0.0801567	671473	0.0109165
Rg_MAG2	74011688	4884208	0.0659924	664170	0.00897385
Rg_MAG3	71931409	4939084	0.0686638	669610	0.00930901
Rg_RM15	43713865	4889105	0.111843	622091	0.014231
Rg_RM9	31922854	4453947	0.139522	538949	0.0168829
Rp_RPSE411	98054788	16762297	0.170948	431960	0.00440529
Rp_RPSE503	94270282	15618769	0.165681	421012	0.00446601
Rp_RPSE809	94149392	13714121	0.145663	303027	0.00321858
Rp_RPSE812	81484668	13108065	0.160865	283915	0.00348428
Rs_AK11	27866366	2620519	0.0940388	318001	0.0114116
Rs_AK15	21450003	3093558	0.144222	301932	0.0140761
Rs_AK16	21267694	3233122	0.15202	295011	0.0138713
Rs_AK27	28881349	2824905	0.0978107	300810	0.0104154
Rs_RS1	20602817	2880510	0.139811	316085	0.0153418
Rw_RSIL801	80650451	11690895	0.144958	331014	0.0041043
Rw_RSIL802	74261107	10564077	0.142256	335683	0.00452031
Rw_RSIL804	86260161	9562945	0.110862	385235	0.00446597
Rw_RSIL806	93786040	14925462	0.159144	434396	0.00463178

## Sheet: Protostomes
REPEAT	DMEL	PNUB	PVAN	CELE	HEXE	RVAR	PLAE	CGIG	LGIG	OBIM	ACAL	BGLA	LANA	HROB	CTEL	SHAE	ILIN
DNA.transposons	1.99389	1.13935	0.203725	10.6362	1.3202	3.26522	1.27891	9.10007	2.32171	5.63108	4.65312	5.07961	2.35859	4.74588	4.64753	0.671519	7.97071
Rolling.circles	0.8236	0.098115	0.220059	2.25664	0.276637	0.0975077	0.022803	5.72662	0.131139	0.547177	0.0890264	0.0567369	0.0911964	0.178199	0.0274388	0.00692668	0.00519673
Penelope	0.0201307	0.152832	0.0139679	0.00463971	0.0146436	0.000607218	9.89221	0.3623	1.03527	1.81232	0.117794	0.0611991	0.0961508	1.18427	0.044839	2.67723	0.00222339
LTRs	12.164	0.416068	0.1806	0.631426	0.864603	0.23025	3.31664	2.2332	2.13619	1.78116	1.20375	3.42516	1.87454	2.12679	3.51924	5.44382	1.31371
LINEs	5.28158	0.344234	0.176694	0.565279	0.321993	0.711464	33.8915	2.0109	0.84234	8.25575	5.68326	12.7632	1.32679	11.3791	5.51515	15.463	0.0216186
SINEs	0.0028283	0.00195039	0.000953803	0.0978717	0.000473333	0.000360032	0.0928275	0.0456999	1.23833	5.88539	0.640679	1.83324	0.0128084	0.00395197	0.0106603	0.00115272	0.00125231
Satellite	1.31555	0.0297936	0.014563	1.02863	0.0119716	0.000943964	0.0241437	0.0301446	0.0143731	0.0188867	0.0881907	0.0161874	0.0449991	0.0379482	0.0103324	0.0013714	0.00473523
Simple	2.18316	3.38713	1.36895	1.00443	6.86553	0.214135	1.6335	0.792334	0.675458	6.42798	4.58255	2.66949	1.69296	10.5504	1.33821	0.952775	1.77569
Low.complexity	0.325643	1.06655	0.645242	0.278092	0.223219	0.0289011	0.322905	0.125988	0.104111	0.397712	0.460141	0.414394	0.220435	0.64204	0.16626	0.0968781	0.562629
Unclassified	0.660482	4.6339	8.09356	5.00405	19.6561	12.9438	16.1115	18.0025	18.4171	28.7373	26.3918	25.2426	17.1443	14.8217	18.3954	24.067	30.1892
SUM.I	17.4685	0.915084	0.372215	1.29922	1.20171	0.942682	47.1932	4.6521	5.25213	17.7346	7.64548	18.0828	3.31029	14.6941	9.08989	23.5852	1.33881
SUM.II	2.81749	1.23746	0.423784	12.8929	1.59684	3.36273	1.30171	14.8267	2.45285	6.17825	4.74214	5.13635	2.44979	4.92408	4.67497	0.678446	7.97591
SUM.known	20.286	2.15255	0.796	14.1921	2.79855	4.30541	48.4949	19.4788	7.70498	23.9129	12.3876	23.2191	5.76008	19.6182	13.7649	24.2636	9.31472
SUM.total	24.7709	11.2699	10.9183	21.5073	29.5553	17.4931	66.587	38.4297	26.916	59.4948	43.9103	51.5617	24.8628	45.6703	33.6751	49.3816	41.847
