# Supplementary material for: Evolutionary dynamics of transposable elements in bdelloid rotifers
Source: eLife journal article supplement (doi:10.7554/elife.63194), 2021-02-05
Supplement: supp [file elife-63194-supp-v1.zip › elife_poa_e63194_Figure_2_source_data_4.xlsx]

## Sheet: Sheet1
Species	Phyla	Genome size	Assembly level	N50	Genome BUSCO	GenBank Accession	Reference
Drosophila melanogaster	Arthropoda	143.7 Mb	Chromosome	21.5 Mb	C:99.7%[S:97.7%,D:2.0%],F:0.0%	GCF_000001215.4	Adams MD, Celniker SE, Holt RA, Evans CA, Gocayne JD, Amanatides PG, et al. The genome sequence of Drosophila melanogaster. Science. 2000;287: 2185–2195. doi:10.1126/science.287.5461.2185
Polypedilum nubifer	Arthropoda	115.7 Mb	Scaffold	25.9 kb	C:97.0%[S:95.7%,D:1.3%],F:1.0%	PRJDB2914	Gusev O, Suetsugu Y, Cornette R, Kawashima T, Logacheva MD, Kondrashov AS, et al. Comparative genome sequencing reveals genomic signature of extreme desiccation tolerance in the anhydrobiotic midge. Nat Commun. 2014;5: 4784. doi:10.1038/ncomms5784
P. vanderplanki	Arthropoda	127.4 Mb	Scaffold	228.6 kb	C:97.3%[S:94.7%,D:2.6%],F:1.7%	PRJDB1558	Gusev O, Suetsugu Y, Cornette R, Kawashima T, Logacheva MD, Kondrashov AS, et al. Comparative genome sequencing reveals genomic signature of extreme desiccation tolerance in the anhydrobiotic midge. Nat Commun. 2014;5: 4784. doi:10.1038/ncomms5784
Caenorhabditis elegans	Nematoda	100.3 Mb	Complete	17.5 Mb	C:96.4%[S:94.7%,D:1.7%],F:0.0%	GCF_000002985.6	C. elegans Sequencing Consortium. Genome sequence of the nematode C. elegans: a platform for investigating biology. Science. 1998;282: 2012–2018. doi:10.1126/science.282.5396.2012
Hypsibius exemplaris	Tardigrada	104.2 Mb	Scaffold	76.8 kb	C:93.0%[S:91.7%,D:1.3%],F:1.7%	GCA_002082055.1	Hashimoto T, Horikawa DD, Saito Y, Kuwahara H, Kozuka-Hata H, Shin-I T, et al. Extremotolerant tardigrade genome and improved radiotolerance of human cultured cells by tardigrade-unique protein. Nat Commun. 2016;7: 12808. doi:10.1038/ncomms12808
Ramazzottius varieornatus	Tardigrada	55.8 Mb	Scaffold	129.7 kb	C:95.7%[S:94.4%,D:1.3%],F:0.7%	GCA_001949185.1	Yoshida Y, Koutsovoulos G, Laetsch DR, Stevens L, Kumar S, Horikawa DD, et al. Comparative genomics of the tardigrades Hypsibius dujardini and Ramazzottius varieornatus. PLoS Biol. 2017;15: e2002266. doi:10.1371/journal.pbio.2002266
Octopus bimaculoides	Mollusca	2.3 Gb	Scaffold	5.5 kb	C:86.5%[S:85.8%,D:0.7%],F:6.3%	GCF_001194135.1	Albertin CB, Simakov O, Mitros T, Wang ZY, Pungor JR, Edsinger-Gonzales E, et al. The octopus genome and the evolution of cephalopod neural and morphological novelties. Nature. 2015;524: 220–224. doi:10.1038/nature14668
Crassostrea gigas	Mollusca	564.8 Mb	Scaffold	42.3 kb	C:94.1%[S:89.8%,D:4.3%],F:1.7%	GCF_000297895.1	Zhang G, Fang X, Guo X, Li L, Luo R, Xu F, et al. The oyster genome reveals stress adaptation and complexity of shell formation. Nature. 2012;490: 49–54. doi:10.1038/nature11413
Lottia gigantea	Mollusca	359.5 Mb	Scaffold	96.0 kb	C:94.4%[S:92.4%,D:2.0%],F:1.3%	GCF_000327385.1	Simakov O, Marletaz F, Cho S-J, Edsinger-Gonzales E, Havlak P, Hellsten U, et al. Insights into bilaterian evolution from three spiralian genomes. Nature. 2013;493: 526–531. doi:10.1038/nature11696
Aplysia californica	Mollusca	927.3 Mb	Scaffold	9.6 kb	C:92.4%[S:91.7%,D:0.7%],F:1.7%	GCF_000002075.1	Broad Institute 2013; https://www.broadinstitute.org/aplysia/aplysia-genome-project
Biomphalaria glabrata	Mollusca	916.4 Mb	Scaffold	7.3 kb	C:84.5%[S:82.8%,D:1.7%],F:7.9%	GCF_000457365.1	Adema CM, Hillier LW, Jones CS, Loker ES, Knight M, Minx P, et al. Whole genome analysis of a schistosomiasis-transmitting freshwater snail. Nat Commun. 2017;8: 15451. doi:10.1038/ncomms15451
Helobdella robusta	Annelida	235.4 Mb	Scaffold	52.2 kb	C:89.4%[S:88.1%,D:1.3%],F:4.3%	GCF_000326865.1	Simakov O, Marletaz F, Cho S-J, Edsinger-Gonzales E, Havlak P, Hellsten U, et al. Insights into bilaterian evolution from three spiralian genomes. Nature. 2013;493: 526–531. doi:10.1038/nature11696
Capitella teleta	Annelida	333.3 Mb	Scaffold	21.9 kb	C:98.4%[S:94.4%,D:4.0%],F:0.3%	GCA_000328365.1	Simakov O, Marletaz F, Cho S-J, Edsinger-Gonzales E, Havlak P, Hellsten U, et al. Insights into bilaterian evolution from three spiralian genomes. Nature. 2013;493: 526–531. doi:10.1038/nature11696
Lingula anatina	Brachiopoda	406.3 Mb	Scaffold	56.1 kb	C:93.7%[S:68.3%,D:25.4%],F:2.0%	GCF_001039355.1	Luo Y-J, Takeuchi T, Koyanagi R, Yamada L, Kanda M, Khalturina M, et al. The Lingula genome provides insights into brachiopod evolution and the origin of phosphate biomineralization. Nat Commun. 2015;6: 8301. doi:10.1038/ncomms9301
Schistosoma haematobium	Platyhelminthes	376.0 Mb	Scaffold	317.5 kb	C:72.3%[S:71.6%,D:0.7%],F:12.9%	GCF_000699445.1	Young ND, Jex AR, Li B, Liu S, Yang L, Xiong Z, et al. Whole-genome sequence of Schistosoma haematobium. Nat Genet. 2012;44: 221–225. doi:10.1038/ng.1065
Intoshia linei	Orthonectida	41.6 Mb	Scaffold	26.0 kb	C:25.1%[S:24.4%,D:0.7%],F:9.2%	GCA_001642005.1	Mikhailov KV, Slyusarev GS, Nikitin MA, Logacheva MD, Penin AA, Aleoshin VV, et al. The genome of Intoshia linei affirms orthonectids as highly simplified spiralians. Curr Biol. 2016;26: 1768–1774. doi:10.1016/j.cub.2016.05.007
Pomphorhynchus laevis	Rotifera	260.3 Mb	Contig	126.1 kb	C:63.4%[S:57.1%,D:6.3%],F:10.6%	GCA_012934845.1	Mauer, K. et al. The genome, transcriptome, and proteome of the fish parasite Pomphorhynchus laevis (Acanthocephala). PLoS One 15, e0232973 (2020)
