# Supplementary material for: Evolutionary dynamics of transposable elements in bdelloid rotifers
Source: eLife journal article supplement (doi:10.7554/elife.63194), 2021-02-05
Supplement: supp [file elife-63194-supp-v1.zip › elife_poa_e63194_Figure_3_source_data_1.xlsx]

## Sheet: Summary
Superfamily	Ar2018	Av2013	Rd_10x_p	Rg_MAG1	Rs_AK11
DNA	0.363882	0.247452	0.211898	0.0755485	0.123086
LINE	0.602205	0.413094	0.285086	0.101058	0.159026
LTR	0.578802	0.377961	0.262312	0.13035	0.175523
PLE	0.336227	0.237479	0.203897	0.0844391	0.118975
Conservative estimate: proportion of putative TEs, by superfamily, with 100% coverage from mapped RNA-seq data
Superfamily	Ar2018	Av2013	Rd_10x_p	Rg_MAG1	Rs_AK11
DNA	0.596131	0.323026	0.251434	0.17897	0.230255
LINE	0.790537	0.52775	0.369859	0.191793	0.260364
LTR	0.757301	0.501269	0.384808	0.208293	0.252639
PLE	0.545911	0.313704	0.246942	0.179584	0.228089
Less conservative estimate: proportion of putative TEs, by superfamily, with >= 1 bp overlap from >= 2 reads from mapped RNA-seq data

## Sheet: Ar2018
ARIC00001	4646	4725	DNA/TcMar-Tc1#Tc5_cons_Av	21.2	-	0
ARIC00001	4729	4836	DNA/TcMar-Tc1#Tc5_cons_Av	18.9	+	0
ARIC00001	13527	15398	DNA/TcMar-Tc1#rnd-5_family-112	18.9	+	24
ARIC00001	35477	35517	LTR/Gypsy#Gypsy-11_DTa-I	17.1	-	41
ARIC00001	120936	121058	DNA/TcMar-Mariner#rnd-1_family-180	35	-	158
ARIC00001	132195	132262	DNA/hAT#hAT4_Av	29.4	+	0
ARIC00001	143786	143858	DNA/Crypton#Crypton-1_CTe	24.3	+	14
ARIC00001	144930	144974	DNA/Maverick#Polinton-4_PBa	14.3	+	22
ARIC00001	150175	150223	SINE?#rnd-4_family-826	13.4	-	0
ARIC00001	165607	165834	LINE#rnd-5_family-1621	22.4	-	0
ARIC00001	177824	178072	DNA/PIF-ISL2EU#ISL2EU2_Av	33.6	-	10
ARIC00001	181374	181635	LTR/Pao#rnd-5_family-859	24.695	+	89
ARIC00001	198827	200857	DNA/Zator#Zator2_Av	23.8	-	25
ARIC00001	201222	201409	DNA/Zator#Zator1_Av	30.7	-	8
ARIC00001	214341	214383	LTR/Gypsy#Gypsy-5_SI-I	13.9	+	48
ARIC00001	241082	241592	DNA/TcMar-Tc1#Tc21_Av	30	-	2
ARIC00001	241603	241903	DNA/TcMar-Tc1#Tc12_Av	27.147	-	0
ARIC00001	282708	282753	LTR/Pao#ROO_I	8.9	+	52
ARIC00001	310035	310112	LTR/Gypsy#Gypsy37-I_AG	23.1	+	367
ARIC00001	320002	334087	DNA/RC#rnd-6_family-3519	2.5	+	22953
ARIC00001	334932	335015	DNA/RC#rnd-6_family-3519	28.6	+	669
ARIC00001	339082	340052	DNA/RC#rnd-6_family-3519	10.791	+	2298
ARIC00001	344599	345344	DNA/RC#rnd-6_family-3519	7	+	2772
ARIC00001	358253	358367	DNA/RC#rnd-6_family-3519	3.5	-	20
ARIC00001	358456	359127	DNA/RC#rnd-6_family-3519	8.3	+	4470
ARIC00001	359598	360606	DNA/RC#rnd-6_family-3519	5.861	-	392
ARIC00001	378138	378385	DNA/hAT-Ac#rnd-6_family-3575	29.3	+	58
ARIC00001	384846	384946	SINE?#rnd-4_family-826	25.2	+	7148
ARIC00001	390769	390863	DNA/Crypton#Crypton_Av	28.4	+	80
ARIC00001	391496	391565	LTR/Ngaro#rnd-5_family-1935	17.6	+	85
ARIC00001	398655	398726	LTR/Pao#BEL-103_AA-I	21.7	+	14
ARIC00001	410079	410307	DNA/TcMar-Mariner#Avmar11_Av	32.3	+	42
ARIC00001	410308	410367	DNA/TcMar-Sagan#rnd-5_family-746	31.2	+	35
ARIC00001	417882	417999	DNA#DNA3-14_CGi	26	+	16
ARIC00001	439465	439515	DNA/CMC-EnSpm#CACTA4_Av	16	-	122
ARIC00001	460931	460996	LTR/Pao#BEL-18_DAn-I	15.3	+	271
ARIC00001	481909	481956	LINE/L2#Kiri-13_HMM	16.7	+	145
ARIC00001	491718	491938	SINE?#rnd-5_family-4379	29.1	-	9
ARIC00001	503376	503449	LTR/Gypsy#Gypsy-16_CGi-I	22.2	+	38
ARIC00001	570001	570089	LTR/Pao#BEL-37_AA-I	19.7	+	35
ARIC00001	575028	575084	DNA#DNA2-7_CGi	21.1	-	1
ARIC00001	593210	593274	LINE/CR1#CR1_Ele31	17.5	-	80
ARIC00001	649495	649670	DNA/hAT-Ac#rnd-5_family-475	28.6	+	11
ARIC00001	725312	725385	DNA#DNA2-10_CGi	28.4	+	21
ARIC00001	725340	725430	PLE/Penelope-Athena#AthW1-J-R	22	+	24
ARIC00001	733888	734021	LINE/I-Jockey#TART_DV	25.2	+	121
ARIC00001	772508	772602	DNA/RC#Helitron-N1_PBa	17	+	72
ARIC00001	783333	783391	LTR/Gypsy#Gypsy61-I_AG	25.4	-	251
ARIC00001	787209	787267	LTR/Copia#Copia-20_CQ-I	24.1	+	7
ARIC00001	807855	808029	LTR/Ngaro#rnd-5_family-1935	24.9	+	92
ARIC00001	808603	808886	LTR/Ngaro#rnd-5_family-1935	30.2	+	146
ARIC00001	810841	810889	LTR/Gypsy#rnd-5_family-2148	20.4	-	169
ARIC00001	813076	813154	DNA/Merlin#Merlin1_Av	23.1	+	200
ARIC00001	821589	821644	DNA/CMC-Transib#Transib-7_DBi	19.6	+	8
ARIC00001	838236	838323	DNA/hAT-Ac#rnd-5_family-2953	15.8	+	1
ARIC00001	847987	848054	DNA/MULE-MuDR#MuDR14_Av	14.7	-	390
ARIC00001	848272	848342	DNA/MULE-MuDR#MuDR14_Av	22.5	+	369
ARIC00001	861169	861209	LTR/Gypsy#Gypsy61-I_AG	14.6	-	29
ARIC00001	882963	883021	DNA/TcMar-Tc1#Mariner-18_HSal	28.8	-	249
ARIC00001	882971	883054	DNA/hAT-Tip100#hAT-15_HRo	18.3	-	243
ARIC00001	896506	896764	LTR/Pao#rnd-6_family-1773	29.8	-	72
ARIC00001	909469	909607	DNA/TcMar-Tc1#Tc10_Av	33.8	-	1
ARIC00001	911912	912269	DNA/MULE-MuDR#rnd-5_family-3876	23.6	-	39
ARIC00001	914871	914954	PLE/Penelope-Athena#AthL3	18.3	+	4
ARIC00001	915269	915346	DNA/TcMar-Tigger#Tigger2_Av	20.8	+	0
ARIC00001	939140	939211	LTR/Gypsy#Gypsy9-I_AP	19.7	+	32
ARIC00001	941510	941580	DNA/Kolobok-Hydra#Kolobok-3_Aplcal	16.9	+	2
ARIC00001	965582	993520	DNA/hAT-Ac#rnd-5_family-2953	2.2	+	32026
ARIC00001	1029460	1029533	DNA/hAT-Ac#rnd-5_family-2953	21.6	+	3
ARIC00001	1034515	1034636	PLE/Penelope-Athena#AthL3	17.4	+	182
ARIC00001	1034523	1034676	LINE/I-Jockey#TART_DV	17.1	+	180
ARIC00001	1049062	1049122	DNA/RC#Helitron-9_CGi	27.9	+	259
ARIC00001	1065290	1065338	LINE/CR1#CR1-104_AAe	12.2	+	79
ARIC00001	1117079	1117141	LTR/Gypsy#Gypsy-1_AC-I	26.3	+	94
ARIC00001	1155280	1155316	LINE/Soliton#Soliton8_Av	10.8	+	0
ARIC00001	1161161	1161199	DNA/hAT-Charlie#hAT-9_HRo	5.1	-	1
ARIC00001	1180452	1180480	DNA/CMC-Chapaev-3#Chapaev3-N1_HR	6.9	-	735
ARIC00001	1183475	1183512	LTR/Gypsy#Gypsy61-I_AG	15.8	-	20
ARIC00001	1226622	1226662	DNA/Maverick#Polinton-1_PBa	17.1	-	79
ARIC00001	1251377	1251421	LTR/Pao#BEL-3_DAn-I	11.1	-	2
ARIC00001	1258056	1258096	DNA/TcMar-Tc1#Mariner-52_HSal	14.6	-	1
ARIC00001	1259366	1259609	DNA/RC#Heli3a_Av	21	+	0
ARIC00001	1266481	1267706	DNA/RC#rnd-1_family-129	14.4	+	28
ARIC00001	1305134	1305224	LTR/Gypsy#Gypsy8-I_Dpse	23.6	-	468
ARIC00001	1305159	1305224	LINE/I-Jockey#Ag-Jock-1	21.2	-	442
ARIC00001	1305225	1305259	LINE/R1#RTAg4	25.5	-	444
ARIC00001	1343492	1343529	LTR/Gypsy#rnd-5_family-130	15.8	-	156
ARIC00001	1362108	1362146	LTR/Gypsy#Gypsy-256_AA-I	12.8	+	7
ARIC00001	1367175	1367198	DNA/RC#rnd-6_family-3519	20.4	+	0
ARIC00001	1372090	1372152	LTR/Gypsy#rnd-6_family-954	19.4	-	0
ARIC00001	1389113	1389179	LTR/Gypsy#Gypsy-25_CGi-I	20	+	4
ARIC00001	1434110	1434192	LINE/I-Jockey#Jockey-3_DPer	23.2	-	591
ARIC00001	1440819	1440863	PLE/Penelope-Athena#AthW2-1	20.5	-	254
ARIC00001	1440825	1440871	PLE/Penelope-Athena#AthW2-2	15.597	+	260
ARIC00001	1442238	1442284	LINE/L1#rnd-5_family-2546	13.1	-	146
ARIC00001	1466225	1466258	DNA/Kolobok-T2#Kolobok-2_AP	5.9	-	2
ARIC00001	1472188	1472357	LTR/Gypsy#Gypsy-35_CGi-I	25.1	+	238
ARIC00001	1533666	1533752	DNA/hAT-Ac#rnd-5_family-929	21.4	-	0
ARIC00001	1537108	1537186	DNA/CMC-EnSpm#EnSpm3_Av	16.7	+	11
ARIC00001	1544487	1544523	DNA/Kolobok-E#KolobokE-2_TC	5.4	+	60
ARIC00001	1554704	1554717	DNA/Dada#rnd-5_family-636	24.3	+	67
ARIC00001	1591287	1591298	LTR/Gypsy#Gypsy61-I_AG	16.1	+	3292
ARIC00001	1623368	1623483	DNA/hAT-Ac#rnd-5_family-2953	22.1	+	73
ARIC00001	1645457	1645569	DNA/RC#rnd-6_family-3519	29.2	+	290097
ARIC00001	1648306	1648347	LTR/Pao#BEL1-I_Dya	14.7	+	256
ARIC00001	1648993	1649095	DNA/RC#rnd-6_family-3519	21.4	-	76219
ARIC00001	1652379	1652458	DNA/RC#rnd-6_family-3519	30	+	68391
ARIC00001	1656407	1656537	DNA/RC#rnd-6_family-3519	20.6	-	105228
ARIC00001	1659721	1659851	LINE/I-Jockey#TART_DV	23.8	-	172
ARIC00002	2572	2615	DNA/hAT-Ac#Homo10	18.2	+	191
ARIC00002	41386	41439	LTR/Gypsy#Gypsy14-LTR_Dpse	24.5	-	0
ARIC00002	55343	55380	LTR/Gypsy#Gypsy-87_AA-I	18.4	+	3
ARIC00002	55629	55670	DNA/Crypton#Crypton_Av	19.1	+	9
ARIC00002	55908	57561	LINE/I-Jockey#Ag-Jock-1	26.573	+	136
ARIC00002	55957	56852	LINE/R1#RTAg4	27.505	+	61
ARIC00002	55984	56096	LINE/R1#RTAg4	29.6	+	14
ARIC00002	56097	56512	LINE/R1#RT1	27.1	+	20
ARIC00002	56986	57114	PLE/Penelope-Athena#AthL3	27.1	+	35
ARIC00002	81379	81423	DNA/Crypton#Crypton-1_CTe	13.3	-	387
ARIC00002	90958	90969	LTR/Gypsy#Gypsy-35_CGi-I	30.9	-	301
ARIC00002	99462	99497	LTR/Gypsy#Gypsy-2_DTa-I	8.3	-	8
ARIC00002	125388	160868	LTR/Gypsy#rnd-5_family-130	2.4	-	7673
ARIC00002	170595	170660	LINE/R1#R1_DYa	24.1	+	53
ARIC00002	186652	186724	LINE/I-Jockey#Jockey-3_DGri	22.9	+	19
ARIC00002	187288	187332	DNA/Dada#rnd-5_family-636	9.8	-	32
ARIC00002	195404	195419	LTR/Gypsy#Gypsy37-I_AG	27.6	-	84
ARIC00002	195420	195490	PLE/Penelope-Athena#AthK-V	13.4	-	130
ARIC00002	195659	195696	LTR/Gypsy#Gypsy61-I_AG	13.2	+	113
ARIC00002	211548	211603	PLE/Penelope-Athena#AthW	19.6	-	32
ARIC00002	237280	237381	LTR/Gypsy#rnd-5_family-2108	24.8	+	14
ARIC00002	266624	266728	DNA#DNA2-10_CGi	32	-	73
ARIC00002	327568	330354	PLE/Penelope#Penelope3b_Av	32.154	+	140
ARIC00002	329864	329987	PLE/Penelope#Penelope4_Av	23.3	+	14
ARIC00002	346494	346584	LTR/Gypsy#rnd-6_family-954	24.8	+	938
ARIC00002	346591	346686	LTR/Gypsy#Gypsy-11_AA-I	19.1	+	550
ARIC00002	357327	357394	DNA/Dada#rnd-5_family-636	25	+	165
ARIC00002	357340	357405	LTR/Gypsy#Gypsy-35_CGi-I	24.6	+	163
ARIC00002	368780	368833	LTR/Pao#BEL-9_DAn-I	17.3	-	17
ARIC00002	375392	375420	LINE/I-Jockey#Jockey-3_DSim	6.9	-	30
ARIC00002	384649	384702	DNA/MULE-MuDR#MuDR14_Av	21.2	-	0
ARIC00002	384871	384916	DNA/MULE-MuDR#MuDR14_Av	11.1	+	0
ARIC00002	387163	388181	LINE/L1#rnd-5_family-8088	28.178	+	45
ARIC00002	388346	388432	LINE/L2#Kiri-13_HMM	17.4	+	3
ARIC00002	392908	393040	DNA/RC#rnd-1_family-129	12.8	+	0
ARIC00002	393439	394060	DNA/TcMar-Mariner#Avmar5a_Av	26.363	+	9
ARIC00002	523458	523513	LINE/Proto2#Proto2-1_CTe	9.2	-	0
ARIC00002	526262	526318	LTR/Pao#rnd-5_family-2230	5.8	+	0
ARIC00002	529061	529258	LTR/Gypsy#ltr-1_family-3	31.6	+	1
ARIC00002	554226	554258	DNA/TcMar-Tc1#Mariner-13_LSal	9.1	+	34
ARIC00002	583869	583951	DNA/CMC-Chapaev#Chapaev-1_AA	23.4	+	22
ARIC00002	600931	600989	LTR/Gypsy#Gypsy-N1_DPu-I	16.4	+	15
ARIC00002	606851	606915	LTR/Gypsy#Gypsy63-I_AG	18.1	+	40
ARIC00002	613473	613526	LTR/Pao#BEL-83_AA-I	25.9	+	38
ARIC00002	629460	629579	PLE/Penelope-Athena#AthJ-W	26.3	-	51
ARIC00002	673621	673668	LTR/Gypsy#Gypsy-73_CQ-I	8.3	-	46
ARIC00002	702824	702862	LTR/Pao#BEL-155_AA-I	8.1	+	303
ARIC00002	721574	721635	DNA/hAT-Blackjack#hAT-16N2_LMi	19.4	-	18
ARIC00002	738435	738531	DNA/RC#Heli2_Av_cons	21.3	-	2
ARIC00002	741074	741118	DNA/RC#Heli1_Av	26.4	+	156
ARIC00002	753981	754010	LTR/Gypsy#Gypsy-12_DTa-I	10	+	0
ARIC00002	757374	757486	DNA/Dada#rnd-5_family-636	23.4	+	428
ARIC00002	763983	764043	DNA/Sola-1#Sola1-1_AC	24.6	-	0
ARIC00002	769640	769684	LTR/Gypsy#Gypsy-21_DBp-I	24.4	-	27
ARIC00002	788988	789050	DNA/Kolobok#Kolobok-10N1_CGi	24.2	-	48
ARIC00002	816362	816431	LTR/Gypsy#Gypsy-18_DWil-LTR	14.7	+	333
ARIC00002	858437	858483	LINE/L1#L1-27_LSal	17	+	57
ARIC00002	895246	895281	DNA/P#P10_Av	11.1	-	15
ARIC00002	921629	921713	DNA/hAT-Ac#rnd-5_family-929	21.9	+	74
ARIC00002	946694	946750	LTR/Copia#Copia-2_LMi-I	19.3	-	6
ARIC00002	951595	951645	LTR/Gypsy#Gypsy37-I_AG	14	-	16
ARIC00002	970413	970486	LINE/RTE-BovB#rnd-6_family-3671	25.4	+	3
ARIC00002	975087	975146	DNA/Crypton#Crypton-1_CTe	20.7	-	268
ARIC00002	999991	1000067	DNA/TcMar-Mariner#rnd-1_family-62	11.8	-	107
ARIC00002	1000777	1000908	PLE/Penelope-Athena#AthL2	11.3	-	3
ARIC00002	1000915	1001058	DNA/Ginger#Ginger2d_Av	18.4	-	0
ARIC00002	1001056	1001563	DNA/RC#Heli1_Av	22.2	+	2
ARIC00002	1002962	1003104	DNA/MULE-MuDR#MuDR13_Av	23.7	+	2
ARIC00002	1002975	1003149	DNA/MULE-MuDR#MuDR16_Av	22.8	-	3
ARIC00002	1003588	1003991	DNA/RC#Heli1_Av	21.8	+	1
ARIC00002	1020416	1020479	DNA/RC#Helitron-N1_PBa	12.7	-	74
ARIC00002	1051084	1051187	LTR/ERV1#rnd-5_family-1703	24.6	+	18
ARIC00002	1063303	1063363	LTR/Gypsy#Gypsy3-I_AG	16.2	-	0
ARIC00002	1091926	1092029	DNA/MULE-MuDR#MuDR4x_AP	22.7	-	169
ARIC00002	1204444	1204531	PLE/Penelope-Athena#AthW1	25	-	227
ARIC00002	1204506	1204539	LTR/Gypsy#Gypsy-208_AA-I	6.1	-	101
ARIC00002	1257425	1257462	DNA/Crypton#Crypton-1_CTe	13.2	-	0
ARIC00002	1257575	1257659	DNA/Ginger#Ginger1-1_AC	37.6	-	0
ARIC00002	1257588	1257662	DNA/Maverick#Polinton-1_ACe	25.3	-	0
ARIC00002	1281149	1281214	LTR/ERV1#rnd-5_family-1703	19.8	-	5
ARIC00002	1357014	1357118	LINE/RTE-BovB#RTE-16_LMi	24.6	+	2
ARIC00002	1367400	1367459	LTR/Gypsy#Gypsy2-I_Dmoj	20.6	+	0
ARIC00002	1375278	1375317	LTR/Gypsy#rnd-6_family-954	15	+	2
ARIC00002	1376337	1376421	LINE/I-Jockey#TART_DV	17	-	20
ARIC00002	1376353	1376431	LINE/L1#L1-45_AAe	29.1	+	19
ARIC00002	1378423	1378464	PLE/Penelope-Athena#AthJ-W	16.7	-	0
ARIC00002	1418105	1418157	LINE/Soliton#Soliton6_Av	11.8	+	11
ARIC00002	1435383	1435455	LTR/ERV1#rnd-5_family-199	28.8	-	77
ARIC00002	1439649	1439699	PLE/Penelope-Athena#AthX-V-T	20	+	126
ARIC00002	1439767	1439833	LINE/L2#Daphne-7_CTe	17.9	-	108
ARIC00002	1464996	1465037	LTR/Gypsy#Gypsy-52_DWil-I	12.2	-	79
ARIC00002	1477529	1477596	LTR/Gypsy#Gypsy-42_CGi-I	20.4	-	9
ARIC00002	1555998	1556046	LTR/Gypsy#Gypsy6-NVi_LTR	6.1	+	36
ARIC00002	1555999	1556052	DNA/Kolobok-T2#Kolobok-2_AP	20.4	+	36
ARIC00002	1561109	1561436	LINE/I-Jockey#TART_DV	24.123	+	863
ARIC00002	1561292	1561369	LINE/CR1#CR1-2_CQ	26	+	476
ARIC00002	1566471	1566508	LINE/I-Jockey#rnd-5_family-1249	13.2	+	1
ARIC00002	1570293	1570468	DNA/P#P1_Av	26.1	+	44
ARIC00002	1574864	1574949	LTR/Unknown#ltr-1_family-20	3.5	-	0
ARIC00002	1577597	1578093	DNA/MULE-MuDR#rnd-5_family-3876	15.5	-	177
ARIC00002	1579475	1580476	DNA/TcMar-Mariner#Avmar9_Av	13.2	+	86
ARIC00002	1593528	1593540	LINE/L2#L2-13_Hmel	22.6	-	12
ARIC00002	1593541	1593632	DNA/P#P-1_LHu	22.8	-	12
ARIC00002	1594003	1594049	LTR/Pao#rnd-5_family-2230	10.6	-	28
ARIC00003	1318	38997	LTR/ERV1#rnd-5_family-1703	0.2	-	24125
ARIC00003	51982	52155	LINE/I-Jockey#rnd-5_family-1249	7.2	+	1
ARIC00003	53433	53518	LTR/Copia#Copia-33_DPu-I	26.2	+	29
ARIC00003	68384	68517	LTR/Pao#rnd-5_family-859	26.4	-	57
ARIC00003	78743	79199	LTR/Gypsy#rnd-5_family-2108	32.9	+	7
ARIC00003	79792	80511	LTR/Gypsy#rnd-5_family-2108	32.4	+	178
ARIC00003	101979	102030	LTR/Gypsy#Gypsy61-I_AG	17.3	+	37
ARIC00003	145681	145750	DNA/PIF-ISL2EU#ISL2EU-18_CGi	27.1	-	0
ARIC00003	145699	145774	DNA#DNA-11_CGi	10.6	-	0
ARIC00003	262739	263034	LTR/Unknown#ltr-1_family-8	4.4	+	112
ARIC00003	263035	265429	LTR/Unknown#ltr-1_family-9	6	+	319
ARIC00003	265430	265718	LTR/Unknown#ltr-1_family-8	10.7	+	22
ARIC00003	265785	266511	LTR/Unknown#ltr-1_family-9	29	+	31
ARIC00003	269724	269986	LTR/Unknown#ltr-1_family-8	29.6	+	10
ARIC00003	270537	270718	LTR/Unknown#ltr-1_family-9	30.3	+	4
ARIC00003	286308	286371	SINE/tRNA-Deu#BivaMD-SINE1_TeGr	20.6	+	83
ARIC00003	286372	286409	SINE/tRNA-RTE#SINE2-1_PXu	29.7	+	87
ARIC00003	319148	319348	LTR/Unknown#ltr-1_family-10	6.1	+	0
ARIC00003	386730	386809	LTR/ERV1#rnd-5_family-1703	12.5	+	0
ARIC00003	386890	386980	LTR/ERV1#rnd-5_family-1703	12.2	+	0
ARIC00003	390562	390665	LTR/ERV1#rnd-5_family-1703	15.7	-	2
ARIC00003	422289	422351	DNA/RC#Helitron-like-6b_Hmel	19.4	+	0
ARIC00003	448284	448858	DNA/hAT-Ac#rnd-6_family-3575	33.2	-	38
ARIC00003	457205	457246	DNA/Maverick#Polinton-1_TC	10.3	-	267
ARIC00003	460207	460273	DNA/Kolobok-T2#REP-4_PBa	21.6	+	89
ARIC00003	460231	460297	DNA/Sola-2#Sola2-4_LMi	22.4	+	67
ARIC00003	460236	460308	PLE/Penelope#Penelope-83_LMi	28.8	-	55
ARIC00003	492774	492874	LINE/L1#L1-47_LSal	26.8	+	13
ARIC00003	496075	496178	DNA/hAT-Ac#hAT-N1_DEl	22	+	79
ARIC00003	508863	509825	LINE/L2#rnd-5_family-1522	28.9	+	26
ARIC00003	541900	542160	LTR/Unknown#ltr-1_family-8	34.4	+	42
ARIC00003	558603	558695	DNA/RC#rnd-6_family-3519	6.6	-	0
ARIC00003	576951	576967	LTR/Juno-Vesta#Vesta4a_Av	26.8	+	83
ARIC00003	576968	577109	DNA/Merlin#Merlin1_Av	24.7	-	85
ARIC00003	672672	672735	DNA/TcMar-ISRm11#Mariner-28_RPr	16.4	+	49
ARIC00003	677109	677153	DNA/hAT-hAT19#hAT-N15_AP	15.6	+	5
ARIC00003	724508	727907	DNA/hAT-Ac#rnd-5_family-2953	28.666	+	7554
ARIC00003	736387	736453	LINE/CR1#CR1-45_AAe	13.4	-	12
ARIC00003	824098	824151	LINE/L2#L2-40_HRo	15.1	-	416
ARIC00003	846373	846408	LTR/Pao#BEL-6_DYa-I	16.7	+	94
ARIC00003	859357	859440	LINE/I-Jockey#Jockey-3_DGri	27.4	+	34
ARIC00003	863385	863464	DNA/CMC-EnSpm#DNA3-1_CGi	21.4	+	1
ARIC00003	871975	872108	LTR/Gypsy#Gypsy61-I_AG	23.8	+	987
ARIC00003	904302	904392	LTR/Gypsy#Gypsy61-I_AG	20.9	+	737
ARIC00003	921028	921083	LINE/R2-Hero#HERO-4_HR	26.8	-	8
ARIC00003	960182	960526	LTR/Pao#rnd-6_family-1773	28.929	+	223
ARIC00003	963013	963062	LTR/Gypsy#Gypsy-85_AA-I	19.7	+	0
ARIC00003	968690	968757	DNA/RC#rnd-6_family-3519	21.2	+	0
ARIC00003	987982	989011	LINE/I-Jockey#Jockey-3_DGri	23.313	-	6
ARIC00003	988760	989239	LINE/R1#RTAg4	28.5	-	0
ARIC00003	1017212	1017265	DNA#rnd-5_family-4923	18.9	+	646
ARIC00003	1036673	1036732	LINE/L1#rnd-5_family-2546	20.3	-	172
ARIC00003	1048141	1048203	DNA#rnd-5_family-4923	21	-	1
ARIC00003	1065641	1065771	LTR/ERV1#rnd-5_family-199	22.9	-	3
ARIC00003	1068845	1069670	LTR/Ngaro#rnd-5_family-1935	27.043	-	1003
ARIC00003	1070243	1070282	LTR/Copia#Copia-29_DPu-I	10	+	27
ARIC00003	1123796	1123846	LINE/I-Jockey#Jockey-6_RPr	19.6	+	0
ARIC00003	1178037	1178094	DNA#DNA2-7_CGi	20.1	+	51
ARIC00003	1178068	1178129	DNA#DNA2-10_CGi	18.3	-	52
ARIC00003	1181980	1182030	PLE/Penelope-Athena#AthW1-J-R	16	-	82
ARIC00003	1227064	1227106	DNA/Maverick#Polinton-3_TC	18.6	+	18
ARIC00003	1230847	1230904	DNA/Maverick#Polinton-9_NVi	22.4	-	28
ARIC00003	1230909	1230928	DNA/hAT-Ac#Homo10	24.1	+	27
ARIC00003	1246986	1247060	LINE/R1#RTAg4	28	+	38
ARIC00003	1247224	1247256	DNA/PiggyBac#piggyBac-2_HRo	9.1	+	33
ARIC00003	1264485	1264495	LTR/Gypsy#Gypsy37-I_AG	28.1	-	157
ARIC00003	1265566	1265601	LTR/Gypsy#Gypsy-1_DBp-I	8.3	+	4
ARIC00004	2607	2623	DNA/PiggyBac-PB#AvPB1	14.7	-	0
ARIC00004	2624	2779	DNA/hAT#hAT14_Av	18.4	-	0
ARIC00004	2707	2865	DNA/hAT#hAT14_Av	20.9	+	3
ARIC00004	8714	8771	LTR/Gypsy#Gypsy-55_CGi-I	17.2	+	0
ARIC00004	12014	12302	DNA/PiggyBac#piggyBac9_Av	27.2	+	4
ARIC00004	21629	22302	DNA/MULE-MuDR#MuDR5_Av	23.4	+	2
ARIC00004	22594	24039	DNA/RC#Heli3a_Av	14.7	-	9
ARIC00004	25477	25580	DNA/TcMar-Tc1#rnd-5_family-112	24.3	+	2
ARIC00004	65865	65969	LTR/Gypsy#Gypsy-35_CGi-I	25.4	+	142
ARIC00004	65901	65970	LTR/Gypsy#Gypsy61-I_AG	26.1	-	123
ARIC00004	81450	81515	LTR/Gypsy#rnd-5_family-130	23.1	-	657
ARIC00004	136694	136777	DNA/TcMar-Tc1#Mariner-19_HSal	20	+	10
ARIC00004	136738	136821	DNA/RC#Helitron-N1_PBa	19.5	+	13
ARIC00004	136742	136787	LINE/CR1#CR1-14_HRo	13	-	10
ARIC00004	136788	136844	DNA/hAT-Pegasus#Homo6	29.4	-	16
ARIC00004	140056	140089	PLE/Penelope-Athena#AthX-V-T	5.9	-	0
ARIC00004	140059	140101	PLE/Penelope-Athena#AthX-V-S	9.5	-	0
ARIC00004	149665	149726	DNA/Kolobok-T2#Kolobok-N1_PBa	21.7	-	2
ARIC00004	158680	158822	LTR/ERV1#rnd-5_family-1703	26.1	+	258
ARIC00004	167394	167480	LTR/Pao#rnd-5_family-2230	20.1	-	11
ARIC00004	179497	179558	LINE/I-Jockey#HeT-A3_DVi	21	-	28
ARIC00004	180377	180485	PLE/Penelope-Athena#AthJ-W	26.6	-	23
ARIC00004	235393	235610	LTR/Gypsy#Gypsy-43_DWil-I	26	+	2
ARIC00004	306262	306607	DNA/TcMar-Pogo#rnd-5_family-540	25.6	-	3
ARIC00004	306889	307226	LTR/TelKA#TelKA1a_Av	23.8	+	47
ARIC00004	311023	311153	DNA/TcMar-Mariner#Avmar3_Av	23.4	+	3
ARIC00004	368373	368437	LTR/Pao#BEL-2_LH-I	24.6	-	9
ARIC00004	371073	371129	LTR/Gypsy#Gypsy-20_CGi-I	17.9	-	1225
ARIC00004	381946	400000	DNA/Dada#rnd-5_family-636	2.3	-	1224
ARIC00004	402078	402138	LTR/Gypsy#rnd-6_family-954	18.9	+	0
ARIC00004	411690	411740	DNA/Ginger#Ginger2c_Av	19.6	+	5
ARIC00004	413149	413218	LINE/L2#Daphne-1_CTe	21.7	-	839
ARIC00004	465622	465687	LTR/Gypsy#Gypsy7-I_Dmoj	20.6	+	21
ARIC00004	469189	469253	DNA/Maverick#Polinton-2_ACe	23.1	-	15
ARIC00004	491684	491727	LINE/L2#CR1-2_TCa	9.3	+	28
ARIC00004	499672	499759	LINE/L1#rnd-5_family-2546	16.4	-	5
ARIC00004	512571	512619	LTR/Gypsy#Gypsy-172_AA-I	18.8	+	211
ARIC00004	512590	512624	LINE/I-Jockey#Jockey-3_DGri	14.3	+	191
ARIC00004	530740	530788	DNA#DNA9-2_LSal	16.3	-	15
ARIC00004	554195	554253	LTR/Copia#Copia-12_LMi-I	23.7	-	91
ARIC00004	560489	561642	SINE?#rnd-4_family-826	31	+	558
ARIC00004	572635	572693	LTR/Gypsy#rnd-5_family-3055	16.4	-	53
ARIC00004	577078	577125	DNA/Kolobok-T2?#Kolobok-N1_AEc	14.6	+	0
ARIC00004	580555	580625	DNA/TcMar-Tc1#Clu-168_AG	22.1	+	2
ARIC00004	584733	584795	LTR/Pao#BEL-3_DAn-I	19.1	+	2127
ARIC00004	615344	615696	DNA/Merlin#Merlin1_Av	31.3	-	0
ARIC00004	625943	626004	LINE/I#Loner_Ele1	21.7	-	107
ARIC00004	713170	713667	DNA/TcMar-Tc1#Tc5_cons_Av	25.879	-	17
ARIC00004	773791	773835	LTR/Gypsy#ltr-1_family-27	16.3	+	28
ARIC00004	789896	789950	LTR/Gypsy#Gypsy-38_DWil-I	16.4	-	118
ARIC00004	803793	803847	LTR/Gypsy#Gypsy-35_CGi-I	19.2	+	240
ARIC00004	820513	820619	DNA/PIF-Harbinger#DNA3-13B_CGi	29	+	16
ARIC00004	826294	826355	PLE/Penelope#Penelope-6_HRo	16.1	+	101
ARIC00004	826304	826363	DNA/hAT-Tip100#hAT-6_HRo	11.9	-	101
ARIC00004	826305	826375	LINE/L2#Kiri-5_HMM	15.5	-	101
ARIC00004	832817	832883	DNA/RC#Helitron-9_CGi	26.9	+	496
ARIC00004	840354	840390	LTR/Gypsy#Gypsy-23-I_NVi	13.5	-	6
ARIC00004	842016	842277	DNA/P#P8_Av	21.3	-	41
ARIC00004	862115	862190	DNA/Maverick#Polinton-8_NVi	25	-	652
ARIC00004	864839	864896	PLE/Penelope-Athena#AthW2-1	16.1	+	304
ARIC00004	865292	865355	DNA/Maverick#Polinton-7_NVi	20.6	+	349
ARIC00004	893719	894558	DNA/Sola#Sola2c_Av	28.789	-	3
ARIC00004	949717	949773	LTR/Gypsy#Gypsy-88_CQ-I	24.6	-	271
ARIC00004	949718	949821	LINE/L2#Daphne-38_HRo	31	-	361
ARIC00004	957257	958043	LTR/Juno-Vesta#Juno2_Av	25.992	+	32
ARIC00004	978290	978326	LTR/Gypsy#CER1	13.5	+	21
ARIC00004	979866	979935	PLE/Penelope-Athena#AthW	19.7	+	117
ARIC00004	1043339	1043389	LTR/Gypsy#Gypsy-11_MMa-I	12.5	-	18
ARIC00004	1072878	1072939	LINE/I-Jockey#Jockey_Ele2	24.2	+	150
ARIC00004	1093237	1094070	SINE?#rnd-4_family-826	31.6	-	40
ARIC00004	1122535	1122604	LTR/Copia#Copia-10_DPu-I	19.4	-	22
ARIC00004	1134938	1134998	LTR/Gypsy#Gypsy-13_CFl-I	23.8	-	0
ARIC00004	1163420	1163485	LTR/Gypsy#rnd-5_family-130	20.7	+	46
ARIC00004	1172941	1173007	PLE/Penelope-Athena#AthX-V-T	20	+	104
ARIC00004	1180892	1181116	DNA/TcMar-Tc1#rnd-4_family-1744	23.9	-	0
ARIC00004	1181766	1181984	DNA/Sola#Sola2c_Av	30.9	+	6
ARIC00004	1182059	1183220	LINE/I-Jockey#rnd-5_family-1249	6	+	13
ARIC00004	1184087	1184553	LINE/I-Jockey#rnd-5_family-1249	6.5	+	37
ARIC00005	29006	29067	DNA#rnd-5_family-4923	2.2	-	34
ARIC00005	88097	88153	DNA/hAT#hAT4_Av	26.3	-	44
ARIC00005	135150	135187	LTR/Gypsy#Gypsy-22_CQ-I	15.8	+	72
ARIC00005	141603	141768	LINE/I-Jockey#TART_DV	20.1	+	205
ARIC00005	141653	141807	LINE/CR1#CR1-2_CQ	25.2	+	224
ARIC00005	141664	141770	LTR/Gypsy#Gypsy-16_DPu-I	23.4	+	192
ARIC00005	146935	146991	LINE/I#I_Ele14	26.3	-	80
ARIC00005	201119	201197	DNA/Crypton#Crypton-1_CTe	17.3	+	35
ARIC00005	201138	201175	DNA/Dada#rnd-5_family-636	13.2	+	24
ARIC00005	206196	206240	PLE/Penelope#Penelope-6_HRo	17.8	-	79
ARIC00005	210435	210730	LINE/I-Jockey#Ag-Jock-1	25.3	+	24
ARIC00005	210496	211132	LINE/I-Jockey#Jockey-3_DGri	23.3	+	60
ARIC00005	210731	211198	LINE/R1#RTAg4	29.5	+	51
ARIC00005	211183	212018	LINE/I-Jockey#TART_DV	25.654	+	122
ARIC00005	211407	211454	LINE/I-Jockey#TART_DV	26.2	+	25
ARIC00005	211455	211583	PLE/Penelope-Athena#AthL3	27.1	+	38
ARIC00005	235722	235766	DNA/Crypton#Crypton-1_CTe	13.3	-	173
ARIC00005	245287	245524	LTR/Gypsy#Gypsy-35_CGi-I	24.2	-	1050
ARIC00005	249551	249628	LTR/Ngaro#rnd-5_family-1935	20	-	0
ARIC00005	254317	254352	LTR/Gypsy#Gypsy-2_DTa-I	8.3	-	6
ARIC00005	280002	315610	LTR/Gypsy#rnd-5_family-130	2.831	-	8098
ARIC00005	318863	318942	SINE?#rnd-5_family-4379	20.8	-	1
ARIC00005	325260	325284	LINE/R1#R1_DYa	27	+	415
ARIC00005	325285	325346	LINE/I-Jockey#Ag-Jock-1	22.6	-	441
ARIC00005	341425	341499	LTR/Gypsy#Gypsy-1_AC-I	19.3	+	61
ARIC00005	341441	341503	LINE/R1#R1_DYa	16.2	-	62
ARIC00005	341452	341522	LINE/L1#L1_Ele5	28.6	-	64
ARIC00005	350149	350220	DNA/hAT#hAT4_Av	19.1	-	159
ARIC00005	350183	350235	PLE/Penelope-Athena#AthX-V-T	13.5	-	160
ARIC00005	350405	350500	LTR/Gypsy#Gypsy61-I_AG	26.4	+	241
ARIC00005	355470	355542	LTR/ERV1#rnd-5_family-1703	11.6	+	75
ARIC00005	366273	366371	PLE/Penelope-Athena#AthW2-2	22.1	-	36
ARIC00005	498443	498533	LTR/Gypsy#rnd-6_family-954	24.8	+	897
ARIC00005	509860	509932	LTR/Unknown#ltr-1_family-10	12.3	+	5
ARIC00005	509930	509951	LTR/Pao#rnd-5_family-2230	20.5	-	5
ARIC00005	527301	527329	LINE/I-Jockey#Jockey-3_DSim	6.9	-	21
ARIC00005	531274	531391	LTR/Pao#rnd-5_family-859	23.9	-	251
ARIC00005	533655	533717	PLE/Penelope#Penelope-83_LMi	22.2	+	55
ARIC00005	533665	533724	DNA/Kolobok-T2#REP-4_PBa	16.7	+	52
ARIC00005	533850	533896	DNA/Crypton#Crypton-1_CTe	19.1	-	110
ARIC00005	533851	533927	PLE/Penelope#Penelope-5_HRo	17.3	-	125
ARIC00005	536779	536824	DNA/MULE-MuDR#MuDR14_Av	8.9	+	0
ARIC00005	539100	540118	LINE/L1#rnd-5_family-8088	28.279	+	108
ARIC00005	543097	543150	DNA/PiggyBac-PB#AvPB1	9.3	-	1
ARIC00005	543151	543922	DNA/hAT#hAT14_Av	24.557	+	18
ARIC00005	545674	545845	DNA/RC#rnd-1_family-129	12.2	+	1
ARIC00005	547265	547901	DNA/TcMar-Mariner#Avmar5a_Av	26.366	+	8
ARIC00005	553691	553756	LINE/I-Jockey#Jockey-3_DGri	27.3	-	143
ARIC00005	564536	564605	DNA#DNA8-3_LMi	13	+	0
ARIC00005	626796	626854	LTR/Copia#Copia-38_DPu-I	21.1	-	26
ARIC00005	651592	651646	LINE/L2#L2-8_NVi	16.6	+	1
ARIC00005	651647	651669	DNA/Zisupton#rnd-4_family-860	18.4	-	1
ARIC00005	683097	683308	LTR/Juno-Vesta#Vesta6a_Av	27.1	-	0
ARIC00005	769918	769957	LINE/L1#rnd-5_family-8088	10.3	-	33
ARIC00005	792532	792583	LINE/CR1#CR1-16_HRo	14	-	44
ARIC00005	803277	803339	DNA/RC#Helitron-3N1_NVi	14.3	+	169
ARIC00005	849949	849989	LTR/Gypsy#Gypsy-33_CGi-I	19.5	-	0
ARIC00005	875333	875400	LINE/R1#Waldo-2_AAe	23.1	-	13
ARIC00005	893222	893267	DNA/RC#Heli1_Av	28.5	+	58
ARIC00005	903329	903394	DNA/hAT-Charlie#hAT-34_LSal	15.2	-	20
ARIC00005	940094	940178	DNA/Maverick#Polinton-8_NVi	30.6	+	16
ARIC00005	949305	949368	LTR/Gypsy#Gypsy-168_AA-I	19.7	-	15
ARIC00005	1008944	1008989	LTR/Pao#BEL-272_AA-I	17.8	+	43
ARIC00005	1010675	1010724	LINE/L1#L1-27_LSal	14.3	+	48
ARIC00005	1029588	1029629	LTR/Gypsy#Gypsy-18_LH-I	11.9	-	1149
ARIC00005	1038588	1038671	PLE/Penelope-Athena#AthW2-1	18.9	-	21
ARIC00005	1055376	1055443	LTR/Gypsy#Gypsy-83_CGi-I	15.9	+	0
ARIC00006	66110	66152	LTR/Pao#BEL-106_AA-I	13	-	11
ARIC00006	84753	84805	LTR/Copia#Copia-6_AG-LTR	14.4	-	165
ARIC00006	101239	101295	DNA/TcMar-Mariner#Mariner-13_ACe	17.8	-	30
ARIC00006	118382	118416	PLE/Penelope-Athena#AthJ-N	11.4	-	160
ARIC00006	122463	122498	DNA/hAT#hAT4_Av	5.6	+	79
ARIC00006	135696	135740	LTR/Pao#CER15-1-I_CE	13.3	+	2
ARIC00006	156450	156526	DNA/Maverick#Polinton-3_PBa	15.6	+	68
ARIC00006	156460	156542	DNA#DNA3-4_CGi	14.6	-	68
ARIC00006	163840	163869	DNA/TcMar-Tc4#MARINER54_CB	6.7	+	3753
ARIC00006	205453	205501	PLE/Penelope-Athena#AthW2-2	14.3	-	29
ARIC00006	210871	210896	LINE/R1#R1-N1_CFl	32.5	+	1
ARIC00006	210896	210959	LINE/L2#L2-8_NVi	17.2	-	2
ARIC00006	210897	210985	LTR/Gypsy#Gypsy68-I_AG	29.5	-	2
ARIC00006	218495	222440	LINE/L1-Tx1#Tx1_Av	29.683	-	87
ARIC00006	238744	238811	LINE/I-Jockey#Ag-Jock-1	25	-	28
ARIC00006	260298	260343	DNA/Sola-1#Sola1-2_AC	17.4	+	128
ARIC00006	260401	260472	LINE/I-Jockey#Jockey-3_DGri	16.7	-	172
ARIC00006	260404	260509	LTR/Gypsy#Gypsy-1_AC-I	28.4	-	206
ARIC00006	260422	260482	DNA/hAT-Ac#rnd-5_family-2953	7.4	-	172
ARIC00006	268950	269013	LTR/Ngaro#rnd-5_family-1935	19.4	-	195
ARIC00006	283935	283993	LTR/Gypsy#Gypsy-80_LMi-I	13.7	-	593
ARIC00006	291991	292031	LTR/Pao#BEL-30_CQ-LTR	14.6	+	304
ARIC00006	334309	334438	LINE/I-Jockey#Ag-Jock-1	22.5	+	182
ARIC00006	373179	373234	DNA#DNA-2_LMi	16.1	-	294
ARIC00006	383249	383310	DNA/CMC-Chapaev-3#Chapaev3-1_HR	15.2	+	135
ARIC00006	383259	383320	PLE/Penelope#Penelope-83_LMi	29	+	177
ARIC00006	387254	387334	PLE/Penelope-Athena#AthW1-J-R	20.1	+	40
ARIC00006	400120	400157	LINE/CR1-Zenon#CR1-2_CGi	8.6	+	0
ARIC00006	408171	408213	LTR/Gypsy#rnd-6_family-954	14.3	-	17
ARIC00006	426658	426942	DNA/hAT-Ac#rnd-6_family-3575	27.4	+	118
ARIC00006	472828	472907	DNA/hAT#hAT28a_Av	23.1	+	230
ARIC00006	475803	475855	DNA/hAT-Tip100#hAT-1_HRo	17.7	-	154
ARIC00006	478577	478635	LTR/Gypsy#Gypsy-23_DY-I	25.4	+	320
ARIC00006	490658	490769	DNA/Dada#rnd-5_family-636	29.1	-	69
ARIC00006	492143	492211	LINE/R1#MinoAg1	27.5	+	170
ARIC00006	492167	492247	LINE/I-Jockey#TART_DV	17.5	+	188
ARIC00006	495587	495654	LTR/Gypsy#Gypsy-29_DWil-I	16.3	-	34
ARIC00006	522412	522445	LTR/Copia#Copia-4_DPu-I	14.7	-	52
ARIC00006	524035	524127	DNA/Dada#rnd-5_family-636	22.2	-	21
ARIC00006	524053	524144	DNA/Dada#rnd-5_family-636	14.4	+	3
ARIC00006	530393	530449	LTR/Gypsy#rnd-5_family-2148	17.1	-	282
ARIC00006	559584	559618	LINE/CR1#CR1-8_CQ	11.4	-	73
ARIC00006	597849	597924	DNA/Maverick#Polinton-9_NVi	19.4	+	7
ARIC00006	606956	607032	PLE/Penelope-Athena#AthW2-2	27.6	-	30
ARIC00006	637167	637237	LTR/Pao#BEL-19_DWil-I	18.5	+	25
ARIC00006	658108	658170	DNA/CMC-EnSpm#EnSpm3_Av	15	+	295
ARIC00006	685711	685750	DNA/hAT-Tip100#hAT-13_LMi	20	-	10
ARIC00006	740277	741437	LINE/I-Jockey#Ag-Jock-1	26.713	-	1
ARIC00006	741286	741300	LINE/I-Jockey#Ag-Jock-1	28.6	-	0
ARIC00006	741301	741331	LTR/Pao#ROO_I	20.3	-	0
ARIC00006	741376	741414	LINE/R1#RTAg4	26.5	-	0
ARIC00006	772284	772359	LINE/L2#Kiri-8_AAe	16.6	+	44
ARIC00006	777642	777722	LTR/Gypsy#rnd-5_family-130	21.1	+	7
ARIC00006	808895	808910	LINE/I-Jockey#Jockey-3_DGri	25.7	-	3
ARIC00006	808911	808968	LTR/Pao#ROO_I	19	-	2
ARIC00006	808918	808977	LTR/Gypsy#Gypsy-1_AC-I	18.6	-	2
ARIC00006	815773	815859	DNA#DNA-11_CGi	12.2	-	0
ARIC00006	817552	817618	LTR/Gypsy#Gypsy61-I_AG	28.4	-	1
ARIC00006	820118	820168	DNA/Ginger#Ginger1-1_AC	20	+	157
ARIC00006	835263	835307	PLE/Penelope-Athena#AthW2-2	11.4	+	143
ARIC00006	847466	847547	LINE/L2#Crack-7_AAe	23.4	-	67
ARIC00006	847507	847612	LTR/Pao#BEL-10_DBp-I	11.6	+	96
ARIC00006	870205	870355	PLE/Penelope-Athena#AthM	15.3	+	3
ARIC00006	875092	875138	LTR/Gypsy#Gypsy-23_LMi-I	13	+	43
ARIC00006	878488	878693	LTR/Unknown#ltr-1_family-6	2.9	+	10
ARIC00006	879356	879584	DNA/TcMar-Mariner#Avmar11_Av	36.5	-	79
ARIC00006	902474	902565	DNA/Sola#Sola2d_Av	23.6	-	195
ARIC00006	920854	921026	LINE/I-Jockey#TART_DV	22.9	-	142
ARIC00006	926743	926795	LTR/Pao#BEL-255_AA-I	15.4	-	2122
ARIC00006	928597	928721	LINE/I-Jockey#TART_DV	27.4	-	37
ARIC00006	932638	932686	LTR/Gypsy#Gypsy-7_BM-I	16.7	-	5
ARIC00006	962216	1008771	DNA/hAT-Ac#rnd-5_family-2953	22.213	-	53431
ARIC00006	985252	985319	LTR/Gypsy#Gypsy-1_NG-I	25	+	6
ARIC00006	995948	995978	LTR/Gypsy#Gypsy37-I_AG	27.2	-	4
ARIC00006	1005276	1005332	LTR/Pao#BEL-21_DWil-I	17.5	+	56
ARIC00006	1023269	1023324	DNA/Crypton#Crypton-1_CTe	23.2	+	124
ARIC00006	1023274	1023338	DNA/Maverick#Polinton-1_PBa	20	-	121
ARIC00006	1023315	1023347	LTR/Gypsy#Gypsy61-I_AG	25	-	103
ARIC00006	1025212	1025270	LTR/Pao#BEL-122_AA-I	17.5	+	660
ARIC00006	1035203	1035296	DNA/TcMar-Tc1#Tc12_Av	28.3	+	0
ARIC00006	1035897	1036022	DNA/TcMar-Tc1#rnd-1_family-107	20.3	-	0
ARIC00006	1049776	1049842	DNA/hAT-Blackjack#hAT-4_PBa	21.6	+	181
ARIC00006	1053927	1053998	DNA/RC#Helitron-N34_CGi	18.3	+	0
ARIC00006	1090310	1090363	DNA/PiggyBac#piggyBac8_Av	11.5	+	585
ARIC00007	9938	10005	LINE/I#I_Ele16	20.7	-	1
ARIC00007	39103	39155	LINE/CR1-Zenon#Zenon-1_Hmel	13.3	+	10
ARIC00007	39965	50892	SINE?#rnd-5_family-4379	2.8	+	1270
ARIC00007	55746	55789	LTR/Gypsy#Gypsy-246_AA-I	14.3	+	43
ARIC00007	83927	83994	DNA/RC#HELITRON13_CB	19.7	-	472
ARIC00007	99556	99626	LTR/Pao#BEL-11_CGi-I	17.9	+	187
ARIC00007	116500	116561	DNA#DNA-19_LSal	17.7	-	124
ARIC00007	117347	117414	LTR/Gypsy#Gypsy-1_DRh-I	11.4	+	1
ARIC00007	118498	118547	LINE/L1#L1-56_LSal	12	-	20
ARIC00007	150714	150760	LTR/Juno-Vesta#Vesta5_Av	10.9	-	222
ARIC00007	190653	190707	LINE/CR1#CR1-100_AAe	17	-	34
ARIC00007	222500	222584	LTR/Copia#Copia-5_AA-LTR	15.5	+	12
ARIC00007	234812	235016	LTR/Unknown#ltr-1_family-6	7.8	+	0
ARIC00007	236235	236437	LINE/L1-Tx1#Tx1_Av	29.7	+	0
ARIC00007	251659	251716	LINE/I-Jockey#Jockey_Ele2	13.8	+	105
ARIC00007	257369	257411	LTR/Gypsy#Gypsy-169_AA-I	20.9	-	128
ARIC00007	258023	258674	DNA/Merlin#Merlin3_Av	30.7	+	65
ARIC00007	289756	289803	DNA/Maverick#Polinton-2_ACe	20.8	+	51
ARIC00007	294645	294682	DNA/Maverick#Polinton-1_DK	13.2	-	0
ARIC00007	316075	316129	LTR/Gypsy#Gypsy-31_LMi-LTR	23.6	-	3
ARIC00007	324564	324787	LINE/Soliton#Soliton6b_Av	31.2	+	0
ARIC00007	337854	337910	LTR/Gypsy#Gypsy-43_CQ-I	16.4	+	11
ARIC00007	350177	350243	LTR/Gypsy#Gypsy61-I_AG	23.9	-	43
ARIC00007	374883	374973	LTR/Pao#BEL-115_AA-LTR	18.1	-	109
ARIC00007	418353	418400	DNA/Zator#Zator-3_CGi	13.1	-	3
ARIC00007	430318	430369	LTR/Gypsy#Gypsy-35_CGi-I	13.5	-	0
ARIC00007	430333	430398	LTR/Pao#BEL-6_AA-LTR	25.9	+	0
ARIC00007	434113	447577	DNA/Dada#rnd-5_family-636	23.21	-	2986
ARIC00007	435406	435507	PLE/Penelope-Athena#AthW1-J-R	22.4	+	5
ARIC00007	479655	479689	LTR/Gypsy#Gypsy4-NVi_I	8.6	+	9
ARIC00007	519302	519381	PLE/Penelope-Athena#AthV-L1	19.2	+	55
ARIC00007	525243	525309	DNA/hAT-Ac#rnd-5_family-929	19.8	-	82
ARIC00007	532078	532115	DNA/Dada#rnd-5_family-636	18.3	+	14
ARIC00007	540482	540538	DNA/PIF-Spy#ISL2EU-N5B_CGi	19.3	+	730
ARIC00007	542184	542226	DNA/Kolobok-T2?#Kolobok-N1_AEc	13.9	+	625
ARIC00007	552590	552635	DNA/TcMar-Tc1#Tc1-1_TCa	15.2	-	108
ARIC00007	602822	602871	LTR/Gypsy#Invader1_I	14.3	-	49
ARIC00007	616549	616626	DNA/PIF-ISL2EU#ISL2EU1_Av	25.8	+	7
ARIC00007	646304	646778	DNA/hAT-Ac#rnd-5_family-929	28.6	-	41
ARIC00007	648012	648069	LTR/Gypsy#Gypsy-39_LSal-LTR	12.8	+	19
ARIC00007	653832	653887	DNA/IS3EU#IS3EU-N1_CGi	19.6	-	2
ARIC00007	676473	677078	DNA/TcMar-Tc1#Tc2_Av	13.527	+	21
ARIC00007	707744	707827	LINE/CR1#CR1-49_AAe	19.5	-	239
ARIC00007	720156	720239	LINE/RTE-BovB#rnd-6_family-3671	19.1	+	2
ARIC00007	754665	754755	DNA/hAT-Ac#rnd-5_family-929	17.1	+	7
ARIC00007	772373	772470	DNA/Maverick#Polinton-8_NVi	32	+	21
ARIC00007	787190	787281	LINE/I-Jockey#HeT-A3_DVi	19.3	-	29
ARIC00007	826165	826196	LTR/ERV1#rnd-5_family-199	9.4	-	981
ARIC00007	870328	870375	LTR/Gypsy#Gypsy-5_DRh-I	22.9	-	72
ARIC00007	873783	873823	PLE/Penelope#Penelope-2_AAe	12.2	-	4192
ARIC00007	938143	938199	DNA/PIF-Harbinger#Harbinger-5_CGi	22.3	+	1
ARIC00007	979774	979842	SINE?#rnd-4_family-826	23.2	+	53
ARIC00007	986086	986134	PLE/Penelope-Athena#AthJ-W	16.3	+	2
ARIC00007	1015403	1015496	DNA/hAT#hAT23_Av	15.9	+	0
ARIC00008	552	585	DNA/hAT-Ac#rnd-5_family-475	14.7	-	6
ARIC00008	8737	8809	LTR/Gypsy#Gypsy-23-LTR_NVi	27.4	+	0
ARIC00008	8782	8857	DNA#DNA2-7_CGi	16.9	+	0
ARIC00008	9969	10022	DNA/Maverick#Polinton-3_NVi	21.2	-	56
ARIC00008	12289	12397	LINE/L2#rnd-5_family-1522	23.1	+	140
ARIC00008	35773	35824	LTR/Gypsy#Gypsy61-I_AG	14.3	-	201
ARIC00008	35799	35810	DNA/Maverick#Polinton-1_PBa	23.5	-	170
ARIC00008	44915	45072	LTR/Ngaro#rnd-5_family-1935	28.5	-	0
ARIC00008	45537	45669	LTR/Ngaro#rnd-5_family-1935	28.9	-	0
ARIC00008	48747	48784	LINE/L1-Tx1#Tx1-3_CGi	10.5	-	41
ARIC00008	77495	77554	LINE/L2#Daphne-33_HRo	18.3	+	145
ARIC00008	80107	80162	DNA/TcMar-Tc1#Mariner-18_HSal	21.8	+	77
ARIC00008	81415	81463	DNA/Kolobok-T2?#Kolobok-N1_AEc	18.4	+	89
ARIC00008	81426	81477	LTR/Gypsy#Gypsy-12_DVir-I	21.1	+	90
ARIC00008	82843	82892	LTR/Gypsy#Gypsy68-I_AG	16	+	87
ARIC00008	84584	84627	DNA/Kolobok-T2?#Kolobok-N1_AEc	13.6	-	122
ARIC00008	84596	84642	DNA/RC#Helitron-3N1_NVi	14.9	+	122
ARIC00008	85349	85444	LTR/Gypsy#Gypsy-64_LMi-I	16.1	-	121
ARIC00008	88185	88250	DNA/Kolobok-Hydra#Kolobok-3_Aplcal	28.8	+	100
ARIC00008	88200	88250	DNA/TcMar-Tc1#Mariner-59N1_HSal	19.6	+	86
ARIC00008	88524	88598	DNA/CMC-Chapaev-3#Chapaev3-1_HR	22.2	+	202
ARIC00008	88665	88675	LINE/R1#TRAS3_BM	25.6	+	73
ARIC00008	88676	88742	LINE/L2#Daphne-29_HRo	22.4	-	56
ARIC00008	88684	88764	DNA/Maverick#Polinton-3_LMi	29.6	-	48
ARIC00008	101267	101305	LTR/Gypsy#Gypsy-71_CQ-I	10.3	+	5
ARIC00008	118034	118078	DNA/hAT-Ac#Homo3	11.4	+	265
ARIC00008	122764	157963	LINE/L1#rnd-5_family-8088	25.03	+	23161
ARIC00008	148299	148364	DNA/TcMar-Pogo#rnd-5_family-540	17.5	-	0
ARIC00008	166811	166854	DNA/RC#Heli3a_Av	4.5	+	0
ARIC00008	168231	168491	DNA/RC#Heli3_Av	29.7	-	3
ARIC00008	171619	171782	LTR/Unknown#ltr-1_family-6	11.1	+	25
ARIC00008	200404	200462	LTR/Gypsy#Gypsy-19_DTa-I	19.7	+	103
ARIC00008	218897	218942	LTR/Gypsy#Gypsy-35_CGi-I	17.4	-	7
ARIC00008	227272	227343	DNA/Kolobok-Hydra#Kolobok-7_CGi	20	+	4
ARIC00008	253872	253927	DNA/Crypton#Crypton-1_CTe	16.1	+	48
ARIC00008	277024	277065	LTR/Gypsy#Gypsy-22_RPr-I	19.1	-	148
ARIC00008	280767	280805	DNA/MULE-MuDR#MuDR-6_LSal	15.4	-	2
ARIC00008	288952	288992	PLE/Penelope-Athena#AthX-V-T	14.6	+	1180
ARIC00008	288961	289001	LINE/L1#rnd-5_family-8088	7.7	-	1140
ARIC00008	294222	294258	LTR/Gypsy#Gypsy-26_DPse-I	16.2	-	41
ARIC00008	300807	300885	DNA/Dada#rnd-5_family-636	28.6	+	0
ARIC00008	305931	306099	LTR/Gypsy#rnd-5_family-2148	32.9	-	1427
ARIC00008	308015	308057	LTR/Gypsy#Gypsy-23_DWil-I	16.3	+	151
ARIC00008	315343	315373	LTR/Gypsy#Gypsy-55_CGi-I	24.2	-	9
ARIC00008	316489	316537	LINE/L2#Daphne-29_HRo	24.5	+	43
ARIC00008	316495	316537	SINE/tRNA-Meta#HalSINE1	18.6	-	43
ARIC00008	316538	316557	DNA/hAT-Tip100#hAT-15_HRo	30.2	+	49
ARIC00008	323784	323866	DNA/TcMar-Mariner#Mariner-8_AEc	18.5	-	986
ARIC00008	325997	326083	DNA/TcMar-Tc1#Tc21_Av	27.9	-	74
ARIC00008	346717	346759	DNA/Maverick#Polinton-2_ACe	13.9	+	60
ARIC00008	346726	346799	LINE/I-Jockey#TART_DV	25.8	+	64
ARIC00008	346800	346815	DNA/hAT-Ac#rnd-5_family-2953	21.8	+	62
ARIC00008	360076	360095	SINE/tRNA-Meta#HalSINE1	19.7	-	193
ARIC00008	360096	360148	DNA/Ginger#Ginger1-1_AC	17	+	196
ARIC00008	360102	360157	DNA/TcMar-Tc1#Mariner-18_HSal	17.9	+	208
ARIC00008	360158	360174	LTR/Gypsy#Gypsy-6_AEc-LTR	20	-	172
ARIC00008	361821	361897	DNA/RC#Helitron-N21_CGi	19.2	+	453
ARIC00008	385465	385477	DNA/hAT-Ac#rnd-5_family-929	21.9	-	141
ARIC00008	385478	385546	LINE/RTE-BovB#rnd-6_family-3671	20.6	-	88
ARIC00008	389227	389274	LTR/Gypsy#rnd-6_family-954	16.7	+	10
ARIC00008	393548	393582	LINE/I-Jockey#Jockey-6_DF	11.4	-	455
ARIC00008	397742	397860	LTR/Gypsy#Gypsy68-I_AG	22	-	24
ARIC00008	401570	401643	PLE/Penelope#Penelope-83_LMi	28.4	-	4
ARIC00008	401574	401637	DNA/Maverick#Polinton-3_LMi	21.9	+	4
ARIC00008	401595	401668	DNA#rnd-5_family-4923	29.7	+	2
ARIC00008	401638	401664	DNA/Ginger#Ginger1-1_AC	30.4	+	0
ARIC00008	409910	412659	DNA/Zator#Zator1_Av	21.911	-	108
ARIC00008	410052	411166	DNA/Zator#Zator2_Av	26.8	-	41
ARIC00008	418406	418478	DNA/Maverick#Polinton-8_NVi	26	-	29
ARIC00008	419853	419933	DNA#DNA3-4_CGi	25.9	-	23
ARIC00008	423703	431930	DNA/Zisupton#rnd-4_family-860	2.1	-	1192
ARIC00008	456200	456273	LTR/Gypsy#rnd-5_family-2148	22.9	+	33
ARIC00008	471535	471613	LINE/L1#rnd-5_family-8088	26.3	+	20
ARIC00008	472772	472810	LTR/Gypsy#Gypsy-222_AA-I	12.8	-	37
ARIC00008	477122	477252	LTR/Juno-Vesta#Juno2_Av	20.3	+	37
ARIC00008	484588	484633	LINE/R1#RT1	21.7	+	37
ARIC00008	491624	491664	PLE/Penelope-Athena#AthX-V-T	14.6	-	61
ARIC00008	503935	504004	LINE/I-Jockey#Jockey-6_DPer	27.1	-	108
ARIC00008	538769	538836	LINE/L2#Daphne-38_HRo	19.2	+	8
ARIC00008	544994	545664	DNA/RC#Heli1_Av	23.935	-	82
ARIC00008	592927	592991	LTR/ERV1#rnd-5_family-199	29.2	+	55
ARIC00008	620924	621004	PLE/Penelope#Penelope-83_LMi	23.7	-	4
ARIC00008	634672	634877	LTR/Unknown#ltr-1_family-6	2.4	-	9
ARIC00008	642137	642456	DNA/RC#Heli3a_Av	24.4	-	0
ARIC00008	644487	644559	PLE/Penelope-Athena#AthJ-W	28.8	+	4
ARIC00008	698729	698762	DNA/TcMar-Mariner#Mariner-70_HSal	11.8	+	36
ARIC00008	699727	699780	DNA#DNA-22_LSal	16.7	+	6
ARIC00008	702516	702828	LTR/Gypsy#Gypsy-39_CQ-I	35.7	+	15
ARIC00008	708381	708436	LINE/I-Jockey#Jockey-14_DBp	17	+	5
ARIC00008	711608	711644	LTR/Pao#BEL-4_DBp-I	11.1	-	434
ARIC00008	724646	724722	LTR/Pao#BEL-8_LSal-I	18.4	-	38
ARIC00008	746332	746408	LTR/ERV1#rnd-5_family-1703	13.1	+	1915
ARIC00008	766579	766621	LINE/I#I-1_LHu	20.9	+	10
ARIC00008	808774	808885	LTR/Gypsy#Gypsy-21_DAn-LTR	14.1	-	1244
ARIC00008	809804	809837	LTR/Gypsy#Gypsy59-I_AG	14.7	+	2158
ARIC00008	819822	820018	DNA/MULE-MuDR#rnd-5_family-1620	18.5	-	5
ARIC00008	820366	820561	LINE#rnd-5_family-1621	20.4	-	0
ARIC00008	824714	824750	DNA/Maverick#Polinton-1_PBa	8.1	-	40
ARIC00008	827793	827826	LINE/L2#Crack-1_IS	8.8	-	82
ARIC00008	837586	837660	LTR/Pao#BEL-175_AA-I	28	-	101
ARIC00008	847853	847922	LTR/Gypsy#Gypsy-34_NVi-I	22.4	-	1
ARIC00008	937740	937804	LTR/Pao#BEL3-LTR_AP	16.1	-	14
ARIC00008	985125	985187	DNA/TcMar-Tc1#Tc14_Av	22.2	+	102
ARIC00008	996894	996939	LTR/Gypsy#Gypsy-8_PPc-I	15.2	-	203
ARIC00008	999748	999798	LINE/I-Jockey#G_DM	27.4	-	90
ARIC00009	16935	16997	DNA/hAT-Ac#rnd-5_family-929	23.8	-	13
ARIC00009	17186	17206	LTR/Gypsy#Gypsy10-I_AG	8.9	-	29
ARIC00009	17207	17249	LTR/Gypsy#Gypsy6-NVi_LTR	11.6	+	29
ARIC00009	46759	46817	LTR/Gypsy#Gypsy-8_ACe-LTR	27.1	+	4
ARIC00009	46818	46840	LTR/Pao#rnd-5_family-2230	21.7	+	4
ARIC00009	119672	119726	LTR/Gypsy#Gypsy-22_RPr-I	13.2	-	568
ARIC00009	166254	166334	DNA/Maverick#Polinton-3_PBa	23.4	-	0
ARIC00009	181104	181167	LINE/L2#Daphne-19_HRo	23.4	+	0
ARIC00009	181131	181198	DNA/CMC-EnSpm#CACTA6_Av	19.1	+	0
ARIC00009	198879	198964	LTR/Gypsy#rnd-5_family-2108	17.9	+	24
ARIC00009	201645	201707	LINE/I-Jockey#Ag-Jock-1	22.2	-	6
ARIC00009	204161	204184	DNA/Maverick#Polinton-1_ACe	27	+	0
ARIC00009	204185	204206	LINE/L2#Daphne-7_HMM	34	-	0
ARIC00009	210541	210644	DNA/Dada#rnd-5_family-636	12	-	477
ARIC00009	210561	210660	DNA#DNA6-8_CGi	19.7	+	470
ARIC00009	211455	211576	DNA/Maverick#Polinton-1_CGi	16.7	-	202
ARIC00009	216562	216625	LINE/L2#Daphne-17_HRo	26.6	+	95
ARIC00009	218141	218157	LTR/Gypsy#Gypsy-35_CGi-I	26.2	-	281
ARIC00009	223541	223648	LTR/ERV1#rnd-5_family-199	31.5	+	18
ARIC00009	234528	234603	LTR/Gypsy#Gypsy-42_DEl-I	19.7	-	0
ARIC00009	237044	237100	LTR/Pao#BEL-228_AA-I	22.8	+	10
ARIC00009	244181	244324	LTR/Pao#rnd-6_family-1773	29.2	-	89
ARIC00009	245842	245886	PLE/Penelope-Athena#AthW1	11.6	+	57
ARIC00009	274005	274038	LTR/Gypsy#Gypsy-11_DBi-I	11.8	+	68
ARIC00009	285591	285659	LTR/Copia#Copia-3_MMa-I	22.4	-	271
ARIC00009	298382	298460	DNA/MULE-MuDR?#MuDR-N1_LMi	20.5	+	2
ARIC00009	299840	299939	DNA/Sola-1#Sola1-1_AC	33	-	3
ARIC00009	299892	299938	LTR/Gypsy#Gypsy-22_DWil-I	19.1	-	3
ARIC00009	300206	300251	LINE/I-Jockey#Jockey-5_DVi	15.2	-	13
ARIC00009	300268	300280	PLE/Penelope-Athena#AthW2-1	22.4	+	7
ARIC00009	304476	304548	LINE/L2#L2-8_NVi	21.9	+	0
ARIC00009	306347	306410	DNA/Crypton-A#Crypton-7_CGi	20.3	-	1
ARIC00009	314416	314496	DNA/TcMar-Pogo#pogo13_Av	32.1	-	2
ARIC00009	359363	359412	LINE/I-Jockey#Jockey-5_DVi	18	+	113
ARIC00009	392375	392440	LTR/Pao#BEL-155_AA-LTR	27.7	+	0
ARIC00009	412882	412912	DNA/P#Galileo_DM	6.5	-	4
ARIC00009	415649	415694	LINE/CR1#CR1-14_HRo	10.9	+	49
ARIC00009	425244	425278	LTR/Pao#BEL-6_DPe-I	14.3	+	53
ARIC00009	435072	435277	LTR/Unknown#ltr-1_family-6	8.2	-	3
ARIC00009	435278	435369	DNA/RC#rnd-1_family-129	7.5	-	4
ARIC00009	435359	436102	DNA/RC#Heli3a_Av	19.1	-	6
ARIC00009	463620	463675	LTR/Pao#rnd-5_family-859	19.6	+	9
ARIC00009	465596	465642	PLE/Penelope-Athena#AthQ	13.7	-	0
ARIC00009	481911	481957	LINE/CR1#CR1-2_LSal	19.1	+	0
ARIC00009	502397	502436	LTR/Pao#BEL-289_AA-I	15	+	0
ARIC00009	506713	506764	LINE/L1#L1-12_LSal	17.3	-	1
ARIC00009	535341	535407	LTR/Gypsy#Gypsy10-I_AG	16.4	+	7
ARIC00009	535370	535446	DNA/RC#Helitron-N1_PBa	23.7	+	56
ARIC00009	542026	542054	LINE/I-Jockey#Jockey-6_DK	22.7	-	96
ARIC00009	542079	542209	LINE/R1#RTAg4	28.2	-	130
ARIC00009	553433	553563	DNA#DNA8-10_CGi	21.4	-	5
ARIC00009	565824	565888	DNA/hAT-Charlie#hAT-2_RPr	21.9	-	5
ARIC00009	575777	575847	LTR/Pao#BEL-20_AG-I	17.4	+	342
ARIC00009	599352	599417	PLE/Penelope-Athena#AthW2-1	14.8	-	0
ARIC00009	623563	624873	DNA/TcMar-Tc1#Tc21_Av	31.3	-	485
ARIC00009	650072	650116	LINE/I#I-7B_AAe	17.8	-	20
ARIC00009	697787	698095	DNA/hAT#hAT31_Av	31.4	+	103
ARIC00009	717008	717068	LINE/L1#rnd-5_family-2546	18	-	231
ARIC00009	743752	743813	LINE/L2#Daphne-38_HRo	22.6	-	112
ARIC00009	743777	743849	LTR/Gypsy#Gypsy-43_DWil-I	20.6	+	115
ARIC00009	798877	798909	DNA/Kolobok-T2#REP-4_PBa	12.1	+	18
ARIC00009	811239	811310	LTR/Gypsy#rnd-5_family-130	18.3	+	20
ARIC00009	814022	814069	LTR/Gypsy#Gypsy-11_DEl-I	22.9	-	10
ARIC00009	814188	814228	LTR/Gypsy#rnd-5_family-130	12.2	+	15
ARIC00009	816068	824523	SINE?#rnd-5_family-4379	19.544	+	4502
ARIC00009	819106	819181	DNA/hAT-Tip100#hAT-15_HRo	25	+	31
ARIC00009	819131	819190	LTR/Gypsy#Gypsy-9_ACe-LTR	19.4	-	28
ARIC00009	828402	828474	LTR/Gypsy#Gypsy68-I_AG	21.1	+	17
ARIC00009	835730	835767	LTR/Pao#BEL-641_AA-I	15.8	+	6
ARIC00009	871153	871190	LINE/L1#rnd-5_family-2546	5.3	+	27
ARIC00009	873618	873691	PLE/Penelope-Athena#AthW1-J-R	23	-	64
ARIC00009	881552	881595	DNA/CMC-Chapaev-3#EnSpm-1_LMi	18.2	-	53
ARIC00009	890794	890879	DNA#rnd-5_family-4923	21.4	+	6
ARIC00009	940573	940675	DNA/TcMar-Tc1#rnd-5_family-112	21.6	-	3
ARIC00009	962984	963071	DNA/Maverick#Polinton-8_NVi	26.4	+	5
ARIC00009	970228	970303	LTR/Gypsy#Gypsy-38_DWil-I	19.2	+	739
ARIC00009	981264	981342	LTR/Gypsy#rnd-6_family-954	17.4	+	3
ARIC00009	996012	996665	LINE/Soliton#Soliton1_Av	33.5	-	6
ARIC00009	996718	997320	DNA/RC#Heli3a_Av	20.3	+	0
ARIC00010	34640	34717	LINE/RTE-X#RTEX-10_CGi	21	+	16
ARIC00010	56127	56230	LINE/I-Jockey#TART_DV	13.8	+	43
ARIC00010	58306	58351	LINE/I-Jockey#Jockey-3_DGri	15.2	+	25
ARIC00010	97699	97752	DNA/Crypton#Crypton-1_CTe	20.4	+	857
ARIC00010	119117	119193	DNA/Maverick#Polinton-9_NVi	19.7	-	80
ARIC00010	146072	146171	DNA/PIF-Spy#ISL2EU-6_CGi	23.2	-	0
ARIC00010	168985	169050	LTR/Gypsy#Gypsy-16_LH-I	13.1	+	9
ARIC00010	181071	181128	LTR/Pao#BEL-4_CGi-I	18.2	+	28
ARIC00010	194185	194279	DNA/hAT-Ac#rnd-6_family-3575	31.6	-	42
ARIC00010	197692	197761	DNA/hAT-Tip100#hAT-30_LSal	22.1	+	1
ARIC00010	208243	208302	LINE/R1#R7Ag2	17.6	-	88
ARIC00010	229200	229240	LTR/Gypsy#Gypsy-19_RP-I	12.2	+	138
ARIC00010	257980	258974	DNA/TcMar-Tc1#Tc15_Av	20.269	-	36
ARIC00010	260014	260124	LTR/Gypsy#rnd-5_family-300	19.1	-	0
ARIC00010	260588	261072	DNA/CMC-EnSpm#CACTA8_Av	26.162	-	3
ARIC00010	272168	272222	PLE/Penelope-Athena#AthJ-W	14.8	+	26
ARIC00010	286064	286162	LINE/L2#Daphne-3_CTe	19.6	-	141
ARIC00010	290885	290932	LTR/DIRS#DIRS-2_DPu	18.8	+	144
ARIC00010	304438	304488	LINE/CR1#CR1-7_AG	21.6	-	27
ARIC00010	309500	311937	DNA/PIF-Harbinger#Harbinger1_Av	31.834	-	105
ARIC00010	369429	369468	LTR/Copia#Copia-1_DBp-I	15	+	129
ARIC00010	383865	383936	DNA/TcMar-Pogo#Mariner-10_CGi	15.5	-	2
ARIC00010	396476	396514	LINE/L2#Crack-20_AAe	13.2	-	699
ARIC00010	399005	399100	DNA/Dada#rnd-5_family-636	22.9	-	57
ARIC00010	400010	400095	DNA/hAT-Ac#rnd-5_family-929	27.4	-	41
ARIC00010	400013	400107	LTR/ERV1#rnd-5_family-199	31.6	+	46
ARIC00010	409454	409635	DNA/RC#Heli3a_Av	23.8	-	1
ARIC00010	409801	410349	DNA/P#P3_Av	20.7	+	8
ARIC00010	430393	430462	LINE/I#I-57_AAe	22.9	-	15
ARIC00010	440570	440613	LINE/RTE-RTE#RTE-7_Hmel	20.4	+	467
ARIC00010	483669	483730	DNA/PiggyBac#piggyBac-5_CGi	17.7	+	26
ARIC00010	490720	490758	LTR/Gypsy#Gypsy-13_CFl-I	15.4	-	13
ARIC00010	512266	512471	LTR/Unknown#ltr-1_family-6	5.3	+	5
ARIC00010	514786	514949	LTR/Unknown#ltr-1_family-6	17.9	+	4
ARIC00010	527684	527738	LTR/Gypsy#Gypsy-19_SI-I	17.3	-	5455
ARIC00010	527708	527755	LTR/Gypsy#Gypsy55-I_AG	22.9	+	5958
ARIC00010	532341	532371	LTR/Copia#Copia-28_DPu-I	6.5	+	35
ARIC00010	542747	542834	LTR/Gypsy#Gypsy-6_ACe-I	23.9	+	11
ARIC00010	576056	576224	LINE/I-Jockey#TART_DV	15.9	-	37
ARIC00010	592692	592892	DNA/RC#Heli3a_Av	22	+	2
ARIC00010	665998	666061	LTR/Gypsy#Gypsy1-I_DM	20.3	+	159
ARIC00010	726336	726395	PLE/Penelope-Athena#AthK-V	17.2	+	9
ARIC00010	751792	751860	LINE/I-Jockey#TART_DV	26.1	+	0
ARIC00010	767429	767467	DNA/Maverick#Polinton-2_DEu	10.5	+	61
ARIC00010	854176	854234	LINE/R1#TRAS3_BM	10.2	-	383
ARIC00010	889297	889348	DNA/Maverick#Polinton-9_NVi	21.1	+	1
ARIC00010	889313	889378	DNA/hAT-Ac#DNA8-2C_CGi	24.2	+	1
ARIC00010	919698	919746	LINE/I-Jockey#HeT-A3_DVi	14.3	-	0
ARIC00010	922052	922108	LINE/I#Nimb-1_LG	20	-	4
ARIC00011	457	970	DNA/RC#Heli1_Av	25.4	-	1
ARIC00011	9116	9222	LINE/RTE-BovB#RTE_BovB_Av	30.2	-	6
ARIC00011	13936	17108	LINE/RTE#RTE1_Av	12.2	-	36
ARIC00011	41662	41776	LTR/Gypsy#Gypsy-31_DEl-I	31.3	-	77
ARIC00011	41684	41835	LINE/I-Jockey#Ag-Jock-1	22.1	-	74
ARIC00011	41901	41988	LINE/I-Jockey#Jockey-3_DGri	22.1	-	47
ARIC00011	41990	42010	LINE/R1#MinoAg1	17.9	-	53
ARIC00011	54395	54435	LINE/L2#L2B-4B_AAe	14.6	-	0
ARIC00011	55845	55920	LINE/L2#L2-10_Hmel	9.7	-	54
ARIC00011	86907	86991	DNA/Crypton-A#Crypton-7_CGi	24.1	-	6
ARIC00011	156983	157028	DNA/Crypton#Crypton-1_CTe	17.4	-	143
ARIC00011	156985	157067	DNA/Dada#rnd-5_family-636	19.2	-	182
ARIC00011	157015	157034	PLE/Penelope#Penelope-5_HRo	23.3	-	145
ARIC00011	187434	187500	LTR/Pao#BEL-3_DEl-I	18.7	-	116
ARIC00011	231253	231359	PLE/Penelope#Penelope-5_HRo	21.2	+	4
ARIC00011	231293	231364	LTR/Gypsy#Gypsy3-LTR_AP	19.7	-	4
ARIC00011	231523	231593	DNA/Dada#rnd-5_family-636	8.8	+	10
ARIC00011	255209	255255	LTR/Copia#Copia-19_DPu-I	6.7	-	60
ARIC00011	259785	259831	LTR/Copia#Copia-19_DPu-I	6.7	-	2
ARIC00011	262277	262323	LTR/Gypsy#Gypsy-4_PPc-I	21.3	+	1476
ARIC00011	309471	309541	DNA/Ginger#Ginger1-1_AC	15.5	+	4
ARIC00011	332149	332188	LTR/Gypsy#Gypsy-216_AA-I	12.5	-	0
ARIC00011	333892	333926	SINE?#rnd-4_family-826	14.3	-	847
ARIC00011	347232	347283	LTR/Pao#BEL-132_AA-I	17.7	-	130
ARIC00011	348542	348621	DNA/RC#Helitron-N1_PBa	19	-	38
ARIC00011	366372	366523	LTR/Gypsy#Gypsy68-I_AG	24.7	-	0
ARIC00011	386385	386442	LINE/L1-Tx1#Tx1-5_CGi	12.7	+	31
ARIC00011	390819	390879	LTR/Gypsy#Gypsy-101_AA-I	15	+	10
ARIC00011	407416	407495	DNA/hAT-hATm#hAT-N11B_LSal	22.4	-	9
ARIC00011	476625	476736	LTR/Gypsy#rnd-6_family-954	24.3	+	0
ARIC00011	518552	518613	LINE/R2-NeSL#NeSL-4_CRem	22.6	+	730
ARIC00011	529838	529908	LTR/ERV1#rnd-5_family-199	21.7	+	3529
ARIC00011	544860	545011	DNA/PIF-Spy#ISL2EU-N1_CGi	24.8	-	182
ARIC00011	604410	604462	PLE/Penelope-Athena#AthX-V-T	17.3	+	48
ARIC00011	608422	608478	LINE/I#Nimb-1_AAe	21.9	-	221
ARIC00011	615682	615727	DNA/Crypton#Crypton-1_CTe	17.4	-	162
ARIC00011	615685	615736	DNA/RC#Helitron-9_CGi	23.1	-	170
ARIC00011	631320	631376	PLE/Penelope-Athena#AthJ-W	12.7	-	2
ARIC00011	643497	643578	LTR/Gypsy#rnd-5_family-130	29.3	-	76
ARIC00011	689637	689733	PLE/Penelope-Athena#AthV-L1	24.7	-	1337
ARIC00011	689721	689733	LINE/I-Jockey#TART_DV	28.8	-	1264
ARIC00011	696388	696446	PLE/Penelope-Athena#AthQ	16.9	-	44
ARIC00011	731125	731916	PLE/Penelope-Athena#AthJ-N-W1	14.605	-	0
ARIC00011	769803	769863	LTR/Gypsy#Gypsy-1_AC-I	23.8	-	8
ARIC00011	778151	778188	DNA/TcMar-Mariner#Mariner-11_ACe	10.5	-	202
ARIC00011	793071	793124	LTR/Gypsy#Gypsy-35_CGi-I	24.1	-	154
ARIC00011	816422	816610	LINE/I-Jockey#Ag-Jock-1	26.9	+	622
ARIC00011	816484	816628	LINE/R1#RTAg4	33.1	+	551
ARIC00011	830632	830708	LINE/I-Jockey#TART_DV	16.3	+	84
ARIC00011	830660	830732	LTR/Pao#BEL-4_DFi-I	24	-	80
ARIC00011	830709	830724	DNA/Maverick#Polinton-2_PBa	19.3	+	43
ARIC00011	874209	874262	LTR/Pao#BEL10-I_AG	16.7	+	70
ARIC00011	881304	881357	LTR/Gypsy#Gypsy-55_CGi-I	20.4	-	29
ARIC00011	908954	909004	LTR/Gypsy#BLOOD_LTR	14.3	-	0
ARIC00012	5729	29936	DNA/RC#rnd-6_family-3519	21.668	-	24345
ARIC00012	6284	6404	DNA/RC#rnd-6_family-3519	6	-	4
ARIC00012	27013	27054	LTR/Gypsy#Gypsy-35_CGi-I	19.1	-	42
ARIC00012	55047	55266	DNA/hAT-Ac#rnd-6_family-3575	26.5	+	63
ARIC00012	69765	69806	LTR/Gypsy#Gypsy-174_AA-LTR	14.3	+	0
ARIC00012	95009	95107	PLE/Penelope#Penelope-83_LMi	30.9	-	253
ARIC00012	95086	95110	LTR/Gypsy#Gypsy-6_AEc-I	26.1	-	34
ARIC00012	95111	95164	DNA/Kolobok-T2#Kolobok-2_AP	24.1	+	27
ARIC00012	106238	106308	LTR/Gypsy#Gypsy-55_CGi-I	22.1	+	151
ARIC00012	125979	126035	DNA/IS3EU#IS3EU-N1_CGi	22.8	-	5
ARIC00012	127918	127979	LINE/I-Jockey#HeT-A3_DVi	18.3	+	208
ARIC00012	135222	135258	DNA/Maverick#Polinton-8_NVi	18.9	-	97
ARIC00012	141849	141910	PLE/Penelope-Athena#AthW	13.9	-	29
ARIC00012	142817	142867	DNA#DNA3-14_CGi	15.7	-	32
ARIC00012	175573	175639	PLE/Penelope#Penelope-6_HRo	17.9	+	7
ARIC00012	177375	177439	LTR/Gypsy#rnd-6_family-954	18.5	+	4
ARIC00012	228156	228407	SINE?#rnd-5_family-4379	29.9	-	8
ARIC00012	232883	232950	LTR/Gypsy#rnd-5_family-130	22.1	-	5
ARIC00012	255438	255493	LTR/Pao#BEL-645_AA-I	21.8	-	2
ARIC00012	286577	286620	LTR/Gypsy#Gypsy-164_AA-I	15.9	+	40
ARIC00012	301624	301667	DNA/hAT-Blackjack#hAT-4_PBa	22.7	+	87
ARIC00012	304491	304542	LINE/L2#L2-8_NVi	15.4	+	85
ARIC00012	304497	304545	LINE/CR1#CR1-16_HRo	16.3	+	77
ARIC00012	304543	304572	DNA/hAT-Tip100#hAT-15_HRo	21.5	-	46
ARIC00012	307801	307878	DNA/hAT-Ac#rnd-5_family-929	18.9	-	0
ARIC00012	307822	307879	DNA/hAT-Ac#rnd-5_family-2953	20.1	+	0
ARIC00012	327156	327195	LINE/R1#WaldoFs1	15	+	12
ARIC00012	327448	327507	LTR/ERV1#rnd-5_family-199	20.3	+	1
ARIC00012	367985	368038	LTR/Gypsy#Gypsy-218_AA-I	13.4	-	0
ARIC00012	400135	400205	DNA/Maverick#Polinton-4_PBa	25.4	+	177
ARIC00012	409591	409635	DNA/CMC-EnSpm#EnSpm4_Av	13.3	-	6
ARIC00012	440340	440354	LINE/CR1#CR1_Ele9	24.4	-	3623
ARIC00012	472244	472335	LINE/L2#L2-5_CTe	15.5	+	122
ARIC00012	476872	476921	LTR/Gypsy#Gypsy-609_AA-I	18	-	12
ARIC00012	506782	507687	DNA/hAT-Ac#rnd-5_family-2953	21.575	+	665
ARIC00012	514109	514158	LTR/Pao#BEL-3_DVir-I	18.8	-	72
ARIC00012	577355	577413	LINE/L2#rnd-5_family-1522	20.7	-	13
ARIC00012	583789	583831	LTR/Gypsy#Gypsy-1_NG-I	13.9	-	20
ARIC00012	627227	627998	LTR/Ngaro#rnd-5_family-1935	28.223	+	302
ARIC00012	628498	628700	LTR/Ngaro#rnd-5_family-1935	24.8	+	90
ARIC00012	629558	629837	LTR/Ngaro#rnd-5_family-1935	27.4	-	39
ARIC00012	630305	630473	LTR/Ngaro#rnd-5_family-1935	30.3	-	28
ARIC00012	666138	666187	DNA/RC#Helitron-9_CGi	16	+	18
ARIC00012	686923	686975	LINE/I#I-14_AAe	26.4	+	1
ARIC00012	723984	724057	LTR/Gypsy#rnd-6_family-954	19.2	+	5
ARIC00012	748007	748058	LINE/I-Jockey#TART_DV	25	+	731
ARIC00012	773942	773997	LINE/I-Jockey#HeT-A3_DVi	17.9	+	5
ARIC00012	816525	816605	DNA/Dada#rnd-5_family-636	20.3	+	0
ARIC00012	830124	830174	LTR/Gypsy#Gypsy37-I_AG	21.6	-	447
ARIC00012	863494	863559	LINE/R1#Waldo-1_AAe	23.1	+	10
ARIC00013	24122	36337	DNA/hAT-Ac#rnd-5_family-929	2.8	-	5487
ARIC00013	46630	46687	LTR/Pao#rnd-5_family-2230	14.6	-	15
ARIC00013	48236	48285	LTR/Gypsy#Gypsy-237_AA-I	16.3	-	8
ARIC00013	89152	89191	LINE/R1-LOA#LOA-9_AAe	7.7	+	175
ARIC00013	123635	123727	DNA/Zisupton#rnd-4_family-860	22.8	+	2
ARIC00013	126434	126467	LINE/RTE-RTE#RTE-11_HMM	8.8	-	68
ARIC00013	131938	131980	LTR/Gypsy#Gypsy-7_CQ-I	18.6	+	52
ARIC00013	146402	146653	LINE/R1#RTAg4	34.1	+	25
ARIC00013	165107	165172	DNA/Crypton#Crypton-1_CTe	16.3	-	795
ARIC00013	166420	197738	LINE/L2#rnd-5_family-1522	2.5	+	89763
ARIC00013	208973	209073	PLE/Penelope#Penelope-71_LMi	23.4	+	1258
ARIC00013	216238	216702	DNA/hAT#hAT27_Av	31.5	+	3
ARIC00013	243346	244475	LINE/L2#rnd-5_family-1522	27.138	-	141
ARIC00013	303158	303226	LTR/Pao#BEL6-I_AG	19.7	+	60
ARIC00013	307365	307457	DNA/hAT-Ac#Homo10	21.1	-	7
ARIC00013	333306	333406	LTR/ERV1#rnd-5_family-1703	31.7	-	93
ARIC00013	374993	375037	LTR/Pao#BEL-273_AA-I	20	+	1215
ARIC00013	394842	396529	DNA/Ginger#Ginger2a_Av	15.349	+	1872
ARIC00013	414513	414563	DNA/Maverick#Polinton-2_ACe	23.5	-	292
ARIC00013	417654	417725	DNA/Sola-1#Sola1-1_CTe	23.9	+	771
ARIC00013	417928	417977	LTR/Gypsy#Gypsy-604_AA-I	22	-	1337
ARIC00013	425128	425189	DNA/Maverick#Polinton-2_RPr	25.8	-	84
ARIC00013	434794	434863	DNA/hAT-hATm#hATm-5_HRo	24.3	+	2109
ARIC00013	437864	438034	DNA/MULE-MuDR#MULE2_Av	22.2	+	0
ARIC00013	441029	441080	LTR/ERV1#rnd-5_family-199	25	-	120
ARIC00013	469524	469570	PLE/Penelope-Athena#AthW2-2	13.1	-	145
ARIC00013	469552	469575	DNA/hAT-Ac#rnd-5_family-929	21.4	+	128
ARIC00013	478986	479043	DNA/P#P-2_PBa	17.9	-	1208
ARIC00013	506436	506517	DNA/Dada#rnd-5_family-636	25.9	+	48
ARIC00013	534015	534060	DNA/hAT-Ac#rnd-5_family-929	13.3	-	31
ARIC00013	597177	597223	DNA/TcMar-Fot1#Mariner-24_CGi	13.1	+	0
ARIC00013	617450	617489	LTR/Pao#BEL-83_AA-I	12.8	-	23
ARIC00013	620096	620344	LTR/ERV1#rnd-5_family-199	33.9	+	65
ARIC00013	621506	621553	LTR/Gypsy#Gypsy-26_DPse-I	15.6	+	2
ARIC00013	628928	628984	LINE/R2#NeSL-1	14	+	156
ARIC00013	650075	650159	LTR/TelKA#TelKA1_Av	23.2	-	1
ARIC00013	670391	670598	LINE/RTE#RTE2a_Av	23.2	-	8
ARIC00013	694068	694121	DNA#rnd-5_family-4923	8	-	252
ARIC00013	724878	725050	DNA/TcMar-Tc1#Mariner-N19_LMi	27.8	-	0
ARIC00013	725058	725427	DNA/TcMar-Tc1#Tc2_Av	34.8	-	0
ARIC00013	730168	730428	DNA/PIF-Harbinger#Harbinger1_Av	32.7	+	35
ARIC00013	732525	732590	LTR/Gypsy#Gypsy-35_CGi-I	24.2	-	209
ARIC00013	733029	733093	LINE/I-Jockey#Jockey-6_DPer	20	+	269
ARIC00013	738956	739011	DNA/CMC-EnSpm#CACTA4_Av	13.2	+	84
ARIC00013	775539	775639	DNA/Crypton#Crypton-1_CTe	18.1	-	901
ARIC00013	788624	789584	PLE/Penelope-Athena#AthJ-N-W1	14.9	+	210
ARIC00013	795946	796486	LTR/Gypsy#Gypsy-43_DWil-I	21.9	-	10
ARIC00013	796870	797080	LTR/Gypsy#Gypsy-43_DWil-I	28.2	-	3
ARIC00013	798204	798385	DNA/TcMar-Mariner#Avmar6_Av	27.8	-	0
ARIC00013	799784	799952	DNA/TcMar-Mariner#Avmar11_Av	32.3	+	0
ARIC00013	801753	802976	DNA/TcMar-Mariner#rnd-5_family-1209	6.25	+	7
ARIC00013	862688	862749	DNA/TcMar-Mariner#Avmar8_Av	19.1	+	64
ARIC00013	878987	879076	LTR/Gypsy#Gypsy-7_DEl-I	22.6	-	463
ARIC00013	885613	885684	DNA/TcMar-Tigger#DNA-TA-7_AAe	13	+	32
ARIC00013	885913	886000	DNA/RC#Helitron-9_CGi	25	-	75
ARIC00013	886001	886014	LTR/Gypsy#Gypsy37-I_AG	26.2	-	44
ARIC00013	886695	886753	DNA/Kolobok-T2?#Kolobok-N1_AEc	23.7	+	14
ARIC00013	886715	886795	DNA/TcMar-Tc1#Mariner-62_HSal	27.5	-	12
ARIC00014	453	1207	LINE/Soliton#Soliton6b_Av	19.6	+	1
ARIC00014	5866	6265	DNA/RC#Heli3a_Av	20.4	+	0
ARIC00014	11415	11467	DNA/hAT-Charlie#hAT-9_HRo	13.5	+	68
ARIC00014	12880	12933	PLE/Penelope-Athena#AthK-V	24.1	-	190
ARIC00014	38689	38754	DNA/Maverick#Polinton-1_CB	16.9	+	597
ARIC00014	47402	47545	LINE/I-Jockey#rnd-5_family-704	20.4	-	2
ARIC00014	47700	49958	DNA/RC#Heli3a_Av	18.587	+	42
ARIC00014	108563	108624	DNA/hAT-Ac#rnd-5_family-2953	20.4	-	5
ARIC00014	115139	115712	DNA/PIF-Harbinger#Harbinger2_Av	32.059	-	6
ARIC00014	121141	121208	LINE/L2#L2-8_NVi	17.6	+	9
ARIC00014	121145	121218	DNA/Maverick#Polinton-1_NVi	18.6	-	8
ARIC00014	152290	152344	DNA/hAT-Ac#rnd-5_family-475	25.4	+	18
ARIC00014	196200	196278	LTR/Gypsy#Gypsy-8_ACe-LTR	26.6	-	417
ARIC00014	214588	214628	LINE/R1#R1-6_DK	19.5	-	67
ARIC00014	222687	222728	DNA/Zator#Zator-3_CGi	14.3	+	95
ARIC00014	227509	227551	LINE/CRE#CRE-2_HRo	4.8	-	8
ARIC00014	288951	288996	LINE/L2#Daphne-52_LMi	15.6	+	66
ARIC00014	317581	317630	DNA/TcMar-Tc4#Mariner3-3_HSal	20	-	24
ARIC00014	349887	349939	LTR/Gypsy#Gypsy-41_DEl-I	22.6	-	2
ARIC00014	351192	351231	PLE/Penelope#Penelope-5_HRo	0	+	2
ARIC00014	351199	351244	PLE/Penelope-Athena#AthW1-J-R	17.4	-	2
ARIC00014	351232	351242	LTR/Gypsy#Gypsy3-LTR_AP	21.6	-	2
ARIC00014	402339	405041	LINE/I-Jockey#rnd-5_family-704	6.963	-	1089
ARIC00014	405041	407388	LINE/I-Jockey#Hebe2_Av	11.4	-	17
ARIC00014	424184	424320	LINE/R1#RTAg4	30	-	21
ARIC00014	465938	465985	DNA/RC#Helitron-N2d_CGi	19.6	+	134
ARIC00014	474714	474763	LTR/Gypsy#Gypsy-29_DWil-I	10	-	38
ARIC00014	495398	495494	PLE/Penelope-Athena#AthV-L1	12.5	+	68
ARIC00014	496401	496441	LTR/Gypsy#Gypsy55-I_AG	14.6	+	22
ARIC00014	508857	508948	DNA/CMC-EnSpm#DNA3-1_CGi	23.9	+	216
ARIC00014	516016	516077	LTR/Gypsy#Gypsy-19_CQ-I	17.7	-	322
ARIC00014	528372	528425	DNA/MULE-MuDR#MULE5_Av	18.5	-	0
ARIC00014	533655	534683	DNA/RC#Heli3a_Av	21.692	-	1
ARIC00014	563952	564120	LTR/Unknown#ltr-1_family-4	34.2	+	4234
ARIC00014	568515	568550	DNA/Sola#Sola2d_Av	13.9	-	0
ARIC00014	584281	584337	LTR/Gypsy#rnd-5_family-2108	12.3	+	7
ARIC00014	613993	614030	LTR/Gypsy#Gypsy-34_AA-LTR	18.4	-	56
ARIC00014	652861	652928	LTR/Gypsy#rnd-5_family-130	19.1	-	36
ARIC00014	653935	654004	PLE/Penelope#Penelope-83_LMi	28.6	-	2607
ARIC00014	664779	664927	DNA/TcMar-Sagan#rnd-5_family-746	26.2	+	0
ARIC00014	688483	688535	DNA/Sola-2#Sola2-8_LMi	15.7	-	8
ARIC00014	689905	689987	DNA/hAT-Ac#rnd-5_family-929	22.9	+	0
ARIC00014	689921	690031	DNA#DNA8-10_CGi	27.5	+	0
ARIC00014	753016	753073	LTR/Pao#rnd-5_family-2230	7.4	+	172
ARIC00014	784477	784554	DNA/PIF-ISL2EU#ISL2EU-8_CGi	13.9	-	200
ARIC00014	826306	826355	LTR/Gypsy#Gypsy-12_CQ-I	10	+	53
ARIC00014	827323	827377	LTR/Pao#BEL-208_AA-I	24.1	-	131
ARIC00015	423	490	LINE/L2#Daphne-38_HRo	19.2	+	0
ARIC00015	55805	55869	LTR/ERV1#rnd-5_family-199	26.1	+	37
ARIC00015	83791	83863	PLE/Penelope#Penelope-83_LMi	26.4	-	9
ARIC00015	83804	83875	DNA/TcMar-Tc1#Mariner-17_AEc	20.3	-	9
ARIC00015	84381	84475	DNA/hAT-Ac#rnd-5_family-475	25	-	34
ARIC00015	150012	150045	DNA/TcMar-Mariner#Mariner-70_HSal	14.7	+	68
ARIC00015	153832	154084	LTR/Gypsy#Gypsy-39_CQ-I	38.4	+	4
ARIC00015	265155	265217	LINE/L1#L1_Ele28	14.3	-	96
ARIC00015	271529	271726	DNA/MULE-MuDR#rnd-5_family-1620	17	-	0
ARIC00015	272074	272271	LINE#rnd-5_family-1621	21.9	-	0
ARIC00015	318838	318884	DNA/Maverick#Polinton-7_NVi	21.3	-	49
ARIC00015	356029	356070	DNA/TcMar-Tc1#Mariner-62_HSal	19.1	+	7
ARIC00015	388975	389041	LTR/Pao#BEL3-LTR_AP	17.3	-	1
ARIC00015	422105	422186	LTR/Gypsy#Gypsy61-I_AG	26.6	-	108
ARIC00015	436257	436314	DNA/TcMar-Tc1#Tc14_Av	14	+	49
ARIC00015	439669	439726	PLE/Penelope-Athena#AthX-V-T	19	-	239
ARIC00015	450800	450850	LINE/I-Jockey#G_DM	27.4	-	157
ARIC00015	489519	489561	LTR/Gypsy#Gypsy37-I_AG	20.9	+	59
ARIC00015	490194	490239	LINE/I-Jockey#Jockey-2_DGri	14	-	8
ARIC00015	493781	493873	LTR/Gypsy#Gypsy61-I_AG	19.4	+	216
ARIC00015	499811	501149	LTR/Gypsy#Gypsy-50_CGi-I	16.564	+	711
ARIC00015	530391	530403	DNA/Crypton-V#CryptonV-1_HSal	25	+	24
ARIC00015	530404	530460	DNA/Kolobok-T2?#Kolobok-N1_AEc	21.1	+	25
ARIC00015	533343	533383	DNA/Maverick#Polinton-1_PBa	14.6	+	176
ARIC00015	535134	535168	LTR/Pao#BEL-614_AA-I	14.3	-	16
ARIC00015	536136	536173	LTR/Copia#Copia-1_AC-I	5.4	+	26
ARIC00015	564698	564746	DNA/PIF-Spy#ISL2EU-1_CFl	18.4	+	86
ARIC00015	568658	568730	LINE/I-Jockey#Ag-Jock-1	24	-	23
ARIC00015	570716	570781	DNA/TcMar-Tc1#DNA-7_LMi	20.7	-	246
ARIC00015	572701	572755	SINE/tRNA-Meta#HalSINE1	25.4	+	84
ARIC00015	572710	572759	DNA/Kolobok-T2#REP-4_PBa	22.5	+	84
ARIC00015	572760	572788	DNA#rnd-5_family-4923	25.4	-	82
ARIC00015	572934	573010	PLE/Penelope-Athena#AthL3	13.5	-	240
ARIC00015	573758	573820	LINE/L2#L2-13_Hmel	15.8	-	5
ARIC00015	575027	575129	DNA/hAT-Tip100#hAT-15_HRo	17.2	-	2
ARIC00015	590971	591051	DNA#DNA2-10_CGi	20	-	16
ARIC00015	590983	591076	DNA#DNA-11_CGi	20.6	+	18
ARIC00015	591037	591192	LTR/ERV1#rnd-5_family-199	30	+	31
ARIC00015	696091	696179	LINE/I#I-72_AAe	26.4	+	613
ARIC00015	708049	708063	LTR/Gypsy#Gypsy-8_ACe-LTR	15.3	-	69
ARIC00015	709500	709550	LINE/I-Jockey#UVIR_DV	10.2	+	4
ARIC00015	709688	709750	DNA/Crypton#Crypton-1_CTe	20.6	+	5
ARIC00015	710767	710831	LINE/L2#Kiri-13_HMM	20.6	-	24
ARIC00015	781497	781644	LTR/Unknown#ltr-1_family-6	7	+	3
ARIC00015	783870	784088	DNA/RC#Heli3a_Av	19.8	+	20
ARIC00015	785039	785049	SINE?#rnd-5_family-4379	18.7	+	6
ARIC00015	785766	785782	PLE/Penelope-Athena#AthQ	17.5	-	0
ARIC00015	799233	799285	PLE/Penelope#Penelope-51_LMi	15.1	+	10
ARIC00015	799249	799296	DNA/TcMar-Tc1#Mariner-17_AEc	12.5	+	12
ARIC00015	799286	799296	DNA/Sola-1#Sola1-1_AC	17.6	-	12
ARIC00015	817040	817106	PLE/Penelope#Penelope-1_SIn	22.4	+	0
ARIC00015	820150	820219	LTR/Pao#BEL-21_DWil-I	18.2	-	2
ARIC00016	22528	22577	LINE/R2#R2-1_PCau	13.1	-	0
ARIC00016	26105	26140	LTR/Gypsy#Gypsy-208_AA-I	13.9	-	507
ARIC00016	68682	68903	LINE/I-Jockey#TART_DV	30.9	+	667
ARIC00016	75551	75593	LINE/R1#R1_DMo	14.7	+	6
ARIC00016	110120	110198	DNA/hAT-hATm#NAVIHAT1	23	+	12
ARIC00016	113542	113559	LTR/Gypsy#Gypsy61-I_AG	29.2	+	96
ARIC00016	115147	115193	LTR/Pao#BEL-70_AA-I	20.6	+	26
ARIC00016	116460	116538	DNA/TcMar-Pogo#pogo12_Av	19.8	+	5
ARIC00016	118815	118863	DNA/Kolobok-T2?#Kolobok-N1_AEc	16.3	-	148
ARIC00016	125803	125885	DNA/RC#Helitron-like-13_Hmel	14.5	+	5
ARIC00016	131964	132044	LTR/Gypsy#Gypsy-31_DEl-I	26.2	-	21
ARIC00016	137678	137715	LINE/I-Jockey#Jockey-2_DVi	7.9	+	223
ARIC00016	156122	156186	PLE/Penelope-Athena#AthW2-1	23.4	+	884
ARIC00016	187009	187051	DNA/hAT-Tip100#hAT-N17B_LSal	16.3	-	2
ARIC00016	198677	198722	LTR/Pao#rnd-5_family-859	15.6	-	26
ARIC00016	224021	224060	LTR/Gypsy#Gypsy-6_MMa-LTR	10	+	1
ARIC00016	224296	224350	PLE/Penelope-Athena#AthJ-N	16.4	+	0
ARIC00016	247518	247569	DNA/Crypton-V#CryptonV-1_CGi	14.3	+	77
ARIC00016	252146	252308	LTR/Pao#rnd-5_family-859	24.9	-	63
ARIC00016	259134	259197	LINE/R1#SART-1_LHu	26.6	+	599
ARIC00016	322722	322768	LINE/R1-LOA#Loa-1_LMi	21.3	+	50
ARIC00016	346566	346606	LTR/Gypsy#Gypsy-16_CT-I	17.1	-	0
ARIC00016	374839	374913	DNA/Sola#Sola2e_Av	24.3	-	68
ARIC00016	375858	375923	PLE/Penelope-Athena#AthW2-1	20	+	122
ARIC00016	375895	375949	LINE/L2#Daphne-19_HRo	13.5	+	157
ARIC00016	433819	433864	PLE/Penelope#Penelope-83_LMi	15.2	-	27
ARIC00016	436922	436977	DNA/Kolobok-T2#Kolobok-2_AP	23.6	-	5
ARIC00016	521256	521302	LINE/R1#SART-4_MOc	19.6	+	184
ARIC00016	548007	548072	DNA/CMC-EnSpm#DNA3-1_CGi	22.6	-	56
ARIC00016	548073	548127	DNA/Maverick#Polinton-8_NVi	11.1	-	182
ARIC00016	558848	558922	LTR/Gypsy#Gypsy-1_AC-I	27.9	+	8
ARIC00016	566174	566233	LINE/L2#Crack-33_AAe	16.1	+	450
ARIC00016	604483	604525	LINE/CR1#CR1-98_AAe	11.9	+	17
ARIC00016	616269	633372	LINE/L2#rnd-5_family-1522	23.352	+	207
ARIC00016	618359	619375	DNA/MULE-MuDR#rnd-5_family-3876	4	+	24
ARIC00016	623829	624376	DNA/hAT#hAT27_Av	32.4	-	7
ARIC00016	625175	625363	LTR/Unknown#ltr-1_family-20	6.3	+	0
ARIC00016	683920	683960	PLE/Penelope-Athena#AthK-V	12.2	+	30
ARIC00016	683929	683965	LINE/L2#CR1-1_AG	10.8	+	29
ARIC00016	683938	683971	PLE/Penelope-Athena#AthW2-2	8.8	+	26
ARIC00016	754373	754415	LINE/CR1#CR1-24_CQ	9.8	-	44
ARIC00017	17624	17656	LINE/Dong-R4#R4-1_CJap	15.2	+	6
ARIC00017	21357	21400	DNA/Maverick#Polinton-2_RPr	15.9	+	10
ARIC00017	21375	21413	DNA/Maverick#Polinton-8_NVi	10.3	-	8
ARIC00017	47071	47132	LINE/R1#RT1	21	-	3
ARIC00017	61752	61797	PLE/Penelope-Athena#AthX-V-T	13	+	0
ARIC00017	118902	118982	LTR/ERV1#rnd-5_family-1703	22.1	-	1
ARIC00017	118949	118995	DNA/RC#rnd-6_family-3519	19.1	+	1
ARIC00017	138225	138315	DNA/hAT-Ac#DNA8-3_CGi	26.8	-	38
ARIC00017	171668	174036	DNA/hAT#hAT31_Av	21.6	+	12
ARIC00017	193440	193483	DNA/PiggyBac#piggyBac-2_HRo	13.6	-	58
ARIC00017	194796	194849	DNA/hAT-Charlie#AeBuster1	18.5	+	7
ARIC00017	204555	204969	DNA/PiggyBac#piggyBac6_Av	26.7	+	1
ARIC00017	227690	227770	LTR/Copia#Copia-9_SI-LTR	14.5	-	7
ARIC00017	232181	232244	PLE/Penelope-Athena#AthW	17.7	-	2
ARIC00017	232791	234379	SINE?#rnd-4_family-826	19.944	+	69
ARIC00017	233481	233517	LTR/Gypsy#Gypsy-74_AA-I	13.5	+	0
ARIC00017	235088	235630	SINE?#rnd-4_family-826	14.989	+	28
ARIC00017	235944	236270	SINE?#rnd-4_family-826	7.454	+	12
ARIC00017	238404	239687	SINE?#rnd-4_family-826	15.087	+	5
ARIC00017	247172	247238	LTR/Pao#BEL-9_DWil-I	12	+	0
ARIC00017	257405	257466	LINE/L1#rnd-5_family-2546	22.6	-	154
ARIC00017	316153	317744	DNA/Crypton#Crypton_Av	17.429	+	326
ARIC00017	319536	319804	DNA/MULE-MuDR#rnd-5_family-3876	23.1	+	0
ARIC00017	392686	392759	DNA/Crypton#Crypton-1_CTe	16.4	-	10
ARIC00017	400002	417581	SINE?#rnd-4_family-826	3.2	+	4679
ARIC00017	420633	420686	LTR/Gypsy#Gypsy-21_LG-I	20.4	+	8
ARIC00017	491847	491917	LINE/L1-Tx1#L1-5_CQ	19.7	-	28
ARIC00017	545705	545744	LTR/Gypsy#Gypsy-157_AA-I	12.8	-	0
ARIC00017	547590	549584	LINE/Soliton#Soliton6_Av	32.065	+	76
ARIC00017	549719	551512	LINE/Soliton#Soliton6b_Av	30.9	+	6
ARIC00017	567193	567263	DNA/Dada#rnd-5_family-636	21.4	+	1303
ARIC00017	581236	581344	DNA/TcMar-Tc4#Mariner3-4_LMi	26	+	11
ARIC00017	589294	589325	LTR/Gypsy#Gypsy6-I_AG	12.5	+	29
ARIC00017	601497	602331	SINE?#rnd-5_family-4379	32.2	+	184
ARIC00017	611025	611398	DNA/hAT-Ac#rnd-1_family-8	27	-	2
ARIC00017	650058	650273	LTR/TelKA#TelKA3b_Av	20.6	-	4261
ARIC00017	693883	694134	DNA/hAT-Ac#rnd-1_family-3	21.8	+	1
ARIC00017	721949	721994	LINE/I#I-1_AA	19.6	-	4
ARIC00017	745495	749709	LINE/Soliton#Soliton5_Av	32.84	+	8
ARIC00018	6155	6359	LTR/Unknown#ltr-1_family-6	12.7	-	25
ARIC00018	18105	48179	LTR/Gypsy#rnd-5_family-2148	23.308	-	10149
ARIC00018	38757	38807	DNA/Crypton#Crypton-1_CTe	18.4	+	16
ARIC00018	58157	58217	DNA/TcMar-Tc1#Mariner-9_DAn	18	+	117
ARIC00018	66569	66638	LTR/Gypsy#Gypsy-38_DWil-I	20.9	+	172
ARIC00018	66570	66651	LTR/Gypsy#Gypsy61-I_AG	25.6	-	190
ARIC00018	68162	68309	LINE/I-Jockey#Ag-Jock-1	21	+	56
ARIC00018	69729	69756	LTR/Gypsy#Gypsy-195_AA-I	7.1	-	21
ARIC00018	83665	83870	LTR/Unknown#ltr-1_family-6	6.3	+	102
ARIC00018	83871	84653	LTR/Unknown#ltr-1_family-7	4.3	+	256
ARIC00018	84654	84859	LTR/Unknown#ltr-1_family-6	5.4	+	156
ARIC00018	132897	132913	LINE/R1#RTAg4	20.6	+	55
ARIC00018	132914	132954	DNA/Maverick#Polinton-2_ACe	14.6	+	66
ARIC00018	173148	173293	LTR/Pao#rnd-6_family-1773	20.6	+	13274
ARIC00018	173376	173521	LTR/Pao#rnd-6_family-1773	17.8	+	4287
ARIC00018	174406	174470	LTR/Pao#rnd-6_family-1773	18.5	+	979
ARIC00018	174553	174698	LTR/Pao#rnd-6_family-1773	17.8	+	3277
ARIC00018	174781	174920	LTR/Pao#rnd-6_family-1773	22.9	+	5537
ARIC00018	181989	182052	LINE/Soliton#Soliton1_Av	20.6	-	5133
ARIC00018	204201	204241	LTR/Gypsy#Gypsy-26_DPu-I	17.1	+	11
ARIC00018	229499	229611	LINE/I-Jockey#Jockey-3_DGri	26.6	-	284
ARIC00018	266325	266359	PLE/Penelope-Athena#AthW1-J-R	11.4	-	175
ARIC00018	268817	268855	DNA/hAT-hAT19#TE-1_LSal	12.8	+	32
ARIC00018	293355	294432	LINE/L1#rnd-5_family-8088	27.055	+	164
ARIC00018	298203	298253	LINE/I-Jockey#Jockey-6_DPer	13.7	-	0
ARIC00018	301763	301888	SINE?#rnd-5_family-4379	7.1	+	0
ARIC00018	303492	303549	LTR/Gypsy#Gypsy-171_AA-I	15.6	+	0
ARIC00018	363639	363796	LTR/Gypsy#rnd-5_family-300	26.3	+	4
ARIC00018	364084	364142	DNA/TcMar-Mariner#Mariner-N1_ACe	21.1	-	2
ARIC00018	439751	439888	LTR/TelKA#TelKA3b_Av	30.4	-	2
ARIC00018	462058	462124	PLE/Penelope-Athena#AthW2-2	20	-	0
ARIC00018	473844	473898	LTR/Gypsy#Gypsy12-NVi_LTR	10.3	-	1695
ARIC00018	480551	480606	LTR/Gypsy#Gypsy-35_CGi-I	12.7	-	111
ARIC00018	490935	491167	LTR/Ngaro#rnd-5_family-1935	31.8	+	1964
ARIC00018	516869	516945	DNA/hAT-Ac#rnd-5_family-2953	24.1	+	2
ARIC00018	522334	522374	LINE/L2#Kiri-30_AAe	17.1	+	50
ARIC00018	522343	522380	LTR/Gypsy#Gypsy-28_DBp-I	13.2	-	43
ARIC00018	522381	522425	LINE/I-Jockey#Helena_Ds	13.8	-	44
ARIC00018	529844	529954	LTR/Gypsy#rnd-5_family-300	27.5	+	60
ARIC00018	644850	644974	DNA/RC#Heli1_Av	27.9	+	2
ARIC00018	646115	646300	DNA/hAT#hAT1_Av	29.1	+	22
ARIC00018	647475	647585	DNA/Ginger#Ginger2d_Av	17.9	+	4
ARIC00018	658253	659097	DNA/RC#Heli3a_Av	19	+	0
ARIC00018	667423	667521	LTR/Pao#BEL-52_AA-I	23.7	-	23
ARIC00018	682153	682242	LTR/Gypsy#Gypsy-35_CGi-I	26.8	+	19
ARIC00018	705747	705815	DNA/Maverick#Polinton-1_PBa	14.6	-	1
ARIC00019	34484	34590	DNA/Maverick#Polinton-8_NVi	30.2	+	7
ARIC00019	40005	73809	LTR/Gypsy#rnd-5_family-2148	1.595	+	77292
ARIC00019	78986	79122	LTR/Juno-Vesta#Juno1_Av	12.6	+	6
ARIC00019	82565	82683	DNA/TcMar-Tc1#rnd-1_family-107	18.1	-	5
ARIC00019	83379	83496	DNA/TcMar-Tc1#rnd-1_family-107	15.5	+	3
ARIC00019	119935	119973	LTR/Pao#Nobel_I	5.3	-	0
ARIC00019	160420	160500	DNA/hAT-Ac#rnd-5_family-929	21.2	-	45
ARIC00019	193953	194002	DNA/Maverick#Polinton-5_NVi	20.4	+	0
ARIC00019	194723	194774	LTR/Pao#BEL-30_CQ-LTR	19.2	+	90
ARIC00019	196849	196892	DNA/RC#Pr_Helitron1	18.2	+	45
ARIC00019	209778	210579	DNA/MULE-MuDR#MuDR3_Av	27.618	+	4
ARIC00019	213800	213875	LTR/Gypsy#rnd-5_family-2108	23.7	+	17
ARIC00019	263650	263702	DNA/TcMar-m44#Mariner-55_LMi	17.7	+	1
ARIC00019	274497	274570	LINE/L2#Daphne-5_HRo	23	+	42
ARIC00019	283729	283899	LTR/Unknown#ltr-1_family-6	15.9	-	1
ARIC00019	284665	285479	LINE/I-Jockey#Hebe2_Av	24.3	+	4
ARIC00019	287756	287795	LTR/Gypsy#Gypsy-286_AA-I	17.5	+	0
ARIC00019	296939	296981	LTR/Pao#BEL-16_DEl-I	14.3	-	15
ARIC00019	307680	309395	DNA/PiggyBac-PB#AvPB1	9.593	+	2
ARIC00019	317269	317343	DNA/hAT-Blackjack#hAT-4_PBa	22.6	-	8
ARIC00019	333087	333315	LTR/ERV1#rnd-5_family-1703	25.4	+	1014
ARIC00019	379073	379184	LTR/Gypsy#ltr-1_family-1	20	-	31
ARIC00019	404417	404610	LTR/Unknown#ltr-1_family-20	2.6	-	5
ARIC00019	464644	464697	PLE/Penelope-Athena#AthJ-W	13.2	-	92
ARIC00019	466489	466544	DNA/RC#Helitron-like-12_Hmel	14.6	+	31
ARIC00019	491123	491323	LTR/Unknown#ltr-1_family-15	7	-	34
ARIC00019	491324	491544	LTR/Gypsy#ltr-1_family-24	20.3	-	18
ARIC00019	491668	491873	LTR/Unknown#ltr-1_family-6	3.4	-	25
ARIC00019	492393	492508	DNA/TcMar-Pogo#pogo12_Av	26.7	-	16
ARIC00019	496106	497035	LINE/I-Jockey#rnd-5_family-1249	7.895	-	96
ARIC00019	496402	496900	DNA/Ginger#Ginger2b_Av	12.685	+	41
ARIC00019	496408	496799	DNA/Ginger#Ginger2b_Av	11.8	-	34
ARIC00019	512408	512459	LINE/L2#Daphne-31_HRo	17.3	-	9
ARIC00019	520890	520961	DNA/CMC-EnSpm#CACTA4_Av	26.4	+	0
ARIC00019	562978	563061	LTR/Gypsy#Gypsy68-I_AG	24.7	-	211
ARIC00019	577802	577914	PLE/Penelope#Penelope-6_HRo	20.5	-	96
ARIC00019	592792	592835	LTR/Gypsy#Gypsy61-I_AG	20.4	+	99
ARIC00019	592810	592867	PLE/Penelope-Athena#AthX-V-T	10.5	-	97
ARIC00019	605638	605690	DNA/Maverick#Polinton-9_NVi	19.2	+	356
ARIC00019	622464	622494	DNA#rnd-5_family-4923	9.7	-	50
ARIC00019	630066	630645	DNA/TcMar-Tc1#Tc13_Av	30.6	+	9
ARIC00019	633440	633709	DNA/TcMar-Mariner#Avmar5_Av	27.6	-	3
ARIC00019	633821	634004	DNA/TcMar-Mariner#Avmar5a_Av	29	+	5
ARIC00019	634696	634751	LINE/I#I-6_AAe	25	+	1512
ARIC00019	654930	655003	LTR/Gypsy#Gypsy-38_DWil-I	20.8	-	1
ARIC00019	662589	662642	LINE/CR1#CR1-16_HRo	20.4	-	0
ARIC00019	663539	663616	DNA#DNA2-10_CGi	30.8	-	0
ARIC00019	711187	711235	DNA/Kolobok-T2?#Kolobok-N1_AEc	20.4	+	0
ARIC00019	713157	713217	LTR/ERV1#rnd-5_family-1703	16.9	+	0
ARIC00019	742125	742270	DNA/MULE-MuDR#MuDR9_Av	30.3	-	13
ARIC00020	25802	25852	DNA/Maverick#Polinton-1_DAn	12.5	-	42
ARIC00020	35907	35978	DNA/hAT-Ac#rnd-5_family-929	18.9	-	86
ARIC00020	44056	44102	DNA/CMC-Chapaev#Chapaev-N2_AAe	17	+	42
ARIC00020	62199	64125	DNA/RC#rnd-6_family-3519	22.4	+	356
ARIC00020	108513	108588	DNA/hAT-Tip100#hAT-15_HRo	18.4	-	58
ARIC00020	108535	108614	LINE/R1#TRAS1	18.8	+	59
ARIC00020	131349	131440	LTR/Gypsy#rnd-6_family-954	25.3	-	351
ARIC00020	152941	153014	LTR/Copia#Copia-21_DPu-I	21.9	-	101
ARIC00020	161275	181011	LINE/RTE-BovB#rnd-6_family-3671	2.801	-	112530
ARIC00020	194793	194860	LTR/Copia#Copia-60_AA-I	27.9	+	41
ARIC00020	198627	198674	DNA/hAT-Ac#Homo10	16.7	-	7
ARIC00020	208413	208505	LTR/Ngaro#rnd-5_family-1935	29	+	270
ARIC00020	227530	227624	LINE/CR1#CR1-125_AAe	21.4	+	46
ARIC00020	236849	237053	LTR/Gypsy#Gypsy-43_DWil-I	26.8	+	1920
ARIC00020	266672	266873	LINE/I-Jockey#TART_DV	23.9	-	13
ARIC00020	268292	268342	PLE/Penelope-Athena#AthX-V-T	20	-	41
ARIC00020	269040	269105	DNA/Kolobok-T2#REP-4_PBa	24.6	-	1
ARIC00020	269794	269863	DNA/TcMar-Tc1#Mariner-N22_AG	27.1	+	1
ARIC00020	269808	269863	DNA/Kolobok-T2#Kolobok-2_AP	13.5	-	1
ARIC00020	269873	269910	LINE/L2#L2-8_NVi	25	-	1
ARIC00020	290700	290740	DNA/TcMar-Tc1#MarinerN11_AG	17.1	-	35
ARIC00020	327512	327601	LINE/L2#Daphne-6_CTe	16.3	-	19
ARIC00020	375306	375392	PLE/Penelope-Athena#AthW2-1	25.9	-	5
ARIC00020	375579	375666	DNA/hAT-Ac#rnd-5_family-929	27.4	+	11
ARIC00020	381422	381459	DNA#DNA2-31_CGi	10.5	-	109
ARIC00020	386337	386803	DNA/PiggyBac#rnd-5_family-550	24.144	+	4
ARIC00020	402159	402230	DNA/PIF-Harbinger#Harbinger-2N1_CGi	22.2	+	469
ARIC00020	403079	403142	LINE/L1#rnd-5_family-2546	8.9	-	168
ARIC00020	418393	418437	LTR/Gypsy#Gypsy61-I_AG	15.6	-	40
ARIC00020	418394	418484	LTR/Gypsy#Gypsy-35_CGi-I	27.2	+	57
ARIC00020	418405	418462	DNA/PiggyBac-PB#AvPB3	19	+	33
ARIC00020	435242	435289	PLE/Penelope-Athena#AthW2-1	20.8	+	140
ARIC00020	436241	436327	LTR/Pao#BEL11-I_AG	21.1	-	119
ARIC00020	479641	479771	LINE/R1#MinoAg1	27.2	+	35
ARIC00020	479681	479862	LINE/I-Jockey#TART_DV	23.7	+	51
ARIC00020	496621	496661	LTR/Pao#ROO_I	20.8	-	43
ARIC00020	496662	496730	LTR/Gypsy#Gypsy-29_DWil-I	20.3	-	97
ARIC00020	496965	497125	LINE/I-Jockey#TART_DV	25.8	-	136
ARIC00020	512974	513094	DNA/TcMar-Mariner#rnd-1_family-180	30	-	0
ARIC00020	514401	514671	DNA/TcMar-Mariner#Avmar7_Av	31.9	-	0
ARIC00020	514747	514900	DNA/TcMar-Pogo#pogo11_Av	22.2	+	0
ARIC00020	514911	514994	DNA/TcMar-Pogo#pogo11_Av	15.5	-	0
ARIC00020	516736	516887	DNA/Ginger#Ginger2d_Av	29.8	-	3
ARIC00020	517115	517266	DNA/Ginger#Ginger2d_Av	27.3	+	4
ARIC00020	531506	531519	LINE/R1#RTAg4	19.5	-	142
ARIC00020	534737	534799	LTR/Gypsy#Gypsy-14_DAn-I	23.8	-	207
ARIC00020	551130	551180	LTR/Pao#BEL-607_AA-I	18	-	1
ARIC00020	580324	580392	LTR/Gypsy#Gypsy-157_AA-I	10.9	-	21
ARIC00020	595296	595351	DNA/Crypton#Crypton-1_CTe	20.8	-	86
ARIC00020	618450	618510	LTR/Gypsy#Gypsy-28_DYa-I	25	+	148
ARIC00020	626574	626602	DNA/MULE-MuDR#MuDR14_Av	6.9	+	39
ARIC00020	640653	640674	DNA/RC#rnd-6_family-3519	20.9	+	3
ARIC00020	645562	645585	DNA/RC#rnd-6_family-3519	18.1	+	0
ARIC00020	649528	649562	LINE/L1-Tx1#Tx1-9_CGi	11.4	+	1399
ARIC00020	655091	655131	LTR/Copia#AACopia1_I	14.6	-	4
ARIC00020	670857	670931	DNA/hAT-Ac#rnd-5_family-929	16.9	+	0
ARIC00020	683114	683188	DNA/hAT-Ac#rnd-5_family-929	25	-	0
ARIC00020	696684	696698	DNA/RC#Helitron-N34_CGi	26.8	-	1
ARIC00020	696699	696766	DNA#DNA-11_CGi	19.1	+	2
ARIC00020	723550	723596	LTR/Gypsy#Gypsy-69_CQ-I	11.1	-	1041
ARIC00020	736000	736462	DNA/RC#Heli3a_Av	18.9	+	76
ARIC00020	742717	742748	DNA/MULE-MuDR#rnd-5_family-3876	0	+	0
ARIC00021	100	768	LINE/I-Jockey#rnd-5_family-704	13	+	68
ARIC00021	1120	1245	LINE/I-Jockey#rnd-5_family-704	13.7	+	1
ARIC00021	3486	3608	DNA/Dada#rnd-5_family-636	25.8	-	61
ARIC00021	3533	3627	DNA/RC#Helitron-9_CGi	29.4	-	63
ARIC00021	3545	3613	PLE/Penelope-Athena#AthX-V-T	24.6	-	51
ARIC00021	3625	3670	LTR/Gypsy#Gypsy37-I_AG	30.4	-	62
ARIC00021	30463	30564	LTR/Pao#BEL-59_AA-I	29	+	591
ARIC00021	46675	46703	LTR/Gypsy#Gypsy37-I_AG	26.3	+	137
ARIC00021	46704	46759	DNA/Crypton#Crypton-1_CTe	18.2	+	160
ARIC00021	46757	46771	DNA/Zator#Zator1_Av	20.6	+	153
ARIC00021	60766	60839	LTR/Gypsy#Gypsy-22_DY-LTR	22.6	+	101
ARIC00021	66404	66459	DNA/Kolobok-T2#REP-4_PBa	20	+	100
ARIC00021	66410	66467	DNA/TcMar-Tc1#Mariner-18_HSal	20.7	+	106
ARIC00021	66424	66479	DNA/TcMar-Tc1#Mariner-52N1_HSal	20.4	-	105
ARIC00021	66547	66594	LTR/Pao#BEL-1_DPer-I	12.5	-	90
ARIC00021	66739	66802	DNA/Zisupton#rnd-4_family-860	14.1	-	41
ARIC00021	66765	66808	LTR/Gypsy#Gypsy-10_PBa-LTR	15.9	+	30
ARIC00021	68877	68921	PLE/Penelope-Athena#AthX-V-T	15.6	+	114
ARIC00021	75098	75157	LTR/Pao#BEL-20_DAn-I	21.7	+	350
ARIC00021	94270	94340	LTR/Pao#rnd-5_family-859	23.2	-	706
ARIC00021	106454	106529	DNA/TcMar-Tc1#Tc12_Av	25	+	192
ARIC00021	119601	119648	DNA/Maverick#Polinton-2_ACe	19.2	-	45
ARIC00021	129809	129871	DNA/TcMar-Mariner#Mariner-11_SIn	25.4	-	94
ARIC00021	138129	138178	DNA/Maverick#Polinton-2_NVi	24	-	64
ARIC00021	166025	166074	LINE/L2#rnd-5_family-1522	14.6	-	47
ARIC00021	177696	177731	PLE/Penelope-Athena#AthW1-J-R	8.3	+	279
ARIC00021	189989	190092	LTR/Unknown#ltr-1_family-9	22.2	-	30
ARIC00021	203830	203957	DNA/Sola-3#Sola3-1_DPu	21	-	12
ARIC00021	239423	239475	LINE/R1#RT1	11.3	+	95
ARIC00021	239432	239528	LTR/Pao#ROO_I	24.2	+	99
ARIC00021	239476	239489	PLE/Penelope-Athena#AthV-L1	15.9	+	84
ARIC00021	305058	305104	PLE/Penelope-Athena#AthX-V-T	13.1	-	11
ARIC00021	309227	309302	LTR/Gypsy#Gypsy68-I_AG	18.9	-	0
ARIC00021	309251	309307	DNA/P#P-1_DBp	19.3	+	0
ARIC00021	321572	321611	LINE/I-Jockey#Jockey-4_DRh	17.5	+	45
ARIC00021	332335	332379	LTR/Gypsy#Gypsy8-I_Dpse	20	-	43
ARIC00021	333316	333354	DNA/hAT-Blackjack#hAT-4_PBa	12.8	-	12
ARIC00021	393443	393510	LTR/Pao#rnd-6_family-1773	10.3	-	31227
ARIC00021	403965	404115	LTR/Gypsy#Gypsy-43_DWil-I	24.6	-	0
ARIC00021	496536	496581	LINE/I-Jockey#TART_DV	15.2	-	569
ARIC00021	510775	510822	LINE/I-Jockey#HeT-A3_DVi	18.8	+	2
ARIC00021	515187	515257	LTR/Gypsy#Gypsy-233_AA-I	23.9	+	30
ARIC00021	534937	535001	LINE/L2#L2-8_NVi	18.5	-	86
ARIC00021	549553	549607	PLE/Penelope#Penelope-119_LMi	24.1	-	6
ARIC00021	552967	553083	LTR/Pao#ROO_I	29.3	+	23
ARIC00021	552983	553099	LINE/R1#RTAg4	33.3	+	23
ARIC00021	552988	553126	DNA/Maverick#Polinton-2_PBa	26.3	+	24
ARIC00021	562390	562479	DNA/RC#Helitron-N1_PBa	21.1	-	45
ARIC00021	609714	609758	LTR/Juno-Vesta#Juno1_Av	11.4	-	6137
ARIC00021	636153	636259	PLE/Penelope#Penelope1a_Av	18.2	-	1
ARIC00021	636477	636676	PLE/Penelope-Athena#AthK-V	30.3	-	3
ARIC00021	639194	639255	LINE/R1#RT1	17	-	189
ARIC00021	639202	639287	LINE/I-Jockey#Ag-Jock-1	19.1	-	222
ARIC00021	665483	665601	DNA/PIF-ISL2EU#ISL2EU-8_CGi	26.2	-	727
ARIC00021	695892	695939	LINE/I-Jockey#Jockey-8_DVi	15.6	-	23
ARIC00021	712329	712402	DNA/TcMar-Tc4#Mariner3-4N1_LMi	24.3	-	784
ARIC00022	19711	19766	LINE/L1#L1-20_LSal	26.8	+	133
ARIC00022	35762	35792	DNA/hAT-hAT19#hAT-29_LSal	9.7	-	705
ARIC00022	65384	65443	PLE/Penelope#Penelope-85_LMi	23.7	+	1118
ARIC00022	93683	93725	PLE/Penelope-Athena#AthX-V-T	13.9	+	48
ARIC00022	111751	111799	LTR/Gypsy#Gypsy37-I_AG	20.4	+	113
ARIC00022	148397	148435	LINE/I-Jockey#BMC1	15.4	-	56
ARIC00022	174027	174100	DNA/Kolobok-Hydra#Kolobok-3_Aplcal	30.1	+	911
ARIC00022	174035	174169	DNA/TcMar-Tc1#Mariner-N22_AG	30	+	924
ARIC00022	239621	239698	DNA#rnd-5_family-4923	18.1	-	3
ARIC00022	245130	245213	DNA/TcMar-Mariner#Mariner-2_PBa	23.4	-	6
ARIC00022	326882	326919	LINE/L2#Daphne-7_HMM	10.5	+	131
ARIC00022	346827	346873	LINE/I#Ingi-2_LMi	15.6	-	274
ARIC00022	361429	361499	DNA/hAT-Charlie#hAT-11_HRo	22.5	+	0
ARIC00022	364464	364509	LTR/Gypsy#Gypsy-35_CGi-I	15.2	-	414
ARIC00022	364510	364522	DNA/Crypton#Crypton-1_CTe	16.7	-	392
ARIC00022	368750	368801	DNA/hAT-Charlie#HATN1_AG	16	-	58
ARIC00022	430683	430720	PLE/Penelope-Athena#AthW1-J-R	10.5	-	93
ARIC00022	432985	433057	LINE/CR1#CR1-14_HRo	20.3	-	5
ARIC00022	475568	475615	LTR/Gypsy#Gypsy14-LTR_Dpse	22.9	-	15
ARIC00022	494594	494851	LTR/Gypsy#ltr-1_family-1	0	+	250
ARIC00022	494852	500711	LTR/Gypsy#ltr-1_family-1	0	+	1595
ARIC00022	512116	512190	LTR/Copia#Copia-109_AA-LTR	17.8	+	59
ARIC00022	516610	516771	DNA/CMC-EnSpm#DNA3-1_CGi	28.8	+	85
ARIC00022	557805	557862	LTR/Pao#BEL-6_DEl-I	19	+	0
ARIC00022	584136	584177	DNA/hAT-Ac#rnd-6_family-3575	11.9	+	15
ARIC00022	587364	587402	LTR/Gypsy#Gypsy33-I_AG	15.4	-	118
ARIC00022	591740	591778	PLE/Penelope-Athena#AthW2-1	10.3	-	2
ARIC00022	608796	608932	LTR/Pao#rnd-5_family-859	33.1	+	12
ARIC00022	653635	653695	PLE/Penelope-Athena#AthV-L1	14.1	+	2
ARIC00022	659716	659794	PLE/Penelope-Athena#AthX-V-T	24.7	+	245
ARIC00022	659753	659800	DNA/Crypton#Crypton-1_CTe	16.7	+	227
ARIC00022	669984	670025	LINE/L2#L2-8_NVi	4.9	+	8
ARIC00022	687726	687960	LTR/ERV1#rnd-5_family-199	32.7	+	9
ARIC00023	1330	1418	LTR/Pao#rnd-5_family-859	22.4	+	0
ARIC00023	73272	73312	DNA/Zator#Zator1_Av	19.5	+	37
ARIC00023	86367	86428	LTR/Gypsy#Gypsy-26_SI-I	18.3	+	188
ARIC00023	90077	90122	LTR/Pao#BEL-74_CQ-LTR	17.4	+	285
ARIC00023	139481	139555	LTR/Gypsy#Gypsy-16_SI-I	28	+	23
ARIC00023	150846	150887	DNA#DNA2-6_CGi	12.2	-	2
ARIC00023	170406	170481	LTR/Gypsy#Gypsy61-I_AG	25	-	401
ARIC00023	191502	191557	LTR/Gypsy#Gypsy-47_DWil-I	21.8	-	38
ARIC00023	198384	198407	DNA/TcMar-Tc1#Tc12_Av	35.6	-	0
ARIC00023	198408	198535	DNA/TcMar-Tc1#Tc13_Av	29.6	+	0
ARIC00023	200800	201381	DNA/MULE-MuDR#MuDR8_Av	21.5	-	31
ARIC00023	201431	202789	DNA/MULE-MuDR#rnd-5_family-1620	17.6	-	24
ARIC00023	202687	202813	LTR/Gypsy#ltr-1_family-14	14.2	+	1
ARIC00023	238979	239036	DNA/Crypton#Crypton-1_CTe	14	+	48
ARIC00023	239002	239062	PLE/Penelope-Athena#AthW1	19.7	+	57
ARIC00023	239095	239141	LINE/I#I-7_LMi	19.1	+	46
ARIC00023	257589	257794	LTR/Unknown#ltr-1_family-6	6.8	-	8
ARIC00023	263527	263601	PLE/Penelope#Penelope-6_HRo	16.9	+	160
ARIC00023	275080	275171	DNA/Crypton#Crypton-1_CTe	12.5	+	117
ARIC00023	285704	285761	DNA/Maverick#Polinton-2_ACe	17.2	+	8
ARIC00023	313184	313288	DNA/TcMar-Mariner#Avmar5a_Av	23.8	-	3
ARIC00023	326346	326430	PLE/Penelope-Athena#AthL3	27.1	+	43
ARIC00023	330243	330304	LTR/Gypsy#rnd-5_family-2148	17.7	+	73
ARIC00023	343269	343315	DNA/Maverick#Polinton-1_NVi	12.8	-	8
ARIC00023	352378	352421	PLE/Penelope#Penelope-5_HRo	15.9	-	20
ARIC00023	354929	354995	LTR/Copia#Copia-22_DPu-I	22.7	+	62
ARIC00023	410337	410398	LINE/I-Jockey#Jockey-1_Dro	12.3	+	7
ARIC00023	425821	425884	PLE/Penelope-Athena#AthX-V-T	18.8	-	0
ARIC00023	429555	429594	DNA/TcMar-Fot1#Mariner-24_CGi	15	-	0
ARIC00023	498442	498540	LTR/Pao#rnd-5_family-859	22.1	-	143
ARIC00023	499976	500011	PLE/Penelope-Athena#AthW2-1	2.9	+	171
ARIC00023	513763	513811	DNA/TcMar-Tc1#Mariner-52N1_HSal	20.4	-	128
ARIC00023	513767	513817	LTR/Gypsy#Gypsy-70_LMi-I	23.5	-	129
ARIC00023	513773	513842	DNA/Ginger#Ginger1-1_AC	24.6	+	134
ARIC00023	515018	515056	LTR/Pao#BEL-238_AA-I	5.6	+	434
ARIC00023	517240	517390	DNA/MULE-MuDR#MULE3_Av	19.8	+	116
ARIC00023	519881	520192	DNA/hAT-Ac#rnd-6_family-3575	31.9	-	62
ARIC00023	553145	553203	LINE/L1#rnd-5_family-8088	13.8	-	195
ARIC00023	553223	553241	LTR/Gypsy#Gypsy61-I_AG	20.6	+	303
ARIC00023	574521	574588	PLE/Penelope-Athena#AthW2-1	23.9	+	4
ARIC00023	591199	591303	LINE/RTE-BovB#rnd-6_family-3671	21.5	-	57
ARIC00023	599070	599156	LTR/Pao#rnd-5_family-859	27.9	+	6465
ARIC00023	599161	599307	LTR/Pao#rnd-6_family-1773	17.7	+	7407
ARIC00023	599389	599535	LTR/Pao#rnd-6_family-1773	16.3	+	3956
ARIC00023	599743	599823	LTR/Pao#rnd-6_family-1773	24.7	+	3526
ARIC00023	599905	600045	LTR/Pao#rnd-6_family-1773	19.1	+	7038
ARIC00023	614570	614621	LTR/Gypsy#Gypsy-65_LMi-LTR	17.3	-	105
ARIC00023	626193	626232	DNA#DNA-84_LSal	12.5	+	87
ARIC00023	633559	633635	LTR/Gypsy#Gypsy-7_DPu-I	18.2	-	1773
ARIC00023	635593	635646	DNA#DNA3-14_CGi	13.2	+	3
ARIC00023	660511	660592	LTR/Gypsy#Gypsy-20_PBa-I	22.5	-	8
ARIC00023	671761	671911	DNA/PIF-ISL2EU#ISL2EU1_Av	32.9	+	0
ARIC00023	672158	672663	DNA/PIF-ISL2EU#ISL2EU1_Av	29.8	-	0
ARIC00023	686831	686979	LTR/Gypsy#Gypsy61-I_AG	27.7	+	60
ARIC00023	691917	691952	LTR/Gypsy#Gypsy-33_LMi-I	11.1	-	169
ARIC00023	708123	708171	DNA/hAT-Charlie#hAT-1_DAn	10.7	-	4
ARIC00023	715040	715107	SINE?#rnd-4_family-826	15.7	-	0
ARIC00023	731077	731110	LINE/L2#Daphne-14_HRo	3.1	-	8
ARIC00023	731081	731112	LINE/L2#Daphne-24_HRo	3.2	-	8
ARIC00023	731309	731365	LTR/Juno-Vesta#Juno1_Av	16.7	-	2
ARIC00024	24212	24290	DNA/hAT-Ac#rnd-5_family-929	23.1	-	1
ARIC00024	52677	52720	LTR/Gypsy#Gypsy-76_LMi-I	15.9	+	90
ARIC00024	128244	128821	DNA/hAT-Ac#rnd-5_family-929	30.3	+	200
ARIC00024	131225	131458	DNA/TcMar-Mariner#Avmar5_Av	24.1	+	0
ARIC00024	148762	148814	DNA#DNA3-4_CGi	13.2	+	0
ARIC00024	159870	159916	DNA/RC#Helitron-9_CGi	17	-	274
ARIC00024	160826	160935	LTR/Pao#BEL-159_AA-LTR	29.3	+	231
ARIC00024	173524	173602	DNA/RC#Helitron-like-13_Hmel	18.4	-	11
ARIC00024	174684	174727	DNA/hAT-Ac#rnd-5_family-929	11.9	-	28
ARIC00024	184823	184875	DNA/Crypton#Crypton-1_CTe	15.1	-	140
ARIC00024	197439	197498	LINE/I-Jockey#Jockey-13_DBp	17.9	-	122
ARIC00024	206509	206588	LTR/Gypsy#Gypsy61-I_AG	10	-	0
ARIC00024	208972	209040	PLE/Penelope-Athena#AthX-V-S	21.2	+	76
ARIC00024	218058	218133	LTR/Pao#BEL-223_AA-I	25	-	1124
ARIC00024	244085	244181	DNA/hAT-Ac#rnd-5_family-2953	21.6	+	4
ARIC00024	259592	259665	LTR/Gypsy#rnd-6_family-954	21.6	-	2
ARIC00024	260454	260505	DNA/hAT-Ac#HAT1_AG	23.1	-	1454
ARIC00024	264831	264908	LINE/I-Jockey#HeT-A3_DVi	24.4	+	319
ARIC00024	291041	291101	LTR/Copia#Copia-123_AA-I	31.1	-	281
ARIC00024	299636	299680	DNA/TcMar-m44#Mariner-40_LMi	11.1	+	87
ARIC00024	300257	300335	LINE/R1#RT1	24.4	-	115
ARIC00024	300269	300391	LINE/I-Jockey#TART_DV	22.9	-	138
ARIC00024	304851	304920	DNA/MULE-MuDR#MULE5_Av	15.9	-	49
ARIC00024	338001	338057	LINE/L2#Kiri-35_AAe	21.1	+	143
ARIC00024	364376	364429	LTR/Gypsy#Gypsy-1_AC-I	24.1	-	15
ARIC00024	364383	364441	DNA/Maverick#Polinton-2_ACe	21.1	-	17
ARIC00024	364397	364458	DNA/hAT-Ac#rnd-5_family-2953	21.3	-	12
ARIC00024	367778	367887	PLE/Penelope#Penelope-5_HRo	23.1	+	59
ARIC00024	367812	367859	LTR/Copia#Copia-11_CQ-I	30.7	+	59
ARIC00024	367819	367889	LTR/Gypsy#Gypsy37-I_AG	25.4	+	60
ARIC00024	413336	413409	LTR/Gypsy#Gypsy-32-I_NVi	24.3	+	930
ARIC00024	437753	437843	LINE/R1#R1_DPs	17	-	12
ARIC00024	446311	446356	LTR/Pao#rnd-5_family-859	10.9	+	7
ARIC00024	462406	462472	DNA/CMC-Transib#Transib-N1_AAe	17.8	+	784
ARIC00024	512445	512494	LINE/L2#L2-8_NVi	18	+	48
ARIC00024	512461	512528	DNA/Zisupton#rnd-4_family-860	25	-	63
ARIC00024	519231	519436	LTR/Unknown#ltr-1_family-6	1.5	-	441
ARIC00024	519437	520217	LTR/Unknown#ltr-1_family-7	3.2	-	646
ARIC00024	520180	520217	LTR/TelKA#TelKA1a_Av	9.8	+	68
ARIC00024	520218	520552	LTR/Unknown#ltr-1_family-6	0.592	-	81
ARIC00024	527908	527959	LTR/Juno-Vesta#Juno3_Av	18	-	150
ARIC00024	543172	543516	DNA/hAT-Ac#rnd-1_family-3	30.2	-	23
ARIC00024	558033	558080	LTR/Gypsy#Gypsy37-I_AG	16.7	+	30
ARIC00024	558047	558090	DNA/Maverick#Polinton-4_PBa	15.9	+	26
ARIC00024	572063	572127	DNA/RC#Helitron-9_CGi	24.6	+	442
ARIC00024	572080	572171	LTR/Juno-Vesta#Juno2_Av	24.4	-	468
ARIC00024	587636	587685	LINE/L2#Kiri-13_HMM	12.5	+	146
ARIC00024	587973	588083	DNA/hAT-Ac#rnd-5_family-475	36	-	322
ARIC00024	624720	624772	DNA/Maverick#Polinton-1_CB	15.1	-	158
ARIC00024	626799	626867	DNA/hAT-Ac#rnd-5_family-929	21.7	+	6
ARIC00024	649961	650023	PLE/Penelope#Penelope-8_HRo	21.3	+	318
ARIC00024	671112	671155	DNA/TcMar-Tc1#Mariner-11_AEc	9.3	-	196
ARIC00024	676585	676642	DNA/hAT-hAT19#hAT-11N1_LSal	14.6	+	353
ARIC00024	680802	680862	DNA/hAT-Charlie#hAT-11_HRo	15	+	11
ARIC00024	680818	680868	LTR/Gypsy#Gypsy-10_DVir-LTR	19.6	+	11
ARIC00024	680826	680917	DNA/P#P-1_LHu	21.9	+	15
ARIC00024	682172	682229	LTR/Pao#BEL-1_LMi-I	16.7	-	15
ARIC00024	686612	686657	LINE/L2#L2-7_Hmel	15.2	+	2
ARIC00024	696675	696757	DNA/Dada#rnd-5_family-636	26.8	-	81
ARIC00024	716510	716546	PLE/Penelope-Athena#AthW1-J-R	2.9	+	17
ARIC00025	83	325	LINE/RTE-BovB#RTE_BovB_Av	28.4	+	0
ARIC00025	60934	60974	PLE/Penelope#Penelope-51_LMi	9.8	-	319
ARIC00025	74618	74681	DNA/P#P4_Av	22.2	+	9
ARIC00025	79308	79346	LTR/Gypsy#Gypsy55-I_AG	26.5	-	29
ARIC00025	79342	79382	DNA/Maverick#Polinton-9_NVi	12.2	+	35
ARIC00025	79347	79406	PLE/Penelope-Athena#AthM	20	+	42
ARIC00025	79358	79415	LTR/Gypsy#Gypsy-35_CGi-I	19	+	42
ARIC00025	86033	86090	DNA/PIF-Harbinger#Harbinger-5_CGi	27.6	-	2
ARIC00025	86121	86238	DNA#DNA3-4_CGi	13.5	-	2
ARIC00025	102013	102059	LTR/Gypsy#NOMAD_I	13.6	-	108
ARIC00025	216050	216117	LTR/Copia#Copia-26_AA-I	22.4	-	10
ARIC00025	216220	216267	LINE/I-Jockey#Ag-Jock-13	20.8	-	13
ARIC00025	224845	225028	LTR/Unknown#ltr-1_family-25	8	-	175
ARIC00025	224965	225280	LTR/Gypsy#ltr-1_family-24	5.1	-	449
ARIC00025	283999	284091	DNA/hAT-Ac#rnd-5_family-929	15.6	-	1
ARIC00025	318704	318787	LINE/RTE-BovB#rnd-6_family-3671	19.1	-	0
ARIC00025	327764	327882	DNA/TcMar-Mariner#Avmar5a_Av	17.6	-	2525
ARIC00025	331114	331204	LINE/CR1#CR1-49_AAe	19.3	+	210
ARIC00025	366023	366634	DNA/TcMar-Tc1#Tc2_Av	12.502	-	128
ARIC00025	396129	397133	DNA/hAT-Ac#rnd-5_family-929	30.2	+	367
ARIC00025	402058	402121	DNA/hAT-Ac#hATN-1_HRo	23	+	155
ARIC00025	427417	427564	DNA/PIF-ISL2EU#ISL2EU1_Av	33.5	-	3
ARIC00025	440124	440185	LTR/Gypsy#Invader1_I	16.4	+	37
ARIC00025	479648	479683	DNA/TcMar-Mariner#Mariner-1_BM	11.1	-	0
ARIC00025	504774	504843	DNA/RC#Helitron-N2_LMi	20.6	-	3
ARIC00025	511228	511316	DNA/Dada#rnd-5_family-636	16.3	-	44
ARIC00025	511315	511325	DNA/Crypton#Crypton_Av	19.6	-	41
ARIC00025	518129	518199	DNA/hAT-Ac#rnd-5_family-929	19.3	+	77
ARIC00025	518797	518867	LINE/R1#SART-4_APi	21.7	+	80
ARIC00025	524094	524173	PLE/Penelope-Athena#AthV-L1	20.5	-	89
ARIC00025	524372	524419	LTR/Copia#Copia8-NVi_I	14.6	+	185
ARIC00025	536905	536975	DNA#DNA8-1D_RPr	13	-	1
ARIC00025	541045	541101	LTR/Gypsy#rnd-5_family-2108	24.6	+	8
ARIC00025	543246	543286	LTR/Gypsy#rnd-6_family-954	12.2	+	13
ARIC00025	544343	544418	LINE/L2#L2-31_HRo	23	+	26
ARIC00025	598773	611732	DNA/Dada#rnd-5_family-636	23.509	+	2919
ARIC00025	602679	602737	LTR/Gypsy#Gypsy61-I_AG	25.4	-	169
ARIC00025	602738	602753	LTR/Gypsy#Gypsy37-I_AG	23.1	+	157
ARIC00025	670495	670585	LTR/Pao#BEL-115_AA-LTR	16.9	+	200
ARIC00025	695127	695193	LTR/Gypsy#Gypsy61-I_AG	22.4	+	40
ARIC00025	707391	707471	LTR/Gypsy#Gypsy-43_CQ-I	18.7	-	16
ARIC00026	1	1866	LINE/I-Jockey#rnd-5_family-704	11.361	+	197
ARIC00026	37960	38031	DNA#DNA3-10_CGi	15	+	0
ARIC00026	37979	38055	DNA/Maverick#Polinton-9_NVi	15.1	-	0
ARIC00026	86959	87083	PLE/Penelope#Penelope-50_LMi	29.8	+	0
ARIC00026	117432	117453	DNA/hAT-Ac#rnd-5_family-929	22.7	+	24
ARIC00026	132677	132755	LINE/L1#L1-61_LSal	21.8	+	402
ARIC00026	137255	137301	DNA/PIF-ISL2EU?#ISL2EU-N1_RPr	17.4	-	8
ARIC00026	140588	140621	LTR/Gypsy#Gypsy-1_AC-I	14.7	+	8
ARIC00026	161558	161577	LTR/Gypsy#Gypsy-260_AA-LTR	24.5	+	2
ARIC00026	208683	208759	DNA#DNA2-7_CGi	20.6	+	57
ARIC00026	209559	209639	LTR/ERV1#rnd-5_family-199	23.4	-	54
ARIC00026	217303	217350	LTR/Pao#rnd-5_family-859	22.9	-	265
ARIC00026	238040	238086	LTR/Gypsy#Gypsy37-I_AG	12.8	+	40
ARIC00026	240031	240123	LTR/Pao#BEL-88_AA-I	23	+	16
ARIC00026	291172	291237	LTR/Gypsy#Gypsy-26-I_NVi	20.3	+	2
ARIC00026	309233	309319	LINE/L1#L1_Ele28	27.3	-	100
ARIC00026	317409	317452	LTR/Copia#Copia-35_DPu-I	10.1	-	376
ARIC00026	388179	388214	LTR/ERV1#rnd-5_family-1703	11.1	-	283
ARIC00026	389075	389141	LTR/Gypsy#Gypsy55-I_AG	19.7	+	428
ARIC00026	390245	390313	LINE/I-Jockey#Jockey-1_DPer	17	-	132
ARIC00026	396214	396433	DNA/TcMar-Pogo#pogo11_Av	25.9	+	66
ARIC00026	404567	404628	DNA/TcMar-Tc1#Mariner-18_HSal	24.2	-	21
ARIC00026	409590	409624	LINE/L2#CR1-1_AG	11.4	+	13
ARIC00026	414582	414627	LTR/Pao#BEL-1_CGi-I	11.4	-	16
ARIC00026	426926	426960	LTR/Gypsy#Gypsy11_I	8.6	-	120
ARIC00026	438534	438657	LTR/Gypsy#Gypsy61-I_AG	25	-	274
ARIC00026	438558	438624	DNA/RC#Helitron-9_CGi	23.9	+	240
ARIC00026	440359	440435	DNA/Dada#rnd-5_family-636	22.4	+	202
ARIC00026	440376	440423	LTR/Gypsy#Gypsy-35_CGi-I	14.6	+	190
ARIC00026	466381	466418	DNA?/hAT?#REP-2_DF	10.5	+	14
ARIC00026	470596	470704	LINE/L2#rnd-5_family-1522	23.1	+	107
ARIC00026	493877	493948	DNA/Dada#rnd-5_family-636	23.9	+	212
ARIC00026	497479	497540	DNA/TcMar-Tc1#Mariner-N5_HSal	25	-	1
ARIC00026	503877	504009	LTR/Ngaro#rnd-5_family-1935	27.4	-	0
ARIC00026	507090	507127	LINE/L1-Tx1#Tx1-3_CGi	13.2	-	29
ARIC00026	531199	531229	LTR/Gypsy#Gypsy-222_AA-I	6.5	+	1
ARIC00026	538369	538409	LTR/Gypsy#Gypsy-3_PBa-I	14.6	+	82
ARIC00026	539669	539726	DNA/hAT-Pegasus#Homo6	24.1	-	90
ARIC00026	539681	539735	LINE/L2#Daphne-17_HRo	21.8	-	92
ARIC00026	541958	542035	LINE/I-Jockey#TART_DV	26.9	+	564
ARIC00026	546709	546750	DNA/Kolobok-T2#REP-4_PBa	21.4	-	179
ARIC00026	547013	547089	DNA/CMC-Chapaev-3#Chapaev3-1_HR	23.4	+	359
ARIC00026	547172	547226	DNA/CMC-Chapaev#Chapaev-1_AA	16.4	+	119
ARIC00026	581170	616189	LINE/L1#rnd-5_family-8088	25.724	+	24419
ARIC00026	606520	606588	DNA/TcMar-Pogo#rnd-5_family-540	17.6	-	0
ARIC00026	610120	610208	LINE/R1#RTAg4	35.5	+	163
ARIC00026	624849	624922	LTR/Gypsy#Invader2_I	18.5	-	161
ARIC00026	670483	670528	LTR/Gypsy#Gypsy-35_CGi-I	17.4	-	6
ARIC00026	679322	679372	LTR/Gypsy#Gypsy61-I_AG	15.7	+	39
ARIC00027	36327	36495	LTR/Ngaro#rnd-5_family-1935	28.4	+	91
ARIC00027	36710	37239	LTR/Ngaro#rnd-5_family-1935	31.1	+	163
ARIC00027	38097	38285	LTR/Ngaro#rnd-5_family-1935	25.9	-	223
ARIC00027	38801	39106	LTR/Ngaro#rnd-5_family-1935	27.9	-	168
ARIC00027	44643	44698	DNA#rnd-5_family-4923	7.5	-	23
ARIC00027	72755	72852	DNA/Maverick#Polinton-3_TC	25.5	-	55
ARIC00027	90040	90084	PLE/Penelope-Athena#AthW1-J-R	5.2	+	4
ARIC00027	96623	96678	PLE/Penelope-Athena#AthJ-N	17	+	24
ARIC00027	107269	107317	LTR/Gypsy#Gypsy-7_CGi-I	10.6	+	0
ARIC00027	117082	117155	DNA/TcMar-Tc4#Mariner-38B_SIn	23.6	-	741
ARIC00027	118707	118790	DNA/CMC-EnSpm#CACTA6_Av	17.2	-	0
ARIC00027	126697	126748	DNA/TcMar-Fot1#Mariner-24_CGi	12	+	798
ARIC00027	159139	160048	DNA/hAT-Ac#rnd-5_family-2953	26.189	-	786
ARIC00027	188036	188081	LTR/Gypsy#Gypsy21-I_AG	14	+	11
ARIC00027	189043	189113	LINE/I#I_Ele13	29.6	+	26
ARIC00027	190055	190095	LTR/Gypsy#Gypsy-609_AA-I	12.2	+	14
ARIC00027	194645	194689	PLE/Penelope#Penelope-5_HRo	11.1	-	144
ARIC00027	218855	218936	LINE/L2#Daphne-41_LMi	21.8	+	2
ARIC00027	224854	225003	DNA/PiggyBac#piggyBac6_Av	27.1	+	31
ARIC00027	226725	226845	LINE/CR1#CR1_Ele9	27.1	+	9761
ARIC00027	249942	250015	PLE/Penelope-Athena#AthQ	18.6	-	1
ARIC00027	258042	258126	DNA/RC#Helitron-9_CGi	24.4	+	3
ARIC00027	272084	272147	DNA/RC#Helitron-1_DPe	20.1	+	30
ARIC00027	278658	278685	LTR/Gypsy#ltr-1_family-28	3.6	+	30
ARIC00027	310543	310579	LINE/CR1#CR1-92_AAe	18.9	+	1
ARIC00027	376571	376634	DNA/Dada#rnd-5_family-636	14.3	-	13
ARIC00027	432672	432739	LTR/Gypsy#rnd-5_family-130	22.1	+	7
ARIC00027	437216	437467	SINE?#rnd-5_family-4379	29.5	+	7
ARIC00027	441051	441132	LTR/Gypsy#Gypsy-222_AA-I	24.1	+	154
ARIC00027	489560	489641	LINE/I-Jockey#TART_DV	28.8	-	3
ARIC00027	489576	489648	PLE/Penelope#Penelope-6_HRo	17.8	-	3
ARIC00027	537192	537272	LINE/L2#Kiri-30_AAe	22.1	+	247
ARIC00027	558848	558918	LTR/Gypsy#Gypsy-55_CGi-I	22.1	-	396
ARIC00027	558994	559029	LINE/L2#L2B-4B_AAe	11.1	+	184
ARIC00027	563111	563177	PLE/Penelope-Athena#AthX-V-T	11.2	+	8
ARIC00027	569966	569990	LTR/Gypsy#Gypsy-22_DWil-I	17.4	+	35
ARIC00027	569991	570052	DNA/Kolobok-T2?#Kolobok-N1_AEc	24.2	-	103
ARIC00027	570057	570153	PLE/Penelope#Penelope-83_LMi	31.2	+	192
ARIC00027	584326	584391	DNA/hAT-Ac#rnd-5_family-929	19.7	+	40
ARIC00027	612351	612570	DNA/hAT-Ac#rnd-6_family-3575	29.1	-	104
ARIC00027	625982	626011	LTR/Gypsy#Gypsy-7_DRh-I	10	-	23
ARIC00027	639283	643029	PLE/Penelope-Athena#AthJ-N-W1	31.847	+	4
ARIC00027	639796	639903	PLE/Penelope-Athena#AthW	20.8	-	1
ARIC00027	640616	640821	LTR/Unknown#ltr-1_family-6	2.9	-	3
ARIC00027	651288	651761	DNA/RC#Heli3a_Av	17.8	+	0
ARIC00027	655187	655392	LTR/Unknown#ltr-1_family-6	3.4	-	0
ARIC00027	658995	682651	DNA/RC#rnd-6_family-3519	23.31	+	35177
ARIC00027	661866	661876	DNA/Maverick#Polinton-1_PBa	20.4	-	31
ARIC00027	661877	661918	LTR/Gypsy#Gypsy61-I_AG	14.3	-	41
ARIC00027	683065	683205	DNA/RC#rnd-6_family-3519	4.7	+	2
ARIC00028	67237	67292	LTR/Gypsy#Gypsy-11_DAn-I	20	-	427
ARIC00028	72200	72258	LTR/Gypsy#Gypsy-35_CGi-I	25.4	-	559
ARIC00028	112544	112594	LTR/Pao#BEL-269_AA-I	14	-	210
ARIC00028	123443	123550	DNA/CMC-EnSpm#DNA3-1_CGi	21.9	+	593
ARIC00028	137018	137071	PLE/Penelope-Athena#AthX-V-T	18.5	-	532
ARIC00028	164352	164445	DNA/hAT#hAT9_Av	28.7	+	0
ARIC00028	181802	181891	LTR/Pao#BEL-15_CGi-I	17.4	-	196
ARIC00028	195529	195575	LTR/TelKA#TelKA3b_Av	11.4	+	518
ARIC00028	197426	197468	LINE/L2#Daphne-17_HRo	13.9	-	0
ARIC00028	197469	197479	LTR/Gypsy#Gypsy-10_PBa-LTR	16.1	+	1
ARIC00028	197902	197991	DNA/Sola-1#Sola1-2_AC	21.5	+	8
ARIC00028	204711	204810	DNA/PIF-Spy#ISL2EU-N5B_CGi	20.6	+	1
ARIC00028	208051	208107	DNA/Kolobok-T2?#Kolobok-N1_AEc	17.5	-	11
ARIC00028	208054	208114	DNA/Kolobok-T2#Kolobok-2_AP	22.9	+	11
ARIC00028	208108	208121	DNA/Kolobok-Hydra#Kolobok-3_Aplcal	28.6	+	11
ARIC00028	208115	208134	LINE/L2#Daphne-58_LMi	20.9	+	11
ARIC00028	208189	208294	DNA/hAT-Ac#rnd-5_family-929	20.3	-	11
ARIC00028	236337	236382	DNA/CMC-Transib#Transib-1_DAn	15.2	-	4610
ARIC00028	281696	281931	DNA/RC#Heli3a_Av	20.4	+	2
ARIC00028	291319	291766	DNA/RC#Heli3a_Av	18.5	+	0
ARIC00028	292443	292648	LTR/Unknown#ltr-1_family-6	2.9	-	4
ARIC00028	323978	324030	LTR/Copia#Copia-59_AA-I	18.9	+	15
ARIC00028	347010	347055	LINE/L2#Kiri-13_HMM	10.9	-	4
ARIC00028	397495	397561	LINE/RTE-BovB#AviRTE_WBa	15.2	-	24
ARIC00028	452622	452684	DNA/hAT-Ac#rnd-5_family-475	28.6	+	17
ARIC00028	452722	452780	LINE/I#Nimb-2_RPr	22	+	485
ARIC00028	455187	455276	PLE/Penelope-Athena#AthW1-J-R	23	+	48
ARIC00028	470440	470540	DNA/Maverick#Polinton-4_PBa	20.9	-	2100
ARIC00028	487282	487427	LTR/Pao#rnd-6_family-1773	22.6	-	12956
ARIC00028	487510	487655	LTR/Pao#rnd-6_family-1773	24.7	-	10511
ARIC00028	487738	487964	LTR/Pao#rnd-6_family-1773	28.1	-	12943
ARIC00028	488194	488340	LTR/Pao#rnd-6_family-1773	22.4	-	31231
ARIC00028	501071	501130	LTR/Ngaro#rnd-5_family-1935	20.3	-	714
ARIC00028	528044	528091	LTR/Gypsy#Gypsy14-LTR_Dpse	16.7	+	3
ARIC00028	539751	539806	LINE/R1#TRAS1	23.6	+	18
ARIC00028	546332	546426	DNA/P#P9_Av	25.1	-	0
ARIC00028	576814	576884	DNA#DNA3-14_CGi	20	+	0
ARIC00028	576832	576882	DNA#DNA4-6_CGi	13.7	-	0
ARIC00028	585648	585711	DNA/hAT-Ac#rnd-5_family-929	16.1	+	27
ARIC00028	589093	589126	LTR/Gypsy#Gypsy-55_DEl-I	2.9	-	45
ARIC00028	590773	590809	DNA#DNA-like-14_Hmel	10.8	+	142
ARIC00028	595295	595360	LINE/I-Jockey#Jockey-2_LMi	19.1	-	983
ARIC00028	601967	602042	LINE/I-Jockey#Ag-Jock-1	32.9	-	1073
ARIC00028	628872	628909	LTR/Gypsy#Gypsy2-LTR_Dya	11.2	+	19
ARIC00029	15656	15703	DNA/Maverick#Polinton-1_PBa	18.8	-	28
ARIC00029	18369	18454	DNA/Dada#rnd-5_family-636	24.8	-	0
ARIC00029	31648	31699	DNA/Kolobok-T2?#Kolobok-N1_AEc	15.4	+	4
ARIC00029	31656	31702	LINE/R1#TRAS3_BM	14.9	+	4
ARIC00029	38135	38180	LTR/Gypsy#Gypsy-172_AA-I	15.2	+	1470
ARIC00029	47322	47626	LINE#rnd-5_family-1621	9.6	-	4
ARIC00029	53311	53373	DNA/RC#Helitron-N34_CGi	19.1	-	0
ARIC00029	63582	63663	DNA/hAT-Ac#rnd-5_family-929	20.8	+	67
ARIC00029	67536	67593	LTR/Gypsy#Gypsy-55_CGi-I	19	-	241
ARIC00029	68303	68373	DNA/Maverick#Polinton-1_NVi	21.4	+	76
ARIC00029	80157	80215	LTR/Copia#Copia-12_LMi-I	22	-	56
ARIC00029	86464	87633	SINE?#rnd-4_family-826	31.6	+	1246
ARIC00029	91140	91216	LTR/Gypsy#Gypsy-9_DVir-I	23.3	+	48
ARIC00029	91642	91698	LTR/Gypsy#Gypsy-13_CQ-I	17.8	-	50
ARIC00029	94566	94610	LINE/L2#Daphne-58_LMi	18.2	-	36
ARIC00029	94879	94947	LTR/Gypsy#CER2-I_CE	24.6	-	12
ARIC00029	103108	103153	DNA/Kolobok-T2?#Kolobok-N1_AEc	15.2	+	0
ARIC00029	103154	103164	SINE/tRNA-Core#OK	22.6	-	0
ARIC00029	106588	106658	DNA/TcMar-Tc1#Clu-168_AG	22.1	+	0
ARIC00029	112059	112149	LTR/Pao#BEL-173_AA-LTR	20.1	+	1
ARIC00029	141103	141563	DNA/Merlin#Merlin1_Av	27.7	-	4
ARIC00029	151640	151701	LINE/I#Loner_Ele1	21.7	-	82
ARIC00029	235001	235157	LTR/Juno-Vesta#Juno4b_Av	25.1	+	5
ARIC00029	242080	242214	DNA/Sola#Sola2e_Av	27.5	-	80
ARIC00029	311274	311328	LTR/Gypsy#Gypsy-38_DWil-I	18.2	-	93
ARIC00029	325037	325079	LTR/Gypsy#Gypsy-35_CGi-I	18.6	+	296
ARIC00029	331278	331302	LTR/Pao#BEL-72_AA-I	0	+	4
ARIC00029	347727	347741	LINE/L2#Kiri-13_HMM	23.6	+	67
ARIC00029	347742	347799	PLE/Penelope#Penelope-6_HRo	19	+	66
ARIC00029	347749	347799	DNA/hAT-Tip100#hAT-6_HRo	11.8	+	66
ARIC00029	347800	347816	DNA/RC#Helitron-3N1_NVi	20.6	+	66
ARIC00029	348995	349046	PLE/Penelope-Athena#AthW1-J-R	17.7	+	72
ARIC00029	354269	354335	DNA/RC#Helitron-9_CGi	26.9	+	790
ARIC00029	354290	354333	DNA/Crypton#Crypton-1_CTe	11.4	+	767
ARIC00029	361904	361940	LTR/Gypsy#Gypsy-23-I_NVi	13.5	-	12
ARIC00029	414988	415389	DNA/Sola#Sola2c_Av	32.6	-	5
ARIC00029	415915	416023	DNA/P#P-N6_LSal	21.3	+	0
ARIC00029	470917	470969	LTR/Gypsy#Gypsy-88_CQ-I	24.5	-	276
ARIC00029	486965	487015	LINE/L2#Kiri-30_AAe	15.7	+	83
ARIC00029	531091	531146	LTR/Gypsy#Gypsy-83_CQ-I	20.4	-	129
ARIC00029	552331	552553	DNA/TcMar-Tc1#Tc11_Av	26.1	+	89
ARIC00029	552782	552810	DNA/TcMar-Tc1#Tc11_Av	3.5	-	20
ARIC00029	558947	559009	PLE/Penelope-Athena#AthW2-1	20.6	+	11
ARIC00029	560363	560487	DNA/MULE-MuDR#MuDR-1_LMi	21.8	+	326
ARIC00029	614381	615215	SINE?#rnd-4_family-826	29.63	-	26
ARIC00029	621764	621803	LINE/L2#Daphne-16_HRo	12.5	-	18
ARIC00029	642596	642687	LTR/Gypsy#Gypsy-46_DWil-I	21.9	+	171
ARIC00030	579	644	LTR/Gypsy#Gypsy-14_DAn-I	28.8	-	125
ARIC00030	1056	1222	PLE/Penelope-Athena#AthW1	27.4	+	2
ARIC00030	65298	65360	DNA/Sola-2#Sola2-8_LMi	14.8	+	650
ARIC00030	65429	65497	DNA/Kolobok-Hydra#Kolobok-3_Aplcal	22.1	-	35
ARIC00030	90291	90349	DNA/Maverick#Polinton-5_NVi	17.2	+	0
ARIC00030	93463	93525	DNA/Ginger#Ginger2c_Av	22.6	-	0
ARIC00030	106842	106863	DNA/RC#rnd-6_family-3519	20.9	+	0
ARIC00030	111727	111754	DNA/RC#rnd-6_family-3519	18.8	+	0
ARIC00030	137031	137106	DNA/hAT-Ac#rnd-5_family-929	20	+	0
ARIC00030	140905	140990	LINE/L2#Daphne-11_HRo	20.4	-	38
ARIC00030	141449	141664	DNA/TcMar-Pogo#pogo13_Av	31.8	+	72
ARIC00030	141908	142032	DNA/TcMar-Pogo#pogo13_Av	33.3	-	47
ARIC00030	149615	149665	LTR/Gypsy#Gypsy-11_MMa-I	20	+	12
ARIC00030	149790	149852	DNA/hAT-Ac#rnd-5_family-929	23	+	0
ARIC00030	150509	150547	LTR/Gypsy#Gypsy14-LTR_Dpse	17.9	+	0
ARIC00030	182458	182537	LTR/Gypsy#Gypsy-101_AA-I	11.9	-	60
ARIC00030	201801	202659	DNA/Kolobok#Kolobok2_Av	30.206	+	82
ARIC00030	224842	224880	LINE/L2#L2-43_HRo	17.9	+	84
ARIC00030	250812	250877	LTR/Gypsy#Gypsy-1_AC-I	21.1	-	235
ARIC00030	250834	250887	DNA/Maverick#Polinton-2_PBa	14.8	-	199
ARIC00030	267531	267565	LTR/Pao#BEL-4_SI-LTR	14.3	-	37
ARIC00030	267536	267571	LTR/Pao#BEL-6_DMoj-I	11.1	-	37
ARIC00030	310116	310211	LINE/L2#Kiri-21_AAe	20.6	+	119
ARIC00030	328997	329055	LINE/CR1#CR1-45_AAe	16.1	+	29
ARIC00030	398416	398488	DNA/Ginger#Ginger2_Av	21.1	+	0
ARIC00030	409214	409255	LTR/Gypsy#Gypsy-64_LMi-I	14.3	+	10
ARIC00030	431010	431073	LTR/Pao#BEL-11_DBp-I	26.6	+	38
ARIC00030	437025	437053	DNA/Kolobok-T2#REP-4_PBa	21.2	-	6
ARIC00030	437054	437124	DNA/P#P-2_PBa	19.5	-	9
ARIC00030	439554	439616	SINE?#rnd-4_family-826	25.3	-	6
ARIC00030	457872	457943	DNA/MULE-MuDR#DNA9-2_AAe	23.9	-	3696
ARIC00030	460203	460286	DNA/hAT-Ac#rnd-5_family-2953	24.7	-	10
ARIC00030	515776	515815	LTR/Pao#BEL-6_DAn-I	17.5	+	0
ARIC00030	530319	530790	DNA/TcMar-Tc1#Tc5_cons_Av	31.842	+	7
ARIC00030	531636	531713	DNA/Maverick#Polinton-8_NVi	20.2	+	10
ARIC00030	531645	531715	DNA/PIF-Spy#ISL2EU-6_CGi	24.3	+	10
ARIC00030	567016	567053	LINE/L1#L1_Ele16	13.5	+	49
ARIC00030	591502	613878	LTR/ERV1#rnd-5_family-199	23.379	+	31973
ARIC00030	591701	591785	DNA#DNA3-8_LMi	21.3	-	2
ARIC00030	591715	591791	LTR/Gypsy#Gypsy-14_DAn-I	22.1	+	2
ARIC00030	599370	599419	LINE/I#I-1_DBp	20	+	131
ARIC00030	603360	603426	LTR/Gypsy#rnd-6_family-954	14.9	+	61
ARIC00030	647447	647525	DNA/Maverick#Polinton-9_NVi	20.2	+	0
ARIC00030	650570	650611	LTR/Pao#BEL12-I_AG	2.7	+	58
ARIC00031	27942	28042	DNA/hAT-Ac#rnd-6_family-3575	21	-	59
ARIC00031	47104	47146	DNA/Dada#rnd-5_family-636	7	-	172
ARIC00031	47110	47154	DNA/Crypton#Crypton-1_CTe	15.6	-	173
ARIC00031	47147	47157	PLE/Penelope-Athena#AthX-V-T	20.4	-	162
ARIC00031	47158	47171	LTR/Gypsy#Gypsy-35_CGi-I	20.3	-	157
ARIC00031	55319	55429	LTR/Pao#BEL-201_AA-I	17.2	-	393
ARIC00031	55380	55448	DNA/Maverick#Polinton-4_PBa	18.2	+	345
ARIC00031	65252	65292	LINE/I#Nimb-2_LG	15	+	4
ARIC00031	65316	79367	DNA/RC#rnd-6_family-3519	3.1	+	15746
ARIC00031	80396	80477	DNA/RC#rnd-6_family-3519	25.9	+	400
ARIC00031	84877	85867	DNA/RC#rnd-6_family-3519	13.528	+	2155
ARIC00031	86659	86740	DNA/RC#rnd-6_family-3519	25.9	+	246
ARIC00031	88617	104017	DNA/RC#rnd-6_family-3519	18.865	-	15660
ARIC00031	90199	90982	DNA/RC#rnd-6_family-3519	10.5	+	1271
ARIC00031	104099	104784	DNA/RC#rnd-6_family-3519	15.5	+	482
ARIC00031	105251	106048	DNA/RC#rnd-6_family-3519	10.3	-	2626
ARIC00031	106904	106962	DNA/RC#rnd-6_family-3519	25.4	+	508
ARIC00031	110392	111498	DNA/RC#rnd-6_family-3519	9.051	-	847
ARIC00031	129097	129344	DNA/hAT-Ac#rnd-6_family-3575	29.6	+	54
ARIC00031	142320	142372	DNA/hAT-Ac#rnd-5_family-2953	18.9	+	80
ARIC00031	142335	142403	PLE/Penelope-Athena#AthX-V-T	23.5	-	89
ARIC00031	156294	156521	LTR/Gypsy#Gypsy-35_CGi-I	26.9	-	79
ARIC00031	167232	167362	DNA#DNA3-14_CGi	23.4	+	9
ARIC00031	170647	170788	LTR/Pao#rnd-6_family-1773	28.6	+	2
ARIC00031	240911	241131	SINE?#rnd-5_family-4379	30.1	-	6
ARIC00031	252615	252688	LTR/Gypsy#Gypsy-16_CGi-I	17.8	+	28
ARIC00031	305212	305254	LTR/Gypsy#Gypsy41-I_AG	9.5	-	0
ARIC00031	328675	328719	LINE/Rex-Babar#Rex1-2_CTe	13.3	-	3
ARIC00031	345419	345531	DNA#DNA4-42B_CGi	23.7	+	1
ARIC00031	389801	389976	DNA/hAT-Ac#rnd-5_family-475	28	+	5
ARIC00031	401409	401451	DNA/Dada#rnd-5_family-636	20.9	+	6
ARIC00031	454787	454819	PLE/Penelope-Athena#AthW	9.1	+	0
ARIC00031	487646	487691	LTR/Juno-Vesta#Juno2_Av	13	-	468
ARIC00031	491457	491578	DNA/Maverick#Polinton-8_NVi	30.8	+	63
ARIC00031	523278	523342	LTR/Gypsy#Gypsy-35_CGi-I	13.4	+	409
ARIC00031	523280	523350	DNA/Crypton#Crypton-1_CTe	28.2	+	409
ARIC00031	523291	523364	DNA/RC#Helitron-9_CGi	27	+	391
ARIC00031	548954	549128	LTR/Ngaro#rnd-5_family-1935	26.1	+	165
ARIC00031	549703	549986	LTR/Ngaro#rnd-5_family-1935	29.7	+	120
ARIC00031	602013	602083	LTR/Gypsy#Gypsy-1_AC-I	23.9	-	27
ARIC00031	602042	602100	DNA/hAT-Blackjack#hAT-4_PBa	14.1	+	22
ARIC00031	602086	602124	LINE/I-Jockey#TART_DV	24.1	-	19
ARIC00031	612473	612526	PLE/Penelope-Athena#AthX-V-T	16.7	-	51
ARIC00031	614730	614869	DNA/Dada#rnd-5_family-636	23.5	+	0
ARIC00031	624098	624156	DNA/Maverick#Polinton-3_LMi	25.4	-	409
ARIC00031	624112	624195	DNA/Kolobok-T2#Kolobok-2_AP	15.9	+	326
ARIC00031	624117	624223	LTR/Gypsy#Gypsy6-NVi_LTR	26.4	+	325
ARIC00031	625213	625273	DNA/PIF-Harbinger#Harbinger-5_CGi	18	-	398
ARIC00031	637678	637936	LTR/Pao#rnd-6_family-1773	26.2	-	127
ARIC00032	53638	53690	LTR/Gypsy#Gypsy-23_CGi-I	13.2	+	92
ARIC00032	57242	57367	DNA/Maverick#Polinton-8_NVi	24.7	+	22
ARIC00032	74156	74222	DNA/TcMar-Tc1#Mariner-62_HSal	25.4	+	479
ARIC00032	77505	77582	DNA/hAT-Ac#rnd-5_family-929	17.9	+	15
ARIC00032	108969	109183	LTR/ERV1#rnd-5_family-199	31.6	+	126
ARIC00032	115680	115740	DNA/Crypton#Crypton-1_CTe	21.3	+	201
ARIC00032	117550	117635	DNA/Maverick#Polinton-3_PBa	20.2	+	80
ARIC00032	151480	151558	DNA/hAT-Ac#rnd-5_family-475	17.1	-	19
ARIC00032	180666	180758	LTR/Unknown#ltr-1_family-9	23.9	-	123
ARIC00032	189522	189682	LINE/I-Jockey#TART_DV	20.6	+	551
ARIC00032	209415	209471	LTR/Gypsy#Gypsy-2_DVir-I	12.2	+	0
ARIC00032	244870	244924	LTR/Pao#rnd-5_family-2230	22.7	+	6
ARIC00032	256829	256924	PLE/Penelope-Athena#AthK-V	17.3	-	12
ARIC00032	281633	300667	LTR/ERV1#rnd-5_family-199	2.6	-	16118
ARIC00032	329037	329078	LTR/Pao#BEL-79_CQ-I	16.7	+	29
ARIC00032	339186	339295	DNA/RC#rnd-6_family-3519	21.8	+	76125
ARIC00032	342919	343027	DNA/RC#rnd-6_family-3519	21.1	-	44488
ARIC00032	345829	345908	DNA/RC#rnd-6_family-3519	30	+	84857
ARIC00032	348817	348894	DNA/RC#rnd-6_family-3519	25.6	+	8592
ARIC00032	349674	349775	DNA/RC#rnd-6_family-3519	28.4	-	221318
ARIC00032	355587	355622	DNA/Dada#rnd-5_family-636	3	-	1
ARIC00032	360478	360511	LTR/Copia#Copia-2_LMi-I	11.8	-	24
ARIC00032	429909	429979	LTR/Gypsy#rnd-5_family-130	24.6	+	37
ARIC00032	429934	429980	PLE/Penelope-Athena#AthX-V-T	17	+	33
ARIC00032	440484	440520	PLE/Penelope-Athena#AthW	13.5	-	21
ARIC00032	461737	461823	DNA/hAT-Ac#rnd-5_family-929	20.2	+	2
ARIC00032	463491	463549	PLE/Penelope-Athena#AthW2-2	20.3	-	86
ARIC00032	597178	597260	LTR/Gypsy#Gypsy-616_AA-I	23.8	+	0
ARIC00032	627579	627601	DNA/RC#rnd-6_family-3519	20.6	-	0
ARIC00032	630288	630349	DNA/Crypton#Crypton-1_CTe	21	+	27
ARIC00032	632591	632629	LTR/Gypsy#Gypsy-256_AA-I	15.4	-	9
ARIC00033	11873	12787	LTR/Ngaro#rnd-5_family-1935	25.6	+	2957
ARIC00033	80948	81033	DNA/Maverick#Polinton-9_NVi	21.2	+	0
ARIC00033	98567	98721	SINE?#rnd-4_family-826	30.5	+	1179
ARIC00033	99682	99757	LTR/Pao#rnd-6_family-1773	15.8	-	48751
ARIC00033	107847	107950	LTR/Gypsy#Gypsy-91_CQ-I	26.1	-	105
ARIC00033	139251	139316	DNA/MULE-MuDR#rnd-5_family-1620	10.6	+	7
ARIC00033	139709	139793	DNA/TcMar-Mariner#rnd-5_family-1209	27.1	-	15
ARIC00033	140081	140108	DNA/TcMar-Mariner#rnd-5_family-1209	27.3	+	5
ARIC00033	140657	140800	LTR/Unknown#ltr-1_family-6	4.9	-	6
ARIC00033	152841	152881	LTR/Copia#Copia1-NVi_I	14.6	+	892
ARIC00033	185377	185465	DNA/PIF-Spy#ISL2EU-1_LHu	38.6	+	26
ARIC00033	185421	185470	DNA/Kolobok-T2#REP-4_PBa	18	+	29
ARIC00033	186369	186902	DNA/TcMar-Pogo#rnd-5_family-540	24.467	-	2
ARIC00033	187732	187800	DNA/Maverick#Polinton-4_PBa	14.9	-	149
ARIC00033	224779	224813	LINE/R2-NeSL#Utopia-1_PRe	17.1	-	49
ARIC00033	236389	236663	LTR/Gypsy#Gypsy-43_DWil-I	24.4	-	423
ARIC00033	236558	236862	LTR/Gypsy#Gypsy-43_DWil-I	23.9	-	453
ARIC00033	236675	236900	LTR/Gypsy#Gypsy-43_DWil-I	22.9	-	388
ARIC00033	262765	263233	DNA/hAT#hAT27_Av	30.507	+	0
ARIC00033	283467	283583	DNA/Maverick#Polinton-8_NVi	26.2	+	1
ARIC00033	317590	317642	DNA/Crypton#Crypton-1_CTe	17	+	7
ARIC00033	317596	317680	LTR/Gypsy#Gypsy61-I_AG	18.4	-	7
ARIC00033	368663	368673	DNA/TcMar-Tc4#Mariner3-4_LMi	22.3	+	6
ARIC00033	375222	376304	LINE/I-Jockey#rnd-5_family-704	11.617	+	60
ARIC00033	428284	428337	LTR/Copia#DM1731_LTR	15.1	+	83
ARIC00033	432323	432349	DNA#rnd-5_family-4923	15.5	-	24
ARIC00033	432355	432405	DNA/hAT-Tip100#hAT-15_HRo	13.7	-	31
ARIC00033	441711	441767	LTR/Gypsy#Gypsy61-I_AG	21.1	+	116
ARIC00033	451163	451251	LTR/Gypsy#Gypsy-13_DVir-I	19.8	-	0
ARIC00033	452529	452609	LTR/Unknown#ltr-1_family-17	16.9	+	15
ARIC00033	465950	465980	DNA/PiggyBac#piggyBac-N11_LMi	9.7	-	421
ARIC00033	468521	468562	DNA/Kolobok#Kolobok3_Av	9.8	-	279
ARIC00033	520022	520087	DNA/PIF-Harbinger#Turmoil1	17.8	-	1
ARIC00033	525036	525084	LINE/L2#L2-8_NVi	12.2	-	0
ARIC00033	525085	525096	DNA/Kolobok-T2#Kolobok-2_AP	22.9	+	0
ARIC00033	532758	532803	LTR/Copia#Copia-59_AA-I	21.7	+	93
ARIC00033	539996	540056	DNA/RC#Pr_Helitron1	16.5	+	2
ARIC00033	574788	574825	LTR/Gypsy#rnd-5_family-2148	15.8	+	30
ARIC00033	603273	603342	LINE/I-Jockey#TART_DV	25.7	+	660
ARIC00033	634290	634333	LTR/Gypsy#Gypsy-18_AA-I	14	-	1
ARIC00034	29395	29415	PLE/Penelope-Athena#AthK-V	25.8	+	38
ARIC00034	29416	29452	DNA/hAT-Ac#rnd-5_family-929	10.8	-	33
ARIC00034	34659	34772	LTR/Gypsy#Gypsy37-I_AG	25.7	+	6782
ARIC00034	120286	143426	LTR/Gypsy#rnd-6_family-954	2.001	-	32380
ARIC00034	163646	164665	DNA/hAT-Ac#rnd-1_family-3	22.4	-	835
ARIC00034	224611	224659	DNA#DNA7-1_CGi	19.6	+	149
ARIC00034	225243	225309	LTR/Gypsy#Gypsy61-I_AG	22.4	+	360
ARIC00034	225679	225738	DNA/Crypton#Crypton_Av	20	-	725
ARIC00034	289784	289815	LINE/L2#Kiri-17_AAe	9.4	-	43
ARIC00034	304431	304472	DNA/Kolobok-Hydra#Kolobok-1_PBa	19.1	-	4
ARIC00034	334254	334306	LTR/Gypsy#Gypsy-26_CT-I	19.2	-	2
ARIC00034	352301	352396	DNA/Maverick#Polinton-2_ACe	26.4	+	116
ARIC00034	353540	353576	LTR/Gypsy#Gypsy-279_AA-I	8.9	-	236
ARIC00034	354434	354575	LTR/Pao#BEL-230_AA-I	30.7	-	33
ARIC00034	361438	361452	DNA/PiggyBac-PB#AvPB3	21.3	+	31
ARIC00034	382009	382081	DNA/RC#Helitron-N3_CGi	14.5	-	4
ARIC00034	424078	424152	LTR/Gypsy#Gypsy-183_AA-I	17.6	+	17
ARIC00034	438828	438889	DNA/Zisupton#rnd-4_family-860	13.3	-	9
ARIC00034	475966	476069	PLE/Penelope#Penelope1_Av	17.3	+	2
ARIC00034	479052	479098	DNA/hAT-Tip100#hAT-15_HRo	13.1	-	322
ARIC00034	485424	485506	DNA/hAT-Tip100#hAT-24_LMi	19.3	+	687
ARIC00034	514228	514414	LTR/Unknown#ltr-1_family-25	9	-	12
ARIC00034	514355	514665	LTR/Gypsy#ltr-1_family-24	7.7	-	28
ARIC00034	515757	515939	DNA/MULE-MuDR#rnd-5_family-3876	24	+	22
ARIC00034	516215	516338	LTR/Gypsy#rnd-5_family-300	25.2	-	9
ARIC00034	524590	524643	DNA/CMC-EnSpm#EnSpm-1_AA	20.4	-	43
ARIC00034	540930	561873	LTR/Gypsy#rnd-5_family-130	20.924	-	7025
ARIC00034	563458	563497	DNA/Sola-1#Sola1-N1_LSal	12.5	+	3
ARIC00034	567868	568073	LTR/Unknown#ltr-1_family-6	3.9	-	4
ARIC00034	588914	588958	DNA/TcMar-m44#Mariner-N9_LMi	22.2	-	6893
ARIC00034	616414	616491	DNA/Kolobok-T2?#Kolobok-N1_AEc	22	-	392
ARIC00034	634056	635581	DNA/MULE-MuDR#rnd-5_family-3876	3	+	33
ARIC00035	991	1057	DNA/Kolobok-T2#REP-4_PBa	22.7	-	27
ARIC00035	1019	1078	DNA/TcMar-Tc1#Mariner-62_HSal	21.7	-	19
ARIC00035	47214	48176	LINE/L2#rnd-5_family-1522	30.2	+	21
ARIC00035	52159	54975	DNA/P#P10_Av	29.326	+	68
ARIC00035	71121	71409	DNA/Ginger#Ginger2c_Av	28.3	-	2
ARIC00035	71465	71692	DNA/Ginger#Ginger2c_Av	25.6	+	3
ARIC00035	79515	79775	LTR/Unknown#ltr-1_family-8	35.2	+	138
ARIC00035	82513	82552	DNA/MULE-MuDR#MULE2_Av	7.5	+	7
ARIC00035	86063	86154	DNA/RC#rnd-6_family-3519	5.5	-	0
ARIC00035	104424	104561	DNA/Merlin#Merlin1_Av	27.3	-	7
ARIC00035	136066	136105	LINE/I-Jockey#Jockey-2_DEl	12.8	+	11
ARIC00035	191225	191302	LTR/Pao#BEL-199_AA-I	20.6	+	1
ARIC00035	208321	208391	LINE/R1#R1-2_DWi	21.4	+	486
ARIC00035	208846	208899	LTR/Pao#BEL-2_AEc-I	24.5	-	0
ARIC00035	213414	213472	LTR/Gypsy#TABOR_DA-I	15.2	-	15
ARIC00035	219588	219703	DNA/TcMar-Tc1#rnd-1_family-107	18.4	-	0
ARIC00035	220400	220515	DNA/TcMar-Tc1#rnd-1_family-107	17.5	+	0
ARIC00035	248366	251703	DNA/hAT-Ac#rnd-5_family-2953	28.964	+	1351
ARIC00035	257416	257632	PLE/Penelope-Athena#AthJ-N-W1	30	-	0
ARIC00035	257939	258134	PLE/Penelope-Athena#AthJ-N-W1	28	+	3
ARIC00035	269927	270049	PLE/Penelope-Athena#AthL3	28.4	-	19
ARIC00035	291156	291195	PLE/Penelope-Athena#AthW2-1	17.5	+	97
ARIC00035	337843	337886	LTR/Gypsy#Gypsy-273_AA-I	12.3	-	5
ARIC00035	352076	352553	LINE/I-Jockey#rnd-5_family-1249	5.5	-	97
ARIC00035	376340	376386	LTR/Gypsy#Gypsy-6_AEc-LTR	23.4	-	115
ARIC00035	381454	381561	LTR/Gypsy#Gypsy8-I_Dpse	25.2	+	18
ARIC00035	394483	394553	LTR/Gypsy#Gypsy-26_DYa-I	22.8	+	330
ARIC00035	396882	396953	LINE/CR1#CR1-90_AAe	6.7	-	9483
ARIC00035	404729	404784	LINE/I-Jockey#TART_DV	16.7	-	91
ARIC00035	443359	443414	LINE/R2-Hero#HERO-4_HR	25	-	6
ARIC00035	446310	446341	PLE/Penelope-Athena#AthX-V-T	6.2	+	90
ARIC00035	473775	474461	LINE/Soliton#Soliton6_Av	32	+	16
ARIC00035	476696	476757	LTR/Gypsy#STALKER4_I	13.5	+	2530
ARIC00035	485128	485222	LTR/Pao#rnd-6_family-1773	26.3	+	122
ARIC00035	492900	492963	DNA/RC#rnd-6_family-3519	22.6	+	2
ARIC00035	512280	512583	LINE/I-Jockey#Jockey-3_DGri	23.5	-	3
ARIC00035	512349	513036	LINE/R1#RT1	25.8	-	1
ARIC00035	513392	513789	LINE/I-Jockey#Ag-Jock-1	17.5	-	0
ARIC00035	513399	513849	LINE/R1#RTAg4	21.5	-	0
ARIC00035	523671	523761	LTR/Gypsy#rnd-5_family-2108	26.4	+	106
ARIC00035	559421	559480	LINE/L1#rnd-5_family-2546	18.6	-	288
ARIC00035	589584	589636	DNA/Kolobok-T2#REP-4_PBa	19.2	-	0
ARIC00035	629749	629843	LTR/ERV1#rnd-5_family-199	20.5	-	85
ARIC00035	632487	632692	LINE/I-Jockey#rnd-5_family-704	15.9	-	10
ARIC00036	17889	18306	LINE/I-Jockey#rnd-5_family-1249	7.528	+	197
ARIC00036	92988	93035	LTR/Gypsy#Gypsy-594_AA-I	14.9	+	57
ARIC00036	125619	125684	LTR/Pao#BEL-7_DPu-I	19.1	+	0
ARIC00036	160561	160621	LTR/Gypsy#Gypsy-1_DVir-I	26.2	-	236
ARIC00036	161690	161789	LTR/Pao#BEL-6_CGi-I	28	-	156
ARIC00036	174064	174153	LINE/RTE-BovB#rnd-6_family-3671	25.6	-	243
ARIC00036	189648	189686	LTR/Pao#BEL-1_DBp-I	7.9	+	69
ARIC00036	216793	216846	LINE/I-Jockey#Jockey-2_DRh	12.7	-	8
ARIC00036	254909	254973	DNA/IS3EU#IS3EU-N1_CGi	19.4	-	59
ARIC00036	285673	285718	PLE/Penelope-Athena#AthW2-2	19.6	-	136
ARIC00036	285716	285816	LTR/Gypsy#Gypsy37-I_AG	24.3	-	163
ARIC00036	290969	291085	PLE/Penelope#Penelope-9_HRo	23.2	+	63
ARIC00036	290998	291092	LINE/I-Jockey#TART_DV	19.6	+	63
ARIC00036	308964	309046	LINE/L1-Tx1#Tx1-11_CGi	21.7	+	10
ARIC00036	308982	309073	DNA/Maverick#Polinton-9_NVi	26.4	+	55
ARIC00036	318373	318419	LTR/Pao#BEL-224_AA-I	13.1	+	3649
ARIC00036	351964	352073	DNA/P#AgaP15	21.9	-	242
ARIC00036	355466	355524	DNA/Maverick#Polinton-1_PBa	20.3	+	77
ARIC00036	397327	397361	LINE/R1#RT1	14.3	-	247
ARIC00036	421822	421876	DNA/Maverick#Polinton-1_PBa	27.3	-	11
ARIC00036	422028	422100	LTR/Gypsy#Gypsy6-NVi_LTR	16.4	+	9
ARIC00036	422029	422112	DNA/P#P-1_LHu	17.1	-	9
ARIC00036	422036	422124	DNA/P#P-1_LHu	14.6	+	9
ARIC00036	465065	465140	DNA/hAT-Ac#rnd-5_family-2953	15.1	+	1
ARIC00036	478653	478718	LTR/Gypsy#Gypsy6-I_Dmoj	24.2	+	40
[truncated: 15,718 more rows]

## Sheet: Av2013
AVAG00001	549	696	DNA/hAT-Tip100#rnd-6_family-1597	29.2	-	473
AVAG00001	13225	13285	LTR/Gypsy#Gypsy1-I_DM	21.7	+	22
AVAG00001	35036	35139	LTR/Gypsy#Gypsy-35_CGi-I	28	-	296
AVAG00001	61393	61519	LTR/Unknown#ltr-1_family-3	2.4	-	0
AVAG00001	66331	66486	LTR/Gypsy#Gypsy61-I_AG	28.8	-	383
AVAG00001	66434	66525	DNA/PIF-Harbinger#rnd-5_family-455	25.4	+	295
AVAG00001	68947	68978	DNA/hAT#hAT4_Av	12.5	-	479
AVAG00001	76879	76940	LTR/Gypsy#Gypsy-173_AA-I	25.8	+	0
AVAG00001	80609	80670	LTR/Gypsy#Gypsy-173_AA-I	25.8	+	0
AVAG00001	88007	88221	DNA/MULE-MuDR#MuDR6_Av	12.6	-	0
AVAG00001	93374	93427	DNA/PiggyBac#piggyBac7_Av	18.5	-	0
AVAG00001	105880	105974	DNA/Kolobok-Hydra#Kolobok-7_CGi	13.5	+	1
AVAG00001	106657	106718	DNA/Maverick#Polinton-1_PBa	22.1	+	1
AVAG00001	139272	139498	DNA/PIF-Harbinger#rnd-5_family-455	29.2	-	79
AVAG00001	141092	141137	LINE/L1#L1-17_LSal	17.4	+	94
AVAG00001	145993	146057	PLE/Penelope#Penelope-5_HRo	18.5	+	81
AVAG00001	153510	153547	DNA/CMC-EnSpm#EnSpm1_Av	13.2	-	9
AVAG00001	156080	156186	DNA/RC#rnd-5_family-1739	29.2	-	9
AVAG00001	158916	158962	LINE/L2#Crack-14_AAe	17	-	0
AVAG00001	173205	173257	LTR/Pao#BEL-233_AA-I	19.2	+	24
AVAG00001	196773	197007	DNA#rnd-5_family-3897	26.423	-	9
AVAG00001	235605	235665	LTR/Ngaro#rnd-6_family-5248	19.7	-	105
AVAG00001	243637	243672	LINE/L2#L2-8_NVi	16.7	+	1
AVAG00001	268688	268726	DNA/hAT-Ac#hAT-3_DBp	20.4	-	17
AVAG00001	283513	283608	DNA/Maverick#Polinton-3_TC	25.8	+	27
AVAG00001	289123	289186	DNA/IS3EU#IS3EU-N1_CGi	20.3	-	81
AVAG00001	291635	291722	DNA#DNA3-10_CGi	26.8	-	28
AVAG00001	328094	328154	LTR/Copia#Copia-28_SI-I	19.4	-	0
AVAG00001	362663	362718	LINE/L2#Daphne-3_CTe	14.3	-	5
AVAG00001	362674	362741	DNA/hAT-Blackjack#hAT-4_PBa	13.6	-	6
AVAG00001	364292	364330	LTR/ERV1#rnd-5_family-4770	10.3	+	14
AVAG00001	365517	365554	LTR/Gypsy#rnd-5_family-1179	7.9	-	7
AVAG00001	367593	367657	LTR/Gypsy#Gypsy68-I_AG	21.5	-	0
AVAG00001	419143	419218	DNA/PIF-Harbinger#DNA3-13B_CGi	9.2	-	0
AVAG00001	437800	437851	DNA/MULE-MuDR#MuDR3_Av	11.5	-	24
AVAG00001	439585	439656	DNA/RC#Helitron-3N1_NVi	22.2	+	4
AVAG00001	456922	457116	DNA#rnd-5_family-3897	24	-	25
AVAG00001	462364	462425	PLE/Penelope-Athena#AthJ-W	11.3	-	5
AVAG00001	497455	497553	PLE/Penelope#Penelope-5_HRo	19.2	-	66
AVAG00001	517539	517607	LINE/I#I-7B_AAe	22.4	-	1
AVAG00001	528832	528905	LINE/R2-NeSL#Utopia-1_DPu	24	+	0
AVAG00001	537881	537931	DNA/Crypton#Crypton_Av	17.6	-	305
AVAG00001	544169	544379	DNA/hAT-Ac#rnd-5_family-2166	20.2	-	83
AVAG00001	578277	578337	PLE/Penelope-Athena#AthJ-W	5.3	-	4
AVAG00001	594104	594200	LINE/L2#L2-8_NVi	23.9	-	423
AVAG00001	594140	594221	DNA/RC#Helitron-N1_PBa	17.1	+	243
AVAG00001	595586	595625	LTR/Pao#rnd-5_family-4074	5	+	0
AVAG00001	636096	636132	DNA/TcMar-Tc1#Mariner-62_HSal	8.1	-	55
AVAG00001	645492	645558	DNA#DNA6-9_CGi	12.3	-	0
AVAG00001	645508	645564	DNA/RC#Helitron-N34_CGi	12.3	+	0
AVAG00001	645510	645574	PLE/Penelope#Nematis_Cr	16.9	+	0
AVAG00001	678952	679030	PLE/Penelope-Athena#AthK-V	23.1	+	89
AVAG00001	678981	679043	LINE/L2#Daphne-38_HRo	23	-	88
AVAG00001	696613	696741	LINE/CR1#CR1-2_CQ	28.2	-	155
AVAG00001	698823	698917	LTR/Pao#BEL2-I_Dmoj	22.5	+	228
AVAG00001	708909	709031	DNA/Crypton#Crypton-1_CTe	13.3	+	0
AVAG00001	724626	724704	DNA/Kolobok-T2?#Kolobok-N1_AEc	17.7	-	215
AVAG00001	751678	751790	LTR/ERV1#rnd-5_family-4770	29.7	-	14
AVAG00001	772785	772821	LINE/L2#Daphne-17_HRo	8.1	-	0
AVAG00001	798975	799043	DNA/hAT-Charlie#hAT-7_LMi	21.7	-	33
AVAG00001	819566	819696	DNA#DNA-8_CTe	22.3	+	0
AVAG00001	823148	823201	DNA#DNA3-10_CGi	14.8	-	0
AVAG00001	853342	853393	DNA/Maverick#Polinton-9_NVi	23.1	+	412
AVAG00001	870151	870227	PLE/Penelope-Athena#AthJ-N	22.9	+	169
AVAG00001	870225	870258	LTR/ERV1#rnd-5_family-4770	28.7	-	151
AVAG00001	873339	873412	DNA/Maverick#Polinton-1_CTe	10.3	+	43
AVAG00001	876821	876905	DNA/RC#Helitron-N1_PBa	21	-	2
AVAG00001	876841	876915	LTR/Copia#Copia-65_AA-I	22.7	-	2
AVAG00001	876853	876925	DNA/Maverick#Polinton-1_NVi	19.4	-	3
AVAG00001	876916	876932	LTR/Gypsy#Gypsy-10_DVir-LTR	24.2	+	2
AVAG00001	876926	876967	DNA/Sola-2#Sola2-3_DPu	21.2	-	2
AVAG00001	878347	878410	LINE/I#I-7B_AAe	26.6	+	1
AVAG00001	879755	879800	LTR/Gypsy#Gypsy-10_DVir-LTR	13	+	49
AVAG00001	880026	880078	LINE/L2#L2-8_NVi	18.9	+	53
AVAG00001	887600	887610	LINE/L2#L2-19_CTe	20	+	10
AVAG00001	887611	887679	PLE/Penelope#Penelope-5_HRo	18.8	-	15
AVAG00001	887629	887689	LTR/Gypsy#Gypsy3-LTR_AP	11.9	+	15
AVAG00001	907124	907213	LTR/Gypsy#Gypsy-168_AA-I	25.3	+	16
AVAG00001	933694	933754	DNA/hAT-Charlie#hAT-9_LMi	11.6	-	23
AVAG00001	956214	956449	LTR/Unknown#ltr-1_family-24	9.8	-	1
AVAG00001	987801	987871	DNA/hAT-Tip100#hAT-15_HRo	19.7	+	81
AVAG00001	996704	996752	DNA/MULE-MuDR#MuDr-2x_AP	14.6	-	280
AVAG00001	1026620	1026706	DNA/RC#Helitron-N1_PBa	17.2	-	0
AVAG00001	1026621	1026717	DNA/Kolobok-T2?#Kolobok-N1_AEc	21	-	0
AVAG00001	1027909	1027921	DNA/hAT-Charlie#hAT-9_HRo	28.7	-	0
AVAG00001	1027922	1028015	DNA/Kolobok-T2?#Kolobok-N1_AEc	18.3	-	0
AVAG00001	1027928	1028052	DNA/P#P-1_DBp	21.6	-	0
AVAG00001	1031062	1031131	DNA/Sola-1#Sola1-1_AC	25.7	+	87
AVAG00001	1031092	1031138	LINE/L2#L2-8_NVi	6.7	-	74
AVAG00001	1033070	1033114	LTR/Pao#ROO_I	15.6	+	33
AVAG00001	1033204	1033321	DNA/Sola-1#Sola1-1_AC	25.6	-	224
AVAG00001	1033237	1033325	PLE/Penelope#Penelope-83_LMi	22.2	+	225
AVAG00001	1033277	1033338	DNA/TcMar-Tc1#TSESSEBEII	18	-	257
AVAG00001	1067375	1067461	DNA/TcMar-Tc1#rnd-5_family-77	22.1	-	0
AVAG00001	1071734	1071770	PLE/Penelope-Athena#AthX-V-T	8.1	+	41
AVAG00001	1071745	1071786	PLE/Penelope-Athena#AthW1	11.9	+	39
AVAG00001	1071787	1071798	LINE/L2#L2B-4B_AAe	18.9	-	28
AVAG00001	1073678	1073757	DNA/IS3EU#IS3EU-N1_CGi	27.5	-	6
AVAG00002	11918	11973	DNA/Crypton-V#CryptonV-1_HSal	26.8	-	7
AVAG00002	12324	12379	DNA/Crypton-V#CryptonV-1_HSal	25	-	7
AVAG00002	37636	37738	PLE/Penelope#Penelope-9_HRo	23.8	+	450
AVAG00002	38037	38121	DNA/RC#Helitron-N1_PBa	21.2	-	143
AVAG00002	38054	38127	LINE/L2#L2-8_NVi	18.9	-	135
AVAG00002	47528	47578	SINE/tRNA-Meta#HalSINE1	18	-	0
AVAG00002	47537	47593	DNA/TcMar-Tc1#Mariner-62_HSal	15.8	-	0
AVAG00002	57167	57244	PLE/Penelope-Athena#AthK-V	26.8	+	24
AVAG00002	65110	71773	LTR/Ngaro#rnd-6_family-5248	21.066	-	1444
AVAG00002	67593	67632	LINE/R2#R2Amel	10	+	75
AVAG00002	73555	79233	LTR/Ngaro#rnd-6_family-5248	22.27	-	47
AVAG00002	85538	85567	DNA/MULE-MuDR#MuDR3_Av	3.3	+	27
AVAG00002	86542	90181	LTR/Ngaro#rnd-6_family-5248	25.68	-	225
AVAG00002	93680	93714	LINE/L1-Tx1#L1-2_CQ	17.1	-	12
AVAG00002	95685	95729	DNA/Ginger#Ginger2d_Av	11.1	-	2
AVAG00002	97275	97323	DNA/TcMar-Fot1#Mariner-24_CGi	14.3	+	0
AVAG00002	101457	101542	DNA/RC#Helitron-N1_PBa	19.8	+	16
AVAG00002	112047	113158	DNA/RC#rnd-5_family-6308	26.545	+	3186
AVAG00002	156461	156536	DNA/hAT-Charlie#hAT-N24_LSal	23.7	+	0
AVAG00002	162627	162722	DNA/Crypton#Crypton-1_CTe	23	+	0
AVAG00002	214408	214460	DNA/CMC-EnSpm#EnSpm2_Av	19.2	+	0
AVAG00002	227939	228003	DNA#DNA-11_CGi	15.4	-	0
AVAG00002	242640	242696	LTR/Gypsy#rnd-5_family-1179	22.8	+	23
AVAG00002	261693	261777	DNA/hAT#hAT21_Av	21.4	+	63
AVAG00002	271917	271956	DNA/RC#rnd-5_family-1739	15	+	1
AVAG00002	272061	272106	LTR/ERV1#rnd-5_family-4770	16.4	-	55
AVAG00002	272066	272114	LTR/Gypsy#Gypsy37-I_AG	16.7	+	55
AVAG00002	272072	272127	DNA/Maverick#Polinton-1_PBa	18.2	-	62
AVAG00002	291314	291396	DNA/TcMar-Tc1#Mariner-N22_AG	24.5	+	49
AVAG00002	377324	377379	DNA/Sola-2#Sola2-4_LMi	23.2	+	0
AVAG00002	377653	377735	DNA/RC#Helitron-N2_PBa	24.6	-	0
AVAG00002	384540	384683	LTR/Gypsy#Gypsy61-I_AG	29.4	+	9
AVAG00002	421398	421481	PLE/Penelope#Penelope-58_LMi	19.8	-	6
AVAG00002	425164	425268	DNA/MULE-MuDR#MULE2_Av	25	-	0
AVAG00002	428407	428438	LINE/CR1#CR1_Ele38	12.5	+	36
AVAG00002	451088	451148	DNA/RC#Helitron-3N1_NVi	19.7	+	0
AVAG00002	451113	451163	LTR/Copia#Copia-65_AA-I	16	+	0
AVAG00002	461863	461913	DNA/IS3EU#IS3EU-N1_CGi	10.4	-	43
AVAG00002	468282	468325	DNA/MULE-MuDR#MuDR-2_CGi	11.9	-	16
AVAG00002	470897	471234	LTR/Unknown#ltr-1_family-12	25.72	-	27
AVAG00002	482753	482797	LINE/L1#L1-46_AAe	11.4	+	96
AVAG00002	492154	492168	LTR/Gypsy#Gypsy6-NVi_LTR	18.6	+	1
AVAG00002	492160	492232	LTR/ERV1#rnd-5_family-4770	23.3	+	1
AVAG00002	492169	492238	DNA/RC#Helitron-N1_PBa	11.4	+	1
AVAG00002	492189	492255	DNA/hAT-Charlie#hAT-11_HRo	15.2	+	1
AVAG00002	501603	501642	DNA/RC#rnd-5_family-6308	10	+	295
AVAG00002	559203	559270	PLE/Penelope-Athena#AthW2-1	21.2	-	197
AVAG00002	588103	588156	SINE/tRNA-RTE#SINE2-2_LMi	14.8	-	168
AVAG00002	601514	601588	PLE/Penelope-Athena#AthJ-N-W1	10.9	+	79
AVAG00002	632729	632777	DNA/hAT#hAT26_Av	22.4	-	0
AVAG00002	634625	634674	LTR/Pao#BEL-227_AA-I	22	-	43
AVAG00002	637456	637575	DNA/RC#rnd-5_family-1739	26.7	+	83
AVAG00002	637511	637607	LTR/Gypsy#Gypsy61-I_AG	26.8	-	74
AVAG00002	645273	645363	LTR/Gypsy#Gypsy-8_CFl-LTR	23.9	-	29
AVAG00002	665382	665423	DNA/Kolobok-T2#Kolobok-2_AP	16.7	-	5
AVAG00002	688499	688575	LTR/Gypsy#rnd-6_family-4491	20.9	+	80
AVAG00002	697072	697174	LTR/Gypsy#Gypsy-38_NVi-LTR	27.6	-	0
AVAG00002	706478	706686	LTR/Gypsy#rnd-5_family-1179	25.1	-	63
AVAG00002	727739	727815	LTR/Gypsy#Gypsy15-I_AG	22.2	+	4
AVAG00002	737430	737467	DNA/PiggyBac#piggyBac-N10_LMi	10.8	-	10
AVAG00002	737789	737827	LTR/Gypsy#Gypsy-40_LMi-LTR	7.9	-	17
AVAG00002	739366	739432	DNA/hAT-Tip100#hAT-6_HRo	18.2	+	5
AVAG00002	739367	739486	LTR/Gypsy#Gypsy6-NVi_LTR	29.4	-	5
AVAG00002	742762	742812	LINE/L2#Daphne-7_HMM	17.6	-	7
AVAG00002	746887	746947	LTR/Gypsy#Gypsy-1_LVa-LTR	13.1	+	15
AVAG00002	756508	756569	LINE/I-Jockey#Jockey-5_DBp	18.7	-	0
AVAG00002	762664	762734	DNA/RC#rnd-5_family-6308	15.5	+	13
AVAG00002	831061	831143	LTR/Ngaro#rnd-6_family-5579	23.2	+	187
AVAG00002	863385	863415	LTR/Gypsy#Gypsy-14_DPu-I	3.2	-	84
AVAG00002	878257	878326	LINE/L2#L2-8_NVi	18.8	+	56
AVAG00002	878282	878356	LTR/Gypsy#Gypsy10-I_AG	24	-	24
AVAG00002	878722	878794	DNA/PIF-ISL2EU#ISL2EU-8_CGi	25	+	40
AVAG00002	878738	878830	PLE/Penelope-Athena#AthW	23.1	+	44
AVAG00002	892869	892928	LINE/R2-Hero#HERO-3_HR	20	-	0
AVAG00002	903649	903692	PLE/Penelope#Penelope-1_LHu	20.4	-	112
AVAG00002	914056	914106	DNA/Maverick#Polinton-1_ACe	14.3	-	16
AVAG00002	914159	914204	LTR/ERV1#rnd-5_family-4770	13.7	+	15
AVAG00002	915714	915785	LTR/Pao#BEL-206_AA-I	16.2	-	18
AVAG00002	927464	927550	LTR/Gypsy#Gypsy-29_CT-I	29.9	+	0
AVAG00002	927511	927582	PLE/Penelope#Penelope-5_HRo	23.9	+	0
AVAG00002	934458	938519	LINE/I-Jockey#TART_DV	21.054	+	2588
AVAG00002	946333	946428	PLE/Penelope-Athena#AthV-L1	20.1	-	4
AVAG00002	962052	962473	DNA#rnd-5_family-3897	32.195	+	11
AVAG00003	24424	24516	DNA/RC#Helitron-9_CGi	22.8	-	371
AVAG00003	26739	26786	LINE/L2#L2-8_NVi	12.5	-	185
AVAG00003	26787	26808	DNA/hAT-Blackjack#hAT-4_PBa	23.2	-	146
AVAG00003	30769	30836	LINE/L2#Daphne-14_HRo	13.9	+	14
AVAG00003	30968	31028	DNA/Maverick#Polinton-4_PBa	13.8	-	4
AVAG00003	35733	35836	DNA/Maverick#Polinton-8_NVi	30.8	+	0
AVAG00003	42821	43072	DNA/Kolobok-H#rnd-6_family-4463	29.9	-	72
AVAG00003	44851	45455	DNA/MULE-MuDR#MULE5_Av	13.254	-	0
AVAG00003	102084	102136	DNA/TcMar-Tc4#TC5	22.1	+	999
AVAG00003	104544	104611	DNA/RC#Helitron-N1_PBa	16.2	-	0
AVAG00003	122719	122769	LTR/Pao#BEL-17_DEl-I	14.7	+	86
AVAG00003	144853	144923	PLE/Penelope#Penelope-5_HRo	17.4	+	207
AVAG00003	191808	191878	LTR/Gypsy#Gypsy-13_CFl-I	23.6	+	63
AVAG00003	238940	239001	DNA/TcMar-Tc1#Mariner-N6_SIn	21.3	-	0
AVAG00003	239447	239499	DNA/Kolobok-H#rnd-6_family-4463	17.3	-	70
AVAG00003	242766	242814	LTR/Gypsy#Gypsy-7_ACe-LTR	14.3	-	53
AVAG00003	242801	242913	DNA/PIF-Spy#ISL2EU-N1_CGi	21.8	+	53
AVAG00003	267938	267993	LTR/Ngaro#rnd-6_family-5579	14.6	+	221
AVAG00003	291560	291602	LINE/I#Nimb-27_LMi	14.3	+	106
AVAG00003	294937	294992	PLE/Penelope-Athena#AthJ-N	12.5	-	93
AVAG00003	297490	297529	DNA/PiggyBac#npiggyBac-2_Hmel	12.5	+	0
AVAG00003	306838	306931	LINE/L2#Daphne-7_CTe	20.8	-	0
AVAG00003	334126	334228	DNA/MULE-MuDR#MuDR6_Av	25	+	0
AVAG00003	336284	336391	DNA/Crypton#Crypton-1_CTe	23.4	+	212
AVAG00003	341877	341952	DNA/IS3EU#IS3EU-N1_CGi	27.1	-	67
AVAG00003	365356	365414	LTR/Gypsy#Gypsy-66_LMi-I	12.5	+	6
AVAG00003	370854	370891	DNA/CMC-Chapaev-3#Chapaev3-1_HR	7.9	+	0
AVAG00003	372641	372713	DNA#DNA2-10_CGi	24.3	+	0
AVAG00003	377317	377364	DNA/hAT-Ac#hAT-2_CGi	25	+	15
AVAG00003	378407	378478	DNA/RC#rnd-5_family-1739	20.8	-	8
AVAG00003	378408	378499	LTR/Gypsy#Gypsy-35_CGi-I	32	-	8
AVAG00003	380700	380731	DNA/Kolobok-H#rnd-6_family-1024	9.4	+	6
AVAG00003	397698	397771	DNA/P#P5_Av	18.6	-	0
AVAG00003	398784	398844	DNA#rnd-5_family-3897	13.3	-	0
AVAG00003	404669	404724	PLE/Penelope#Penelope-5_HRo	14.3	-	148
AVAG00003	405397	405412	LINE/L1#L1_Ele5	21.2	+	475
AVAG00003	405413	405475	LINE/R1#MinoAg1	19.1	-	502
AVAG00003	405422	405537	LINE/I-Jockey#Ag-Jock-1	22.4	-	856
AVAG00003	413452	413496	LTR/Gypsy#Gypsy-40_LMi-I	22.2	+	26
AVAG00003	485276	485340	DNA/Maverick#Polinton-4_LMi	21.8	-	167
AVAG00003	496416	496466	DNA/RC#rnd-5_family-6308	21.6	-	0
AVAG00003	497999	498035	PLE/Penelope-Athena#AthL1a	13.5	+	0
AVAG00003	503771	503833	LTR/Gypsy#Gypsy-58_CGi-I	18.7	-	3
AVAG00003	524524	524576	LTR/Gypsy#rnd-6_family-4491	18.9	-	0
AVAG00003	553010	553067	LTR/Gypsy#Gypsy-72_AA-I	24.1	+	35
AVAG00003	564045	564150	DNA/Maverick#Polinton-3_PBa	20.8	-	0
AVAG00003	616921	616982	DNA/RC#Helitron-9_CGi	22.6	+	28
AVAG00003	617055	617146	DNA/TcMar-Tc1#Mariner-59N1_HSal	25.9	-	13
AVAG00003	617094	617154	LINE/L2#CR1-8_Hmel	19.7	+	7
AVAG00003	617102	617173	DNA/Maverick#Polinton-3_LMi	15.3	-	7
AVAG00003	630740	630790	LINE/L1#L1-45_AAe	11.8	-	4
AVAG00003	633791	633854	LINE/L1#L1-49_LSal	6.1	-	130
AVAG00003	639254	639343	DNA#rnd-5_family-3897	22.1	-	0
AVAG00003	650892	650985	DNA/CMC-EnSpm#EnSpm3_Av	28.7	-	151
AVAG00003	657083	657301	DNA/CMC-EnSpm#EnSpm3_Av	24.601	-	0
AVAG00003	704698	704730	DNA/Dada#rnd-6_family-597	9.1	+	237
AVAG00003	704802	704835	DNA/PIF-Harbinger#Harbinger-1_AAe	11.8	-	234
AVAG00003	705700	705759	DNA/Crypton#Crypton_Av	11.7	+	187
AVAG00003	705865	705921	DNA/hAT-Tip100#rnd-6_family-1597	20	-	255
AVAG00003	706066	706076	DNA/RC#rnd-5_family-1739	13	+	144
AVAG00003	706097	706109	DNA/Crypton#Crypton-1_CTe	6.7	+	130
AVAG00003	706139	706168	LINE/RTE-RTE#RTE-19_Hmel	9.8	+	123
AVAG00003	706170	706194	DNA/RC#Helitron-9_CGi	15	+	106
AVAG00003	728912	728968	LINE/I-Jockey#Jockey-14_AAe	19.6	+	0
AVAG00003	738681	738723	DNA/Sola-2#Sola2-3N1_LSal	11.6	-	44
AVAG00003	747059	747100	LINE/L2#L2-13_Hmel	9.5	+	15
AVAG00003	768575	768638	LINE/I-Jockey#TART_DV	18.8	-	47
AVAG00003	771437	771528	DNA/RC#Helitron-like-13_Hmel	26.4	+	25
AVAG00003	771441	771540	DNA/RC#rnd-5_family-1739	28.2	-	27
AVAG00003	791078	791158	DNA/TcMar-Pogo#pogo8_Av	24.1	-	4
AVAG00003	791162	791602	DNA/TcMar-Tc4#rnd-6_family-3210	27.3	-	8
AVAG00003	791603	791647	DNA/TcMar-Pogo#pogo9_Av	29.5	+	6
AVAG00003	797907	797942	PLE/Penelope-Athena#AthW2-1	11.1	-	3
AVAG00003	838445	838476	LTR/Pao#BEL-155_AA-LTR	6.2	+	1
AVAG00003	851677	851745	LINE/I#I-4_AC	22.8	-	0
AVAG00003	852704	852753	DNA/TcMar-Tc4#Mariner-38B_SIn	26	+	2
AVAG00003	852712	852766	DNA/MULE-NOF#MuDR-1_LHu	18.9	-	2
AVAG00003	871458	871564	DNA/Maverick#Polinton-5_NVi	19.7	+	0
AVAG00003	895406	895505	DNA/RC#rnd-5_family-1739	24.2	-	0
AVAG00003	898100	898186	LTR/Gypsy#Gypsy-23_LMi-I	25	+	0
AVAG00003	910753	910840	LTR/Gypsy#Gypsy-1_DAn-I	15.8	+	11
AVAG00003	914398	914449	DNA#DNA8-12_CGi	19.2	-	0
AVAG00003	916688	916776	DNA/RC#rnd-5_family-1739	31.5	-	13
AVAG00003	924619	924678	PLE/Penelope#rnd-5_family-39	21.7	-	132
AVAG00003	928558	928605	LTR/Gypsy#Gypsy10-I_AG	12.5	+	65
AVAG00003	937348	937450	DNA/RC#rnd-5_family-6308	23	-	445
AVAG00003	967256	967327	LINE/I-Jockey#TART_DV	22.2	-	61
AVAG00003	980813	980957	DNA/RC#rnd-5_family-1739	23.9	+	222
AVAG00003	980832	980882	LTR/Gypsy#Gypsy61-I_AG	11.8	-	184
AVAG00003	985231	985341	LINE/Soliton#Soliton8_Av	21.2	+	394
AVAG00003	1032385	1032466	DNA/Maverick#Polinton-3_PBa	18.3	-	1
AVAG00003	1032410	1032485	DNA#DNA3-10_CGi	16	-	1
AVAG00003	1044683	1044925	LTR/Ngaro#rnd-5_family-8138	27.1	-	161
AVAG00004	15889	15950	DNA/Kolobok-Hydra#Kolobok-1_LMi	19.4	-	8
AVAG00004	70541	70621	LINE/L1#L1-42_LSal	21.1	-	14
AVAG00004	92402	92484	DNA/hAT-Tip100#rnd-6_family-1597	19.6	+	45
AVAG00004	103595	103666	LTR/Gypsy#Gypsy-46_DEl-LTR	18.1	-	0
AVAG00004	154294	154364	LTR/Gypsy#ltr-1_family-10	21.4	+	142
AVAG00004	158921	158968	DNA/MULE-MuDR#MULE1_Av	14.6	+	9
AVAG00004	178893	179118	DNA/PIF-Harbinger#Harbinger2_Av	16.3	+	0
AVAG00004	191673	192865	DNA/Kolobok-H#rnd-6_family-1024	24.257	+	646
AVAG00004	191903	191939	DNA/Kolobok-H#rnd-6_family-4463	13.5	-	95
AVAG00004	210908	211052	PLE/Penelope-Athena#AthJ-N	25	+	59
AVAG00004	211174	211379	LINE/I-Jockey#TART_DV	20	+	81
AVAG00004	217406	217489	LTR/Gypsy#Gypsy10-I_AG	22.2	+	118
AVAG00004	217422	217441	DNA/Maverick#Polinton-1_DGr	16	+	87
AVAG00004	217442	217498	LINE/L2#L2-8_NVi	8.8	-	68
AVAG00004	256908	256972	DNA/RC#rnd-5_family-1739	12.5	-	1
AVAG00004	281235	281695	DNA/TcMar-Tc1#Tc21_Av	20.3	-	0
AVAG00004	282724	282801	DNA/TcMar-Mariner#Avmar5a_Av	19.2	-	0
AVAG00004	282976	283133	DNA/TcMar-Mariner#Avmar5a_Av	22.7	+	0
AVAG00004	338069	338118	LTR/ERV1#rnd-5_family-4770	14	+	298
AVAG00004	344512	344560	LTR/Gypsy#Gypsy-26_DPse-I	16.3	-	0
AVAG00004	344519	344598	LINE/CR1#CR1-16_HRo	20	+	0
AVAG00004	344531	344628	LTR/Gypsy#Gypsy6-NVi_LTR	21	-	0
AVAG00004	365827	365881	DNA/hAT-Tip100#hAT-6_HRo	22.2	+	1
AVAG00004	405192	405273	DNA/TcMar-Tc1#Mariner-18_HSal	30.9	-	1
AVAG00004	405198	405286	DNA/TcMar-Tc1#Mariner-N5_HSal	31.4	+	1
AVAG00004	405211	405291	DNA/Sola-2#Sola2-4_LMi	26.9	-	2
AVAG00004	405221	405293	DNA/Kolobok-T2#Kolobok-2_AP	20.4	+	2
AVAG00004	405233	405301	DNA/Kolobok-T2?#Kolobok-N1_AEc	27.5	+	2
AVAG00004	405302	405322	DNA/hAT-Blackjack#hAT-4_PBa	29.5	+	1
AVAG00004	408806	408871	LTR/Gypsy#Gypsy-16_LH-I	13.1	+	0
AVAG00004	436010	436081	PLE/Penelope-Athena#AthW1	14	+	187
AVAG00004	447835	447897	DNA#DNA2-10_CGi	15	+	1
AVAG00004	448462	448537	DNA/RC#rnd-5_family-1739	15.2	+	68
AVAG00004	552984	553116	DNA/RC#rnd-5_family-1739	18.9	+	291
AVAG00004	559297	559511	DNA/TcMar-Tc1#rnd-5_family-3418	20.1	+	0
AVAG00004	560189	560427	LTR/Unknown#ltr-1_family-24	20.5	-	0
AVAG00004	563483	563777	LTR/TelKA#TelKA1a_Av	26.6	-	0
AVAG00004	588948	589022	LTR/Gypsy#Gypsy-35_CGi-I	27	-	34
AVAG00004	590427	590489	PLE/Penelope-Athena#AthL3	22.2	-	32
AVAG00004	606788	606832	DNA/RC#rnd-5_family-6308	6.7	-	0
AVAG00004	675908	675985	DNA/PiggyBac-Looper#Looper4_Av	18.5	-	0
AVAG00004	676991	677043	DNA/TcMar-Mariner#Slatif2cons	20.8	-	21
AVAG00004	686342	686502	DNA#rnd-5_family-3897	27.7	+	18
AVAG00004	686417	686508	DNA/Maverick#Polinton-8_NVi	26.4	-	18
AVAG00004	694048	694081	LTR/Gypsy#Gypsy-33_SI-I	11.8	-	9
AVAG00004	710693	713313	LTR/Gypsy#rnd-5_family-1179	22.014	-	166
AVAG00004	718995	719053	LTR/Gypsy#Gypsy-21_PBa-LTR	16.9	-	11
AVAG00004	719001	719066	PLE/Penelope#Penelope-47_LMi	22.7	+	11
AVAG00004	719015	719060	DNA/Kolobok-T2#REP-4_PBa	15.2	+	7
AVAG00004	719061	719077	DNA/TcMar-Tc1#Mariner-15_SIn	19.1	-	1
AVAG00004	756195	756239	PLE/Penelope-Athena#AthX-V-T	20	-	1
AVAG00004	756206	756254	PLE/Penelope-Athena#AthX-V-T	10.6	-	1
AVAG00004	756753	756807	LINE/I#I-1_PBa	18.9	-	3
AVAG00004	823029	823210	DNA/Kolobok-Hydra#rnd-5_family-995	31.3	-	33
AVAG00004	823078	823315	DNA/Kolobok#Kolobok_Av	29.4	-	33
AVAG00004	849319	849377	DNA/Crypton#Crypton-1_CTe	21.5	-	248
AVAG00004	849341	849402	PLE/Penelope-Athena#AthX-V-T	15.3	-	245
AVAG00004	872442	872480	LTR/Copia#Copia-2_DEl-I	12.8	-	0
AVAG00004	877479	877550	DNA/PIF-Harbinger#Harbinger-5_CGi	18.8	+	0
AVAG00004	896663	896872	DNA/hAT-Ac#rnd-6_family-1926	28.9	-	136
AVAG00004	905307	905349	PLE/Penelope#Penelope-83_LMi	16.3	-	72
AVAG00004	921017	921091	DNA/Maverick#Polinton-2_ACe	23.3	+	141
AVAG00004	952555	953194	DNA/TcMar-Mariner#Avmar7_Av	28.532	+	0
AVAG00004	969963	970015	LTR/Copia#Copia-30_CQ-I	15.4	-	0
AVAG00004	974172	974244	LTR/Copia#Copia-130_AA-I	19.4	+	172
AVAG00004	1003032	1003115	LINE/L2#L2-8_NVi	15.4	-	6
AVAG00004	1005534	1005573	SINE/tRNA-RTE#SINE2-2_LMi	17.5	-	0
AVAG00004	1014471	1014530	LTR/Gypsy#Gypsy-6_BM-I	18.8	-	14
AVAG00004	1019580	1019630	DNA/Maverick#Polinton-4_LMi	13.7	-	895
AVAG00005	121	437	LINE/I-Jockey#rnd-6_family-1973	31.1	+	0
AVAG00005	28909	29037	LTR/Gypsy#ltr-1_family-34	17.1	+	2
AVAG00005	29067	29130	LTR/Gypsy#Gypsy-72_CGi-I	11.9	+	2
AVAG00005	32143	32372	DNA/TcMar-Tc1#rnd-5_family-3418	17.4	-	0
AVAG00005	35119	35173	LTR/Ngaro#rnd-6_family-5248	18.9	+	1
AVAG00005	42687	42959	DNA/RC#rnd-5_family-6308	25.806	-	0
AVAG00005	96661	96851	LTR/Unknown#ltr-1_family-24	19.7	-	0
AVAG00005	98416	98468	LINE/RTE-X#RTEX-1_CGi	13.8	+	0
AVAG00005	100900	101000	LTR/Ngaro#rnd-5_family-8138	15.1	+	2
AVAG00005	140818	140920	DNA/hAT-hobo#rnd-5_family-808	32	+	0
AVAG00005	141315	141696	DNA/hAT#hAT13_Av	32	+	0
AVAG00005	154346	154451	DNA/TcMar-Tc1#DNA-7_LMi	25.4	-	0
AVAG00005	156949	156983	PLE/Penelope-Athena#AthP1	5.7	-	0
AVAG00005	164386	164573	LTR/Ngaro#rnd-5_family-8138	21.4	-	3
AVAG00005	177779	178151	PLE/Penelope-Athena#AthW2-1	22.723	-	0
AVAG00005	178193	178261	PLE/Penelope-Athena#AthW-J	25.8	+	0
AVAG00005	178919	179022	DNA/PiggyBac#piggyBac2_Av	29.8	+	2
AVAG00005	187535	187616	DNA/hAT-hobo#rnd-5_family-982	21.6	+	0
AVAG00005	191092	191252	PLE/Penelope-Athena#AthW-J	27.5	+	0
AVAG00005	211993	212129	PLE/Penelope-Athena#AthJ-W	21.1	-	2
AVAG00005	228142	228869	LINE/I-Jockey#rnd-6_family-1973	22.669	+	0
AVAG00005	238147	238379	PLE/Penelope#Penelope4_Av	21.1	+	0
AVAG00005	238460	238540	PLE/Penelope#Penelope4_Av	13	-	0
AVAG00005	238486	238656	PLE/Penelope#Penelope3_Av	18.2	+	0
AVAG00005	251490	251557	DNA/PiggyBac#rnd-5_family-2222	20.9	-	0
AVAG00005	254341	255343	DNA/hAT-Ac#rnd-5_family-2166	27.2	-	5
AVAG00005	278533	278600	DNA/MULE-MuDR#rnd-1_family-39	22	+	0
AVAG00005	293283	293431	LTR/Unknown#ltr-1_family-24	19.4	-	0
AVAG00005	300730	300777	LTR/Pao#rnd-5_family-4074	14.6	+	5
AVAG00005	304194	304255	DNA/PIF-Harbinger#rnd-5_family-455	20	-	0
AVAG00005	327103	327156	DNA/Maverick#Polinton-2_TC	16.7	-	0
AVAG00005	327132	327169	PLE/Penelope-Athena#AthW2-2	15.8	+	0
AVAG00005	333122	333776	DNA/TcMar-Mariner#Avmar7_Av	24.855	+	0
AVAG00005	337493	337678	LTR/Juno-Vesta#Vesta1b_Av	24.7	+	0
AVAG00005	464786	464831	DNA/Ginger#Ginger1-2_AP	17.4	-	3
AVAG00005	471010	471410	DNA/PIF-Harbinger#rnd-5_family-455	28.2	-	42
AVAG00005	514680	514797	DNA#rnd-5_family-3897	24.3	+	8
AVAG00005	516461	516523	LINE/I#I-7B_AAe	19.6	+	14
AVAG00005	518279	518796	DNA/RC#rnd-1_family-128	30.594	+	0
AVAG00005	529022	529083	PLE/Penelope-Athena#AthQ	17.7	-	935
AVAG00005	539632	539700	LTR/Gypsy#Gypsy-236_AA-I	18.2	-	3
AVAG00005	556902	556980	LTR/Gypsy#rnd-5_family-1179	17.9	+	0
AVAG00005	599480	599684	DNA#rnd-5_family-3897	26.9	+	3
AVAG00005	612845	612902	DNA/CMC-Transib#TRANSIB3	21.1	-	0
AVAG00005	615437	615468	DNA#DNA-5_PPo	6.2	-	9
AVAG00005	624661	624702	LTR/Pao#rnd-5_family-4074	9.5	-	157
AVAG00005	639529	639595	DNA/TcMar-Tc1#Mariner-N22_HSal	20	+	0
AVAG00005	686246	686349	LTR/Pao#rnd-5_family-4074	17.9	+	7
AVAG00005	687030	687079	LTR/Gypsy#Gypsy-13_CFl-I	12.2	-	0
AVAG00005	707735	707777	PLE/Penelope#Penelope-48_LMi	9.5	+	19
AVAG00005	714932	714996	DNA/IS3EU#IS3EU-N1_CGi	21.9	+	1
AVAG00005	715276	715487	DNA/hAT-Ac#rnd-5_family-2166	25.4	-	2
AVAG00005	725784	725839	DNA/Ginger#Ginger1-2_AP	16.1	+	0
AVAG00005	730312	730408	DNA/MULE-MuDR#MuDR6_Av	25	+	0
AVAG00005	760287	760335	DNA/Kolobok-T2#Kolobok-2_AP	18.4	-	49
AVAG00005	768526	768587	LTR/Gypsy#Gypsy5-I_Dya	23.4	-	114
AVAG00005	782461	782514	LINE/CR1#CR1-62_AAe	15.4	+	86
AVAG00005	806767	806836	DNA/Maverick#Polinton-8_NVi	22.9	-	0
AVAG00005	806798	806899	DNA/PIF-ISL2EU#ISL2EU-18_CGi	20.3	+	0
AVAG00005	833336	833394	DNA/CMC-Chapaev-3#Chapaev3-1_HR	20.3	-	59
AVAG00005	856963	857020	LTR/Copia#Copia-7_DAn-I	14.4	-	87
AVAG00005	857636	857682	DNA/Maverick#Polinton-1_LMi	10.9	-	0
AVAG00005	857874	857924	LINE/L2#Daphne-49_LMi	21.6	-	0
AVAG00005	906870	906936	DNA/P#P-1_LHu	19.4	-	0
AVAG00005	908277	908511	DNA/hAT-Ac#rnd-5_family-2166	26.7	-	76
AVAG00005	918667	918713	DNA/hAT#DNA8-13_CQ	19.1	-	27
AVAG00005	920001	936336	LTR/Gypsy#rnd-6_family-4491	1.5	-	8465
AVAG00005	937755	937792	DNA/PIF-Harbinger#rnd-5_family-455	10.8	-	13
AVAG00005	953638	953675	DNA/Kolobok-T2?#Kolobok-N1_AEc	13.2	-	58
AVAG00005	961205	961278	PLE/Penelope-Athena#AthW1-J-R	16.4	+	208
AVAG00005	1000642	1000706	DNA/IS3EU#IS3EU-N1_CGi	21.5	+	0
AVAG00005	1008387	1008420	LTR/Gypsy#Gypsy-20_SI-I	14.7	-	81
AVAG00005	1009329	1010877	LTR/ERV1#rnd-5_family-4770	24.447	+	6
AVAG00006	692	774	LTR/Pao#rnd-5_family-4074	21.2	-	3
AVAG00006	8773	8812	LINE/Dong-R4#R4-3_SRa	7.5	-	16
AVAG00006	29509	29553	DNA/Maverick#Polinton-8_NVi	9.8	-	0
AVAG00006	58560	58727	LTR/Unknown#ltr-1_family-24	16.1	-	0
AVAG00006	63743	63779	DNA/hAT-Blackjack#hAT-4_PBa	5.4	+	11
AVAG00006	100772	100813	LINE/L2#L2-6_Hmel	11.9	+	441
AVAG00006	119608	119699	LTR/Pao#rnd-5_family-4074	26.7	-	2
AVAG00006	124852	124978	LTR/Pao#rnd-5_family-4074	26.9	-	28
AVAG00006	124919	125134	DNA/hAT-Ac#rnd-5_family-2166	22.7	-	39
AVAG00006	142471	142515	DNA/PIF-Spy#ISL2EU-4_CFl	17.8	-	10
AVAG00006	149616	149677	PLE/Penelope-Athena#AthW2-1	17.7	+	34
AVAG00006	149641	149714	LTR/Gypsy#rnd-5_family-8925	10.7	+	42
AVAG00006	170652	170713	LTR/ERV1#rnd-5_family-4770	11.3	+	153
AVAG00006	179893	179904	DNA#DNA4-6_CGi	16.7	+	0
AVAG00006	179905	179965	PLE/Penelope-Athena#AthV-L1	16.4	-	0
AVAG00006	203694	203725	LTR/Gypsy#Gypsy10-I_Dpse	3.1	+	18
AVAG00006	218139	225428	DNA/PIF-Harbinger#rnd-5_family-455	29.358	+	128
AVAG00006	219594	222383	DNA/PIF-Harbinger#rnd-5_family-455	28.053	+	47
AVAG00006	229001	248303	LTR/Gypsy#rnd-5_family-1179	19.623	-	480
AVAG00006	249173	249244	DNA/hAT-Tip100#hAT-15_HRo	26.4	-	0
AVAG00006	249193	249254	DNA/Kolobok-T2#REP-4_PBa	26	+	0
AVAG00006	249254	249291	LTR/Gypsy#Gypsy68-I_AG	26.6	-	0
AVAG00006	265275	265371	LTR/Gypsy#Gypsy-3_TCa-I	28.2	-	0
AVAG00006	310945	311747	LTR/Gypsy#rnd-5_family-1179	27.7	+	21
AVAG00006	343727	343781	LTR/Gypsy#Gypsy-172_AA-I	18.5	-	4
AVAG00006	357913	359564	DNA/Crypton#Crypton_Av	14.527	-	234
AVAG00006	361498	361560	LTR/ERV1#rnd-5_family-4770	17	-	0
AVAG00006	380418	380508	LINE/R1#MinoAg1	30.7	+	0
AVAG00006	380832	380873	DNA#DNA-26_CGi	9.8	-	0
AVAG00006	401217	401271	DNA/hAT-Tip100#hAT-13_LMi	18.9	-	2
AVAG00006	406630	406672	DNA/hAT-Charlie#hAT-N2_LSal	11.6	+	28
AVAG00006	428342	428399	PLE/Penelope-Athena#AthJ-W	22.4	-	2
AVAG00006	470707	470779	LTR/Gypsy#Gypsy-18_LG-I	16.2	-	76
AVAG00006	507107	507173	DNA/RC#rnd-5_family-6308	13.6	-	75
AVAG00006	507138	507225	DNA/TcMar-Tc1#Mariner-52N1_HSal	26.5	-	67
AVAG00006	529702	532085	DNA/hAT#hAT31_Av	0	-	87
AVAG00006	562189	562281	DNA/Kolobok-H#rnd-6_family-4463	25.3	+	2979
AVAG00006	565241	565304	DNA/Sola-2#Sola2-8_LMi	25	-	54
AVAG00006	587420	587506	SINE/tRNA-Core#BivaCORE-SINE1_RuDe	29.1	+	0
AVAG00006	591725	591767	LTR/Gypsy#Gypsy-19_LH-I	16.3	+	78
AVAG00006	645865	645917	DNA/hAT-Ac#Homo10	15.1	-	5
AVAG00006	687692	687772	DNA/MULE-MuDR#MuDR8_Av	20	-	0
AVAG00006	698069	698124	DNA/hAT-Charlie#hAT-1_DAn	20	-	37
AVAG00006	698400	698451	LINE/L2#L2-8_NVi	12	+	2
AVAG00006	732965	733039	LTR/Gypsy#Gypsy-87_CQ-I	21.9	+	20
AVAG00006	763048	763148	LINE/L2#L2B-6_AAe	30	+	55
AVAG00006	777385	777461	DNA/RC#rnd-5_family-6308	22.1	+	0
AVAG00006	781702	781753	LTR/Pao#BEL-6_DMoj-I	21.1	+	0
AVAG00006	785943	786107	LINE/I-Jockey#TART_DV	22.8	-	359
AVAG00006	787312	787354	LTR/Pao#BEL-60_AA-I	12.6	+	219
AVAG00006	796132	796245	LTR/ERV1#rnd-5_family-4770	21.4	+	346
AVAG00006	827872	827937	LINE/R1#TRAS1	22.7	+	1
AVAG00006	827887	827947	DNA/Ginger#Ginger1-1_AC	16.7	-	1
AVAG00006	855620	855656	DNA/TcMar-Tc1#Mariner-79B_HSal	16.2	+	62
AVAG00006	856235	856287	DNA/Maverick#Polinton-1_DK	18.9	+	164
AVAG00006	856553	856589	PLE/Penelope-Athena#AthW2-1	5.4	-	164
AVAG00006	857214	857235	LTR/Gypsy#Gypsy68-I_AG	25.6	+	164
AVAG00006	857236	857297	LINE/L2#Daphne-38_HRo	25.8	+	164
AVAG00006	857246	857297	DNA/Kolobok-T2#Kolobok-2_AP	21.1	-	163
AVAG00006	860523	860596	DNA/RC#Helitron-N1_PBa	17.6	-	12
AVAG00006	869274	869312	SINE/tRNA-Core#OK	5.1	-	0
AVAG00006	869275	869319	DNA/RC#rnd-5_family-1739	13.6	+	0
AVAG00006	872971	873012	DNA/hAT#hAT31_Av	19.1	-	62
AVAG00006	901439	901504	LTR/Pao#BEL-262_AA-I	20.7	+	184
AVAG00006	902037	912284	DNA/TcMar-Mariner#rnd-5_family-605	15.577	-	7319
AVAG00006	904676	906350	DNA/TcMar-Mariner#rnd-5_family-605	27.5	-	3155
AVAG00006	913367	913415	LTR/Copia#Copia-12_DPu-LTR	12.8	-	69
AVAG00006	920177	920209	LINE/R1#TRAS-5_TUr	12.1	+	943
AVAG00006	938133	938217	DNA/RC#Helitron-3N1_NVi	22	-	112
AVAG00006	938145	938203	LINE/L2#L2-8_NVi	13.6	+	104
AVAG00006	949372	949416	DNA/Maverick#Polinton-1_DGr	6.7	+	0
AVAG00006	949377	949424	LINE/L2#L2-8_NVi	10.4	-	0
AVAG00006	964382	964462	DNA/Kolobok-H#rnd-6_family-1024	17.3	-	1102
AVAG00006	966876	966986	LTR/Gypsy#Gypsy-1_TCa-I	26.6	+	331
AVAG00006	966958	967004	LINE/L2#L2B-4_AAe	14.9	+	364
AVAG00006	976149	976195	DNA/CMC-Transib#Transib-1_DBi	14.9	+	408
AVAG00006	996721	996785	LINE/I-Jockey#TART_DV	14.3	-	148
AVAG00006	1003901	1004016	DNA/TcMar-Pogo#pogo5_Av	25.2	+	92
AVAG00006	1004227	1004325	DNA/TcMar-Pogo#pogo5_Av	33.3	-	94
AVAG00007	25469	25940	LTR/TelKA#TelKA3a_Av	5.9	+	8
AVAG00007	56445	56577	DNA/Dada#rnd-6_family-597	26.9	+	0
AVAG00007	88986	89912	DNA/hAT-Ac#rnd-5_family-2166	25.5	-	2
AVAG00007	106761	107967	DNA/Dada#rnd-6_family-597	28.508	-	5
AVAG00007	121983	123307	DNA/Dada#rnd-6_family-597	26.611	-	2
AVAG00007	125506	126548	DNA/hAT-Ac#rnd-5_family-2166	28.4	-	129
AVAG00007	126640	126850	DNA/TcMar-Tc1#rnd-5_family-77	28.9	+	28
AVAG00007	177385	178688	DNA/hAT-Ac#rnd-5_family-2166	20.8	-	9
AVAG00007	230046	230117	DNA/hAT#hAT1_Av	13.9	-	0
AVAG00007	364432	364497	LTR/Gypsy#Gypsy-41_DAn-LTR	16.7	+	0
AVAG00007	380950	381004	DNA/IS5#IS5_Av	20	+	0
AVAG00007	383481	383618	LINE/I-Jockey#TART_DV	33	+	4
AVAG00007	383545	383617	PLE/Penelope#Penelope-9_HRo	23.6	+	4
AVAG00007	396227	397177	LTR/Ngaro#rnd-6_family-5579	26.095	-	6
AVAG00007	405603	405690	DNA/MULE-MuDR#MuDR8_Av	19.5	-	0
AVAG00007	405619	405629	DNA/MULE-MuDR#MuDR8_Av	19.6	-	0
AVAG00007	406571	406631	DNA/MULE-MuDR#MuDR8_Av	14.8	+	0
AVAG00007	416800	416870	DNA/MULE-MuDR#MULE2_Av	26.8	-	0
AVAG00007	460334	460420	LTR/Gypsy#rnd-6_family-4491	26.8	+	0
AVAG00007	481307	481366	LTR/Pao#BEL19-I_AG	16.9	+	1
AVAG00007	553930	553971	LINE/L2#Crack-2_AAe	7.5	-	0
AVAG00007	611428	611663	LTR/Unknown#ltr-1_family-24	6.4	+	26
AVAG00007	615024	615062	DNA/TcMar-Tc1#Mariner-N8_SIn	10.3	-	0
AVAG00007	630665	630725	PLE/Penelope-Athena#AthW2-1	21.7	-	0
AVAG00007	643408	643497	PLE/Penelope-Athena#AthJ-W	17.6	-	0
AVAG00007	677670	677810	DNA/Maverick#Polinton-8_NVi	26.8	+	1
AVAG00007	714868	714957	DNA/CMC-EnSpm#CACTA2_Av	20	+	5
AVAG00007	714871	715433	DNA/TcMar-Tc1#Tc21_Av	32.396	+	5
AVAG00007	715071	715195	DNA/TcMar-Tc1#Tc21_Av	33.9	-	5
AVAG00007	723180	723238	DNA#DNA-11_CGi	22	+	73
AVAG00007	724860	724897	DNA/hAT-Charlie#hAT-N25_LSal	15.8	-	11
AVAG00007	730003	730182	LINE/Soliton#Soliton6b_Av	31.3	-	0
AVAG00007	735281	735301	DNA/RC#rnd-5_family-1739	23.4	-	694
AVAG00007	737375	737460	DNA#DNA3-10_CGi	16.3	-	262
AVAG00007	737445	737524	PLE/Penelope-Athena#AthW2-1	19.2	-	176
AVAG00007	743646	743689	DNA/Kolobok-T2?#Kolobok-N1_AEc	9.1	-	223
AVAG00007	761414	761477	LTR/Gypsy#Gypsy61-I_AG	23	+	77
AVAG00007	783449	783505	LINE/L2#Kiri-6_AAe	16.1	-	42
AVAG00007	787395	787433	DNA/PIF-Harbinger#rnd-5_family-455	12.8	-	2
AVAG00007	800203	800243	LTR/Gypsy#Gypsy-16_PBa-LTR	7.3	+	4
AVAG00007	800244	800261	DNA/Kolobok-T2#Kolobok-2_AP	10.8	+	4
AVAG00007	800523	800559	LINE/L1#L1-47_LSal	10.8	+	8
AVAG00007	817598	817652	DNA/RC#rnd-5_family-1739	16.7	+	119
AVAG00007	850521	850557	PLE/Penelope-Athena#AthX-V-T	7.7	-	89
AVAG00007	854420	854490	DNA/Maverick#Polinton-3_TC	18.3	+	125
AVAG00007	854451	854515	DNA/hAT-Blackjack#hAT-4_PBa	21.5	-	124
AVAG00007	856705	856753	LINE/L2#Kiri-13_HMM	16.3	+	94
AVAG00007	930179	930231	DNA/RC#rnd-5_family-1739	15.1	-	1
AVAG00007	946282	946347	DNA/PIF-Harbinger#rnd-6_family-3339	15.5	+	17
AVAG00007	956056	956126	DNA/hAT-Tip100#hAT-N27_RPr	21.4	-	0
AVAG00007	957507	958939	LTR/Unknown#ltr-1_family-4	29.803	-	3
AVAG00008	44579	44648	LTR/ERV1#rnd-5_family-4770	14.5	-	245
AVAG00008	44611	44685	DNA/PIF-Harbinger#rnd-5_family-455	12.6	-	290
AVAG00008	44648	44682	LTR/Gypsy#Gypsy61-I_AG	25.6	+	208
AVAG00008	63431	63508	DNA/TcMar-Tc1#Tc20_Av	22.7	-	0
AVAG00008	63538	63570	DNA/MULE-MuDR#MULE2_Av	3	-	0
AVAG00008	68939	68990	DNA/TcMar-Tc1#Mariner-10_DK	18	-	104
AVAG00008	71199	71262	LINE/L2#Daphne-6_HRo	23.4	+	57
AVAG00008	71217	71262	DNA/Maverick#Polinton-1_ACe	17.4	+	35
AVAG00008	96306	96356	DNA/TcMar-Tc4#Mariner-38B_SIn	25.5	+	640
AVAG00008	97838	97898	DNA/RC#Helitron-9_CGi	16.7	-	0
AVAG00008	97840	97908	DNA/Crypton#Crypton-1_CTe	26.5	-	0
AVAG00008	129396	129465	DNA/Zator#Zator1_Av	20	-	774
AVAG00008	130292	130375	DNA/Kolobok-Hydra#Kolobok-3_Aplcal	20.7	-	53
AVAG00008	145864	145917	LTR/Gypsy#Gypsy-62_CQ-LTR	18.6	-	0
AVAG00008	171185	171232	LINE/L2#CR1-1_AG	8.7	+	377
AVAG00008	171207	171263	DNA/PIF-Harbinger#rnd-5_family-455	19.6	-	380
AVAG00008	196117	196154	DNA#DNA-1_CQ	15.8	-	0
AVAG00008	206759	206826	DNA/hAT-Blackjack#hAT-16N2_LMi	20.6	-	1
AVAG00008	214673	214739	LINE/L2#Daphne-39_HRo	18.8	+	14
AVAG00008	219901	219983	DNA/MULE-MuDR#CeRep1A	13.6	+	194
AVAG00008	225543	277970	DNA/RC#rnd-5_family-6308	18.88	-	26236
AVAG00008	226246	226279	LTR/Gypsy#Gypsy-83_CGi-I	8.8	+	35
AVAG00008	229136	229202	LINE/I-Jockey#HELENA	22.3	-	61
AVAG00008	244951	245099	DNA/Maverick#Polinton-8_NVi	26.1	-	147
AVAG00008	283724	283785	DNA/RC#Helitron-8_CGi	20	+	0
AVAG00008	298556	298636	PLE/Penelope-Athena#AthK-V	16.8	+	78
AVAG00008	322237	322715	DNA/TcMar-Tc1#Tc4_Av	26.907	+	0
AVAG00008	352982	353064	DNA#DNA3-10_CGi	21.9	-	0
AVAG00008	353029	353090	PLE/Penelope-Athena#AthW1-J-R	21.3	+	0
AVAG00008	353091	353108	DNA#DNA2-10_CGi	23.7	+	0
AVAG00008	359005	359071	LINE/L2#L2-3_HRo	19.9	+	505
AVAG00008	380666	380775	DNA/hAT-Charlie#hAT-17_LSal	20.4	-	68
AVAG00008	445576	445717	LINE/I-Jockey#TART_DV	13.3	+	99
AVAG00008	448614	448686	PLE/Penelope-Athena#AthW1-J-R	23.6	+	1
AVAG00008	467679	467758	DNA/P#P-4_LSal	16.9	+	32
AVAG00008	501910	501951	LTR/Gypsy#Gypsy-13_DEl-I	10	+	12
AVAG00008	513795	513828	LINE/RTE-RTE#RTE-4_BM	8.8	+	0
AVAG00008	538734	538795	LINE/L2#Kiri-17_AAe	11.7	+	112
AVAG00008	539402	539458	LINE/L2#Crack-8_AAe	24.6	+	66
AVAG00008	559395	559461	DNA/Crypton#Crypton-1_CTe	21.1	-	57
AVAG00008	570253	570373	DNA/hAT#hAT25_Av	24.1	+	215
AVAG00008	596853	596908	LTR/Pao#BEL-42_AA-I	12.1	+	1297
AVAG00008	613220	613271	PLE/Penelope-Athena#AthJ-W	17.3	-	133
AVAG00008	625411	625465	DNA/TcMar-Tc1#TSESSEBEII	20	+	5
AVAG00008	627514	627578	DNA/PIF-ISL2EU#ISL2EU-18_CGi	18.8	-	18
AVAG00008	629981	630029	DNA/Maverick#Polinton-1_DK	16.7	+	72
AVAG00008	657170	657225	PLE/Penelope#rnd-6_family-5747	23.2	-	14
AVAG00008	703869	703936	LTR/Pao#BEL-10_LH-I	17.9	-	291
AVAG00008	709651	709707	DNA/hAT-Tip100#hAT-15_HRo	19.3	-	61
AVAG00008	710557	710662	DNA/Sola-1#Sola1-1_AC	22.5	-	62
AVAG00008	727425	727491	LTR/Gypsy#Gypsy-28_LSal-I	22.7	+	0
AVAG00008	731373	731567	LINE/I-Jockey#TART_DV	28.976	-	95
AVAG00008	775533	775590	LINE/L2#L2-23_CTe	15.5	+	10
AVAG00008	807765	807866	DNA#DNA-5_LVa	21.1	+	34
AVAG00008	809358	809404	DNA/Maverick#Polinton-2_PBa	17.4	+	0
AVAG00008	832076	832169	DNA/RC#Helitron-1_DAna	21.1	+	0
AVAG00008	832520	832564	DNA/RC#Heli3_Av	11.1	-	0
AVAG00008	838432	838557	LTR/Gypsy#Gypsy-1_BT-I	22.4	-	7
AVAG00008	845224	845310	LTR/Gypsy#Gypsy-4_DVir-I	23.8	+	120
AVAG00008	888959	889074	DNA/MULE-MuDR#MULE3_Av	18.2	+	0
AVAG00008	901234	901270	DNA/MULE-MuDR#MULE5_Av	10.8	-	0
AVAG00008	905575	905634	LINE/L2#Kiri-17_HMM	15.5	+	3
AVAG00008	918488	918557	DNA/RC#Helitron-9_CGi	27.1	-	9
AVAG00008	940973	941033	LINE/L2#Kiri-13_HMM	13.6	+	0
AVAG00008	956714	956812	DNA/PIF-Harbinger#DNA3-11_CGi	16.5	+	0
AVAG00009	1243	5035	LINE/I-Jockey#Hebe_Av	0.156	+	7
AVAG00009	8549	8603	PLE/Penelope#Penelope-6_HRo	12.7	-	122
AVAG00009	10029	10080	DNA#DNA8-16_LMi	17.3	+	101
AVAG00009	35880	35925	DNA#CELE46A	19.6	-	262
AVAG00009	39971	40021	LINE/I-Jockey#Vingi-49_LMi	18.4	+	0
AVAG00009	70265	70405	LTR/Gypsy#Gypsy-35_CGi-I	23	+	388
AVAG00009	77261	77398	LINE/L2#Daphne-15_CTe	23.6	-	3
AVAG00009	107173	107365	DNA/hAT-Ac#rnd-5_family-2166	28.8	-	0
AVAG00009	110712	110747	LINE/L2#L2B-4_AAe	11.1	+	359
AVAG00009	117851	117885	DNA/Dada#rnd-6_family-597	5.7	+	703
AVAG00009	117855	117899	LTR/Gypsy#Gypsy14-LTR_Dpse	24.4	+	722
AVAG00009	124052	124623	DNA/hAT#hAT4_Av	26.951	+	0
AVAG00009	124603	124639	DNA/hAT#hAT4_Av	16.2	-	0
AVAG00009	158436	158492	PLE/Penelope-Athena#AthW1-J-R	21.9	-	306
AVAG00009	164576	164619	PLE/Penelope-Athena#AthW2-2	18.2	-	721
AVAG00009	193839	193913	DNA/Maverick#Polinton-8_NVi	29.3	+	0
AVAG00009	195136	195187	LTR/Pao#BEL-1_LMi-I	17.6	-	188
AVAG00009	197799	197880	LINE/I-Jockey#TART_DV	22.3	+	175
AVAG00009	201548	201609	PLE/Penelope-Athena#AthW1	17.7	-	68
AVAG00009	202122	202195	DNA/RC#rnd-5_family-1739	21.9	-	39
AVAG00009	202196	202244	LTR/Gypsy#Gypsy-19_SI-I	31.5	-	34
AVAG00009	224957	225013	SINE/tRNA-Meta#HalSINE1	22.8	-	1
AVAG00009	224963	225024	DNA/Kolobok-T2?#Kolobok-N1_AEc	23.4	-	1
AVAG00009	226921	226987	DNA/P#P5_Av	18.8	-	1
AVAG00009	230408	232667	DNA/TcMar-Pogo#pogo1_Av	0	+	2
AVAG00009	260849	260906	PLE/Penelope-Athena#AthW2-1	10.5	-	123
AVAG00009	264541	268747	LINE/L1-Tx1#Tx1_Av	7.624	-	18
AVAG00009	265043	267672	LINE/L1-Tx1#Tx1_Av	0.3	-	14
AVAG00009	269982	270045	DNA/PIF-Harbinger#Harbinger1_Av	15.6	-	1
AVAG00009	270375	275450	LINE/L1-Tx1#Tx1_Av	0	-	57
AVAG00009	294805	294837	LINE/L2#Kiri-8_AAe	12.1	+	21
AVAG00009	296628	296701	DNA/RC#Helitron-9_CGi	17.8	+	25
AVAG00009	323308	323426	PLE/Penelope-Athena#AthW	17.6	+	0
AVAG00009	323918	324028	LTR/ERV1#rnd-5_family-4770	24.5	-	14
AVAG00009	324221	324291	DNA#rnd-5_family-3897	20.3	+	32
AVAG00009	335414	335463	LTR/ERV1#rnd-5_family-4770	16	-	72
AVAG00009	367045	367109	DNA/hAT-Tip100#hAT-3_LMi	24.6	+	63
AVAG00009	437402	437484	LTR/Gypsy#Gypsy-613_AA-I	24.7	+	3
AVAG00009	454710	454769	DNA/Maverick#Polinton-3_TC	15.5	-	0
AVAG00009	465689	465772	DNA/MULE-MuDR#rnd-1_family-39	21.6	-	0
AVAG00009	470705	470756	DNA/Ginger#Ginger2c_Av	19.2	-	0
AVAG00009	471249	471298	DNA#DNA8-1D_RPr	8.3	+	0
AVAG00009	520032	520156	DNA/TcMar-Pogo#pogo9_Av	32	+	0
AVAG00009	525921	526434	DNA/CMC-EnSpm#CACTA8_Av	14.901	-	0
AVAG00009	526401	526475	DNA/CMC-EnSpm#CACTA8_Av	10.7	+	2
AVAG00009	543887	544002	DNA#DNA-11_CGi	17.6	+	4
AVAG00009	554075	554139	LINE/L2#L2-41_HRo	18.5	-	0
AVAG00009	612450	612572	DNA/RC#Helitron1_AG	20.1	-	399
AVAG00009	615744	615846	DNA/Maverick#Polinton-2_PBa	26.2	+	427
AVAG00009	615766	615868	LTR/Gypsy#Gypsy8-I_Dpse	36.3	+	345
AVAG00009	615797	615881	LINE/I-Jockey#Ag-Jock-1	30.6	+	281
AVAG00009	621289	621361	DNA/Maverick#Polinton-2_ACe	23.7	-	561
AVAG00009	651073	651498	DNA/Sola#Sola2_Av	34.2	+	0
AVAG00009	651577	651606	DNA/TcMar-Mariner#Avmar9_Av	0	-	0
AVAG00009	652620	652962	LINE/RTE-X#rnd-1_family-282	29.1	+	13
AVAG00009	659250	659592	LINE/RTE-X#rnd-1_family-282	29.3	-	106
AVAG00009	662002	662162	DNA/Ginger#Ginger2c_Av	28.4	+	0
AVAG00009	662741	662869	DNA/Ginger#Ginger2c_Av	24.3	-	0
AVAG00009	670836	670976	LINE/RTE-X#rnd-1_family-282	20.7	-	5
AVAG00009	674951	675265	LINE/RTE-X#rnd-1_family-282	25.8	-	895
AVAG00009	685274	685380	PLE/Penelope-Athena#AthP1	19	+	0
AVAG00009	685585	685640	PLE/Penelope-Athena#AthP1	19.6	-	1
AVAG00009	687301	687374	LTR/Gypsy#Gypsy-10_DVir-LTR	21.1	-	0
AVAG00009	687330	687595	LTR/TelKA#TelKA4_Av	27.5	-	0
AVAG00009	712332	712411	DNA/hAT-Tip100#hAT-6_HRo	27.3	+	0
AVAG00009	732661	733575	DNA/Dada#rnd-6_family-597	29.094	-	28
AVAG00009	736241	736279	DNA/Kolobok-T2#Kolobok-2_CGi	12.8	-	187
AVAG00009	743417	743460	DNA/Maverick#Polinton-2_ACe	13.6	+	395
AVAG00009	767672	767732	DNA/PIF-ISL2EU#ISL2EU-18_CGi	18.6	+	88
AVAG00009	768008	768050	PLE/Penelope-Athena#AthX-V-T	9.3	-	3
AVAG00009	823455	823507	LTR/Gypsy#Gypsy-6_DWil-I	15.1	+	570
AVAG00009	837621	837684	PLE/Penelope-Athena#AthW2-2	14.8	+	0
AVAG00009	876370	876429	DNA/CMC-Chapaev#mTA_Ele42	20.3	+	2
AVAG00009	884794	884885	DNA/hAT#hAT9_Av	27.5	-	1
AVAG00009	888453	888504	DNA/Crypton#Crypton-1_CTe	13.7	-	338
AVAG00009	891400	891460	DNA/Maverick#Polinton-3_PBa	16.6	+	91
AVAG00009	920316	923510	LINE/RTE#RTE1_Av	0.9	+	11
AVAG00009	939910	939959	LINE/L2#Daphne-38_HRo	24	-	7
AVAG00009	940314	940403	DNA/hAT#hAT20_Av	25	-	7
AVAG00010	13893	13935	PLE/Penelope-Athena#AthJ-W	11.6	-	78
AVAG00010	28188	28270	DNA/RC#rnd-5_family-1739	18.5	-	2
AVAG00010	57047	57126	DNA#DNA3-14_CGi	16.8	+	0
AVAG00010	78857	79092	DNA/MULE-MuDR#MuDR6_Av	28	-	4
AVAG00010	92343	92572	DNA/hAT-Ac#rnd-5_family-2166	29.9	+	134
AVAG00010	92510	92619	LTR/Pao#rnd-5_family-4074	26.7	+	88
AVAG00010	93089	93150	DNA/TcMar-Tc1#Mariner-N29_HSal	13.8	+	116
AVAG00010	101025	101850	DNA/RC#Heli1_Av	25.686	+	0
AVAG00010	104150	104219	LINE/L2#Kiri-19_AAe	15.9	+	1
AVAG00010	174365	174427	DNA/TcMar-Mariner#Avmar7_Av	13.3	+	434
AVAG00010	220453	220484	DNA/Kolobok-H#rnd-6_family-1024	12.5	+	116
AVAG00010	220632	220706	DNA/TcMar-Tc1#Mariner-91_HSal	30.7	-	98
AVAG00010	223992	224064	LINE/I-Jockey#TART_DV	18.9	+	126
AVAG00010	224242	224361	LTR/Gypsy#Gypsy-37_CQ-I	21.9	-	78
AVAG00010	241011	241887	DNA/RC#Heli4_Av	1.5	-	0
AVAG00010	248941	248990	DNA/RC#Helitron-9_CGi	18	-	0
AVAG00010	248950	249002	DNA/Crypton#Crypton-1_CTe	12.3	-	0
AVAG00010	251154	251188	LINE/Dong-R4#R4-2_BX	11.4	-	0
AVAG00010	255521	255596	LTR/Pao#BEL-1_CGi-I	20.6	+	2
AVAG00010	269133	269187	LTR/Gypsy#rnd-6_family-4491	19.3	-	41
AVAG00010	301183	301255	DNA/Maverick#Polinton-1_TC	20.4	+	4
AVAG00010	301521	301587	DNA/Maverick#Polinton-1_DGr	21.2	-	5
AVAG00010	301537	301590	DNA/hAT-Tip100#hAT-15_HRo	13	-	5
AVAG00010	301543	301623	DNA/hAT-Blackjack#hAT-4_PBa	15.6	+	5
AVAG00010	333922	333985	LTR/Gypsy#Gypsy-55_DEl-I	20.1	-	1
AVAG00010	337282	337315	PLE/Penelope-Athena#AthW2-2	14.7	-	4
AVAG00010	343388	343448	LTR/Gypsy#rnd-5_family-1179	17.6	-	0
AVAG00010	360497	360603	DNA/Maverick#Polinton-9_NVi	24.7	+	0
AVAG00010	365366	365433	PLE/Penelope-Athena#AthL3	13.6	+	242
AVAG00010	378982	379031	LTR/Gypsy#Gypsy-8_AA-I	16.7	-	12
AVAG00010	388221	388266	LTR/Gypsy#Gypsy-3_DTa-LTR	19.6	+	0
AVAG00010	390512	390588	LTR/ERV1#rnd-5_family-4770	17.9	-	20
AVAG00010	409753	409830	DNA/Dada#rnd-6_family-597	14.2	-	30
AVAG00010	410491	410536	PLE/Penelope-Athena#AthW1-J-R	11.1	-	52
AVAG00010	454840	454931	LINE/I-Jockey#Ag-Jock-1	25.3	+	1078
AVAG00010	459667	459737	LTR/Ngaro#rnd-6_family-5579	15.1	+	4
AVAG00010	460026	460101	LTR/Gypsy#Gypsy68-I_AG	21.6	+	3
AVAG00010	460045	460102	DNA/hAT-Tip100#hAT-15_HRo	19	+	3
AVAG00010	460046	460111	DNA/RC#Helitron-N1_PBa	15.2	+	3
AVAG00010	462564	462617	LINE/I-Jockey#HeT-A3_DVi	15.7	-	0
AVAG00010	487772	487820	DNA/Maverick#Polinton-9_NVi	18.4	-	19
AVAG00010	493427	493524	DNA/RC#Helitron-like-13_Hmel	25.8	+	0
AVAG00010	515598	515676	DNA/Kolobok#Kolobok3_Av	24.7	+	0
AVAG00010	516015	516218	DNA/hAT-Ac#rnd-6_family-8293	28.1	+	0
AVAG00010	531284	531341	DNA/PIF-Harbinger#rnd-5_family-455	18.6	+	0
AVAG00010	531287	531353	DNA/TcMar-Pogo#pogo12_Av	17.8	+	0
AVAG00010	531337	532467	DNA/PiggyBac#rnd-5_family-8810	16.611	-	0
AVAG00010	531575	531667	LTR/Gypsy#Gypsy-68_LMi-I	21.9	+	0
AVAG00010	553082	553144	LTR/Gypsy#Gypsy-2_HMM-I	24.6	-	9
AVAG00010	579129	579171	LTR/Pao#rnd-5_family-4074	16.3	-	0
AVAG00010	586115	586265	LINE/CR1#CR1-2_CQ	22.5	+	2
AVAG00010	588235	596268	LTR/Juno-Vesta#Vesta1a_Av	16.329	+	31
AVAG00010	597583	597676	DNA/Kolobok#Kolobok3_Av	22.6	-	0
AVAG00010	598695	598782	DNA/RC#rnd-5_family-274	21.2	+	0
AVAG00010	599799	599844	DNA/MULE-MuDR#MULE2_Av	19.6	-	0
AVAG00010	600140	600956	DNA/MULE-MuDR#MULE3_Av	27.2	-	2
AVAG00010	607179	608182	DNA/hAT-Ac#rnd-5_family-2166	28.8	-	54
AVAG00010	608219	608547	DNA/TcMar-Tc1#rnd-5_family-77	27.5	+	29
AVAG00010	610911	610982	DNA/hAT-Ac#rnd-5_family-2166	25.4	+	0
AVAG00010	611104	611295	DNA/TcMar-Tc1#rnd-5_family-3525	33.3	+	0
AVAG00010	617483	618058	DNA/TcMar-Tc1#Tc22_Av	2.4	+	0
AVAG00010	624004	624048	LINE/L1#L1-25_LSal	11.4	-	0
AVAG00010	633329	636030	LTR/Pao#rnd-5_family-4074	23.998	-	28
AVAG00010	673450	673540	DNA/hAT-Ac#rnd-5_family-2166	23.3	-	2
AVAG00010	677415	677460	LINE/L2#Daphne-18_HRo	15.2	+	18
AVAG00010	692698	692812	LTR/Gypsy#Gypsy-4_Deu-I	21.4	-	4
AVAG00010	713161	713220	DNA/CMC-EnSpm#CACTA4_Av	15	-	3
AVAG00010	718092	718280	DNA/hAT-Ac#rnd-5_family-2166	23.9	+	0
AVAG00010	725756	725795	DNA/hAT#hAT20_Av	15	+	0
AVAG00010	731568	731795	DNA/hAT-Ac#rnd-5_family-2166	27.8	-	0
AVAG00010	731788	731907	DNA/TcMar-Mariner#Avmar4_Av	28.5	-	0
AVAG00010	731916	732027	LINE/I-Jockey#Hebe_Av	6.2	-	0
AVAG00010	757264	757325	DNA/CMC-Transib#Transib-4_DAn	20.4	+	1
AVAG00010	824997	827314	DNA/hAT-Ac#rnd-5_family-2166	24.795	+	6
AVAG00010	843839	843906	DNA/hAT#hAT20_Av	15.2	+	0
AVAG00010	874498	874533	DNA/PIF-Harbinger#rnd-5_family-455	8.3	-	0
AVAG00010	893697	894184	DNA/TcMar-Mariner#rnd-6_family-704	24.66	-	0
AVAG00010	908708	908751	DNA/MULE-MuDR#MuDR-1_LMi	11.6	-	0
AVAG00010	917981	918131	DNA/hAT#DNA8-2_CB	19.6	-	0
AVAG00010	921144	921255	DNA/TcMar-Mariner#rnd-1_family-112	13.5	-	0
AVAG00010	924641	924728	DNA/hAT#hAT9_Av	12.7	+	0
AVAG00010	925727	925804	LTR/Gypsy#rnd-6_family-4491	17.3	+	10
AVAG00010	932102	932146	DNA#DNA-10_CTe	13.6	-	0
AVAG00010	934382	934426	DNA#DNA-10_CTe	13.6	-	0
AVAG00011	5892	5935	PLE/Penelope#Penelope-9_HRo	9.1	+	3
AVAG00011	9169	9271	DNA#DNA8-10_CGi	23.1	+	0
AVAG00011	10079	10129	PLE/Penelope-Athena#AthX-V-T	17.6	-	0
AVAG00011	10088	10176	PLE/Penelope#Penelope-5_HRo	21.6	-	0
AVAG00011	30320	30371	LTR/Pao#BEL-604_AA-I	14	-	7
AVAG00011	44983	45020	DNA/TcMar-Tc1#TSESSEBEII	10.5	-	0
AVAG00011	45021	45046	DNA/RC#rnd-5_family-6308	18.2	+	0
AVAG00011	74515	74632	LINE/I-Jockey#Jockey-6_DK	24.6	+	255
AVAG00011	81922	82003	DNA/RC#rnd-5_family-1739	18.4	-	199
AVAG00011	118417	118510	LTR/Gypsy#rnd-5_family-1179	29.8	+	5
AVAG00011	122894	123066	LINE/I-Jockey#TART_DV	18.9	+	26
AVAG00011	122940	123087	LTR/Pao#ROO_I	26	+	23
AVAG00011	122975	123061	LINE/CR1#CR1_Ele9	24.4	+	16
AVAG00011	124204	124241	LTR/Gypsy#Gypsy61-I_AG	10.5	+	21
AVAG00011	124476	124527	DNA/hAT-Tip100#hAT-15_HRo	15.4	+	7
AVAG00011	124487	124525	LINE/L2#Daphne-58_LMi	7.7	+	7
AVAG00011	124526	124545	SINE/tRNA-Core#OK	18.4	+	6
AVAG00011	132314	132385	LTR/Copia#Copia2-NVi_I	23.6	-	195
AVAG00011	139163	139231	DNA/hAT-Blackjack#hAT-16N2_LMi	26.1	-	0
AVAG00011	164343	164511	LINE/I-Jockey#TART_DV	31.3	+	162
AVAG00011	166607	166730	LTR/Unknown#ltr-1_family-12	25	+	7
AVAG00011	174005	174057	DNA/Sola-1#Sola1-1_AC	24.5	+	1
AVAG00011	182217	182251	LTR/Gypsy#Gypsy-1_AC-I	8.6	-	102
AVAG00011	182424	182515	DNA/hAT-Blackjack#hAT-4_PBa	18.9	+	60
AVAG00011	194768	194863	LTR/Gypsy#ltr-1_family-16	22.9	+	2
AVAG00011	196167	196241	DNA/RC#Helitron-9_CGi	21.5	+	2380
AVAG00011	209791	209859	DNA/RC#rnd-5_family-1739	22.8	+	5
AVAG00011	218194	218287	LTR/Gypsy#Gypsy-35_CGi-I	27.5	-	6
AVAG00011	227014	227103	DNA/Sola-1#Sola1-1_AC	23.6	-	26
AVAG00011	240218	240279	DNA/hAT#hAT15_Av	21	+	48
AVAG00011	250751	250800	DNA/Maverick#Polinton-1_DY	2.2	+	0
AVAG00011	266362	266474	DNA/TcMar-Tc1#Mariner-29_AEc	20.5	+	0
AVAG00011	266837	266915	LTR/Gypsy#Gypsy68-I_AG	22.8	-	1
AVAG00011	272216	273412	DNA/Kolobok-H#rnd-6_family-1024	17.948	+	631
AVAG00011	282446	282916	DNA/hAT#hAT9_Av	8.385	+	0
AVAG00011	313117	313242	DNA/RC#rnd-5_family-1739	22.7	-	41
AVAG00011	315554	315585	DNA/hAT-Tip100#hAT-19_LMi	9.4	-	11
AVAG00011	317198	317257	DNA/TcMar-Tc4#Mariner3-4N1_LMi	15	-	4
AVAG00011	322580	322662	LINE/R1-LOA#Loa-4_LSal	18.6	+	258
AVAG00011	323963	324020	DNA/RC#rnd-5_family-1739	17.2	+	382
AVAG00011	326043	326240	DNA/PiggyBac-Looper#Looper4_Av	31.4	-	0
AVAG00011	327339	327487	LINE/CR1#CR1-2_CQ	21.9	+	63
AVAG00011	327346	327518	LINE/I-Jockey#TART_DV	21.7	+	72
AVAG00011	343679	344151	DNA/hAT-Ac#rnd-5_family-2166	8.2	-	25
AVAG00011	363278	363450	DNA/RC#rnd-5_family-6308	28.1	-	0
AVAG00011	375390	377017	LTR/Gypsy#rnd-6_family-4491	23.462	-	8804
AVAG00011	379589	379729	PLE/Penelope-Athena#AthJ-N-W1	32.4	+	0
AVAG00011	393223	393305	LTR/Gypsy#Gypsy-82_CQ-I	21.2	-	204
AVAG00011	439141	439221	DNA/RC#rnd-5_family-6308	21.2	-	0
AVAG00011	445932	446009	LTR/Ngaro#rnd-6_family-5579	19.5	-	0
AVAG00011	454445	454522	LINE/L2#Daphne-14_HRo	16.5	-	4
AVAG00011	455573	455618	LINE/I#I-4_RPr	13.3	-	104
AVAG00011	467208	467259	DNA/hAT-Ac#rnd-6_family-1926	21.1	-	137
AVAG00011	473536	473598	DNA/hAT-Tip100#rnd-6_family-1597	15.3	-	5
AVAG00011	497067	497121	LTR/Gypsy#Gypsy-35_CGi-I	18.2	+	16
AVAG00011	516143	516246	PLE/Penelope-Athena#AthX-V-T	18.9	-	10
AVAG00011	535513	535614	LTR/Gypsy#Gypsy-23_LSal-I	28.4	+	0
AVAG00011	539396	539463	LTR/Pao#BEL-267_AA-LTR	25.4	-	0
AVAG00011	582894	582941	LTR/Gypsy#Gypsy33-I_AG	13.4	-	2
AVAG00011	606304	606341	DNA/Maverick#Polinton-1_TC	5.6	+	9
AVAG00011	623038	625396	LINE/RTE#RTE2_Av	29.2	+	8
AVAG00011	654991	655066	DNA/Maverick#Polinton-2_DEu	15.6	+	0
AVAG00011	677223	677234	LINE/L2#Daphne-29_HRo	16.3	+	0
AVAG00011	677235	677286	DNA/P#P-2_PBa	17.3	-	0
AVAG00011	681763	681827	LINE/CR1#CR1_Ele30	14.8	-	10
AVAG00011	689975	689990	PLE/Penelope-Athena#AthW2-2	18	+	68
AVAG00011	710063	710191	LINE/I-Jockey#TART_DV	21.1	+	383
AVAG00011	722583	722761	DNA/TcMar-Tc1#Tc8_Av	29.2	+	0
AVAG00011	726010	726113	LTR/Gypsy#Gypsy-91_CQ-I	27.3	+	190
AVAG00011	749341	749414	DNA/TcMar-Tc4#Mariner3-2_HSal	19.2	-	65
AVAG00011	752061	752109	LTR/Gypsy#Gypsy-8_LG-I	12.8	-	68
AVAG00011	756527	756595	DNA/hAT-Ac#rnd-6_family-1926	27.5	+	159
AVAG00011	763310	763346	LINE/L1#L1-46_AAe	10.8	-	38
AVAG00011	767724	767771	LTR/Gypsy#Gypsy-12_DPu-I	17	+	153
AVAG00011	770716	770802	DNA/Kolobok-H#rnd-6_family-1024	20.7	+	181
AVAG00011	773124	773162	LTR/Copia#Copia-37_CQ-I	15.4	-	24
AVAG00011	852046	852227	LTR/Unknown#ltr-1_family-39	0	-	9
AVAG00011	853614	853656	LTR/Gypsy#Gypsy-2_BM-I	11.9	+	92
AVAG00012	6851	7283	DNA/hAT-Ac#rnd-6_family-1926	28.6	-	10
AVAG00012	9620	9665	DNA/Dada#Dada-U6_CT	19.6	-	36
AVAG00012	32572	32621	LTR/Unknown#ltr-1_family-4	18	+	4
AVAG00012	37570	37644	DNA/PiggyBac-PB#AvPB2	20.6	+	0
AVAG00012	83484	83704	DNA/TcMar-Tc1#rnd-5_family-77	25.3	-	1
AVAG00012	85707	86708	DNA/hAT-Ac#rnd-5_family-2166	28.7	+	34
AVAG00012	99164	99233	DNA/MULE-MuDR#rnd-1_family-39	27.1	+	3
AVAG00012	136920	136980	LTR/Gypsy#Gypsy-76_LMi-I	19.7	+	13
AVAG00012	148734	148820	LINE/I-Jockey#TART_DV	21.7	+	215
AVAG00012	161512	161582	LINE/L2#Daphne-7_HRo	19.6	-	2
AVAG00012	161583	161621	DNA/Maverick#Polinton-1_ACe	10.3	-	2
AVAG00012	161829	161891	LINE/L2#Daphne-17_HRo	18.8	-	11
AVAG00012	161892	161930	DNA/Maverick#Polinton-1_ACe	10.3	-	11
AVAG00012	174717	174773	LINE/I-Jockey#Jockey-2_DVi	17.5	-	5
AVAG00012	197590	197637	LINE/L2#Kiri-11_AAe	17	-	0
AVAG00012	225258	225417	DNA#DNA-11_CGi	28.8	-	0
AVAG00012	225323	225473	DNA/Maverick#Polinton-3_PBa	28.3	-	0
AVAG00012	250737	251135	DNA#rnd-5_family-3897	30.786	+	5
AVAG00012	256315	256575	DNA/hAT-Ac#rnd-5_family-2166	26.8	+	0
AVAG00012	260769	260810	LTR/Gypsy#Gypsy-18_LG-I	7.5	-	2
AVAG00012	289431	289491	DNA/RC#rnd-5_family-6308	27.9	-	0
AVAG00012	298116	298164	DNA/P#P4_AG	14.3	-	51
AVAG00012	324742	324802	DNA#DNA-11_CGi	21.7	-	4
AVAG00012	334196	334284	DNA/Crypton#Crypton_Av	23.6	-	6
AVAG00012	334226	334271	DNA/RC#rnd-5_family-1739	15.2	-	6
AVAG00012	359293	359388	DNA#DNA2-10_CGi	28.3	+	1
AVAG00012	361123	361181	DNA/hAT-Tip100#hAT-6_HRo	22.4	-	2
AVAG00012	361141	361187	DNA/Kolobok-T2?#Kolobok-N1_AEc	12.8	-	2
AVAG00012	365511	365589	DNA/IS3EU#IS3EU-N1_CGi	24.1	-	27
AVAG00012	375454	375551	DNA/TcMar-Tc1#Mariner-13_SIn	28	-	103
AVAG00012	375466	375570	DNA/Sola-1#Sola1-1_AC	30.5	-	104
AVAG00012	375497	375571	LINE/L2#Daphne-3_CTe	16.4	-	101
AVAG00012	375507	375590	LINE/R1#TRAS3_BM	17.8	+	101
AVAG00012	379836	379881	LTR/ERV1#rnd-5_family-4770	30.4	-	287
AVAG00012	379882	379937	LINE/L1#L1-45_AAe	23.2	+	360
AVAG00012	379898	379960	LINE/I-Jockey#Jockey-6_DK	16.1	-	370
AVAG00012	390531	390563	DNA/TcMar-Tc1#Mariner-13_SIn	12.1	-	20
AVAG00012	408099	408212	DNA/RC#rnd-5_family-1739	27.8	+	183
AVAG00012	408151	410312	LTR/Gypsy#Gypsy61-I_AG	22.768	-	912
AVAG00012	408458	408574	LTR/ERV1#rnd-5_family-4770	23.3	+	167
AVAG00012	417508	417556	DNA/hAT-Tip100#rnd-6_family-1597	16.3	-	8
AVAG00012	530278	530637	LTR/TelKA#TelKA3a_Av	24.9	-	0
AVAG00012	550401	550450	DNA/Sola-2#Sola2-6_LMi	14.3	-	1
AVAG00012	563164	563211	LTR/Gypsy#Gypsy-12_DVir-I	18.8	+	16
AVAG00012	575342	575401	DNA/Maverick#Polinton-2_PBa	16.7	+	28
AVAG00012	575949	575985	LTR/Gypsy#Gypsy-176_AA-I	16.2	+	8
AVAG00012	583830	583882	DNA/P#P-27_LSal	13.5	-	7
AVAG00012	587188	587284	LTR/Gypsy#Gypsy-129_AA-I	23.2	+	68
AVAG00012	587360	587455	LINE/R1#RTAg4	30.2	+	68
AVAG00012	607773	607817	DNA/RC#Helitron-N1_HSal	6.8	+	22
AVAG00012	625423	625508	DNA/PIF-ISL2EU#ISL2EU-15_CGi	23.2	-	0
AVAG00012	632725	632774	LTR/Gypsy#Gypsy13-NVi_I	11.6	+	0
AVAG00012	637512	637577	LTR/ERV1#rnd-5_family-4770	15.2	+	175
AVAG00012	637521	637589	DNA/RC#rnd-5_family-1739	23.9	+	180
AVAG00012	673306	673325	DNA/Maverick#Polinton-8_NVi	25.8	+	0
AVAG00012	673357	673420	DNA#DNA2-6_CGi	17.2	-	0
AVAG00012	684018	729794	LTR/ERV1#rnd-5_family-4770	14.715	+	21290
AVAG00012	692280	692410	DNA/RC#Heli3a_Av	21.8	-	1
AVAG00012	717367	717440	DNA/Kolobok-H#rnd-6_family-1024	23.9	+	7
AVAG00012	717390	717443	DNA/Crypton#Crypton-1_CTe	15.4	+	7
AVAG00012	717410	717449	LINE/L2#L2B-4B_AAe	15	-	7
AVAG00012	723782	723862	DNA/RC#rnd-5_family-1739	25.9	-	160
AVAG00012	723792	723924	PLE/Penelope#Penelope-5_HRo	31.3	-	210
AVAG00012	723839	723862	LINE/I-Jockey#Jockey-3_DGri	35.2	-	123
AVAG00012	723863	723930	LINE/R1#R1_DYa	29.4	+	171
AVAG00012	730979	731059	DNA/Ginger#Ginger2-1_TS	22.8	-	245
AVAG00012	739710	739810	LTR/Gypsy#Gypsy61-I_AG	22.7	+	136
AVAG00012	813345	814903	PLE/Penelope#Penelope6_Av	29.915	+	24
AVAG00012	832516	832721	LTR/Gypsy#rnd-5_family-1179	27.1	+	26
AVAG00012	835782	835895	DNA/hAT-Ac#rnd-5_family-2166	22	-	0
AVAG00012	841291	841390	PLE/Penelope-Athena#AthJ-W	20.4	+	20
AVAG00012	844507	844565	DNA/MULE-MuDR#MuDR-1_LMi	16.9	-	0
AVAG00012	844517	844580	DNA/Sola-2#Sola2-8_LMi	22.2	+	0
AVAG00013	435	509	LTR/Gypsy#Gypsy-617_AA-I	14.5	-	1
AVAG00013	19947	20179	DNA#rnd-5_family-3897	27.4	+	14
AVAG00013	20640	21013	LINE/R1#RTAg4	29.6	+	13
AVAG00013	20881	21014	LINE/I-Jockey#Ag-Jock-1	24.6	+	4
AVAG00013	20949	21023	LINE/L1#L1_Ele5	27.4	-	3
AVAG00013	20966	21063	PLE/Penelope-Athena#AthL3	28	+	3
AVAG00013	39573	39666	PLE/Penelope#Penelope-6_HRo	18.2	-	51
AVAG00013	52223	52289	LTR/Gypsy#Gypsy-64_LMi-I	23.5	-	124
AVAG00013	74995	75065	LTR/Gypsy#Gypsy-14_DAn-I	28.2	-	118
AVAG00013	75083	75135	LTR/Gypsy#Gypsy-203_AA-LTR	15.1	+	115
AVAG00013	79342	79413	DNA#DNA6-9_CGi	17.2	-	27
AVAG00013	86128	86225	DNA#DNA-11_CGi	19.9	-	1
AVAG00013	93022	93063	DNA/MULE-NOF#Rehavkus-1_HR	16.7	-	0
AVAG00013	109405	109436	DNA/Kolobok-H#rnd-6_family-4463	9.4	-	112
AVAG00013	156499	156549	LINE/I-Jockey#Jockey-3_DGri	19.6	+	467
AVAG00013	205027	205078	LINE/RTE-BovB#RTE_BovB_Av	23.1	+	0
AVAG00013	209797	209900	LINE/I-Jockey#TART_DV	28.4	-	0
AVAG00013	209846	209906	PLE/Penelope-Athena#AthX-V-S	15	-	0
AVAG00013	235271	235321	LTR/Gypsy#Gypsy14-LTR_Dpse	19.6	+	1
AVAG00013	241365	241415	DNA/RC#rnd-5_family-6308	13.7	+	55
AVAG00013	250080	250156	LTR/ERV1#rnd-5_family-4770	19.5	+	15
AVAG00013	314625	314684	DNA#rnd-5_family-3897	25	+	2
AVAG00013	339543	339602	LTR/Gypsy#rnd-6_family-4491	19.3	-	462
AVAG00013	340852	340952	DNA/Kolobok-Hydra#Kolobok-3_Aplcal	23.7	+	23
AVAG00013	340902	340982	DNA#DNA-11_CGi	23.7	+	0
AVAG00013	353828	353935	LTR/Pao#rnd-5_family-4074	20.1	-	439
AVAG00013	376289	376347	DNA/Ginger#Ginger2c_Av	16.4	-	0
AVAG00013	385409	385471	LTR/Copia#Copia-65_AA-I	18.1	+	0
AVAG00013	385422	385471	LTR/Gypsy#Gypsy6-NVi_LTR	14	+	0
AVAG00013	385472	385484	LTR/Gypsy#Gypsy-10_DVir-LTR	20.9	-	0
AVAG00013	417084	417177	LINE/L1-Tx1#L1-N6_CQ	22.3	-	74
AVAG00013	476204	476284	DNA/Maverick#Polinton-8_NVi	19	-	33
AVAG00013	477934	477999	DNA/Kolobok-Hydra#Kolobok-6_CGi	15.6	+	133
AVAG00013	488357	488412	DNA/RC#rnd-5_family-1739	16.4	+	156
AVAG00013	509607	509641	DNA/TcMar-Tc1#rnd-5_family-3418	0	+	8
AVAG00013	525462	525504	PLE/Penelope#rnd-1_family-154	7	-	58
AVAG00013	546090	546150	DNA/Kolobok-T2?#Kolobok-N1_AEc	18	-	10
AVAG00013	547196	547236	LTR/Gypsy#Gypsy61-I_AG	12.2	+	1330
AVAG00013	547204	547259	LTR/Pao#BEL-185_AA-I	15.1	-	1586
AVAG00013	548042	548052	LINE/L2#L2-8_NVi	23.3	-	1
AVAG00013	548443	548513	DNA#DNA-2_LMi	24.3	-	6
AVAG00013	569794	569830	DNA/Maverick#Polinton-2_RPr	16.2	-	1596
AVAG00013	615913	615952	DNA/RC#Helitron-1_DVir	12.8	-	26
AVAG00013	618662	618746	DNA/hAT-Tip100#hAT-6_HRo	24.1	+	1
AVAG00013	659808	659853	PLE/Penelope-Athena#AthW2-1	19.6	+	0
AVAG00013	660428	660485	LINE/Soliton#Soliton6b_Av	16.1	-	4
AVAG00013	663466	663500	DNA/Academ-1#Academ-1_Aplcal	11.4	-	426
AVAG00013	695085	695201	LINE/I#I_Ele4C_AAe	17.2	+	4
AVAG00013	702652	702738	DNA/RC#Helitron-9_CGi	23.5	+	77
AVAG00013	734848	734965	DNA#DNA4-6_CGi	26.4	+	0
AVAG00013	735404	735667	DNA#rnd-5_family-3897	27.229	+	34
AVAG00013	738331	738388	PLE/Penelope#Penelope-6_HRo	15.5	-	246
AVAG00013	762199	762244	LTR/Pao#BEL-131_AA-I	13.3	-	30
AVAG00013	777278	777724	DNA/PiggyBac#rnd-5_family-2222	26.3	-	1
AVAG00013	778085	779752	DNA/PiggyBac#rnd-5_family-2222	21.3	+	12
AVAG00013	780143	784501	DNA/P#P6_Av	31.051	+	15
AVAG00013	780336	782844	DNA/PiggyBac#piggyBac8_Av	2.7	-	14
AVAG00013	788797	788920	DNA/P#P6_Av	27.3	+	0
AVAG00013	797034	797144	DNA/PiggyBac-Looper#Looper3_Av	27.3	+	12
AVAG00013	807951	808214	LINE/L2#rnd-5_family-1308	17.4	-	0
AVAG00013	808451	808539	DNA/CMC-EnSpm#EnSpm1_Av	27.6	-	0
AVAG00013	808573	808948	DNA/PiggyBac#rnd-5_family-335	24.4	+	0
AVAG00013	811230	812335	DNA/PiggyBac-Pokey#Pokey4_Av	27.732	-	0
AVAG00013	812477	812668	DNA/TcMar-Mariner#rnd-6_family-704	28.1	+	0
AVAG00013	816858	817080	LINE/Soliton#Soliton1_Av	32.1	+	0
AVAG00013	826817	827694	PLE/Penelope-Athena#AthM	10.8	-	109
AVAG00014	16954	17029	LTR/Pao#BEL-2_AA-LTR	26.4	-	7
AVAG00014	19899	20270	LTR/Juno-Vesta#Vesta1a_Av	6.2	+	0
AVAG00014	26625	26668	DNA/Merlin#Merlin3_Av	4.8	-	25
AVAG00014	72833	72922	PLE/Penelope#Penelope-5_HRo	20.4	-	14
AVAG00014	87840	87893	LINE/R1#RTAg4	14.8	+	111
AVAG00014	87847	87904	LTR/Gypsy#Gypsy8-I_Dpse	20.7	+	114
AVAG00014	113509	113561	DNA/Kolobok-T2#REP-4_PBa	19.6	-	8
AVAG00014	120248	120351	LINE/R1#RTAg4	29.7	+	237
AVAG00014	132166	132190	DNA/TcMar-Tigger#Tigger2_Av	30.3	+	0
AVAG00014	132968	133028	LINE/Soliton#Soliton7_Av	8.2	-	0
AVAG00014	135396	136316	DNA/Sola#Sola2c_Av	33.397	-	60
AVAG00014	167227	167271	DNA/Sola-1#Sola1-8_AP	17.8	-	378
AVAG00014	203575	203663	LTR/Gypsy#Gypsy-55_CGi-I	22.4	-	310
AVAG00014	209039	209092	LTR/Gypsy#Gypsy68-I_AG	18.5	+	0
AVAG00014	216547	216591	LTR/Gypsy#rnd-5_family-1179	11.1	+	0
AVAG00014	248187	248274	PLE/Penelope#Penelope-6_HRo	18.4	+	20
AVAG00014	270315	270375	LTR/Gypsy#Gypsy-237_AA-I	23.8	-	113
AVAG00014	275800	275900	DNA/TcMar-Tc1#Mariner-29_AEc	26.8	-	1
AVAG00014	275818	275879	DNA/Kolobok-T2?#Kolobok-N1_AEc	17.7	+	1
AVAG00014	277152	277212	LTR/Ngaro#rnd-5_family-8138	14.1	+	44
AVAG00014	277174	277263	LTR/Gypsy#Gypsy37-I_AG	26.8	-	57
AVAG00014	279183	279216	DNA/RC#Helitron-9_CGi	5.9	-	52
AVAG00014	287456	287537	DNA/RC#Helitron-3N1_NVi	21.3	+	1
AVAG00014	287891	288052	LTR/Gypsy#Gypsy-43_DWil-I	29.2	-	10
AVAG00014	290325	290372	PLE/Penelope-Athena#AthX-V-T	17	-	2
AVAG00014	291351	291420	LINE/L2#L2-8_NVi	13.1	-	1
AVAG00014	291377	291428	DNA/Kolobok-T2#Kolobok-2_AP	15.4	+	1
AVAG00014	309740	309823	LINE/RTE-X#RTEX-14_CGi	14.1	+	1
AVAG00014	384355	384488	LTR/Gypsy#Gypsy61-I_AG	31.1	+	220
AVAG00014	408761	408839	LINE/I-Jockey#TART_DV	21.4	+	112
AVAG00014	408840	408861	LINE/R1#RTAg4	32	+	70
AVAG00014	415727	415914	PLE/Penelope-Athena#AthJ-N-W1	23.2	+	0
AVAG00014	422630	422681	LINE/L2#Daphne-17_HRo	6.5	+	0
AVAG00014	423206	423304	DNA/RC#HelitronY1A_CE	23.9	-	0
AVAG00014	453130	478165	DNA/hAT-Tip100#rnd-6_family-1597	0.9	-	7159
AVAG00014	497022	497377	LTR/Unknown#ltr-1_family-4	27.449	-	0
AVAG00014	536816	536858	LTR/Gypsy#Gypsy-14_RP-I	14.3	-	128
AVAG00014	599269	599317	DNA/Maverick#Polinton-1_DY	22.4	+	0
AVAG00014	599330	599424	DNA/RC#rnd-5_family-1739	20.7	-	0
AVAG00014	656599	656645	DNA#DNA3-14_CGi	10.6	-	1
AVAG00014	670338	670394	LTR/Gypsy#Gypsy-29_DWil-I	7.3	+	512
AVAG00014	670346	670431	LINE/I-Jockey#TART_DV	24.4	+	582
AVAG00014	708397	708546	LTR/Gypsy#Gypsy-35_CGi-I	24.7	+	381
AVAG00014	714606	714654	LTR/Gypsy#Gypsy-3_LH-I	22.4	-	4
AVAG00014	725269	725314	DNA/P#Galileo_DM	15.2	+	0
AVAG00014	730119	730171	DNA#DNA6-9_CGi	5.9	+	2
AVAG00014	751473	751519	LINE/R1#TRAS3_BM	13.4	-	0
AVAG00014	751484	751532	DNA/hAT-Pegasus#Homo6	20.4	+	0
AVAG00014	753921	753994	DNA/hAT-Blackjack#hAT-4_PBa	21.9	+	221
AVAG00014	753932	753994	DNA/Sola-1#Sola1-1_AC	19.1	+	206
AVAG00014	760078	760112	LINE/L2#L2B-4B_AAe	14.3	-	92
AVAG00014	767238	767343	DNA/PiggyBac#piggyBac2_Av	30.2	+	0
AVAG00014	769564	769617	DNA/MULE-NOF#Rehavkus-3_TC	17.3	-	3
AVAG00014	779194	779569	PLE/Penelope-Athena#AthK1	10.2	-	0
AVAG00014	781570	781928	PLE/Penelope-Athena#AthK1	7.6	-	0
AVAG00014	781925	798725	PLE/Penelope-Athena#AthW1	0.038	-	268
AVAG00014	798726	798916	PLE/Penelope-Athena#AthW1	2.1	-	2
AVAG00014	799084	799184	PLE/Penelope-Athena#AthK-V	30	+	0
AVAG00014	799449	818307	PLE/Penelope-Athena#AthW2-1	0.1	-	417
AVAG00014	819148	820906	DNA/RC#rnd-5_family-274	4.044	-	74
AVAG00014	821311	821343	DNA/Academ-1#Academ-13_LMi	9.1	-	6
AVAG00014	822093	823011	DNA/Kolobok#Kolobok3_Av	29.56	+	80
AVAG00015	1279	1374	DNA/MULE-MuDR#rnd-1_family-39	16.5	-	0
AVAG00015	1444	2774	LINE/RTE#RTE4_Av	25.1	-	0
AVAG00015	3117	3248	LINE/RTE-RTE#RTE-4_Hmel	24.6	-	0
AVAG00015	3799	3878	PLE/Penelope-Athena#AthW2-2	15.4	-	0
AVAG00015	3936	4092	DNA/MULE-MuDR#MULE5_Av	17.7	+	0
AVAG00015	4899	5282	DNA/MULE-MuDR#MuDR15_Av	32.9	-	0
AVAG00015	6064	6280	DNA/MULE-MuDR#MULE5_Av	20.9	-	0
AVAG00015	8804	8893	DNA/MULE-MuDR#rnd-1_family-39	17.5	+	0
AVAG00015	9677	9713	PLE/Penelope-Athena#AthW	8.1	-	0
AVAG00015	15821	15935	DNA/hAT-Ac#rnd-5_family-2166	13.1	+	0
AVAG00015	16263	16413	PLE/Penelope-Athena#AthP1	21.6	+	0
AVAG00015	18360	18769	PLE/Penelope-Athena#AthL3	14.8	-	0
AVAG00015	18782	26033	PLE/Penelope-Athena#AthJ-N	24.764	-	0
AVAG00015	26047	26109	DNA/MULE-MuDR#MuDR3_Av	15.2	+	0
AVAG00015	26110	26799	DNA/MULE-MuDR#rnd-1_family-39	4.3	-	2
AVAG00015	36596	36660	DNA/Maverick#Polinton-8_NVi	21.5	-	0
AVAG00015	42894	42938	DNA/hAT#hAT18_Av	8.9	+	0
AVAG00015	45405	45479	LINE/I-Jockey#Jockey-8_HMM	27.4	+	85
AVAG00015	66376	66419	LINE/L2#L2-8_NVi	20.4	-	143
AVAG00015	93159	93233	DNA/Kolobok-T2?#Kolobok-N1_AEc	20.1	-	50
AVAG00015	96251	96304	DNA#DNA-11_CGi	16.7	+	37
AVAG00015	100813	100874	LTR/Pao#BEL-30_CQ-LTR	26.7	+	0
AVAG00015	102129	102182	DNA/Ginger#Ginger1-1_AC	27.8	+	0
AVAG00015	102446	102529	DNA#DNA8-10_CGi	21.7	+	0
AVAG00015	116333	116348	LTR/Gypsy#Gypsy-13_CFl-I	12.2	-	0
AVAG00015	116349	116448	DNA#DNA3-10_CGi	20.6	-	21
AVAG00015	120645	120692	DNA/PIF-Harbinger#DNA3-13B_CGi	16.7	+	17
AVAG00015	133884	133954	SINE/tRNA-Core#OK	24.3	+	6
AVAG00015	145826	145862	DNA/RC#rnd-5_family-1739	8.1	-	80
AVAG00015	151017	151085	LTR/Gypsy#Gypsy-21_PBa-LTR	15.7	+	56
AVAG00015	186931	186975	DNA/Dada#rnd-6_family-597	15.6	+	80
AVAG00015	194772	194819	DNA/CMC-Chapaev-3#Chapaev3-1_HR	12.5	-	129
AVAG00015	195861	197397	DNA/Crypton#Crypton_Av	27.046	-	356
AVAG00015	200899	200965	DNA/TcMar-Tc1#Mariner-39_LSal	21.5	-	138
AVAG00015	212779	212850	LTR/Gypsy#Gypsy-35_CGi-I	22.5	+	269
AVAG00015	216531	216580	LINE/L2#Daphne-35_HRo	10.7	+	2
AVAG00015	218025	218062	DNA/hAT-Ac#hATN-1_HRo	7.9	-	0
AVAG00015	246714	246758	LTR/ERV1#rnd-5_family-4770	13.3	+	119
AVAG00015	246725	246770	LTR/Gypsy#Gypsy-35_CQ-I	11.1	+	119
AVAG00015	268896	268998	DNA/hAT-Ac#Mariner-25_RPr	23.6	+	134
AVAG00015	303010	303079	PLE/Penelope#Penelope-6_HRo	18.8	-	4
AVAG00015	309832	309933	DNA/RC#rnd-5_family-1739	27	+	6
AVAG00015	315381	315464	LINE/R1#RTAg4	20.5	+	89
AVAG00015	315398	315453	LTR/Gypsy#Gypsy-1_AC-I	17.9	+	85
AVAG00015	315454	315479	LINE/I-Jockey#Jockey-3_DGri	24.4	+	75
AVAG00015	318177	318253	DNA/TcMar-Mariner#rnd-5_family-605	14.6	-	31
AVAG00015	327159	327209	LTR/Gypsy#Gypsy14-LTR_Dpse	12	+	0
AVAG00015	327903	327986	DNA/CMC-EnSpm#CACTA3_Av	20.6	+	792
AVAG00015	328699	328753	LINE/I#I-7B_AAe	17.8	+	464
AVAG00015	331018	331094	DNA/Maverick#Polinton-8_NVi	20	-	1
AVAG00015	334837	334897	PLE/Penelope-Athena#AthJ-W	11.5	+	12
AVAG00015	353642	353698	DNA/RC#Helitron-N1_PBa	12.3	-	305
AVAG00015	369056	369096	DNA/RC#rnd-5_family-1739	7.3	-	1
AVAG00015	407647	407704	DNA/PIF-Harbinger#rnd-6_family-3339	13.8	+	0
AVAG00015	417834	418109	LINE/I#I-1_DP	25.3	-	142
AVAG00015	446608	446653	LINE/L2#Daphne-19_HRo	13.3	-	143
AVAG00015	487465	487510	LINE/L2#Daphne-19_HRo	13.3	+	117
AVAG00015	516772	516962	LINE/I#I-1_DP	24.4	+	92
AVAG00015	527104	527161	DNA/PIF-Harbinger#rnd-6_family-3339	10.5	-	0
AVAG00015	578185	578231	DNA/Maverick#Polinton-1_PBa	14.9	-	0
AVAG00015	578191	578250	DNA/PIF-Harbinger#rnd-5_family-455	18.6	+	0
AVAG00015	591780	591852	DNA/IS3EU#IS3EU-N1_CGi	24.3	-	0
AVAG00015	595562	595639	LTR/Gypsy#Gypsy-286_AA-I	17.4	+	65
AVAG00015	601414	601474	PLE/Penelope-Athena#AthJ-W	12.5	-	5
AVAG00015	608320	608403	DNA/CMC-EnSpm#CACTA3_Av	20.6	-	227
AVAG00015	609092	609139	LTR/Gypsy#Gypsy14-LTR_Dpse	10.6	-	0
AVAG00015	618056	618174	DNA/TcMar-Mariner#rnd-5_family-605	21.6	+	41
AVAG00015	620834	620859	LINE/I-Jockey#Jockey-3_DGri	23.9	-	101
AVAG00015	620860	620918	LTR/Gypsy#Gypsy-1_AC-I	18.6	-	110
AVAG00015	626338	626437	DNA/RC#rnd-5_family-1739	24.5	-	4
AVAG00015	633184	633253	PLE/Penelope#Penelope-6_HRo	18.8	+	3
AVAG00015	639990	640082	DNA/RC#Helitron-N1_PBa	21.8	+	120
AVAG00015	669855	669957	DNA/hAT-Ac#Mariner-25_RPr	23.1	-	161
AVAG00015	692014	692078	LTR/Gypsy#Gypsy-35_CQ-I	25	-	112
AVAG00015	692045	692086	LTR/ERV1#rnd-5_family-4770	11.9	-	95
AVAG00015	694233	694283	DNA/PIF-Spy#ISL2EU-6_CGi	21.6	+	1
AVAG00015	706643	706723	DNA/TcMar-Tc1#DNA-7_LMi	21.2	+	278
AVAG00015	722119	722168	LINE/L2#Daphne-35_HRo	10.7	-	3
AVAG00015	741250	742783	DNA/Crypton#Crypton_Av	27.182	+	308
AVAG00015	743833	743884	DNA/CMC-Chapaev-3#Chapaev3-1_HR	11.5	+	75
AVAG00015	743885	743903	LTR/Gypsy#Gypsy-203_AA-LTR	12.5	+	65
AVAG00015	764511	764564	LTR/Gypsy#Gypsy61-I_AG	18.5	-	696
AVAG00015	764512	764572	DNA/Crypton#Crypton-1_CTe	16.6	+	694
AVAG00015	782123	782174	LTR/Gypsy#Gypsy-21_PBa-LTR	15.4	-	60
AVAG00015	782129	782210	DNA/hAT-Blackjack#hAT-4_PBa	28.1	-	66
AVAG00015	782175	782203	DNA/TcMar-Tc1#Mariner-17_AEc	14	-	48
AVAG00015	787358	787394	DNA/RC#rnd-5_family-1739	8.1	+	35
AVAG00015	812866	812915	DNA/PIF-Harbinger#DNA3-13B_CGi	16	-	7
AVAG00016	14200	14377	LTR/Juno-Vesta#Vesta2_Av	14.1	-	0
AVAG00016	17855	17996	DNA#rnd-5_family-3897	24.4	+	0
AVAG00016	50598	51324	LTR/Unknown#ltr-1_family-12	28	+	0
AVAG00016	70049	70510	LINE/I-Jockey#TART_DV	28.6	+	0
AVAG00016	70308	70477	LTR/Ngaro#rnd-5_family-8138	23	+	0
AVAG00016	82327	82571	DNA/RC#Heli1_Av	25.7	-	0
AVAG00016	107853	107927	DNA/Ginger#Ginger2c_Av	18.5	+	0
AVAG00016	118902	119017	DNA/TcMar-Tc1#Tc10_Av	28.4	+	0
AVAG00016	120594	120639	DNA/TcMar-Tc1#rnd-1_family-77	17.4	-	0
AVAG00016	141584	141644	LTR/Gypsy#Gypsy-82_CQ-I	18.3	-	2
AVAG00016	175896	176068	DNA/Ginger#Ginger2e_Av	28	+	0
AVAG00016	211050	211118	LTR/Copia#Copia-1_DAn-I	16.4	-	33
AVAG00016	229760	229773	DNA/RC#Helitron-9_CGi	22.9	+	32
AVAG00016	235018	235074	DNA/P#P-1_LHu	13.6	-	0
AVAG00016	259431	259497	DNA/hAT-Charlie#hAT-11_HRo	16.9	-	11
AVAG00016	265526	265564	LTR/Unknown#ltr-1_family-12	15.4	-	10
AVAG00016	273711	273801	LTR/ERV1#rnd-5_family-4770	19	-	11
AVAG00016	323313	323428	DNA/hAT-Tip100#hAT-13_LSal	21.1	-	109
AVAG00016	338126	339859	DNA/Kolobok-H#rnd-6_family-4463	23.842	+	18
AVAG00016	342981	343033	DNA/PIF-Harbinger#rnd-6_family-3339	6	-	28
AVAG00016	345412	345479	PLE/Penelope-Athena#AthW1-J-R	18.5	-	237
AVAG00016	363650	363687	DNA/PiggyBac-PB#AvPB4	5.3	+	33
AVAG00016	375840	375884	LTR/Pao#BEL-220_AA-I	11.1	-	20
AVAG00016	393098	393198	DNA/TcMar-Tc1#rnd-5_family-77	17.5	-	0
AVAG00016	432647	432730	LTR/Gypsy#Gypsy-37_NVi-I	16.9	+	0
AVAG00016	446517	446609	DNA/RC#Helitron-N1_PBa	18.3	-	1
AVAG00016	462705	462756	LTR/Gypsy#Gypsy61-I_AG	21.6	+	0
AVAG00016	470311	470393	DNA/Maverick#Polinton-8_NVi	25.3	-	5
AVAG00016	495854	495914	DNA/RC#Helitron-3N1_NVi	19.7	-	0
AVAG00016	495867	495916	DNA/hAT-Charlie#hAT-11_HRo	14	-	0
AVAG00016	499054	499139	LTR/Gypsy#Gypsy-28_SI-I	18.1	+	68
AVAG00016	539355	539382	DNA/Maverick#Polinton-4_PBa	21.2	+	8
AVAG00016	539383	539429	DNA/RC#rnd-5_family-1739	17	+	8
AVAG00016	559196	559241	DNA/Crypton#Crypton_Av	13	-	260
AVAG00016	562075	562137	DNA/IS3EU#IS3EU-N1_CGi	14.8	-	0
AVAG00016	562094	562187	DNA/Ginger#Ginger1-1_AC	6.9	-	0
AVAG00016	582835	582918	DNA/RC#rnd-5_family-6308	18.2	-	0
AVAG00016	607061	607116	LINE/I-Jockey#Jockey-5_DPer	20	+	11
AVAG00016	645167	645224	LTR/Gypsy#Gypsy-73_CQ-I	19.7	-	46
AVAG00016	666434	666500	LINE/L2#Daphne-41_LMi	21.5	+	0
AVAG00016	683465	683710	LINE/I-Jockey#TART_DV	24	-	69
AVAG00016	727885	727943	DNA/RC#Helitron-9_CGi	22	+	10
AVAG00016	727981	728308	DNA#rnd-5_family-3897	29.3	+	26
AVAG00016	730090	730442	LTR/Unknown#ltr-1_family-4	11.502	+	0
AVAG00016	735235	735379	LINE/R1#RT1	22.3	+	170
AVAG00016	747797	747856	DNA/PIF-Harbinger#rnd-6_family-3339	16.7	+	0
AVAG00016	760924	760953	LTR/Gypsy#rnd-5_family-1179	10	+	10
AVAG00016	768048	768114	LTR/Pao#BEL-21_DWil-I	21.9	+	0
AVAG00016	787001	787060	DNA/Crypton#Crypton-1_CTe	21.7	-	5
AVAG00016	787014	787085	LINE/L2#L2-2_NVi	18.8	+	5
AVAG00017	11405	11679	DNA/TcMar-Tc1#Tc13_Av	17.6	+	0
AVAG00017	11669	11684	DNA/TcMar-Tc1#PrD37D	23.4	+	0
AVAG00017	11787	11966	DNA/TcMar-Tc1#Tc13_Av	12.8	-	0
AVAG00017	27320	29646	DNA/Dada#rnd-6_family-597	29.891	-	27
AVAG00017	64710	64759	DNA/RC#Helitron-9_CGi	20	-	82
AVAG00017	75363	75423	DNA/Maverick#Polinton-1_ACe	15.8	+	31
AVAG00017	79689	79727	LTR/Gypsy#Gypsy-16_DPu-I	12.8	-	121
AVAG00017	86510	86571	DNA/TcMar-Tc1#Mariner-69_HSal	24.2	+	108
AVAG00017	91116	91419	DNA/MULE-MuDR#MuDR3_Av	32.2	-	0
AVAG00017	110789	110855	LINE/L2#Crack-15_AAe	22.7	+	61
AVAG00017	112594	112634	LINE/L2#Daphne-45_LMi	9.8	+	30
AVAG00017	123399	123940	DNA/PiggyBac#rnd-5_family-2222	19.238	+	0
AVAG00017	126834	126891	LTR/Pao#BEL-180_AA-I	11.7	-	0
AVAG00017	128619	129055	DNA/PiggyBac#rnd-5_family-2222	21.4	+	0
AVAG00017	145505	145561	LTR/Gypsy#rnd-5_family-1179	21.4	+	0
AVAG00017	156284	156391	DNA/RC#rnd-5_family-1739	29.2	-	2
AVAG00017	182126	182172	LINE/CR1#CR1_Ele3	21.3	-	0
AVAG00017	182391	182432	LINE/RTE#RTE2a_Av	16.7	-	0
AVAG00017	198186	198258	PLE/Penelope#Penelope-6_HRo	23.6	-	4
AVAG00017	203736	203808	DNA/Maverick#Polinton-8_NVi	22.6	-	1
AVAG00017	209817	209873	LTR/Gypsy#Gypsy-6_HMM-I	22.8	-	0
AVAG00017	232914	232966	LTR/Gypsy#rnd-6_family-4491	18.9	-	0
AVAG00017	261578	261635	LTR/Gypsy#Gypsy-72_AA-I	22.4	+	58
AVAG00017	268346	268406	DNA/RC#Heli3a_Av	18.7	-	0
AVAG00017	273008	273115	DNA/Maverick#Polinton-3_PBa	21.4	-	0
AVAG00017	277158	277198	DNA#DNA-11_CGi	14.6	+	1
AVAG00017	334112	334156	LTR/Gypsy#Gypsy-1_DVir-LTR	15.6	-	0
AVAG00017	340766	340837	PLE/Penelope-Athena#AthX-V-S	21.7	+	2
AVAG00017	340790	340801	LINE/L2#Kiri-6_AAe	24.6	-	2
AVAG00017	340802	340846	LTR/ERV1#rnd-5_family-4770	13.3	+	2
AVAG00017	340809	340858	LTR/Gypsy#Gypsy-1_AC-I	18	+	2
AVAG00017	343863	343926	LINE/L1#L1-49_LSal	6.1	-	119
AVAG00017	359443	359662	DNA/CMC-EnSpm#EnSpm3_Av	22.917	-	0
AVAG00017	374909	374984	PLE/Penelope-Athena#AthJ-N	24.6	-	238
AVAG00017	374932	374999	LTR/Gypsy#Gypsy37-I_AG	17.3	+	235
AVAG00017	374984	375010	LTR/Gypsy#Gypsy55-I_AG	23	-	194
AVAG00017	406834	406866	DNA/Dada#rnd-6_family-597	9.1	+	231
AVAG00017	406938	406971	DNA/PIF-Harbinger#Harbinger-1_AAe	11.8	-	226
AVAG00017	407832	407880	LTR/Pao#BEL-227_AA-I	14.3	-	177
AVAG00017	423574	423651	LINE/L2#L2-19_HRo	22.7	-	2
AVAG00017	430649	430705	LINE/I-Jockey#Jockey-14_AAe	19.6	+	4
AVAG00017	447668	447724	DNA/Maverick#Polinton-2_ACe	21.9	+	229
AVAG00017	447684	447734	LTR/Ngaro#rnd-6_family-5579	19.6	+	234
AVAG00017	448824	448874	LINE/I-Jockey#HeT-A3_DVi	21.6	+	23
AVAG00017	466739	466805	LINE/I-Jockey#TART_DV	19.4	-	60
AVAG00017	469612	469624	DNA/RC#rnd-5_family-1739	27	-	18
AVAG00017	493989	494063	DNA/RC#rnd-5_family-1739	9.3	-	338
AVAG00017	516403	516445	LINE/L2#Daphne-19_HRo	7.5	+	1032
AVAG00017	522382	522438	LINE/I-Jockey#Jockey_Ele3	9.4	-	7
AVAG00017	522946	523176	LTR/Juno-Vesta#Vesta1b_Av	4.9	+	4
AVAG00017	523236	523372	DNA/RC#Heli1_Av	16.4	-	2
AVAG00017	530170	530240	DNA/Kolobok-Hydra#Kolobok-7_CGi	28	+	0
AVAG00017	532015	532035	DNA/PIF-ISL2EU#ISL2EU-15_CGi	26.3	-	0
AVAG00017	550907	550990	DNA#DNA-11_CGi	17.2	-	88
AVAG00017	550943	551008	DNA/Crypton-A#Crypton-4_CGi	12.3	-	88
AVAG00017	553621	553659	DNA/PiggyBac#piggyBac-2_HRo	12.8	+	55
AVAG00017	558949	559042	LTR/Unknown#ltr-1_family-4	25.5	+	0
AVAG00017	580631	580681	LINE/CR1#CR1_Ele9	11.8	+	280
AVAG00017	582347	582399	LTR/Gypsy#Gypsy-29_DWil-I	15.1	-	12
AVAG00017	593373	593433	LTR/Gypsy#Gypsy-14_CFl-I	13.6	+	0
AVAG00017	618246	618369	PLE/Penelope-Athena#AthW2-1	19.8	-	0
AVAG00017	624535	624692	DNA/MULE-MuDR#MULE2_Av	25.9	+	0
AVAG00017	630701	630759	PLE/Penelope-Athena#AthL3	23.7	-	0
AVAG00017	630835	630880	PLE/Penelope#rnd-5_family-3182	13	-	0
AVAG00017	632111	632442	PLE/Penelope-Athena#AthL1a	15.4	+	0
AVAG00017	632449	633294	PLE/Penelope-Athena#AthX-V-S	30.8	+	0
AVAG00017	634016	634090	DNA/hAT-Charlie#hAT-N2_LSal	17.8	+	0
AVAG00017	638336	638401	LTR/Gypsy#Gypsy-15_CFl-I	15.9	+	6
AVAG00017	640484	640683	DNA/TcMar-Pogo#pogo13_Av	34	+	0
AVAG00017	641303	641826	DNA/Ginger#Ginger2d_Av	23.074	+	0
AVAG00017	641318	641377	DNA/Ginger#Ginger2d_Av	20.3	-	0
AVAG00017	642528	644215	DNA/MULE-MuDR#MuDR3_Av	28.048	+	2
AVAG00017	644048	644216	DNA/MULE-MuDR#rnd-1_family-39	27.8	-	0
AVAG00017	644623	645636	DNA/hAT-Ac#rnd-5_family-2166	31.7	-	40
AVAG00017	647463	648109	DNA/TcMar-Tc1#Tc10_Av	25.147	-	2
AVAG00017	656548	657011	DNA/TcMar-Tc1#Tc2_Av	25	+	5
AVAG00017	658729	658804	PLE/Penelope#Penelope3_Av	18.9	-	0
AVAG00017	658827	661792	PLE/Penelope#Penelope3b_Av	0	-	0
AVAG00017	661993	662015	DNA/CMC-EnSpm#EnSpm3_Av	23.2	-	0
AVAG00017	663400	663479	DNA/TcMar-Tc4#rnd-6_family-3210	26.2	+	1
AVAG00017	666855	666980	DNA/hAT#hAT2_Av	17.9	+	0
AVAG00017	667031	667151	PLE/Penelope-Athena#AthW1	15.9	+	0
AVAG00017	674522	674781	DNA/RC#rnd-1_family-128	25.4	+	0
AVAG00017	675596	676017	DNA/TcMar-Sagan#rnd-5_family-5498	25.9	-	0
AVAG00017	676252	676778	DNA/TcMar-Tc1#Tc10_Av	31.4	-	0
AVAG00017	677438	677489	DNA/Ginger#Ginger2e_Av	17.3	-	0
AVAG00017	693317	693779	PLE/Penelope-Athena#AthX-V-T	21.114	-	0
AVAG00017	701538	701658	DNA/TcMar-Tc1#Tc13_Av	29.4	+	0
AVAG00017	706066	706167	DNA/MULE-MuDR#MuDR14_Av	24.8	+	0
AVAG00017	715125	715215	PLE/Penelope#Penelope1a_Av	21.1	-	0
AVAG00017	723649	723911	DNA/hAT-Ac#rnd-5_family-2166	31	+	0
AVAG00017	727743	727788	LTR/Gypsy#Gypsy-1_HAS-I	17.4	-	2
AVAG00017	736498	736553	DNA/MULE-MuDR#MuDR8_Av	14.3	+	1
AVAG00017	742756	742985	DNA/hAT-Ac#rnd-5_family-2166	24.6	-	8
AVAG00017	752758	752815	DNA/MULE-MuDR#rnd-1_family-39	22.4	+	0
AVAG00017	753047	753204	LTR/Unknown#ltr-1_family-24	28.4	-	4
AVAG00018	11738	11809	PLE/Penelope-Athena#AthW1-J-R	19.7	-	183
AVAG00018	41473	41510	DNA/PIF-Harbinger#rnd-5_family-455	10.8	+	8
AVAG00018	42936	59344	LTR/Gypsy#rnd-6_family-4491	0.941	+	8209
AVAG00018	43006	58201	LTR/Gypsy#rnd-6_family-4491	1.2	+	5989
AVAG00018	60630	60676	DNA/hAT#DNA8-13_CQ	21.3	+	25
AVAG00018	70481	70715	DNA/hAT-Ac#rnd-5_family-2166	27.6	+	101
AVAG00018	125759	125809	LINE/L2#Daphne-49_LMi	21.6	+	0
AVAG00018	184392	184463	DNA/Maverick#Polinton-8_NVi	25	+	1
AVAG00018	196781	196834	DNA/PIF-Harbinger#rnd-6_family-3339	15.7	-	0
AVAG00018	199295	199409	DNA#DNA-11_CGi	31.6	+	2
AVAG00018	201151	201211	DNA/RC#Helitron-N34_CGi	8.5	+	3
AVAG00018	210530	210583	LINE/CR1#CR1-62_AAe	15.4	-	98
AVAG00018	211680	211736	DNA/hAT-Tip100#hAT-6_HRo	19.3	+	0
AVAG00018	220487	220502	PLE/Penelope-Athena#AthP1	17.6	-	1
AVAG00018	236782	236888	LTR/Gypsy#Gypsy5-I_Dya	24.8	+	88
AVAG00018	245758	245825	LINE/L2#L2-8_NVi	13.2	-	40
AVAG00018	281161	281216	DNA/Ginger#Ginger1-2_AP	16.1	-	1
AVAG00018	291571	291782	DNA/hAT-Ac#rnd-5_family-2166	24.9	+	7
AVAG00018	303251	303306	DNA#DNA8-16_LMi	26.8	-	2
AVAG00018	309767	309803	LTR/Gypsy#BLOOD_LTR	8.1	+	0
AVAG00018	382208	382249	LTR/Pao#rnd-5_family-4074	9.5	+	164
AVAG00018	407186	407392	DNA#rnd-5_family-3897	27.1	-	8
AVAG00018	421757	422693	DNA/hAT-Ac#rnd-5_family-2166	26.9	+	0
AVAG00018	423491	423545	DNA/RC#Helitron-1_LG	8.5	-	0
AVAG00018	425444	425667	LTR/Unknown#ltr-1_family-24	21.9	-	0
AVAG00018	426237	426298	LTR/Juno-Vesta#Vesta1b_Av	25.8	-	0
AVAG00018	432954	433771	LTR/Ngaro#rnd-6_family-5579	25.931	-	4
AVAG00018	457835	457985	DNA/PIF-ISL2EU#ISL2EU2_Av	24.7	-	0
AVAG00018	473106	473166	LTR/Pao#rnd-5_family-4074	19.7	-	0
AVAG00018	477428	478412	DNA/hAT-Ac#rnd-5_family-2166	19.5	-	21
AVAG00018	486416	486587	DNA/RC#Heli3a_Av	25.7	+	0
AVAG00018	488409	488972	DNA/hAT-hobo#rnd-5_family-982	29.7	-	0
AVAG00018	488875	489189	DNA/hAT-hobo#rnd-5_family-982	30.5	+	0
AVAG00018	489143	489200	DNA/CMC-EnSpm#CACTA2_Av	18.2	-	0
AVAG00018	489982	490054	DNA/P#P3_Av	20.6	-	0
AVAG00018	490336	490812	LTR/Juno-Vesta#Vesta1a_Av	7.6	-	0
AVAG00018	505386	505489	LTR/Pao#rnd-5_family-4074	22.2	-	1
AVAG00018	521452	521511	DNA/MULE-MuDR#rnd-1_family-39	16.9	+	0
AVAG00018	525687	525702	LINE/I-Jockey#TART_DV	31.7	+	0
AVAG00018	525998	526868	DNA/hAT-Ac#rnd-5_family-2166	26.5	+	4
AVAG00018	530278	530321	PLE/Penelope-Athena#AthQ	15.9	+	0
AVAG00018	545281	545613	LINE/CR1#CR1-2_CQ	22.2	+	0
AVAG00018	545338	546100	LINE/I-Jockey#TART_DV	21.6	+	0
AVAG00018	545712	546101	LINE/CR1#CR1-2_CQ	25.3	+	0
AVAG00018	546525	547553	DNA/hAT-Ac#rnd-5_family-2166	26.1	+	0
AVAG00018	551472	551669	LINE/L2#rnd-5_family-1308	14.9	+	0
AVAG00018	551494	551671	LINE/Soliton#Soliton8_Av	4	+	0
AVAG00018	551809	552709	PLE/Penelope-Athena#AthJ-N	26.064	+	0
AVAG00018	552864	552911	PLE/Penelope-Athena#AthK-V	20.8	-	0
AVAG00018	553003	553048	DNA/MULE-MuDR#rnd-1_family-39	8.7	+	0
AVAG00018	553016	553060	DNA/MULE-MuDR#MuDR3_Av	12	+	0
AVAG00018	553061	554094	DNA/MULE-MuDR#rnd-1_family-39	8.603	-	0
AVAG00018	565466	565500	DNA/RC#rnd-5_family-274	21.7	-	0
AVAG00018	566261	566297	DNA/RC#Helitron-N12_CGi	13.5	-	5
AVAG00018	567230	567490	DNA/hAT#hAT19_Av	13.4	-	0
AVAG00018	581735	581821	DNA/MULE-MuDR#rnd-1_family-39	18.3	-	1
AVAG00018	591288	591371	PLE/Penelope-Athena#AthJ-N-W1	17.9	+	0
AVAG00018	600450	600475	DNA/PIF-Spy#rnd-5_family-6640	3.9	+	0
AVAG00018	603509	603582	LTR/Copia#Copia-1_CQ-I	22.9	-	0
AVAG00018	603641	604332	PLE/Penelope-Athena#AthK1	27.4	-	0
AVAG00018	643480	643553	LTR/TelKA#TelKA3b_Av	20.6	-	3
AVAG00018	702620	702804	DNA/P#P7_Av	32.4	-	0
AVAG00018	718910	719293	DNA/Kolobok-H#rnd-6_family-4463	27	+	47
AVAG00018	728044	728077	LTR/Copia#Copia14-NVi_I	8.8	-	0
AVAG00018	751267	751313	PLE/Penelope-Athena#AthM	13.1	-	0
AVAG00018	751710	751745	LTR/TelKA#TelKA4_Av	8.3	-	0
AVAG00018	751844	751979	DNA/TcMar-Pogo#pogo4_Av	17.8	+	0
AVAG00018	752369	757744	DNA/TcMar-Sagan#rnd-5_family-5498	26.78	+	9
AVAG00018	752658	754053	DNA/TcMar-Mariner#Avmar11_Av	26.914	+	4
AVAG00018	757202	757474	DNA/TcMar-Sagan#rnd-5_family-5498	29.4	-	4
AVAG00018	757238	757341	DNA/TcMar-Mariner#Avmar11_Av	20.6	+	2
AVAG00018	758700	758816	DNA/hAT-hobo#rnd-5_family-982	31.9	+	0
AVAG00018	760983	761156	DNA/RC#rnd-1_family-128	18.971	-	9
AVAG00018	761227	761278	DNA/TcMar-Pogo#pogo1_Av	19.2	-	9
AVAG00018	761300	761326	DNA/TcMar-Tc1#Tc6_Av	0	+	9
AVAG00018	763797	763881	DNA/TcMar-Mariner#Avmar1b_Av	31	+	10
AVAG00018	768726	771764	DNA/Sola#Sola2c_Av	29.912	-	2
AVAG00018	772410	772510	DNA/MULE-MuDR#MULE5_Av	30.3	+	0
AVAG00018	772808	772873	DNA/MULE-MuDR#MuDR13_Av	20	+	0
AVAG00019	688	832	DNA/MULE-MuDR#MuDR1_Av	20	+	5
AVAG00019	4287	4343	DNA/RC#Heli2_Av_cons	14	-	0
AVAG00019	8148	8205	DNA/MULE-MuDR#MuDR14_Av	22.8	-	0
AVAG00019	19068	19123	LINE/I#Nimb-40_LMi	26.8	+	0
AVAG00019	21574	21695	PLE/Penelope-Athena#AthJ-N-W1	29.7	-	0
AVAG00019	33187	33324	DNA/hAT#hAT25_Av	26.1	-	0
AVAG00019	36129	36175	LTR/Gypsy#rnd-5_family-1179	13.1	-	0
AVAG00019	38477	38517	LINE/CR1#CR1-13_CQ	17.1	-	0
AVAG00019	41320	41374	DNA/MULE-MuDR#rnd-1_family-39	16.4	+	0
AVAG00019	66816	66895	PLE/Penelope#Penelope1_Av	11	-	0
AVAG00019	67302	69487	PLE/Penelope#Penelope1_Av	17.103	-	0
AVAG00019	89437	89476	DNA/hAT-hobo#hAT-6_DBp	15	-	1
AVAG00019	93702	93822	DNA/Kolobok-H#rnd-6_family-1024	25	+	145
AVAG00019	99191	99290	LTR/Gypsy#rnd-5_family-1179	30	+	1
AVAG00019	107331	107389	DNA/Maverick#Polinton-2_RPr	25.4	+	1
AVAG00019	128669	128704	LTR/Pao#BEL-3_LG-I	8.3	-	0
AVAG00019	163706	163756	LINE/L2#Daphne-12_LMi	8.8	-	40
AVAG00019	204692	204764	DNA/PIF-ISL2EU#ISL2EU-8_CGi	22.6	+	0
AVAG00019	206464	206521	DNA/hAT-hobo#rnd-5_family-982	21.1	+	0
AVAG00019	206494	206755	DNA/hAT-hobo#rnd-5_family-982	23.145	-	0
AVAG00019	238091	238169	DNA/Maverick#Polinton-2_DEu	21.1	+	1018
AVAG00019	260160	260207	LTR/Pao#BEL-4_DAn-I	14.9	-	1
AVAG00019	271314	271364	DNA/Crypton#Crypton-1_CTe	14.2	+	13
AVAG00019	319989	320100	DNA/TcMar-Mariner#rnd-6_family-704	24.1	+	0
AVAG00019	327069	327287	DNA/TcMar-Mariner#rnd-1_family-149	21.1	-	0
AVAG00019	327299	327342	DNA/PIF-Harbinger#rnd-5_family-455	4.8	-	0
AVAG00019	336178	336308	DNA/TcMar-Tc1#Tc10_Av	30.5	-	0
AVAG00019	337725	337889	DNA/Merlin#Merlin1_Av	18.9	+	0
AVAG00019	339042	339123	LTR/Gypsy#rnd-6_family-4491	22.5	-	0
AVAG00019	339997	340097	DNA/TcMar-Mariner#Avmar1a_Av	16	-	0
AVAG00019	340085	340178	DNA/TcMar-Mariner#rnd-1_family-112	22.3	-	0
AVAG00019	343964	343992	LTR/Juno-Vesta#Vesta5_Av	6.9	+	0
AVAG00019	344716	345176	DNA/TcMar-Pogo#pogo10_Av	22.4	+	0
AVAG00019	352596	352754	DNA/hAT#hAT3a_Av	31.6	-	0
AVAG00019	356165	358077	DNA/PiggyBac-Pokey#Pokey2_Av	17.9	-	0
AVAG00019	358083	358347	DNA/PiggyBac-Pokey#Pokey1_Av	4.9	-	0
AVAG00019	358348	358672	DNA/P#P8_Av	32.9	-	0
AVAG00019	358895	359828	DNA/P#P4_Av	34.142	-	0
AVAG00019	378595	379965	LINE/Soliton#Soliton7_Av	34.3	+	0
AVAG00019	396761	396881	DNA/TcMar-Tc1#rnd-1_family-77	27.1	-	0
AVAG00019	422275	422314	DNA/CMC-Transib#Transib-1_DRh	15	-	0
AVAG00019	427602	427669	LTR/DIRS#DIRS-6_DPu	27.9	+	61
AVAG00019	443089	443188	DNA/MULE-MuDR#rnd-1_family-39	27.5	+	0
AVAG00019	457907	459058	DNA/hAT#hAT7_Av	26.962	-	1
AVAG00019	459071	459349	LTR/Gypsy#Gypsy-8_CGi-I	28.5	-	0
AVAG00019	459415	459543	PLE/Penelope#Penelope6_Av	21.9	-	0
AVAG00019	473599	473746	DNA/MULE-MuDR#MULE2_Av	20.9	-	0
AVAG00019	473842	474142	DNA/Kolobok#Kolobok_Av	25.2	+	0
AVAG00019	473924	474180	DNA/Kolobok-Hydra#rnd-5_family-995	22.9	+	0
AVAG00019	474216	474417	DNA/Sola#Sola2d_Av	25.8	+	0
AVAG00019	490959	491021	LINE/R1-LOA#LOA-6_CQ	18	-	0
AVAG00019	494055	494097	DNA/hAT-Tip100#PrTip	20.9	-	3
AVAG00019	524439	524486	LTR/Pao#BEL-12_LG-I	13.1	-	2
AVAG00019	525312	525392	DNA/PiggyBac#rnd-5_family-6513	23.7	+	0
AVAG00019	556931	556988	DNA/TcMar-Pogo#pogo5_Av	22.4	+	0
AVAG00019	557794	557866	LTR/Copia#Copia_I	16.2	+	96
AVAG00019	564714	565044	LTR/TelKA#TelKA3b_Av	10.4	+	1
AVAG00019	664179	664230	PLE/Penelope-Athena#AthJ-N-W1	15.7	+	94
AVAG00019	668676	668776	LINE/I-Jockey#TART_DV	14	+	174
AVAG00019	668686	668805	PLE/Penelope-Athena#AthL3	19.6	+	183
AVAG00019	685540	685594	PLE/Penelope#Penelope-51_LMi	18.2	+	0
AVAG00019	706124	706565	PLE/Penelope-Athena#AthP1	8.581	+	0
AVAG00019	710561	710623	PLE/Penelope-Athena#AthL3	22.2	-	18
AVAG00019	744621	744688	DNA#DNA3-8_LMi	18.8	-	19
AVAG00019	744640	744702	SINE/tRNA-Deu#BivaMD-SINE1_TeGr	22.6	-	19
AVAG00019	746444	746517	DNA/Kolobok-H#rnd-6_family-4463	25.7	-	263
AVAG00019	755452	755497	DNA/RC#Helitron-8_CGi	15.6	+	6
AVAG00019	761509	761541	LTR/Juno-Vesta#Juno2_Av	9.1	+	0
AVAG00020	1905	2457	DNA/Kolobok-H#rnd-6_family-1024	30.6	-	0
AVAG00020	11974	12122	LTR/Unknown#ltr-1_family-24	21.6	+	0
AVAG00020	18262	18298	DNA/MULE-MuDR#MULE5_Av	16.2	-	0
AVAG00020	18290	18345	LTR/Pao#BEL-85_AA-I	14.5	+	0
AVAG00020	23292	24937	DNA/MULE-MuDR#MuDR3_Av	0.414	+	0
AVAG00020	41425	42441	DNA/hAT-Ac#rnd-5_family-2166	27.5	-	23
AVAG00020	42780	43005	DNA/TcMar-Tc1#rnd-5_family-77	34.5	+	1
AVAG00020	94276	94350	DNA/RC#rnd-1_family-259	32	+	0
AVAG00020	103571	103806	LTR/Unknown#ltr-1_family-24	6.4	+	3
AVAG00020	113851	114355	LTR/Ngaro#rnd-5_family-8138	21.8	-	2
AVAG00020	132587	133154	LTR/Unknown#ltr-1_family-4	15.235	-	0
AVAG00020	140190	140279	DNA/Maverick#Polinton-1_DY	28.8	-	4
AVAG00020	149664	149786	DNA/PiggyBac-PB#AvPB1	18	-	0
AVAG00020	182402	182456	DNA/TcMar-Tc4#Mariner3-4_LMi	14.1	-	3
AVAG00020	200326	200608	DNA/MULE-MuDR#MuDR2_Av	2.9	+	0
AVAG00020	208709	208958	DNA/PiggyBac-Pokey#Pokey1_Av	24.8	+	0
AVAG00020	208970	210766	DNA/PiggyBac-Pokey#Pokey2_Av	25.2	+	10
AVAG00020	212847	213352	DNA/PiggyBac-Pokey#Pokey1_Av	24.5	+	0
AVAG00020	221341	221420	DNA/hAT-Tip100#hAT-17_LMi	16	-	0
AVAG00020	224259	224359	PLE/Penelope-Athena#AthW2-1	30.3	-	0
AVAG00020	245207	245260	DNA/TcMar-Pogo#pogo2_Av	22.2	+	0
AVAG00020	249853	249928	DNA/MULE-MuDR#rnd-1_family-39	19.4	-	1
AVAG00020	275976	276025	LTR/Copia#Copia-6_AG-I	24	-	0
AVAG00020	309087	309278	LTR/Pao#rnd-5_family-4074	27.6	-	253
AVAG00020	309315	309562	LTR/Pao#rnd-5_family-4074	27.9	-	271
AVAG00020	339685	339740	LINE/CR1#CR1-12_DTa	9.9	-	8
AVAG00020	360623	360711	DNA#DNA-5_LMi	25	+	0
AVAG00020	374166	374302	DNA/TcMar-Pogo#pogo5_Av	25	+	0
AVAG00020	374661	374797	DNA/TcMar-Pogo#pogo5_Av	25.7	-	0
AVAG00020	379936	380229	LTR/Ngaro#rnd-6_family-5579	28.6	+	4
AVAG00020	392640	392742	DNA/RC#rnd-5_family-1739	27.2	-	0
AVAG00020	393028	393137	PLE/Penelope-Athena#AthW-J	34.5	-	0
AVAG00020	394947	395049	DNA/RC#rnd-5_family-1739	26.2	-	0
AVAG00020	399249	399312	DNA/PiggyBac#rnd-1_family-235	21.9	-	1
AVAG00020	406689	406784	DNA/MULE-MuDR#rnd-1_family-39	13.9	-	0
AVAG00020	420413	420516	PLE/Penelope-Athena#AthK-V	21.1	-	0
AVAG00020	420452	420556	DNA/TcMar-Mariner#rnd-5_family-605	18	+	0
AVAG00020	420455	420476	DNA/RC#rnd-5_family-1739	25.1	+	0
AVAG00020	428781	428870	DNA/TcMar-Tc1#Tc2_Av	30	+	0
AVAG00020	429219	429308	DNA/TcMar-Tc1#Tc2_Av	30	+	0
AVAG00020	449121	449172	DNA/RC#Helitron-2_DVir	9.8	-	45
AVAG00020	464150	464459	DNA/TcMar-Sagan#rnd-5_family-5498	5.8	+	0
AVAG00020	464492	466079	DNA/TcMar-Sagan#rnd-5_family-5498	11.647	-	0
AVAG00020	468167	468857	DNA/TcMar-Pogo#pogo1_Av	11.689	-	0
AVAG00020	483686	483752	DNA/P#P3_Av	16.2	+	34
AVAG00020	505175	505383	DNA/RC#Heli1_Av	17.9	+	4
AVAG00020	514083	514123	DNA/PIF-Spy#rnd-5_family-6640	17.1	+	0
AVAG00020	518899	519222	DNA/Kolobok-H#rnd-6_family-4463	24.1	+	8
AVAG00020	538232	538410	DNA/hAT-Ac#rnd-5_family-2166	20.1	+	0
AVAG00020	538611	538682	DNA/TcMar-Tigger#Tigger2_Av	18.3	+	0
AVAG00020	555165	555202	LTR/Pao#BEL-5_LSal-I	13.2	+	13
AVAG00020	567709	567975	DNA/hAT-Ac#rnd-5_family-2166	29.6	-	0
AVAG00020	572643	575552	DNA/Ginger#Ginger2c_Av	0.258	+	2
AVAG00020	579100	579186	LINE/I-Jockey#Jockey-6_DK	30.6	-	16
AVAG00020	579135	579195	LINE/L2#Crack-2_AAe	16.4	+	16
AVAG00020	579416	579467	DNA/Zator#Zator-3N1_CGi	10.5	+	91
AVAG00020	589774	589823	DNA/TcMar-Tc4#Mariner3-3_HSal	20	-	5
AVAG00020	623925	623941	PLE/Penelope#rnd-6_family-5747	18.6	-	0
AVAG00020	623953	624014	LTR/ERV1#rnd-5_family-4770	20.4	+	0
AVAG00020	624714	624818	DNA/Kolobok-T2?#Kolobok-N1_AEc	22.8	-	0
AVAG00020	624769	624780	DNA/hAT-Tip100#hAT-6_HRo	24.1	+	0
AVAG00020	624781	624823	LTR/Gypsy#Gypsy-10_PBa-LTR	11.6	+	0
AVAG00020	624818	624854	LTR/Gypsy#Gypsy-17_LG-I	10.8	+	0
AVAG00020	654442	654487	LTR/Pao#BEL-3_CT-I	14	-	6
AVAG00020	674303	674398	PLE/Penelope#rnd-5_family-39	24	-	2
AVAG00020	704226	704258	DNA/TcMar-Tigger#Tigger_Av	9.1	-	117
AVAG00020	714745	714791	PLE/Penelope#rnd-5_family-39	10.6	+	1
AVAG00020	715597	715685	DNA#DNA2-7_CGi	23	+	0
AVAG00020	715811	715843	LINE/L1#L1-16_LSal	3	+	2
AVAG00020	725247	725304	LTR/Gypsy#rnd-5_family-1179	14.9	-	26
AVAG00020	731713	731781	DNA/RC#Helitron-5_NVi	20.6	+	85
AVAG00020	750341	757897	LINE/R2-R9#R9a_Av	29.863	-	0
AVAG00020	757928	758072	LINE/R2#rnd-5_family-2967	9	-	0
AVAG00020	758073	758789	LINE/R2-R9#R9_Av	28.029	-	7
AVAG00020	758448	758695	LINE/R2#rnd-5_family-2967	29.6	-	6
AVAG00020	758800	759327	LINE/I-Jockey#rnd-5_family-2780	25.3	-	4
AVAG00021	10792	11094	DNA/RC#Heli3_Av	30.1	+	0
AVAG00021	17859	18177	DNA/PiggyBac#piggyBac6_Av	24.941	+	0
AVAG00021	24377	28093	LINE/I-Jockey#Hebe_Av	16.2	+	6
AVAG00021	28091	31064	DNA/Sola#Sola2_Av	0.5	+	4
AVAG00021	31174	31238	DNA/P#P3_Av	23.4	-	0
AVAG00021	31636	32090	DNA/Kolobok-H#rnd-6_family-1024	27.195	-	2
AVAG00021	38960	39077	DNA/TcMar-Pogo#pogo8_Av	35.6	-	0
AVAG00021	39292	39377	DNA/hAT-hobo#rnd-5_family-982	21.4	+	0
AVAG00021	57997	58048	DNA/PIF-Harbinger#rnd-6_family-3339	13.7	-	0
AVAG00021	66146	66208	LINE/Soliton#Soliton8_Av	15.3	-	0
AVAG00021	70568	70630	DNA/hAT#hAT26_Av	23.8	-	0
AVAG00021	70873	70932	LTR/Gypsy#BLOOD_LTR	22	-	0
AVAG00021	78067	78288	DNA/PiggyBac-Looper#Looper3_Av	29.764	-	0
AVAG00021	79835	79929	DNA/TcMar-Tc1#Tc11_Av	17.2	-	0
AVAG00021	80057	80255	DNA/TcMar-Tc1#Tc11_Av	29.4	+	0
AVAG00021	98842	98896	DNA/MULE-MuDR#rnd-1_family-39	18.9	+	0
AVAG00021	103264	103339	LTR/Gypsy#Gypsy-142_AA-I	20.5	+	2
AVAG00021	111876	111995	DNA/TcMar-Mariner#rnd-6_family-704	26.3	-	0
AVAG00021	116440	116483	DNA/TcMar-Pogo#pogo13_Av	18.2	+	0
AVAG00021	116631	116697	DNA/hAT-hobo#rnd-5_family-982	18.2	-	0
AVAG00021	138051	138204	LTR/Unknown#ltr-1_family-24	17.1	+	0
AVAG00021	147260	147386	DNA/hAT#hAT30_Av	20.5	-	0
AVAG00021	147264	147407	DNA/TcMar-Tc1#Tc6_Av	29.1	-	0
AVAG00021	155882	155944	DNA/hAT#hAT1_Av	21.2	+	0
AVAG00021	156286	156514	PLE/Penelope#Penelope1a_Av	16.9	+	0
AVAG00021	156595	156726	LTR/Gypsy#ltr-1_family-21	28.8	+	0
AVAG00021	156979	157035	LTR/Gypsy#Gypsy-21_AA-I	21.4	+	0
AVAG00021	157044	157572	LTR/Gypsy#ltr-1_family-19	29.9	-	0
AVAG00021	168382	168447	LTR/Gypsy#Gypsy-43_DWil-I	28.4	+	5
AVAG00021	168578	168676	LTR/Ngaro#rnd-6_family-5579	20.2	+	18
AVAG00021	168651	168718	LINE/L2#Kiri-18_AAe	23.5	-	13
AVAG00021	169699	170644	DNA/hAT-Ac#rnd-5_family-2166	26.1	+	31
AVAG00021	181917	181967	DNA/hAT-Blackjack#hAT-34_LMi	14.3	+	0
AVAG00021	184085	184302	DNA/hAT-hobo#rnd-5_family-982	24.9	-	0
AVAG00021	186560	186654	DNA/CMC-EnSpm#CACTA2_Av	12.6	+	0
AVAG00021	186722	187443	DNA/TcMar-Tc1#Tc21_Av	34.3	+	0
AVAG00021	190487	190537	DNA/hAT-Blackjack#hAT-34_LMi	16.4	+	0
AVAG00021	192653	192846	DNA/hAT-hobo#rnd-5_family-982	27.4	-	0
AVAG00021	194959	195043	DNA/CMC-EnSpm#CACTA2_Av	12.9	+	0
AVAG00021	195122	195850	DNA/TcMar-Tc1#Tc21_Av	33.2	+	0
AVAG00021	198139	198274	LINE/Soliton#Soliton8_Av	5	+	0
AVAG00021	199980	200085	LINE/I-Jockey#rnd-5_family-2780	26.8	+	0
AVAG00021	200115	206324	LINE/I-Jockey#Hebe_Av	17.915	+	0
AVAG00021	205025	205467	DNA/TcMar-Tc1#rnd-1_family-146	30.1	+	0
AVAG00021	216141	216187	DNA/PIF-Harbinger#rnd-5_family-455	14.1	+	0
AVAG00021	221084	221135	DNA/PIF-Harbinger#rnd-5_family-455	20	-	0
AVAG00021	228263	228467	DNA/TcMar-Tc1#Tc18_Av	33.8	-	0
AVAG00021	237349	237405	DNA/hAT#HAT16_CB	10.2	+	0
AVAG00021	239987	240343	LINE/I-Jockey#rnd-1_family-15	10.1	+	0
AVAG00021	243573	244496	LINE/I-Jockey#Hebe_Av	19.6	+	0
AVAG00021	246396	250828	DNA/Kolobok#Kolobok3_Av	0.6	+	4
AVAG00021	254456	255466	DNA/hAT-Ac#rnd-5_family-2166	26.2	+	1
AVAG00021	255948	255989	DNA/PiggyBac#piggyBac2_Av	7.3	+	0
AVAG00021	255985	256057	LTR/Juno-Vesta#Vesta6c_Av	17.2	-	0
AVAG00021	256058	257111	LTR/Gypsy#ltr-1_family-6	11.795	+	0
AVAG00021	263222	263288	DNA/MULE-MuDR#rnd-1_family-39	11.9	-	0
AVAG00021	277227	277373	DNA/TcMar-Pogo#pogo5_Av	33.3	-	6
AVAG00021	281155	281194	LTR/Gypsy#Gypsy-9_LVa-I	15	-	38
AVAG00021	286449	286827	LTR/Unknown#ltr-1_family-4	25.7	+	0
AVAG00021	287697	287841	LTR/Pao#rnd-5_family-4074	21.8	-	3
AVAG00021	288295	289895	LTR/Pao#rnd-5_family-4074	26.705	-	351
AVAG00021	292439	292497	PLE/Penelope-Athena#AthL1a	16.9	-	3
AVAG00021	296720	297217	LINE/I-Jockey#rnd-6_family-1973	32.9	+	0
AVAG00021	305653	306296	DNA/hAT#hAT15_Av	25.721	+	0
AVAG00021	330793	331712	DNA/TcMar-Tc1#Tc19_Av	27.77	+	0
AVAG00021	347772	347814	DNA/P#Galileo_DB	13.9	+	1
AVAG00021	372440	372486	LTR/Ngaro#DIRS-4_CGi	12.8	+	3
AVAG00021	383565	383634	DNA/PIF-Harbinger#Harbinger-4_CGi	9.6	-	1
AVAG00021	383596	383645	DNA/RC#Helitron-N35_CGi	12	-	0
AVAG00021	387789	387830	LINE/RTE-BovB#RTE-44_LMi	7.1	+	8
AVAG00021	396978	397039	LTR/Gypsy#Gypsy-10_DVir-LTR	13.1	+	0
AVAG00021	406213	407606	DNA/TcMar-Mariner#Avmar5a_Av	17.5	-	0
AVAG00021	407661	407766	DNA/TcMar-Mariner#Avmar5a_Av	15.4	+	0
AVAG00021	418807	418974	LTR/Unknown#ltr-1_family-4	26.8	-	0
AVAG00021	425225	425341	LINE/L1#L1_Ele5	32.2	-	996
AVAG00021	469021	469063	PLE/Penelope#Penelope-3_LVa	11.6	+	6
AVAG00021	494270	494310	DNA/hAT-Tip100#hAT-N16_LMi	17.1	-	0
AVAG00021	512433	512466	DNA/Sola-1#Sola1-5_CGi	5.9	-	2
AVAG00021	522219	522339	LINE/I-Jockey#TART_DV	21.9	+	39
AVAG00021	522776	522820	SINE/tRNA-Core#OK	13.3	+	0
AVAG00021	522781	522825	LTR/Gypsy#Gypsy-16_PBa-LTR	15.6	-	1
AVAG00021	537074	537103	PLE/Penelope-Athena#AthK-V	27.2	+	1
AVAG00021	568787	568817	LTR/Gypsy#Gypsy25-I_AG	9.7	-	104
AVAG00021	574859	574941	DNA/TcMar-Tigger#Tigger2_Av	24.7	-	0
AVAG00021	584060	584150	DNA/TcMar-Pogo#pogo13_Av	33	+	1
AVAG00021	590849	590960	DNA/PiggyBac#piggyBac2_Av	19.6	-	0
AVAG00021	598592	598642	LTR/Gypsy#Gypsy-176_AA-I	16	-	1
AVAG00021	626089	626159	SINE/tRNA-Core#OK	19.8	-	0
AVAG00021	628481	628541	DNA/RC#rnd-1_family-256	23.3	-	0
AVAG00021	643510	643563	DNA/TcMar-Pogo#pogo2_Av	18.5	-	35
AVAG00021	662863	662899	LTR/Gypsy#Gypsy10-I_Dpse	8.1	-	4
AVAG00021	689468	689480	LINE/I-Jockey#Jockey-3_DGri	14.6	-	0
AVAG00021	689481	689529	LINE/R1#RTAg4	14.3	-	45
AVAG00021	697324	709129	DNA/Crypton#Crypton-1_CTe	20.182	+	1020
AVAG00021	699965	700028	DNA/RC#Helitron-9_CGi	23.4	-	209
AVAG00021	699980	700024	DNA/Crypton#Crypton-1_CTe	11.4	-	202
AVAG00021	710105	710168	PLE/Penelope-Athena#AthV-L1	12.9	-	2
AVAG00021	727621	727667	DNA/hAT-Ac#rnd-5_family-2166	12.8	+	133
AVAG00021	742454	742783	DNA/TcMar-Tc1#rnd-5_family-77	31.8	+	79
AVAG00021	743130	743288	DNA/RC#Pr_Helitron1	27.1	-	0
AVAG00022	11372	11452	LINE/L2#L2-8_NVi	25.3	-	107
AVAG00022	15646	18365	DNA/Kolobok#Kolobok2_Av	0	-	4
AVAG00022	18535	18552	DNA/Ginger#Ginger1-1_AC	26.2	-	54
AVAG00022	18553	18598	DNA/CMC-Chapaev-3#Chapaev3-1_HR	19.6	+	67
AVAG00022	18561	18608	DNA/TcMar-Tc1#Mariner-19_HSal	18.8	+	70
AVAG00022	19863	19934	LINE/R2-Hero#HERO-3_HR	20.8	-	102
AVAG00022	19871	19964	DNA/RC#rnd-5_family-6308	22.5	-	101
AVAG00022	19885	19899	LTR/Gypsy#Gypsy10-I_AG	19.7	+	100
AVAG00022	19900	19943	DNA/Kolobok-T2?#Kolobok-N1_AEc	9.1	-	97
AVAG00022	20427	20500	DNA/Maverick#Polinton-1_DGr	16.4	-	117
AVAG00022	21693	21741	DNA/Maverick#Polinton-2_ACe	14.6	-	56
AVAG00022	29566	29630	DNA/P#P-1_DBp	23.1	-	2
AVAG00022	29582	29631	DNA/hAT-Charlie#hAT-11_HRo	14	-	2
AVAG00022	29593	29648	DNA/RC#Helitron-3N1_NVi	17.9	-	0
AVAG00022	86415	86450	DNA/Kolobok-T2?#Kolobok-N1_AEc	2.9	-	2
AVAG00022	107108	107210	LINE/L2#Kiri-35_AAe	20.4	+	19
AVAG00022	108083	108128	LINE/I-Jockey#TART_DV	17.4	-	54
AVAG00022	118754	118816	DNA/P#P-1_LHu	13.4	-	1
AVAG00022	152593	152680	DNA/hAT#hAT8_Av	27.9	+	294
AVAG00022	180367	180413	DNA/Kolobok-T2?#Kolobok-N1_AEc	8.5	-	7
AVAG00022	189630	189699	DNA/Sola-2#Sola2-8_LMi	24.3	-	0
AVAG00022	189772	189844	LTR/ERV1#rnd-5_family-4770	20.6	-	1
AVAG00022	204182	204306	PLE/Penelope-Athena#AthJ-W	26.2	+	4
AVAG00022	204611	204651	LINE/R1#RTAg4	19.5	-	7
AVAG00022	204620	204662	LINE/R1#RT1	11.9	-	7
AVAG00022	204663	204677	LTR/Gypsy#Gypsy-1_AC-I	19	-	7
AVAG00022	222969	223126	LTR/Unknown#ltr-1_family-4	24.8	-	0
AVAG00022	226070	226125	PLE/Penelope#Penelope-9_HRo	12.5	-	21
AVAG00022	251866	251909	DNA/TcMar-Tc1#Mariner-52_HSal	15.9	-	3
AVAG00022	251869	251926	DNA/MULE-MuDR#MuDR-1_LMi	27.6	-	3
AVAG00022	251878	251979	DNA/TcMar-Tc1#Mariner-59N1_HSal	27.7	-	3
AVAG00022	258942	259480	DNA#rnd-5_family-3897	22.613	-	26
AVAG00022	272537	272589	DNA/TcMar-Fot1#Mariner-1_DPu	20.8	+	3
AVAG00022	272668	272715	DNA/CMC-Chapaev#Chapaev-1_AA	8.5	-	15
AVAG00022	272680	272720	DNA/RC#rnd-5_family-1739	10	-	15
AVAG00022	281933	281989	DNA/Kolobok-T2#Kolobok-2_AP	16.4	-	51
AVAG00022	281942	281998	LINE/L2#L2-8_NVi	15.8	+	52
AVAG00022	286133	286274	LINE/I-Jockey#rnd-6_family-1973	17.7	-	0
AVAG00022	291282	291351	PLE/Penelope-Athena#AthW2-1	14.5	-	0
AVAG00022	292408	292599	DNA#rnd-5_family-3897	25	+	3
AVAG00022	293479	293532	PLE/Penelope-Athena#AthJ-W	15.4	-	0
AVAG00022	341121	341167	DNA/RC#Helitron-N1_LMi	15.2	-	10
AVAG00022	348087	348122	PLE/Penelope-Athena#AthW2-2	13.9	-	39
AVAG00022	352576	352638	DNA/RC#Helitron-N35_CGi	14.5	-	1
AVAG00022	370162	370198	DNA/Maverick#Polinton-1_NVi	8.1	-	150
AVAG00022	373566	373610	LTR/Gypsy#Gypsy-7_ACe-LTR	13.3	-	0
AVAG00022	392221	392270	DNA#Mariner-N29_LMi	18	+	0
AVAG00022	399003	399102	LTR/Pao#BEL-13_CGi-I	24.8	-	34
AVAG00022	407311	407364	LINE/I-Jockey#Jockey-3_DGri	13.5	+	154
AVAG00022	407325	407399	PLE/Penelope-Athena#AthL1a	18.3	+	214
AVAG00022	420008	420079	DNA/TcMar-Tc1#Mariner-52N1_HSal	24.7	-	129
AVAG00022	429462	429510	DNA/Kolobok-H#rnd-6_family-1024	10.6	+	28
AVAG00022	452430	452496	LINE/L2#L2-8_NVi	21.6	-	86
AVAG00022	486115	486175	LINE/CRE#CRE-2_HRo	17.2	+	0
AVAG00022	495018	495077	DNA/Maverick#Polinton-2_ACe	23.7	+	19
AVAG00022	495901	495943	LTR/Gypsy#Gypsy-10_DVir-LTR	11.6	+	31
AVAG00022	507165	507229	DNA/Kolobok-H#rnd-6_family-4463	24.6	+	255
AVAG00022	528239	528774	DNA/PiggyBac#rnd-5_family-335	32.326	+	0
AVAG00022	543958	544009	LINE/R1#RTAg4	23.1	+	1
AVAG00022	543978	544029	DNA/RC#rnd-5_family-6308	21.1	-	1
AVAG00022	547221	547314	PLE/Penelope-Athena#AthJ-N	17.1	+	431
AVAG00022	547800	548032	LINE/I-Jockey#TART_DV	28.8	+	536
AVAG00022	548250	548330	LINE/I-Jockey#TART_DV	19.8	+	357
AVAG00022	550736	550790	LINE/I#I-1_DEu	18.2	+	242
AVAG00022	579454	579506	PLE/Penelope-Athena#AthJ-N	15.1	+	11
AVAG00022	585881	586088	LINE/I-Jockey#TART_DV	29.5	+	385
AVAG00022	595796	595871	PLE/Penelope#Penelope-83_LMi	13.4	-	5
AVAG00022	595913	596010	LTR/Gypsy#Gypsy8-I_Dpse	31.9	-	4
AVAG00022	604489	604550	PLE/Penelope-Athena#AthX-V-T	12.9	-	15
AVAG00022	604506	604582	LTR/Gypsy#Gypsy-35_CGi-I	20.6	-	20
AVAG00022	628872	628882	LTR/Gypsy#Gypsy6-NVi_LTR	25.3	+	13
AVAG00022	628890	628952	LINE/L2#L2-8_NVi	14.7	-	13
AVAG00022	662720	662793	DNA/Maverick#Polinton-1_ACe	24.7	+	6
AVAG00022	666570	666620	PLE/Penelope-Athena#AthW	13.2	-	133
AVAG00022	669755	669790	DNA/hAT-Ac#hATN-1_HRo	5.6	+	55
AVAG00022	705042	705124	LTR/Gypsy#Gypsy-13_DBi-I	17.2	+	13
AVAG00022	710105	710154	PLE/Penelope-Athena#AthX-V-T	12.2	-	26
AVAG00022	717239	717273	LTR/Gypsy#Gypsy-52_DWil-I	11.4	+	3
AVAG00023	6	3645	LTR/Unknown#ltr-1_family-32	21.217	+	136
AVAG00023	265	373	LTR/Unknown#ltr-1_family-33	30.3	+	7
AVAG00023	957	1030	LTR/Unknown#ltr-1_family-32	17.6	+	8
AVAG00023	1186	1316	LTR/Unknown#ltr-1_family-33	23.2	+	12
AVAG00023	1562	4625	LTR/Unknown#ltr-1_family-32	27.853	+	149
AVAG00023	2521	3338	LTR/Unknown#ltr-1_family-32	27.2	+	54
AVAG00023	3907	7618	LTR/Unknown#ltr-1_family-32	19.022	+	100
AVAG00023	8009	8135	LTR/Unknown#ltr-1_family-32	30.7	+	14
AVAG00023	8747	9969	LTR/Unknown#ltr-1_family-32	23.766	+	99
AVAG00023	21238	21268	LTR/Copia#Copia-98_AA-I	9.7	+	10
AVAG00023	38232	38248	LINE/L2#Kiri-17_HMM	17.6	-	21
AVAG00023	70497	70536	LINE/L2#Daphne-13_HRo	17.5	+	106
AVAG00023	71655	71694	LINE/L2#Daphne-13_HRo	17.5	+	151
AVAG00023	89587	89697	PLE/Penelope-Athena#AthK1	4.6	+	0
AVAG00023	111196	111265	PLE/Penelope#Penelope-5_HRo	24.7	+	22
AVAG00023	111266	111351	LTR/Gypsy#Gypsy-24_DEl-I	19.8	+	17
AVAG00023	111281	111360	LINE/L2#L2-21_CTe	20.3	-	16
AVAG00023	135644	135768	LTR/Gypsy#rnd-6_family-10885	23.8	+	0
AVAG00023	160794	160892	DNA/MULE-MuDR#MULE3_Av	23.8	+	400
AVAG00023	161812	161915	PLE/Penelope#rnd-5_family-39	24.7	+	318
AVAG00023	168984	168997	DNA/hAT-Tip100#hAT-6_HRo	23.9	-	5
AVAG00023	169010	169113	LINE/L2#Kiri-13_HMM	18.6	+	5
AVAG00023	212849	212961	DNA/hAT#hAT9_Av	11.26	+	2
AVAG00023	212962	212976	DNA/RC#Heli3_Av	26.7	+	1
AVAG00023	214828	214953	LINE/Soliton#Soliton4_Av	27.6	-	71
AVAG00023	234282	234332	LINE/RTE#RTE4_Av	2	+	0
AVAG00023	241665	266402	PLE/Penelope-Athena#AthX-V-T	11.048	+	5998
AVAG00023	242322	242357	DNA/hAT#hAT4_Av	16.9	-	79
AVAG00023	266363	266401	PLE/Penelope-Athena#AthW1	15.4	+	0
AVAG00023	276553	276610	LINE/L1-Tx1#Tx1-7_CGi	17.5	+	100
AVAG00023	278125	278157	LTR/Pao#BEL-5_DMoj-I	9.1	-	4
AVAG00023	306406	306451	LTR/Gypsy#Gypsy-35_CQ-I	17.8	+	53
AVAG00023	321211	321330	PLE/Penelope-Athena#AthX-V-T	18.6	+	38
AVAG00023	349001	349086	DNA#rnd-5_family-3897	24.8	-	9
AVAG00023	349033	349098	PLE/Penelope-Athena#AthM	13.8	+	9
AVAG00023	349052	349109	DNA/Crypton#Crypton-1_CTe	14	+	8
AVAG00023	349061	349141	DNA/Sola#Sola3b_Av	25.9	+	10
AVAG00023	368945	369006	DNA/Crypton#Crypton-1_CTe	21	-	49
AVAG00023	379056	379116	LINE/Proto2#Proto2-12_CTe	17.3	+	7
AVAG00023	385525	385575	DNA/hAT-Ac#rnd-6_family-1926	10	+	0
AVAG00023	390600	390675	PLE/Penelope-Athena#AthX-V-T	20.5	+	8
AVAG00023	393601	393661	PLE/Penelope-Athena#AthW1-J-R	19.7	+	49
AVAG00023	393648	393701	DNA/Crypton#Crypton_Av	17.5	-	46
AVAG00023	404346	404397	LTR/Pao#BEL-612_AA-I	9.8	-	92
AVAG00023	406485	409469	DNA/Dada#rnd-6_family-597	21.03	+	1044
AVAG00023	443442	443531	DNA/CMC-EnSpm#EnSpm3_Av	21.5	-	5
AVAG00023	482455	482554	DNA/MULE-MuDR#MULE3_Av	15	+	0
AVAG00023	483365	483431	LINE/RTE-X#RTEX-14_CGi	25.8	-	196
AVAG00023	520512	520564	DNA/CMC-Chapaev-3#Chapaev3-2_AA	19.2	+	0
AVAG00023	548892	549049	DNA/TcMar-Tc1#rnd-5_family-3418	21.6	-	0
AVAG00023	559251	559299	DNA/Maverick#Polinton-1_DK	18.4	+	82
AVAG00023	633897	633955	PLE/Penelope#Penelope3a_Av	19	+	0
AVAG00023	638687	638751	DNA/TcMar-Tc1#MARINCE1	13.3	-	825
AVAG00023	651890	651943	LTR/Pao#BEL4-I_AG	21.2	-	105
AVAG00023	661249	661300	LTR/Gypsy#Gypsy-6_DSim-I	20.5	+	0
AVAG00023	686984	687154	DNA/hAT-Ac#rnd-6_family-1926	26.3	+	103
AVAG00023	696120	696189	DNA/IS3EU#IS3EU-N1_CGi	24.3	-	4
AVAG00023	698497	698524	PLE/Penelope-Athena#AthL3	27.4	+	35
AVAG00023	698526	698676	LINE/I-Jockey#TART_DV	24.1	+	55
AVAG00023	716072	716156	DNA/hAT-Ac#DNA8-2C_CGi	23.5	-	0
AVAG00024	1	233	LINE/L1-Tx1#Tx1_Av	0	+	0
AVAG00024	564	627	DNA/PIF-Harbinger#Harbinger1_Av	17.2	+	0
AVAG00024	2542	2586	DNA/PIF-Harbinger#rnd-5_family-455	13.3	+	0
AVAG00024	65014	65063	LTR/Pao#BEL-2_DBi-I	22	-	173
AVAG00024	70240	70296	LTR/Gypsy#Gypsy-172_AA-I	18.2	-	204
AVAG00024	70297	70317	LINE/I-Jockey#TART_DV	28.1	-	173
AVAG00024	72663	72712	PLE/Penelope-Athena#AthW2-1	14.6	-	251
AVAG00024	77418	77495	DNA/RC#rnd-5_family-6308	24.7	-	2
AVAG00024	78330	78384	DNA/P#P-1_LHu	20	+	7
AVAG00024	82860	82953	LTR/TelKA#TelKA1a_Av	21.1	+	176
AVAG00024	103566	103619	LINE/L2#CR1-8_Hmel	24.1	-	2
AVAG00024	103584	103639	DNA/PIF-Spy#ISL2EU-1_CFl	12.9	-	2
AVAG00024	107070	107206	LTR/Ngaro#rnd-6_family-5579	25.7	+	3
AVAG00024	148003	148040	LINE/L2#Daphne-35_HRo	15.8	+	3
AVAG00024	171389	171435	PLE/Penelope-Athena#AthW2-1	15.6	+	367
AVAG00024	178539	178599	DNA/hAT#hAT25_Av	16.2	+	152
AVAG00024	200904	200988	LTR/Gypsy#Gypsy-9_ACe-LTR	28.6	+	0
AVAG00024	203217	203253	DNA/TcMar-Mariner#Mariner-13_ACe	13.5	+	511
AVAG00024	238714	238831	LTR/Gypsy#rnd-5_family-1179	22.2	+	0
AVAG00024	242280	242406	DNA#DNA5-4_CGi	29.5	-	43
AVAG00024	242360	242450	DNA/PIF-Spy#ISL2EU-N1_CGi	22	-	50
AVAG00024	256170	256248	PLE/Penelope-Athena#AthW1	16.9	+	177
AVAG00024	264092	264125	DNA/hAT-Tip100#PrTip	3.1	+	44
AVAG00024	275456	275497	LINE/L2#Crack-7_AAe	14.3	+	89
AVAG00024	286386	286449	DNA/hAT-Ac#DNA8-2_CGi	13.1	-	0
AVAG00024	288995	289047	LINE/L2#L2-8_NVi	15.4	+	0
AVAG00024	292555	292626	LINE/R1#Waldo-4_AAe	24.3	-	20
AVAG00024	317254	317348	LTR/Juno-Vesta#Juno1_Av	18.6	-	243
AVAG00024	347501	347582	PLE/Penelope-Athena#AthK-V	14.5	-	7
AVAG00024	380243	380374	PLE/Penelope-Athena#AthL3	27.7	-	64
AVAG00024	392107	392174	DNA/hAT#hAT5_Av	24.7	-	32
AVAG00024	418635	418720	LINE/L2#Kiri-3_CQ	20.2	+	0
AVAG00024	428361	428397	PLE/Penelope-Athena#AthX-V-T	10.8	-	0
AVAG00024	455114	455169	LINE/L2#Crack-3_CP	18.2	+	596
AVAG00024	460873	460939	LINE/I#I-3_AC	15.4	-	7
AVAG00024	512301	512465	DNA/PiggyBac#piggyBac6_Av	17.1	+	0
AVAG00024	512458	512553	DNA/PiggyBac#piggyBac6_Av	16.3	-	0
AVAG00024	518144	518325	PLE/Penelope-Athena#AthW2-1	8.8	-	0
AVAG00024	518191	518361	PLE/Penelope-Athena#AthW-J	18.9	+	0
AVAG00024	520658	520771	PLE/Penelope#Penelope1a_Av	21.1	-	0
AVAG00024	522365	522451	DNA/PiggyBac-Uribo#Uribo1_Av	22.1	+	3
AVAG00024	523968	524025	DNA/PIF-Harbinger#rnd-5_family-455	20.1	+	0
AVAG00024	531567	531730	DNA/Dada#rnd-6_family-597	18.5	-	0
AVAG00024	533257	533367	LINE/I-Jockey#Hebe2_Av	27.5	+	1
AVAG00024	545565	545641	DNA/TcMar-Pogo#pogo5_Av	24	+	2
AVAG00024	555786	556261	DNA/TcMar-Mariner#Avmar1a_Av	13.2	+	0
AVAG00024	558324	558397	DNA/hAT#hAT1_Av	13.1	-	0
AVAG00024	558902	558936	PLE/Penelope#rnd-6_family-5747	8.6	+	0
AVAG00024	563681	563974	DNA/TcMar-Pogo#pogo8_Av	27.2	-	0
AVAG00024	578443	579407	PLE/Penelope-Athena#AthJ-W	9.2	+	0
AVAG00024	587605	587694	DNA/MULE-MuDR#rnd-1_family-39	17	+	0
AVAG00024	589307	589348	DNA/RC#Heli3_Av	14.3	+	0
AVAG00024	593117	593184	DNA/MULE-MuDR#rnd-1_family-39	13.8	-	0
AVAG00024	598135	598243	DNA/TcMar-Mariner#Avmar7_Av	22	+	0
AVAG00024	612449	612566	LINE/RTE-BovB#rnd-6_family-4823	5.1	-	0
AVAG00024	612555	613762	LINE/RTE#RTE2_Av	5	-	0
AVAG00024	613815	613854	LTR/Gypsy#Gypsy6-I_Dya	17.5	-	0
AVAG00024	615178	616194	DNA/hAT-Ac#rnd-5_family-2166	24.7	+	0
AVAG00024	617672	617804	LTR/Unknown#ltr-1_family-24	11.7	-	0
AVAG00024	617925	617971	PLE/Penelope-Athena#AthX-V-S	19.1	-	0
AVAG00024	619544	621520	PLE/Penelope-Athena#AthX-V-T	20.3	-	0
AVAG00024	622482	625701	DNA/RC#rnd-5_family-274	15.3	-	0
AVAG00024	626945	627451	LTR/Juno-Vesta#Vesta1a_Av	0.2	+	3
AVAG00024	627678	634721	DNA/RC#Helentron_Av	15.884	-	0
AVAG00024	636440	638274	DNA/MULE-MuDR#MULE4_Av	29.058	+	0
AVAG00024	639545	639597	DNA/TcMar-Tigger#Tigger2_Av	23.3	+	0
AVAG00024	640003	640102	PLE/Penelope-Athena#AthX-V-S	25.9	+	0
AVAG00024	640980	641121	DNA/Kolobok#Kolobok2_Av	25.5	+	0
AVAG00024	682392	682458	LINE/R2-R9#R9_Av	18.2	+	0
AVAG00024	686061	687369	DNA/TcMar-Tc1#Tc13_Av	28.1	+	0
AVAG00024	692661	692943	DNA/Sola#Sola2b_Av	21.734	-	1
AVAG00024	692977	693172	DNA/Sola#Sola2b_Av	16.302	-	1
AVAG00024	704657	704875	LINE/L2#rnd-5_family-1308	23.4	-	3
AVAG00024	705086	705152	LINE/Soliton#Soliton9b_Av	23.1	-	3
AVAG00024	708257	708360	PLE/Penelope-Athena#AthJ-N-W1	18.9	-	0
AVAG00024	711007	711366	PLE/Penelope-Athena#AthL2	16.6	-	0
AVAG00024	711119	712200	PLE/Penelope#rnd-5_family-3182	17.5	-	0
AVAG00024	711505	712353	PLE/Penelope-Athena#AthL1a	25	-	0
AVAG00024	715484	716320	DNA/PIF-ISL2EU#ISL2EU3_Av	27.411	+	0
AVAG00024	719151	719202	DNA/RC#Heli3a_Av	6.2	-	0
AVAG00025	6	1164	DNA/TcMar-Mariner#Avmar1_Av	7.1	+	0
AVAG00025	26209	26271	DNA/TcMar-Mariner#Mariner-39_HSal	18.3	-	20
AVAG00025	78816	78889	DNA/IS3EU#IS3EU-N1_CGi	23	-	0
AVAG00025	84664	84753	LTR/Gypsy#rnd-5_family-8925	20.2	-	0
AVAG00025	197126	197266	DNA/Maverick#Polinton-8_NVi	27	+	0
AVAG00025	198145	198197	DNA/P#P-1_LHu	17	-	0
AVAG00025	198347	198384	LINE/L2#Kiri-5_HMM	21.3	-	0
AVAG00025	198385	198469	DNA/RC#Helitron-N1_PBa	14.5	+	0
AVAG00025	225297	275805	DNA/RC#rnd-5_family-6308	18.246	+	20704
AVAG00025	247098	247177	PLE/Penelope-Athena#AthX-V-T	21.5	+	0
AVAG00025	279663	279710	LINE/L2#Kiri-1_HMM	10.4	-	1
AVAG00025	287307	287363	LTR/Gypsy#Gypsy-13_CFl-I	12.7	+	19
AVAG00025	315329	315591	DNA/Kolobok-H#rnd-6_family-4463	31.2	+	276
AVAG00025	326925	327026	DNA/RC#rnd-5_family-1739	27.2	+	555
AVAG00025	329748	329804	LTR/Gypsy#Gypsy-3_TCa-I	20	-	562
AVAG00025	331734	331851	DNA/TcMar-Mariner#rnd-5_family-605	19.1	-	0
AVAG00025	333627	333812	DNA/TcMar-Tc1#Tc20_Av	19.9	+	0
AVAG00025	364802	364850	PLE/Penelope-Athena#AthW2-2	9	-	22
AVAG00025	376496	376582	DNA/Kolobok-Hydra#Kolobok-3_Aplcal	23.8	-	1
AVAG00025	386524	386687	DNA/RC#rnd-5_family-6308	24.3	-	3
AVAG00025	411939	412009	DNA/Kolobok-T2#Kolobok-N1_PBa	21.4	+	1
AVAG00025	419273	419362	DNA/Maverick#Polinton-2_TC	28.1	+	89
AVAG00025	425740	425829	DNA/Maverick#Polinton-2_TC	28.1	+	129
AVAG00025	459776	459879	DNA/PiggyBac#piggyBac2_Av	21.1	-	0
AVAG00025	460611	460705	DNA/Sola-2#Sola2-1_LMi	25	-	0
AVAG00025	466996	467066	LTR/Gypsy#Gypsy-13_RP-I	21.4	+	266
AVAG00025	471645	471724	DNA#DNA6-9_CGi	21.1	-	64
AVAG00025	477036	477149	DNA/RC#rnd-5_family-6308	20.1	+	289
AVAG00025	490641	490696	DNA/TcMar-Tc1#Mariner-79_HSal	13.5	-	27
AVAG00025	503464	503637	LTR/Gypsy#Gypsy-24_DEl-I	26.8	+	1048
AVAG00025	516122	516220	LINE/L1-Tx1#Tx1_Av	21.3	-	2
AVAG00025	516547	516645	LINE/L1-Tx1#Tx1_Av	21.3	-	0
AVAG00025	526300	526405	DNA/RC#rnd-5_family-1739	22.2	-	49
AVAG00025	543969	544185	DNA/TcMar-Tc1#Tc21_Av	33.7	+	0
AVAG00025	544298	544424	DNA/TcMar-Tc1#rnd-1_family-77	24.4	+	0
AVAG00025	574968	575035	DNA/PiggyBac#piggyBac2_Av	25.8	+	129
AVAG00025	587867	587976	PLE/Penelope-Athena#AthL3	10.9	-	228
AVAG00025	611441	611489	DNA/Crypton#Crypton-1_CTe	12.2	-	70
AVAG00025	617235	617272	DNA/hAT-hobo#hAT-36_LMi	5.6	+	10
AVAG00025	619005	619075	DNA/TcMar-Mariner#rnd-5_family-605	15.7	-	7
AVAG00025	621463	621574	DNA/TcMar-Tc1#Tc4_Av	9.8	+	2
AVAG00025	621573	621684	DNA/TcMar-Tc1#Tc4_Av	8	-	2
AVAG00025	622149	622261	DNA/TcMar-Tc1#Tc4_Av	22.5	+	0
AVAG00025	622260	622361	DNA/TcMar-Tc1#Tc4_Av	22.6	-	0
AVAG00025	627676	627734	LINE/CR1#CR1-67_AAe	24.6	-	1713
AVAG00025	640717	640791	DNA/Sola-1#Sola1-1_AC	24	-	58
AVAG00025	640741	640809	DNA/TcMar-Tc1#Mariner-17_AEc	27.5	-	56
AVAG00025	640749	640828	DNA/hAT-Tip100#hAT-15_HRo	20	+	56
AVAG00025	647396	647480	DNA/RC#Helitron-like-11_Hmel	24.4	+	14
AVAG00025	692935	693065	LTR/Gypsy#Gypsy-35_CGi-I	20.9	-	530
AVAG00026	17620	17825	LTR/Gypsy#rnd-5_family-1179	25.8	+	13
AVAG00026	20883	20982	DNA/hAT-Ac#rnd-5_family-2166	22.4	-	0
AVAG00026	47139	47193	DNA/RC#Heli2_Av_cons	17.4	+	398
AVAG00026	91518	91589	LINE/L2#Daphne-9_CTe	15.7	-	0
AVAG00026	96137	96186	LTR/Juno-Vesta#Vesta4a_Av	16	+	3
AVAG00026	102447	102516	LINE/CR1#CR1-48_AAe	15.7	-	0
AVAG00026	116073	116151	LTR/Gypsy#Gypsy-52_DEl-I	23.4	+	3
AVAG00026	163240	163259	LINE/L2#L2-8_NVi	19.7	+	31
AVAG00026	170539	170867	LTR/Unknown#ltr-1_family-12	22.962	+	146
AVAG00026	191255	191351	DNA/Maverick#Polinton-3_LMi	25.4	-	134
AVAG00026	191258	191364	DNA/RC#rnd-5_family-6308	29.8	+	133
AVAG00026	224964	225218	LINE/I-Jockey#TART_DV	22.9	-	58
AVAG00026	243569	243614	LTR/Gypsy#Gypsy-4_CQ-I	13.7	+	44
AVAG00026	259649	259695	LTR/Gypsy#ltr-1_family-31	14.9	-	89
AVAG00026	266823	266929	PLE/Penelope-Athena#AthW1-J-R	18.4	-	68
AVAG00026	279153	279222	PLE/Penelope-Athena#AthW	15.2	+	0
AVAG00026	296746	296786	LTR/Copia#Copia-15_SI-I	15	+	0
AVAG00026	313625	313636	DNA/TcMar-Tc4#Mariner3-4_LMi	23.5	-	0
AVAG00026	321781	321819	LTR/ERV1#rnd-5_family-4770	10.3	+	1
AVAG00026	327318	327426	DNA/Kolobok-H#rnd-6_family-4463	25	+	35
AVAG00026	328862	329803	DNA/Merlin#Merlin1_Av	25.4	-	2
AVAG00026	330362	330510	DNA/Merlin#Merlin1_Av	26.1	+	7
AVAG00026	368808	368916	LTR/Gypsy#Gypsy61-I_AG	27.5	+	2
AVAG00026	384943	384983	DNA/Maverick#Polinton-1_DAn	8	+	922
AVAG00026	422064	422530	DNA/RC#rnd-5_family-6308	26.699	-	314
AVAG00026	426806	427277	DNA/RC#rnd-5_family-6308	28.1	-	194
AVAG00026	428092	428380	DNA/RC#rnd-5_family-6308	27.86	-	122
AVAG00026	432774	433245	DNA/RC#rnd-5_family-6308	28.478	-	78
AVAG00026	456403	456432	LINE/I-Jockey#Jockey-1_DRh	6.7	+	0
AVAG00026	457883	458445	LTR/Ngaro#rnd-6_family-5248	11.8	+	12
AVAG00026	458817	474001	LTR/Ngaro#rnd-6_family-5248	7.9	+	1630
AVAG00026	517542	517612	DNA/Crypton#Crypton-1_CTe	15.2	+	88
AVAG00026	517554	517634	DNA/Maverick#Polinton-1_ACe	16.9	-	112
AVAG00026	528528	528561	DNA/Maverick#Polinton-2_ACe	9.1	-	84
AVAG00026	605662	605716	DNA#DNA-11_CGi	14.8	-	0
AVAG00026	607072	607136	LTR/Pao#BEL-21_DWil-I	17.4	+	0
AVAG00026	622279	622344	DNA/PIF-Harbinger#rnd-6_family-3339	13.8	+	25
AVAG00026	629233	629283	LINE/RTE#RTE4_Av	15.7	-	0
AVAG00026	630105	630229	DNA/TcMar-Tc1#rnd-5_family-77	25.2	-	0
AVAG00026	635130	635170	DNA/PIF-Harbinger#rnd-5_family-455	4.9	-	0
AVAG00026	638396	638451	LTR/Copia#Copia1-NVi_I	18.6	+	0
AVAG00026	683925	684016	LINE/L2#Kiri-17_HMM	21.1	-	0
AVAG00026	684010	684142	DNA/TcMar-Tc4#Mariner3-4_LMi	27.3	+	0
AVAG00026	694591	694642	DNA/Merlin#Merlin-1_Aplcal	13.7	+	11
AVAG00026	696169	696287	LINE/L1-Tx1#Tx1-11_CGi	10.3	+	4
AVAG00027	12124	12185	DNA/Zator#Zator1_Av	24.2	+	144
AVAG00027	24765	24893	DNA/TcMar-Tigger#Tigger2_Av	31.7	+	1
AVAG00027	35674	35722	LTR/Gypsy#Gypsy-55_CGi-I	13.1	+	530
AVAG00027	35675	35741	DNA/RC#Helitron-9_CGi	18.7	+	580
AVAG00027	45310	45379	DNA/hAT-Ac#Homo10	16.7	-	4
AVAG00027	83992	84057	PLE/Penelope#Penelope-83_LMi	21.5	-	1
AVAG00027	89874	89910	DNA/RC#rnd-5_family-1739	8.3	-	55
AVAG00027	102704	102718	DNA/Maverick#Polinton-4_PBa	16.4	+	119
AVAG00027	104682	104743	LINE/I-Jockey#Jockey-4_DPer	17	+	95
AVAG00027	119013	119078	DNA/hAT-Blackjack#hAT-16N2_LMi	23.4	-	0
AVAG00027	120950	120988	LINE/L2#CR1-1_AG	15.4	+	11
AVAG00027	124057	125347	DNA#rnd-5_family-3897	21.951	-	62
AVAG00027	127136	127204	LTR/Gypsy#Gypsy6-NVi_LTR	23.2	-	0
AVAG00027	162040	162134	DNA/Kolobok-H#rnd-6_family-1024	21.5	-	73
AVAG00027	166116	166161	LTR/Copia#Copia-2_DPu-I	15.2	+	267
AVAG00027	172765	172853	LTR/Gypsy#Gypsy-9_PPc-I	18.7	+	153
AVAG00027	181197	181234	LTR/Gypsy#Stalker2_I	7.9	-	53
AVAG00027	184014	184229	LTR/Unknown#ltr-1_family-4	25	+	20
AVAG00027	199935	200028	LTR/Ngaro#rnd-5_family-8138	18.7	+	6
AVAG00027	209363	209408	LTR/Copia#Copia-20_DPu-I	21.7	+	78
AVAG00027	229399	229491	DNA/Maverick#Polinton-9_NVi	24.7	+	60
AVAG00027	237445	237663	DNA/RC#rnd-5_family-6308	23.1	+	116
AVAG00027	250248	250299	PLE/Penelope#Penelope-83_LMi	19.2	-	0
AVAG00027	255260	255301	LTR/Gypsy#Gypsy-40_CGi-I	16.7	+	9
AVAG00027	278677	278748	DNA/Maverick#Polinton-9_NVi	28.2	+	4
AVAG00027	284337	284390	LTR/Gypsy#ltr-1_family-38	22.2	-	47
AVAG00027	305306	305404	DNA/TcMar-Tc1#Tc22_Av	27.6	-	0
AVAG00027	319146	319187	LTR/Gypsy#Gypsy-31_SI-I	19.1	+	95
AVAG00027	319356	319438	LTR/Gypsy#Gypsy-615_AA-I	27.3	+	466
AVAG00027	327963	328018	DNA/hAT-hobo#Howilli2	13.2	+	45
AVAG00027	350065	351885	DNA/Ginger#Ginger2a_Av	0.4	-	1623
AVAG00027	383017	383157	LTR/Gypsy#Gypsy61-I_AG	29	+	278
AVAG00027	383173	383206	LTR/ERV1#rnd-5_family-4770	25.7	-	256
AVAG00027	384245	384300	LINE/R1#RTAg4	16.1	-	209
AVAG00027	392338	392406	PLE/Penelope-Athena#AthJ-N	19.7	+	239
AVAG00027	414021	414061	LINE/R1#RTAg4	9.8	+	50
AVAG00027	414028	414071	LTR/Gypsy#Gypsy-1_AC-I	15.9	+	52
AVAG00027	450437	450549	DNA/Kolobok-Hydra#Kolobok-3_Aplcal	21.4	+	9
AVAG00027	458521	458572	LTR/Pao#rnd-5_family-4074	27.6	-	71
AVAG00027	489602	489675	LTR/Gypsy#Gypsy-29_DWil-I	22.6	-	139
AVAG00027	499113	499170	DNA/P#P7_Av	18.2	+	0
AVAG00027	501159	501208	LINE/L2#Kiri-13_HMM	16	+	1
AVAG00027	533828	533882	DNA/Kolobok-H#rnd-6_family-1024	17	+	1
AVAG00027	537482	537512	DNA/RC#Heli3_Av	27	+	0
AVAG00027	569318	569368	DNA/Zator#Zator-3_CGi	10	-	1
AVAG00027	585130	585248	LTR/Gypsy#Gypsy-21_LG-I	20	+	339
AVAG00027	623493	623922	DNA#rnd-5_family-3897	28.895	-	83
AVAG00027	630682	630918	DNA/RC#Heli1_Av	17.8	-	0
AVAG00027	633479	633588	DNA/RC#Pr_Helitron1	25.8	-	0
AVAG00027	634707	634770	LTR/Gypsy#Gypsy-32_SI-I	19	-	0
AVAG00027	640661	642610	PLE/Penelope#Penelope5a_Av	25.9	-	2
AVAG00027	646062	647483	DNA/MULE-MuDR#MULE2_Av	3.6	-	0
AVAG00027	647650	647934	PLE/Penelope#Penelope5a_Av	21.8	-	0
AVAG00027	674575	674655	DNA/Zator#Zator-2_AA	19.2	+	56
AVAG00027	675566	675654	DNA/PIF-ISL2EU#ISL2EU2_Av	27	+	4
AVAG00027	681598	681664	DNA/hAT-Ac#DNA8-20_AP	14.3	-	0
AVAG00027	684378	684470	DNA/hAT#hAT4_Av	22.6	+	0
AVAG00027	690314	690661	DNA/Kolobok#Kolobok2_Av	0	-	2
AVAG00028	24043	24601	DNA/Kolobok-H#rnd-6_family-1024	29	+	0
AVAG00028	34373	34447	LTR/Ngaro#rnd-5_family-8138	17.6	+	0
AVAG00028	60215	60275	LINE/R2-NeSL#NeSL-2_CRem	13.6	-	13
AVAG00028	62248	62300	DNA/hAT-Tip100#rnd-6_family-1597	17.3	+	2
AVAG00028	127185	127243	LINE/L2#L2-26_HRo	21.1	+	6
AVAG00028	192364	192589	DNA/RC#rnd-5_family-6308	24.868	-	18
AVAG00028	208771	208817	LTR/Gypsy#Gypsy-11_CGi-I	17.4	+	0
AVAG00028	220386	220497	DNA/TcMar-Tc1#Tc2_Av	24.1	+	0
AVAG00028	221890	221931	DNA/RC#Heli3_Av	14.3	+	0
AVAG00028	230902	231233	DNA/MULE-MuDR#MuDR2_Av	7.8	+	1
AVAG00028	268909	268954	LINE/I#Nimb-2_AAe	19.6	+	0
AVAG00028	269351	269437	PLE/Penelope#Penelope5_Av	24.8	-	0
AVAG00028	327370	327478	DNA/CMC-EnSpm#EnSpm-2_SIn	21.9	+	2
AVAG00028	366969	367037	DNA/hAT#hAT30_Av	17.9	-	0
AVAG00028	379707	379803	LTR/Pao#BEL-2_DBp-I	22.8	-	14
AVAG00028	390506	390570	PLE/Penelope-Athena#AthK-V	7.1	+	6
AVAG00028	436242	436285	LINE/RTE#RTE1_Av	6.8	+	5
AVAG00028	461256	461323	LINE/I-Jockey#Jockey-6_DK	20.6	-	0
AVAG00028	461267	461746	LINE/R1#RTAg4	29.7	-	0
[truncated: 23,850 more rows]

## Sheet: Rd_10x_p
Rd10x_p_00001	1473	1506	LTR/Gypsy#Gypsy-592_AA-LTR	14.7	-	0
Rd10x_p_00001	30764	30854	LINE/I-Jockey#TART_DV	21.1	+	0
Rd10x_p_00001	121036	121121	LTR/Gypsy#Gypsy-71_CGi-I	25.1	-	0
Rd10x_p_00001	121830	122122	LTR/Pao#BEL-30_CQ-I	29.9	-	0
Rd10x_p_00001	166215	166279	DNA/RC#Helentron_Av	21.8	-	0
Rd10x_p_00001	195184	195243	DNA/hAT#hAT3a_Av	8.3	+	0
Rd10x_p_00001	220825	220902	LTR/Gypsy#Gypsy-27_DP-I	19.6	+	0
Rd10x_p_00001	346970	347062	LINE/R1#MinoAg1	22	+	0
Rd10x_p_00001	525441	525511	LTR/Gypsy#Gypsy8-I_Dpse	31	+	0
Rd10x_p_00001	567832	567886	LTR/Copia#Copia-4_DGri-I	23.6	-	0
Rd10x_p_00001	594985	595049	LTR/Gypsy#Gypsy-90_AA-I	21.4	+	0
Rd10x_p_00001	603725	603774	LTR/Juno-Vesta#Vesta3_Av	20.4	+	0
Rd10x_p_00001	746700	746784	LTR/Gypsy#Gypsy-3_TCa-I	25.6	-	0
Rd10x_p_00001	772338	772411	LTR/Pao#BEL-27_CQ-I	27.4	-	0
Rd10x_p_00001	830132	830204	LINE/I-Jockey#Ag-Jock-1	26	-	0
Rd10x_p_00001	968883	969026	DNA/TcMar-Tc1#rnd-5_family-4789	12.6	+	31
Rd10x_p_00001	971034	971154	DNA/TcMar-Tc1#rnd-1_family-559	26.7	+	31
Rd10x_p_00001	985621	985692	DNA/TcMar-Tc1#Mariner-18_HSal	20.3	-	25
Rd10x_p_00001	997133	997249	LINE/Soliton#Soliton7_Av	39.3	+	0
Rd10x_p_00001	1014323	1015321	DNA/MULE-MuDR#rnd-3_family-112	14.161	+	0
Rd10x_p_00001	1057788	1057837	DNA/hAT#hAT31_Av	20	+	0
Rd10x_p_00001	1058009	1058066	LINE/L2#Crack-3_CQ	24.1	-	0
Rd10x_p_00001	1063255	1063350	LINE/RTE-BovB#rnd-6_family-5002	17.7	-	0
Rd10x_p_00001	1084157	1084225	PLE/Penelope-Athena#AthL1a	17.6	+	14
Rd10x_p_00001	1090090	1091001	DNA/hAT-hobo#rnd-5_family-389	13.687	+	0
Rd10x_p_00001	1104013	1104048	LINE/I#Ag-Loner-1	8.3	+	13
Rd10x_p_00001	1106644	1106736	LTR/Gypsy#Gypsy-1_AC-I	31.9	-	22
Rd10x_p_00001	1110480	1110521	PLE/Penelope-Athena#AthQ	16.7	-	55
Rd10x_p_00001	1115010	1115097	DNA/RC#Helitron-3N1_NVi	16.2	-	4
Rd10x_p_00001	1115027	1115110	LTR/Gypsy#Gypsy10-I_AG	20.2	-	3
Rd10x_p_00001	1141726	1141845	DNA/PiggyBac#piggyBac2_Av	22.5	+	0
Rd10x_p_00001	1145080	1145741	DNA/TcMar-Mariner#Avmar7_Av	25.1	-	0
Rd10x_p_00001	1146789	1146922	LTR/Unknown#ltr-1_family-5	24.2	+	0
Rd10x_p_00001	1149728	1149864	DNA/TcMar-Tc1#Tc3_Av	25.4	+	0
Rd10x_p_00001	1150987	1151271	DNA/TcMar-Mariner#rnd-6_family-7637	18.6	-	0
Rd10x_p_00001	1162535	1163128	DNA/hAT-Ac#rnd-5_family-5936	14	+	1
Rd10x_p_00001	1164100	1164525	DNA/MULE-MuDR#rnd-6_family-544	15.039	-	0
Rd10x_p_00001	1166388	1166524	DNA/Sola#Sola2h_Av	30.8	+	1
Rd10x_p_00001	1167156	1167219	DNA/PiggyBac#rnd-6_family-4296	26.6	+	1
Rd10x_p_00001	1168287	1168569	DNA/PiggyBac#rnd-6_family-4296	12.7	+	1
Rd10x_p_00001	1168577	1169461	DNA/Sola-2#rnd-6_family-13845	23.189	+	1
Rd10x_p_00001	1177752	1177821	DNA/P#rnd-1_family-56	27.1	+	3
Rd10x_p_00001	1180524	1181065	DNA/MULE-MuDR#rnd-3_family-112	24	-	4
Rd10x_p_00001	1182467	1182585	DNA/TcMar-Tc1#rnd-5_family-337	16.2	+	5
Rd10x_p_00001	1198109	1199083	DNA/TcMar-Tc1#rnd-1_family-218	28.046	-	2
Rd10x_p_00001	1201159	1201233	LTR/Copia#Copia-25_SI-I	25	+	0
Rd10x_p_00001	1213191	1213244	LINE/L2#L2-8_NVi	16.7	+	11
Rd10x_p_00001	1217819	1218341	DNA/PiggyBac#rnd-4_family-328	12.721	-	0
Rd10x_p_00001	1218342	1218440	DNA/PiggyBac-PB#AvPB2	27.3	-	0
Rd10x_p_00001	1226224	1226335	DNA/hAT-Tip100#rnd-6_family-53	21.2	+	0
Rd10x_p_00001	1230524	1231057	DNA/MULE-MuDR#rnd-6_family-6074	25.5	-	3
Rd10x_p_00001	1234859	1234909	LTR/Gypsy#Gypsy-28_DBp-I	20	-	3
Rd10x_p_00001	1243787	1244133	DNA/TcMar-Tc1#Tc19_Av	26.7	+	47
Rd10x_p_00001	1245456	1245567	DNA/TcMar-Tc1#Tc1_Av	23.4	-	47
Rd10x_p_00001	1269041	1269110	DNA/TcMar-Mariner#Mariner-9_SIn	28.6	-	0
Rd10x_p_00001	1269479	1270046	DNA/TcMar-Mariner#rnd-5_family-4115	27.5	-	2
Rd10x_p_00001	1272103	1272153	DNA/hAT-Tip100#hAT-15_HRo	17.6	-	0
Rd10x_p_00001	1280815	1281115	DNA/TcMar-Tc1#Tc19_Av	22.8	-	4
Rd10x_p_00001	1285318	1285383	DNA/hAT-Ac#rnd-6_family-6382	21.5	-	0
Rd10x_p_00001	1290189	1290391	DNA/TcMar-Mariner#rnd-6_family-7637	20	+	7
Rd10x_p_00001	1298987	1299151	DNA/TcMar-Tc1#rnd-3_family-532	33.5	+	89
Rd10x_p_00001	1299268	1299495	DNA/PiggyBac#rnd-6_family-2495	27.9	-	89
Rd10x_p_00001	1316310	1316352	LINE/L2#L2-8_NVi	13.9	-	29
Rd10x_p_00001	1316317	1316368	LTR/Gypsy#Gypsy7-I_Dya	23.1	+	29
Rd10x_p_00001	1322601	1323310	DNA/hAT#hAT24_Av	30.428	+	0
Rd10x_p_00001	1330227	1332075	DNA/Ginger-1#rnd-6_family-948	19.79	-	8
Rd10x_p_00001	1332160	1332251	LINE/RTE-BovB#rnd-5_family-1777	26.2	+	12
Rd10x_p_00001	1338205	1338357	DNA/CMC-EnSpm#EnSpm5_Av	27.1	+	6
Rd10x_p_00001	1338388	1338537	DNA/TcMar-Tc1#rnd-1_family-508	20.7	-	5
Rd10x_p_00001	1343405	1344024	DNA/TcMar-Mariner#rnd-5_family-4115	23.826	+	11
Rd10x_p_00001	1345823	1345902	DNA/PiggyBac#piggyBac2_Av	23.8	+	5
Rd10x_p_00001	1361172	1361301	DNA/Ginger#Ginger2_Av	35.2	-	0
Rd10x_p_00001	1364768	1365080	LTR/Pao#rnd-1_family-841	11.3	-	2117
Rd10x_p_00001	1365135	1365541	LTR/Pao#rnd-1_family-841	11.5	-	3595
Rd10x_p_00001	1371500	1371721	DNA/hAT-hobo#rnd-1_family-408	15.8	+	49
Rd10x_p_00001	1374762	1374902	DNA/P#rnd-1_family-56	26.5	-	2
Rd10x_p_00001	1384816	1385619	DNA/TcMar-Tc1#rnd-1_family-218	23.974	+	19
Rd10x_p_00001	1391830	1392298	DNA/hAT-Ac#rnd-5_family-904	22.366	+	20
Rd10x_p_00001	1393670	1395174	DNA/TcMar-Mariner#rnd-4_family-2342	21.859	-	17
Rd10x_p_00001	1413658	1414135	PLE/Penelope#rnd-5_family-2837	22.3	-	8
Rd10x_p_00001	1428354	1428443	DNA/PiggyBac#piggyBac2_Av	30.3	+	45
Rd10x_p_00001	1431064	1431146	DNA/hAT-Tip100#rnd-5_family-4237	25.3	-	1
Rd10x_p_00001	1440051	1440104	LTR/Gypsy#Gypsy-27_LSal-LTR	18.9	+	1
Rd10x_p_00001	1440199	1443703	LINE#rnd-5_family-3949	14.663	+	1
Rd10x_p_00001	1448529	1448589	PLE/Penelope-Athena#AthV-L1	15	+	8
Rd10x_p_00001	1449886	1449951	LTR/Gypsy#Gypsy7-I_Dya	20	+	34
Rd10x_p_00001	1449893	1449957	LINE/L2#L2-8_NVi	21.5	-	34
Rd10x_p_00001	1459776	1459857	LTR/Gypsy#Gypsy-30_DWil-I	18.7	+	40
Rd10x_p_00001	1476791	1477073	DNA/Ginger#Ginger2_Av	29.7	-	1
Rd10x_p_00001	1483865	1483910	DNA/CMC-EnSpm#EnSpm3_Av	17.4	-	9
Rd10x_p_00001	1489755	1490641	DNA/TcMar-Tc1#rnd-5_family-9292	16.803	+	2
Rd10x_p_00001	1494867	1494958	LTR/Gypsy#rnd-6_family-4718	20.1	+	0
Rd10x_p_00001	1520406	1520446	DNA#DNA4-4_CGi	14.6	-	16
Rd10x_p_00001	1521163	1521258	DNA/Kolobok-Hydra#rnd-5_family-3782	24.2	+	8
Rd10x_p_00001	1523277	1523529	DNA/TcMar-Tc1#Tc14_Av	35.2	-	16
Rd10x_p_00001	1525870	1526026	LTR/Gypsy#Gypsy61-I_AG	24	+	70
Rd10x_p_00001	1530572	1530582	LTR/Gypsy#Gypsy-22_DWil-I	19.2	+	76
Rd10x_p_00001	1530583	1530623	LINE/L2#L2-8_NVi	9.8	-	79
Rd10x_p_00001	1539141	1539270	DNA/TcMar-Tc1#PrD37D	27.8	-	28
Rd10x_p_00001	1539319	1539538	DNA/TcMar-Tc1#rnd-5_family-338	19.48	+	31
Rd10x_p_00001	1556979	1557013	LTR/Gypsy#Gypsy-22_DWil-I	8.6	-	75
Rd10x_p_00001	1557275	1557340	DNA/hAT-Ac#DNA8-2C_CGi	19.7	+	84
Rd10x_p_00001	1568727	1569231	PLE/Penelope#rnd-5_family-2837	17.1	-	3
Rd10x_p_00001	1579299	1579461	DNA/TcMar-Tc1#rnd-6_family-6000	30.7	-	0
Rd10x_p_00001	1579430	1579564	DNA/TcMar-Tc4#rnd-6_family-4666	26	+	0
Rd10x_p_00001	1661166	1662292	DNA/hAT-hobo#rnd-6_family-5952	9.231	+	0
Rd10x_p_00001	1684164	1684204	DNA/TcMar-Tc1#rnd-6_family-6000	30.9	-	1
Rd10x_p_00001	1684381	1684561	DNA/TcMar-Tc4#rnd-6_family-4666	32.2	-	1
Rd10x_p_00001	1684562	1684656	DNA/TcMar-Tc1#rnd-6_family-6000	28.9	+	1
Rd10x_p_00001	1689264	1689334	DNA#DNA6-9_CGi	18.3	+	1
Rd10x_p_00001	1700142	1700350	DNA/PIF-Harbinger#Harbinger3_Av	32	+	5
Rd10x_p_00001	1700154	1700329	DNA/PIF-ISL2EU#rnd-1_family-827	26.9	+	5
Rd10x_p_00001	1746301	1746550	DNA/TcMar-Tc1#rnd-1_family-508	14.7	+	9
Rd10x_p_00001	1765393	1765436	DNA/hAT-Charlie#hAT-11_HRo	15.9	+	0
Rd10x_p_00001	1772165	1772570	LTR/Unknown#ltr-1_family-24	26.6	-	0
Rd10x_p_00001	1780384	1780421	PLE/Penelope-Athena#AthP1	10.5	-	6
Rd10x_p_00001	1805170	1805243	DNA/Maverick#Polinton-1_DK	20.1	+	48
Rd10x_p_00001	1807100	1807178	DNA/P#P-1_LHu	22.8	-	16
Rd10x_p_00001	1807129	1807192	LTR/Copia#Copia-65_AA-I	20.6	+	14
Rd10x_p_00001	1816692	1816840	DNA/TcMar-Mariner#rnd-1_family-446	17.8	+	0
Rd10x_p_00001	1816869	1817119	DNA/TcMar-Mariner#rnd-1_family-446	25.6	-	0
Rd10x_p_00001	1832583	1832860	DNA/Ginger-1#rnd-6_family-948	19.6	-	0
Rd10x_p_00001	1832808	1833065	LINE/RTE-BovB#rnd-5_family-1777	25.1	+	0
Rd10x_p_00001	1834717	1834813	DNA/Sola#Sola3b_Av	26	+	0
Rd10x_p_00001	1853461	1853630	DNA/hAT-hobo#rnd-5_family-389	17.6	-	41
Rd10x_p_00001	1855343	1855387	DNA/RC#Helitron-N2d_CGi	13.6	-	17
Rd10x_p_00001	1871141	1871190	DNA/TcMar-Tc1#Mariner-69_HSal	26	+	0
Rd10x_p_00001	1872704	1872854	LTR/Unknown#ltr-1_family-10	21.2	+	0
Rd10x_p_00001	1872855	1872875	LTR/Unknown#ltr-1_family-20	24.4	-	0
Rd10x_p_00001	1917098	1917149	LINE/I-Jockey#Jockey-2_DPer	16.8	-	0
Rd10x_p_00001	1919830	1919984	PLE/Penelope#rnd-6_family-4623	29.8	-	0
Rd10x_p_00001	1921225	1921284	LTR/Pao#BEL-18_DWil-I	18.6	-	0
Rd10x_p_00001	1933954	1934052	DNA/RC#rnd-5_family-12029	24.5	-	0
Rd10x_p_00001	1934443	1934501	DNA/RC#rnd-5_family-12029	18.6	+	0
Rd10x_p_00001	1934990	1935039	DNA#DNA8-12_CB	16	-	0
Rd10x_p_00001	1943424	1943759	DNA/TcMar-Tc1#rnd-3_family-532	29.8	-	0
Rd10x_p_00001	1949549	1950875	LINE#rnd-5_family-3949	17.452	+	12
Rd10x_p_00001	1963485	1963539	PLE/Penelope-Athena#AthW2-2	21.8	+	24
Rd10x_p_00001	1973440	1973474	DNA/Maverick#Polinton-2_ACe	8.6	-	2
Rd10x_p_00001	1978004	1978934	DNA/MULE-MuDR#rnd-3_family-112	19.126	-	11
Rd10x_p_00001	1999136	1999477	DNA/TcMar-Tc1#Tc19_Av	25.4	+	1
Rd10x_p_00001	2008689	2008735	LTR/Pao#CER7-I_CE	14.9	+	9
Rd10x_p_00001	2017636	2018128	DNA/TcMar-Mariner#Avmar7_Av	24.8	-	0
Rd10x_p_00001	2018344	2018462	DNA/PiggyBac-Pokey#Pokey3_Av	25.2	-	0
Rd10x_p_00001	2021075	2021162	LTR/Gypsy#Gypsy-63_CQ-I	19.4	+	22
Rd10x_p_00001	2027562	2027904	DNA/PiggyBac#rnd-6_family-2495	21.175	-	14
Rd10x_p_00001	2031208	2031354	DNA/TcMar-Tc1#rnd-5_family-4789	13.4	+	22
Rd10x_p_00001	2031367	2031727	DNA/TcMar-Tc1#Tc12_Av	33.9	+	22
Rd10x_p_00001	2031622	2031881	DNA/TcMar-Tc1#rnd-5_family-4789	19.1	-	22
Rd10x_p_00001	2064228	2064328	DNA/Sola#Sola3b_Av	16.8	-	18
Rd10x_p_00001	2064289	2064342	DNA/Crypton#Crypton-1_CTe	18.9	-	12
Rd10x_p_00001	2092689	2092744	DNA/hAT-Tip100#hAT-6_HRo	20	-	3
Rd10x_p_00001	2092709	2092767	DNA/hAT-Tip100#hAT-6_HRo	21.5	+	3
Rd10x_p_00001	2098042	2098511	LTR/TelKA#TelKA4_Av	30.266	-	0
Rd10x_p_00001	2104666	2104686	PLE/Penelope#Penelope-6_HRo	15.6	+	1
Rd10x_p_00001	2104687	2104755	DNA/P#P-1_LHu	8.7	-	2
Rd10x_p_00001	2104689	2104771	LTR/Gypsy#Gypsy6-NVi_LTR	14.6	-	2
Rd10x_p_00001	2115949	2116036	LINE/L2#L2-8_NVi	17.1	+	1
Rd10x_p_00001	2116338	2116388	LTR/Gypsy#Gypsy68-I_AG	19.6	+	0
Rd10x_p_00001	2116347	2116391	LINE/L2#Kiri-13_HMM	15.6	+	0
Rd10x_p_00001	2119119	2119196	LTR/Copia#Copia-65_AA-I	15.1	+	3
Rd10x_p_00001	2132691	2132771	DNA/PIF-Harbinger#Harbinger1_Av	15.3	+	16
Rd10x_p_00001	2142910	2142926	DNA/MULE-MuDR#MuDR13_Av	17.1	+	0
Rd10x_p_00001	2142927	2142998	DNA/MULE-MuDR#rnd-6_family-9445	14.2	-	0
Rd10x_p_00001	2143478	2143633	DNA/MULE-MuDR#MuDR13_Av	20	-	0
Rd10x_p_00001	2147762	2148839	DNA/MULE-MuDR#rnd-3_family-112	20.52	-	45
Rd10x_p_00001	2157926	2158144	DNA/hAT-hobo#rnd-1_family-408	14.2	+	6
Rd10x_p_00001	2208169	2208381	DNA/hAT-hobo#rnd-1_family-408	12.2	-	0
Rd10x_p_00001	2233069	2233271	DNA/PiggyBac#rnd-6_family-2495	23.4	+	0
Rd10x_p_00001	2246120	2246340	DNA/hAT-hobo#rnd-1_family-408	16.9	-	6
Rd10x_p_00001	2264516	2264572	DNA/Kolobok-T2?#Kolobok-N1_AEc	14.3	-	36
Rd10x_p_00001	2271978	2272017	LINE/L2#Daphne-58_LMi	7.9	+	4
Rd10x_p_00001	2276460	2276499	DNA/hAT-Tip100#hAT-15_HRo	5	+	0
Rd10x_p_00001	2276465	2276504	LINE/L2#L2-8_NVi	1.9	-	0
Rd10x_p_00001	2276980	2277253	DNA/TcMar-Tc1#rnd-4_family-459	31.2	+	0
Rd10x_p_00001	2289059	2289136	DNA/RC#HelitronY1_CE	18	+	3
Rd10x_p_00001	2298502	2298519	DNA/TcMar-Tc1#rnd-3_family-532	26.3	-	0
Rd10x_p_00001	2299398	2299547	DNA/TcMar-Tc1#rnd-3_family-532	36	+	0
Rd10x_p_00001	2309107	2309583	DNA/MULE-MuDR#rnd-6_family-157	14.6	+	1
Rd10x_p_00001	2311344	2311640	DNA/hAT-hobo#rnd-6_family-5952	32.5	-	0
Rd10x_p_00001	2313293	2313945	DNA/MULE-MuDR#rnd-3_family-112	29.1	-	2
Rd10x_p_00001	2318903	2319028	DNA/CMC-EnSpm#EnSpm5_Av	26.3	-	0
Rd10x_p_00001	2319362	2319655	DNA/TcMar-Tc1#Tc19_Av	22.5	-	0
Rd10x_p_00001	2323076	2323224	LINE/L2#Daphne-7_CTe	23.9	+	3
Rd10x_p_00001	2323825	2323887	LTR/Gypsy#Gypsy-35_CGi-I	22.9	-	427
Rd10x_p_00001	2327024	2327424	DNA#rnd-5_family-172	16.8	+	23
Rd10x_p_00001	2327425	2328198	DNA/TcMar-Mariner#Avmar5_Av	30.2	+	23
Rd10x_p_00001	2328289	2329310	DNA/hAT-Ac#rnd-5_family-5936	15.854	+	23
Rd10x_p_00001	2331589	2331728	DNA/TcMar-Tc1#rnd-3_family-532	8.8	-	0
Rd10x_p_00001	2333285	2334414	DNA/TcMar-Tc1#rnd-3_family-532	16.367	+	1
Rd10x_p_00001	2365145	2365217	LTR/Gypsy#Gypsy68-I_AG	16.9	+	0
Rd10x_p_00001	2365159	2365253	DNA/RC#Helitron-N1_PBa	16.5	-	0
Rd10x_p_00001	2365218	2365252	DNA/hAT-Blackjack#hAT-4_PBa	22	+	0
Rd10x_p_00001	2378786	2378830	PLE/Penelope-Athena#AthX-V-T	13.3	+	3
Rd10x_p_00001	2380830	2380898	DNA/P#P2_Av	19.4	+	26
Rd10x_p_00001	2386420	2386914	DNA/TcMar-Tc2#rnd-6_family-1946	16.015	+	1
Rd10x_p_00001	2393149	2393294	DNA/PiggyBac#rnd-6_family-4296	26.7	+	19
Rd10x_p_00001	2397080	2397267	DNA/hAT-hobo#rnd-1_family-408	14	-	9
Rd10x_p_00001	2407344	2407401	PLE/Penelope-Athena#AthW2-2	20.7	+	10
Rd10x_p_00001	2407353	2407423	PLE/Penelope-Athena#AthX-V-T	9.3	-	10
Rd10x_p_00001	2469579	2469706	DNA/TcMar-Tc1#rnd-3_family-532	23.6	+	0
Rd10x_p_00001	2492063	2493708	DNA/TcMar-Tc1#rnd-3_family-532	15.781	-	24
Rd10x_p_00001	2501934	2501989	DNA/CMC-EnSpm#CACTA2_Av	26.8	-	1
Rd10x_p_00001	2505504	2505631	DNA/TcMar-Tc1#rnd-5_family-2772	25.4	+	0
Rd10x_p_00001	2505632	2505868	DNA/MULE-MuDR#rnd-4_family-2201	17.1	-	1
Rd10x_p_00001	2510799	2511026	DNA/hAT#hAT9_Av	23	+	31
Rd10x_p_00001	2517690	2517895	DNA/hAT-hobo#rnd-1_family-408	14.2	+	513
Rd10x_p_00001	2518003	2518039	DNA/hAT#hAT9_Av	16.2	-	514
Rd10x_p_00001	2520968	2521529	DNA/TcMar-Tc2#rnd-6_family-1946	14.728	-	18
Rd10x_p_00001	2535624	2535706	DNA#DNA2-10_CGi	18.3	+	63
Rd10x_p_00001	2546921	2547054	DNA/TcMar-Tc1#Tc19_Av	18.7	+	0
Rd10x_p_00001	2548472	2548534	LTR/Gypsy#Gypsy-87_CQ-I	20.9	-	1
Rd10x_p_00001	2564045	2564418	DNA/TcMar-Tc1#rnd-4_family-459	28.2	-	1
Rd10x_p_00001	2567852	2569149	DNA/TcMar-Tc1#rnd-4_family-459	29.392	+	0
Rd10x_p_00001	2579155	2579346	DNA/TcMar-Mariner#rnd-4_family-2342	27.4	+	0
Rd10x_p_00001	2579558	2579651	DNA/TcMar-Mariner#rnd-4_family-2342	13.1	-	0
Rd10x_p_00001	2594407	2595035	DNA/MULE-MuDR#rnd-6_family-12965	16.274	+	0
Rd10x_p_00001	2597620	2597695	DNA/PiggyBac#rnd-6_family-6403	17.3	-	0
Rd10x_p_00001	2598963	2599034	DNA/Maverick#Polinton-4_PBa	20	+	68
Rd10x_p_00001	2603213	2603246	PLE/Penelope-Athena#AthW	5.9	-	36
Rd10x_p_00001	2631805	2632680	DNA/TcMar-Tc1#rnd-5_family-9292	9.515	+	0
Rd10x_p_00001	2638105	2638186	DNA/MULE-MuDR#rnd-6_family-1219	19	-	42
Rd10x_p_00001	2640861	2640995	DNA/Kolobok#Kolobok_Av	25.3	-	7
Rd10x_p_00001	2668977	2669067	DNA/PIF-Spy#rnd-5_family-4741	25.8	-	2
Rd10x_p_00001	2688237	2688348	DNA/hAT-hobo#rnd-1_family-408	36.6	-	0
Rd10x_p_00001	2714863	2715419	DNA/hAT-Ac#rnd-5_family-5936	16.2	+	31
Rd10x_p_00001	2717170	2718082	DNA/TcMar-Mariner#rnd-5_family-4115	29.6	-	2
Rd10x_p_00001	2750460	2750623	DNA/RC#rnd-5_family-12029	23.5	-	21
Rd10x_p_00001	2756399	2756609	DNA/TcMar-Mariner#rnd-5_family-4115	28	+	15
Rd10x_p_00001	2762489	2762633	DNA/hAT-hobo#rnd-1_family-408	12.666	+	9
Rd10x_p_00001	2768296	2768465	DNA/hAT-hobo#rnd-5_family-389	12.5	-	0
Rd10x_p_00001	2774465	2774552	PLE/Penelope-Athena#AthW2-2	22.1	-	52
Rd10x_p_00001	2775660	2775729	PLE/Penelope-Athena#AthW1-J-R	17.4	+	2
Rd10x_p_00001	2776930	2776967	DNA/TcMar-Tc4#Mariner-38B_SIn	13.2	-	10
Rd10x_p_00001	2776941	2776977	LTR/Gypsy#Gypsy-16_PBa-LTR	8.1	+	9
Rd10x_p_00001	2783517	2783590	PLE/Penelope-Athena#AthW1-J-R	15.2	-	23
Rd10x_p_00001	2797115	2797188	DNA/hAT#hAT8_Av	26.4	+	7
Rd10x_p_00001	2797154	2797200	DNA/hAT#hAT8_Av	8.7	-	8
Rd10x_p_00001	2800449	2800640	DNA/TcMar-Tc1#rnd-1_family-508	22.75	+	2
Rd10x_p_00001	2804640	2804738	LINE/RTE#RTE1_Av	10.1	+	0
Rd10x_p_00001	2810279	2810334	LTR/Pao#BEL-14_CGi-I	11.8	-	772
Rd10x_p_00001	2816204	2817254	DNA/TcMar-Mariner#rnd-4_family-2342	25.2	+	23
Rd10x_p_00001	2819110	2819294	DNA/MULE-MuDR#rnd-3_family-112	24.4	-	0
Rd10x_p_00001	2823729	2823943	DNA/RC#rnd-6_family-1268	13.5	+	0
Rd10x_p_00001	2825749	2826240	DNA/TcMar-Tigger#Tigger2_Av	26.248	+	0
Rd10x_p_00001	2826011	2826250	DNA/TcMar-Mariner#rnd-6_family-7637	26.9	-	0
Rd10x_p_00001	2843460	2843771	DNA/P#P2_Av	28.7	-	2
Rd10x_p_00001	2856623	2856982	DNA/hAT-hobo#rnd-5_family-429	12.6	+	5
Rd10x_p_00001	2865211	2865317	DNA/PiggyBac#piggyBac2_Av	32.1	-	22
Rd10x_p_00001	2884363	2884460	DNA/IS3EU#IS3EU-N1_CGi	18.5	-	0
Rd10x_p_00001	2884738	2884839	DNA/TcMar-Mariner#rnd-4_family-2342	16	+	0
Rd10x_p_00001	2897878	2898022	DNA#rnd-6_family-14715	32.9	-	0
Rd10x_p_00001	2897931	2898055	DNA/hAT#hAT6_Av	26.9	-	0
Rd10x_p_00001	2918770	2919094	DNA/PIF-Spy#rnd-5_family-4741	9.5	-	0
Rd10x_p_00001	2919508	2919826	DNA/PIF-Spy#rnd-5_family-4741	10	+	0
Rd10x_p_00001	2923398	2923465	DNA/hAT-Ac#rnd-6_family-6382	19.7	-	0
Rd10x_p_00001	2944291	2944357	PLE/Penelope-Athena#AthK-V	24.3	-	7
Rd10x_p_00001	2944554	2944601	LTR/Gypsy#Gypsy-37_DAn-I	19.6	-	5
Rd10x_p_00001	2947048	2947134	PLE/Penelope#Penelope-83_LMi	28.6	-	121
Rd10x_p_00001	2951492	2951541	DNA/PIF-Spy#ISL2EU-6_CGi	14.3	+	8
Rd10x_p_00001	2971551	2971794	LINE/RTE#RTE2a_Av	33.5	+	19
Rd10x_p_00001	2980987	2981091	DNA/hAT#hAT16_Av	35.2	+	26
Rd10x_p_00001	2983491	2983537	DNA/MULE-MuDR#DNA-64B_LSal	11.4	-	34
Rd10x_p_00001	2987200	2987598	PLE/Penelope#rnd-5_family-2837	19.9	+	22
Rd10x_p_00001	3011315	3012313	DNA#rnd-6_family-14715	20.8	+	0
Rd10x_p_00001	3016033	3016124	DNA/MULE-MuDR#rnd-6_family-4571	22	-	0
Rd10x_p_00001	3016741	3017606	LTR/Gypsy#rnd-5_family-2035	20.2	-	0
Rd10x_p_00001	3034642	3034816	DNA/RC#rnd-6_family-1268	15.8	+	0
Rd10x_p_00001	3038928	3038975	DNA/hAT-Tip100#hAT-15_HRo	20.8	+	50
Rd10x_p_00001	3053203	3053249	DNA/CMC-Transib#Transib-1_SIn	14.9	-	6
Rd10x_p_00001	3061563	3061626	DNA#DNA3-14_CGi	17.8	+	47
Rd10x_p_00001	3074028	3074087	LINE/L2#Crack-1_CQ	18.3	+	14
Rd10x_p_00001	3077272	3077424	DNA/TcMar-Tc1#rnd-6_family-6000	30.9	+	17
Rd10x_p_00001	3086388	3086510	DNA/hAT#hAT20_Av	24.8	-	14
Rd10x_p_00001	3091190	3091250	LINE/L2#Kiri-13_HMM	19.7	+	4
Rd10x_p_00001	3094800	3094856	DNA/MULE-MuDR#rnd-6_family-1219	14.3	+	74
Rd10x_p_00001	3101173	3101806	LINE#rnd-5_family-3949	16.284	+	30
Rd10x_p_00001	3112708	3112767	DNA/hAT#hAT15_Av	27.1	+	0
Rd10x_p_00001	3119114	3119165	PLE/Penelope#rnd-1_family-843	18	+	1
Rd10x_p_00001	3121438	3121853	DNA/TcMar-Tc1#rnd-4_family-459	21.082	-	2
Rd10x_p_00001	3133460	3133609	DNA/hAT-hobo#rnd-1_family-408	12.8	+	5
Rd10x_p_00001	3147281	3149214	DNA/TcMar-m44#rnd-5_family-831	20.59	+	3
Rd10x_p_00001	3154650	3154762	DNA/Maverick#Polinton-8_NVi	29.7	-	9
Rd10x_p_00001	3154684	3154734	DNA/CMC-EnSpm#DNA3-1_CGi	15.7	-	7
Rd10x_p_00001	3158187	3158463	DNA/Sola#Sola2h_Av	32	+	1
Rd10x_p_00001	3184529	3184719	DNA/hAT-Ac#rnd-5_family-7341	17.8	-	0
Rd10x_p_00001	3194504	3194648	DNA/TcMar-Tc1#rnd-6_family-6000	29.7	-	0
Rd10x_p_00001	3195027	3195049	DNA/TcMar-Tc1#rnd-6_family-6000	31.4	+	0
Rd10x_p_00001	3215013	3215072	LTR/Gypsy#rnd-6_family-4718	12.3	-	23
Rd10x_p_00001	3231204	3231335	PLE/Penelope#rnd-5_family-5596	24.8	+	1
Rd10x_p_00001	3233530	3233676	LTR/Unknown#ltr-1_family-3	31.3	+	28
Rd10x_p_00001	3234646	3234792	LTR/Unknown#ltr-1_family-3	30.1	+	25
Rd10x_p_00001	3234922	3234961	LINE/L2#Daphne-4_LMi	12.5	+	35
Rd10x_p_00001	3252906	3253143	DNA/TcMar-Tc1#rnd-6_family-15063	20.9	+	0
Rd10x_p_00001	3255389	3256257	DNA/TcMar-Tc1#rnd-1_family-218	27.283	+	8
Rd10x_p_00001	3261161	3261331	DNA/PiggyBac-Pokey#Pokey4_Av	33.5	-	0
Rd10x_p_00001	3261536	3261582	DNA/hAT#hAT28a_Av	10.6	-	0
Rd10x_p_00001	3271714	3271793	LINE/L2#Daphne-80_LMi	26.9	-	1
Rd10x_p_00001	3271734	3271794	DNA/Kolobok-T2?#Kolobok-N1_AEc	26.2	+	1
Rd10x_p_00001	3274412	3274513	LINE/L1-Tx1#Tx1-11_CGi	21	-	50
Rd10x_p_00001	3275835	3275922	LTR/Gypsy#Gypsy-24_DEl-I	15.9	+	36
Rd10x_p_00001	3275846	3275931	PLE/Penelope-Athena#AthL3	11.6	+	35
Rd10x_p_00001	3276687	3276743	DNA/Sola-2#Sola2-2_SIn	19.3	+	89
Rd10x_p_00001	3289532	3289567	PLE/Penelope#Penelope-9_HRo	24	+	5
Rd10x_p_00001	3289568	3289625	LINE/L2#Kiri-6_AAe	19.3	-	5
Rd10x_p_00001	3312285	3312333	PLE/Penelope-Athena#AthW2-2	17.5	+	30
Rd10x_p_00001	3312303	3312351	DNA/RC#Helitron-9_CGi	14.3	-	35
Rd10x_p_00001	3313033	3313155	DNA/CMC-EnSpm#EnSpm-N1_NVi	22.6	+	493
Rd10x_p_00001	3314573	3314717	DNA/PiggyBac#rnd-6_family-6403	26.4	-	0
Rd10x_p_00001	3315683	3315824	DNA/PiggyBac#rnd-6_family-6403	22.5	+	0
Rd10x_p_00001	3319629	3320626	DNA/TcMar-Mariner#rnd-6_family-2886	14.3	-	1
Rd10x_p_00001	3321047	3321125	DNA/hAT#hAT15_Av	34.2	-	0
Rd10x_p_00001	3332218	3332771	LTR/Gypsy#rnd-5_family-2035	23.2	+	0
Rd10x_p_00001	3335446	3335676	DNA/P#P4_Av	32.4	+	0
Rd10x_p_00001	3351327	3351373	DNA/RC#Helitron-9_CGi	12.8	-	3
Rd10x_p_00001	3360188	3360550	PLE/Penelope#rnd-5_family-2837	25.3	-	8
Rd10x_p_00001	3362197	3362248	LTR/Unknown#ltr-1_family-24	20.7	+	74
Rd10x_p_00001	3364373	3364593	DNA/hAT-hobo#rnd-1_family-408	14.9	+	0
Rd10x_p_00001	3372193	3372397	DNA/hAT-hobo#rnd-1_family-408	20.7	-	0
Rd10x_p_00001	3373740	3373805	DNA/Sola-1#Sola1-2_AP	18.4	+	0
Rd10x_p_00002	243085	243129	DNA/MULE-MuDR#MULE5_Av	17.8	+	25
Rd10x_p_00002	257840	257897	DNA/hAT-hobo#rnd-1_family-408	8.8	+	22
Rd10x_p_00002	259000	259152	DNA/hAT-hobo#rnd-1_family-408	13.1	+	20
Rd10x_p_00002	264065	264239	DNA/P#P9_Av	34.1	-	29
Rd10x_p_00002	274588	274651	DNA/MULE-MuDR#MULE5_Av	15.6	-	0
Rd10x_p_00002	274827	275218	DNA/TcMar-Tc1#rnd-5_family-2772	25.2	-	0
Rd10x_p_00002	296016	296080	PLE/Penelope#Penelope-6_HRo	20	+	3
Rd10x_p_00002	296031	296168	LTR/Copia#Copia-65_AA-I	20.8	-	14
Rd10x_p_00002	303127	303193	DNA/Sola-2#rnd-6_family-7782	26.9	-	1
Rd10x_p_00002	303669	303843	DNA/TcMar-Mariner#rnd-4_family-2342	22.4	+	0
Rd10x_p_00002	304448	304631	DNA/TcMar-Mariner#rnd-4_family-2342	21.7	-	0
Rd10x_p_00002	326482	326618	DNA/TcMar-Tc1#rnd-3_family-532	23.9	-	0
Rd10x_p_00002	327576	327755	DNA/MULE-MuDR#MULE5_Av	23.6	+	0
Rd10x_p_00002	358832	358884	LTR/Gypsy#Gypsy-24_LG-I	8	-	1
Rd10x_p_00002	370746	371112	DNA/hAT-Ac#rnd-5_family-5936	16.922	+	1
Rd10x_p_00002	372370	372429	DNA/TcMar-Tc4#Mariner-38B_SIn	22	-	1
Rd10x_p_00002	379065	380298	DNA/TcMar-Mariner#Avmar7_Av	26.9	+	38
Rd10x_p_00002	385140	385417	DNA/TcMar-Tc1#rnd-5_family-338	27	+	20
Rd10x_p_00002	388546	388645	LTR/Gypsy#Gypsy-8_ACe-LTR	23	+	17655
Rd10x_p_00002	388570	388611	DNA/PIF-Spy#ISL2EU-1_CFl	9.5	+	11134
Rd10x_p_00002	388574	388661	DNA/Sola-1#Sola1-1_AC	23.5	+	19799
Rd10x_p_00002	392688	392758	LTR/Gypsy#Gypsy-7_MMa-I	22.5	-	0
Rd10x_p_00002	393175	393364	DNA/TcMar-Tc1#PrD37D	33	+	0
Rd10x_p_00002	402532	402606	DNA/MULE-MuDR#rnd-6_family-157	15.3	+	0
Rd10x_p_00002	419899	420072	DNA/PiggyBac#rnd-6_family-5750	17.2	-	0
Rd10x_p_00002	420505	420953	DNA/PIF-Spy#rnd-6_family-8113	26.1	-	0
Rd10x_p_00002	426583	426623	LINE/L2#Daphne-13B_HRo	9.8	-	161
Rd10x_p_00002	438345	438394	DNA/hAT#hAT1_Av	14.9	+	0
Rd10x_p_00002	438683	438964	DNA/hAT#hAT16_Av	29.4	-	0
Rd10x_p_00002	440858	441229	DNA/hAT-hobo#rnd-5_family-2169	15.7	+	0
Rd10x_p_00002	441798	441990	DNA/hAT-hobo#rnd-5_family-2169	13.7	+	0
Rd10x_p_00002	442907	445762	DNA/Ginger-1#rnd-6_family-948	18.352	-	0
Rd10x_p_00002	449055	449137	LTR/Unknown#ltr-1_family-25	24.1	+	42
Rd10x_p_00002	450640	450724	LINE/L2#L2B-3C_AAe	22.9	-	16
Rd10x_p_00002	452015	452068	DNA/RC#Helitron-3N1_NVi	14.8	-	4
Rd10x_p_00002	455327	455365	DNA/hAT-Tip100#rnd-6_family-53	30.5	+	7
Rd10x_p_00002	463016	463242	DNA/TcMar-Tc1#Tc9_Av	25.1	-	4
Rd10x_p_00002	464833	464920	DNA/MULE-MuDR#rnd-6_family-4571	23	-	7
Rd10x_p_00002	484587	485889	DNA/TcMar-Tc1#rnd-6_family-15063	12.9	+	21
Rd10x_p_00002	492862	492930	LTR/Gypsy#ltr-1_family-27	22.1	+	58
Rd10x_p_00002	498803	499856	DNA/hAT-Tip100#rnd-5_family-2070	15.831	-	29
Rd10x_p_00002	518448	518860	DNA/TcMar-Mariner#Avmar7_Av	21.3	+	5
Rd10x_p_00002	551351	551545	DNA/hAT-hobo#rnd-5_family-389	15	+	14
Rd10x_p_00002	560343	561440	DNA/MULE-MuDR#rnd-3_family-112	21.436	+	12
Rd10x_p_00002	581349	582109	DNA/TcMar-Tc1#rnd-3_family-532	18.6	+	0
Rd10x_p_00002	582647	582988	DNA/TcMar-Tc1#rnd-4_family-459	23.676	+	1
Rd10x_p_00002	587193	587280	DNA/Ginger#Ginger2c_Av	26.8	+	0
Rd10x_p_00002	592345	592387	PLE/Penelope#rnd-6_family-6845	13.9	+	1
Rd10x_p_00002	622208	622863	DNA/TcMar-Tc1#Tc2_Av	26.445	+	57
Rd10x_p_00002	624409	624452	LTR/Unknown#ltr-1_family-24	26.1	+	57
Rd10x_p_00002	627986	628038	LTR/Gypsy#Gypsy-11_DBp-I	20.8	-	87
Rd10x_p_00002	632993	633063	LTR/Unknown#ltr-1_family-24	21.1	+	29
Rd10x_p_00002	639166	639742	DNA/TcMar-Mariner#rnd-4_family-2345	26.7	+	0
Rd10x_p_00002	640417	640629	DNA/TcMar-Tc1#rnd-3_family-532	16.1	-	1
Rd10x_p_00002	640628	640992	DNA/TcMar-Tc1#rnd-3_family-532	22.2	+	0
Rd10x_p_00002	643954	644128	DNA/TcMar-Mariner#rnd-4_family-2342	22	+	76
Rd10x_p_00002	644661	644839	DNA/TcMar-Mariner#rnd-4_family-2342	17.5	-	54
Rd10x_p_00002	647308	647975	DNA/TcMar-Mariner#Avmar5_Av	36.3	-	16
Rd10x_p_00002	647976	648367	DNA#rnd-5_family-172	26	-	16
Rd10x_p_00002	649348	649745	DNA/Ginger#Ginger2b_Av	27.822	-	23
Rd10x_p_00002	653288	653348	DNA/Maverick#Polinton-1_DK	14.1	-	17
Rd10x_p_00002	676782	676898	LINE/Soliton#Soliton8_Av	30.8	+	0
Rd10x_p_00002	688077	688278	DNA/hAT#hAT11_Av	20.6	-	8
Rd10x_p_00002	697499	697737	LTR/Unknown#ltr-1_family-1	19.5	-	1
Rd10x_p_00002	697755	697902	LINE/Soliton#Soliton9b_Av	36.6	-	1
Rd10x_p_00002	697903	697923	LINE/I-Jockey#rnd-5_family-3195	35.1	+	1
Rd10x_p_00002	697926	698000	PLE/Penelope#Penelope5_Av	24.7	-	1
Rd10x_p_00002	698912	699162	DNA/PIF-Spy#rnd-5_family-4741	9.6	-	1
Rd10x_p_00002	699330	699654	DNA/PIF-Spy#rnd-5_family-4741	13.5	+	3
Rd10x_p_00002	705516	705788	DNA/CMC-EnSpm#CACTA8_Av	26.8	-	2
Rd10x_p_00002	757603	757666	LTR/Gypsy#Gypsy3-LTR_AP	17.2	+	15
Rd10x_p_00002	767939	768040	DNA/PiggyBac#rnd-6_family-6403	20.6	-	4
Rd10x_p_00002	768542	768684	DNA/PiggyBac#rnd-6_family-6403	23.9	+	4
Rd10x_p_00002	789557	789618	DNA/CMC-Transib#Transib-2_DEl	13.8	+	49
Rd10x_p_00002	794827	794912	DNA/MULE-MuDR#rnd-6_family-1219	18.4	-	172
Rd10x_p_00002	794854	794926	DNA/Crypton#Crypton_Av	17.7	+	144
Rd10x_p_00002	800728	800773	DNA/Zator#Zator1_Av	10.9	+	26
Rd10x_p_00002	805987	806189	DNA/hAT-hobo#rnd-1_family-408	13.9	-	0
Rd10x_p_00002	813011	818192	LINE/I#rnd-5_family-4127	17.401	+	7
Rd10x_p_00002	822905	822951	DNA/TcMar-Tc1#rnd-5_family-337	14.9	-	5
Rd10x_p_00002	842623	843200	DNA/TcMar-Tc1#rnd-5_family-4404	22.6	-	15
Rd10x_p_00002	843117	843476	DNA/P#rnd-1_family-56	26.9	+	10
Rd10x_p_00002	861873	861934	LINE/L2#L2-18_HRo	19.4	+	29
Rd10x_p_00002	862282	862348	LTR/Gypsy#Gypsy61-I_AG	19.4	+	18
Rd10x_p_00002	862293	862313	DNA/MULE-MuDR#rnd-6_family-1219	16.7	+	15
Rd10x_p_00002	862314	862362	DNA/Crypton#Crypton-1_CTe	16.7	-	18
Rd10x_p_00002	862896	862984	DNA/Maverick#Polinton-5_NVi	22.4	+	17
Rd10x_p_00002	875491	875552	DNA/Ginger#Ginger2d_Av	21.3	+	12
Rd10x_p_00002	894449	894506	DNA/P#P4_AG	15.5	+	93
Rd10x_p_00002	915653	915952	DNA/hAT-Tip100#rnd-5_family-4237	26.2	-	14
Rd10x_p_00002	917549	918092	DNA/P#rnd-1_family-56	17.543	-	11
Rd10x_p_00002	917919	917998	DNA/TcMar-Tc1#rnd-6_family-442	18.4	-	11
Rd10x_p_00002	918076	918321	DNA/P#rnd-1_family-56	18.5	+	11
Rd10x_p_00002	920812	921463	DNA/TcMar-Tc1#rnd-5_family-4789	22.649	+	2
Rd10x_p_00002	942918	942986	LTR/Gypsy#Gypsy68-I_AG	14.6	-	16
Rd10x_p_00002	966052	966096	DNA/RC#Helitron-8_DRh	9.6	-	6
Rd10x_p_00002	966929	966967	LINE/L2#L2B-4B_AAe	13.2	+	1
Rd10x_p_00002	966939	966979	DNA/Crypton#Crypton-1_CTe	17.1	-	1
Rd10x_p_00002	976151	976322	DNA/hAT-hobo#rnd-5_family-389	11.2	-	37
Rd10x_p_00002	979111	979164	DNA/CMC-Chapaev-3#EnSpm-3_LSal	20.4	-	37
Rd10x_p_00002	980287	980408	DNA/PiggyBac#piggyBac2_Av	33.6	-	9
Rd10x_p_00002	988839	989110	DNA/TcMar-Tc1#rnd-5_family-2772	27.9	+	0
Rd10x_p_00002	1020961	1022175	DNA/TcMar-Tc2#rnd-6_family-1946	13.436	+	14
Rd10x_p_00002	1030476	1030689	DNA/hAT-hobo#rnd-1_family-408	11.2	+	1
Rd10x_p_00002	1040292	1040410	DNA/TcMar-Tc4#rnd-5_family-335	29.7	+	0
Rd10x_p_00002	1068822	1068925	DNA/P#rnd-1_family-56	10.5	-	27
Rd10x_p_00002	1069249	1069415	DNA/P#rnd-1_family-56	20.6	+	27
Rd10x_p_00002	1073652	1074184	DNA/hAT-Ac#rnd-5_family-5936	14.6	-	22
Rd10x_p_00002	1075217	1075323	DNA/PiggyBac#piggyBac2_Av	25.5	-	1
Rd10x_p_00002	1077282	1077486	DNA/Kolobok#Kolobok2_Av	30.7	+	0
Rd10x_p_00002	1079243	1079332	LINE/I#I-72_AAe	22.4	-	1
Rd10x_p_00002	1090241	1090281	LTR/Pao#BEL-155_AA-LTR	12.2	-	161
Rd10x_p_00002	1093650	1093845	LINE/RTE#RTE2a_Av	26.9	+	0
Rd10x_p_00002	1094428	1094583	DNA/PiggyBac#rnd-6_family-6403	32.5	+	0
Rd10x_p_00002	1094623	1095362	DNA/TcMar-Tc1#rnd-4_family-459	29.463	+	0
Rd10x_p_00002	1152406	1152499	DNA/MULE-MuDR#rnd-6_family-4571	8.5	-	0
Rd10x_p_00002	1159368	1159433	LTR/Gypsy#Gypsy-14_DPu-I	24.2	-	1
Rd10x_p_00002	1160035	1160318	DNA/MULE-MuDR#rnd-6_family-4571	29.2	-	0
Rd10x_p_00002	1179239	1180339	DNA/hAT-Ac#rnd-5_family-904	18.363	-	0
Rd10x_p_00002	1182660	1182946	DNA/RC#rnd-1_family-394	6	-	0
Rd10x_p_00002	1192432	1192470	LINE/CR1#CR1-3_DWi	12.8	+	2
Rd10x_p_00002	1209632	1210940	DNA/TcMar-Tc1#Tc21_Av	18.9	+	8
Rd10x_p_00002	1217099	1217226	LINE/I-Jockey#TART_DV	27.1	-	100
Rd10x_p_00002	1232307	1233524	DNA/TcMar-Mariner#rnd-1_family-467	11.4	-	0
Rd10x_p_00002	1243877	1244104	LTR/Unknown#ltr-1_family-24	28.2	+	23
Rd10x_p_00002	1246323	1246510	DNA/TcMar-Mariner#rnd-6_family-7637	21.3	-	16
Rd10x_p_00002	1246762	1246838	PLE/Penelope-Athena#AthW1-J-R	21.3	-	67
Rd10x_p_00002	1252268	1252336	SINE/tRNA-Core#OK	11.6	+	36
Rd10x_p_00002	1252953	1252990	LINE/R1#TRAS3_BM	10.5	-	25
Rd10x_p_00002	1254220	1254478	LTR/Unknown#ltr-1_family-24	26.4	+	22
Rd10x_p_00002	1258338	1259029	DNA/TcMar-Tc1#rnd-5_family-4789	19.4	+	0
Rd10x_p_00002	1269809	1270791	DNA/TcMar-Mariner#rnd-6_family-1920	18.9	-	2
Rd10x_p_00002	1287491	1287611	LTR/Unknown#ltr-1_family-24	26.6	-	0
Rd10x_p_00002	1303636	1303710	DNA/TcMar-Tc1#Mariner-17_AEc	21.3	+	28
Rd10x_p_00002	1303664	1303720	LTR/Gypsy#Gypsy-3_PBa-I	17.9	-	28
Rd10x_p_00002	1303670	1303730	DNA/TcMar-Tc1#Mariner-68_HSal	19.7	-	26
Rd10x_p_00002	1305569	1305616	DNA/hAT-Charlie#hAT-9_HRo	8.3	+	20
Rd10x_p_00002	1306381	1306427	LTR/Gypsy#Gypsy-18_PBa-I	26.4	+	29
Rd10x_p_00002	1306402	1306419	DNA/Ginger#Ginger1-1_AC	18	-	28
Rd10x_p_00002	1306420	1306462	PLE/Penelope-Athena#AthX-V-T	11.6	+	28
Rd10x_p_00002	1306428	1306470	PLE/Penelope-Athena#AthW2-2	9.5	-	27
Rd10x_p_00002	1310689	1310885	DNA/RC#rnd-1_family-394	14.2	+	101
Rd10x_p_00002	1319319	1319392	PLE/Penelope-Athena#AthX-V-T	18.6	-	47
Rd10x_p_00002	1327818	1327887	DNA#DNA3-10_CGi	20	+	605
Rd10x_p_00002	1327849	1327916	DNA/PIF-Spy#ISL2EU-N1_CGi	14.4	-	29
Rd10x_p_00002	1339322	1339494	DNA/TcMar-Tc1#rnd-1_family-218	26.432	+	27
Rd10x_p_00002	1339611	1339655	DNA/TcMar-Tc1#rnd-1_family-218	17.8	-	27
Rd10x_p_00002	1345244	1345287	LTR/Gypsy#Gypsy68-I_AG	20.4	+	2
Rd10x_p_00002	1346044	1346106	LINE/L2#Daphne-3_CTe	17.5	-	129
Rd10x_p_00002	1346059	1346140	DNA/Kolobok-Hydra#Kolobok-3_Aplcal	24.4	-	143
Rd10x_p_00002	1352628	1352702	DNA/TcMar-Tc1#Mariner-79B_HSal	22.3	+	55
Rd10x_p_00002	1356073	1356477	DNA/hAT-Tip100#rnd-5_family-2070	18.4	-	0
Rd10x_p_00002	1360837	1360887	LINE/I-Jockey#Jockey-15_DBp	17.6	+	2
Rd10x_p_00002	1364500	1364629	DNA/hAT-hobo#rnd-1_family-408	14.183	-	0
Rd10x_p_00002	1374312	1374355	LTR/Gypsy#Gypsy-23_DEl-I	16.3	-	3
Rd10x_p_00002	1376818	1376878	PLE/Penelope#Penelope-86_LMi	19	+	139
Rd10x_p_00002	1392532	1392693	DNA/MULE-MuDR#rnd-6_family-4571	27.4	-	2
Rd10x_p_00002	1402417	1402542	DNA/TcMar-Tc1#rnd-3_family-532	27.1	-	7
Rd10x_p_00002	1415604	1415634	LINE/RTE-ORTE#ORTE-3_AAe	9.7	-	19
Rd10x_p_00002	1416397	1416460	LTR/Gypsy#Gypsy-74_CGi-I	12.8	+	11
Rd10x_p_00002	1421158	1421232	DNA/Ginger#Ginger1-1_AC	25.9	+	26
Rd10x_p_00002	1421173	1421239	DNA/hAT-Tip100#hAT-15_HRo	15.7	+	20
Rd10x_p_00002	1421175	1421252	LINE/L2#Daphne-3_CTe	28.2	+	25
Rd10x_p_00002	1433781	1433895	LINE/RTE#RTE2a_Av	29.7	-	3
Rd10x_p_00002	1433862	1433907	DNA/PiggyBac#rnd-6_family-6403	15.2	+	3
Rd10x_p_00002	1441578	1441642	LTR/Pao#BEL-3-LTR_NVi	19.7	+	139
Rd10x_p_00002	1441587	1441658	LTR/Gypsy#Gypsy-1_DEl-LTR	25	+	152
Rd10x_p_00002	1447736	1448449	DNA/PiggyBac-Uribo#Uribo1_Av	21	+	1
Rd10x_p_00002	1448451	1449104	DNA/PiggyBac#rnd-1_family-348	14.3	+	0
Rd10x_p_00002	1461699	1462012	DNA/Sola#Sola2h_Av	30.3	-	0
Rd10x_p_00002	1463543	1463712	DNA/TcMar-Mariner#rnd-6_family-7637	22.9	+	0
Rd10x_p_00002	1467541	1467636	DNA#DNA8-10_CGi	22.6	+	7
Rd10x_p_00002	1471879	1472000	DNA/PiggyBac#rnd-6_family-6403	24.6	+	0
Rd10x_p_00002	1473940	1474164	DNA/PiggyBac-PB#AvPB3	27.2	-	0
Rd10x_p_00002	1475918	1476113	DNA/CMC-EnSpm#CACTA8_Av	30.5	+	0
Rd10x_p_00002	1484027	1484059	DNA/Ginger#Ginger2d_Av	6.1	+	0
Rd10x_p_00002	1503154	1503235	PLE/Penelope-Athena#AthX-V-T	18.5	+	24
Rd10x_p_00002	1507477	1507677	DNA/TcMar-Tc1#rnd-1_family-218	30.5	+	0
Rd10x_p_00002	1507789	1508263	DNA/TcMar-Tc1#rnd-1_family-218	28.787	-	0
Rd10x_p_00002	1512104	1512152	LTR/Copia#Copia-13_LMi-I	14.3	+	60
Rd10x_p_00002	1515438	1515501	LTR/Gypsy#Gypsy-150_AA-I	22.6	+	0
Rd10x_p_00003	4692	4748	LINE/L2#CR1-8_Hmel	24.6	-	0
Rd10x_p_00003	18033	18126	LINE/L1#L1-59_LSal	26.4	-	25
Rd10x_p_00003	23109	23209	DNA/TcMar-Tc1#rnd-1_family-218	22.7	+	1
Rd10x_p_00003	24038	24156	LTR/Gypsy#Gypsy61-I_AG	26.4	-	3
Rd10x_p_00003	27813	27927	DNA/hAT-Tip100#rnd-6_family-53	27.9	-	4
Rd10x_p_00003	52073	52162	DNA/hAT-Tip100#rnd-6_family-53	19.8	+	0
Rd10x_p_00003	52465	52562	LTR/Gypsy#Gypsy68-I_AG	17.9	-	124
Rd10x_p_00003	62603	62676	DNA/TcMar-Mariner#rnd-1_family-446	19.5	-	17
Rd10x_p_00003	63211	63339	DNA/MULE-MuDR#MuDR10_Av	28.2	+	18
Rd10x_p_00003	83397	83565	LTR/Unknown#ltr-1_family-1	19.9	-	0
Rd10x_p_00003	90477	90566	DNA/MULE-MuDR#rnd-4_family-2201	20.2	-	15
Rd10x_p_00003	101700	102221	DNA/P#rnd-1_family-56	23.341	-	6
Rd10x_p_00003	102321	102548	DNA/TcMar-Tc1#rnd-5_family-4404	24	-	7
Rd10x_p_00003	102547	102750	DNA/P#rnd-1_family-56	27.4	+	8
Rd10x_p_00003	116534	116593	DNA/CMC-EnSpm#CACTA8_Av	22.2	+	0
Rd10x_p_00003	120653	120775	DNA/Ginger#Ginger1-1_AC	28.1	-	21
Rd10x_p_00003	132647	134929	DNA/TcMar-Tc1#rnd-6_family-15063	16.789	+	58
Rd10x_p_00003	151821	152293	DNA/TcMar-Tc1#rnd-1_family-508	19.7	-	0
Rd10x_p_00003	153034	153324	DNA/Sola#Sola2e_Av	32.8	-	0
Rd10x_p_00003	153473	153811	DNA/P#rnd-1_family-56	19.2	-	0
Rd10x_p_00003	154860	154943	DNA/P#P2_Av	25	-	0
Rd10x_p_00003	174271	175882	DNA/TcMar-Mariner#rnd-4_family-2342	21.948	-	0
Rd10x_p_00003	176578	176783	DNA#rnd-6_family-4969	16.2	+	0
Rd10x_p_00003	190750	191113	DNA/TcMar-Tc1#rnd-5_family-338	26.4	+	0
Rd10x_p_00003	202319	202513	DNA/TcMar-Tc1#rnd-5_family-2772	30.6	+	1
Rd10x_p_00003	202671	203009	DNA/TcMar-Tc1#rnd-5_family-170	20.8	-	1
Rd10x_p_00003	216570	218442	LINE/I-Jockey#rnd-5_family-3195	29.603	+	10
Rd10x_p_00003	216582	217603	LINE/Soliton#Soliton8_Av	33.6	-	1
Rd10x_p_00003	231222	231497	DNA/RC#rnd-5_family-12029	32.5	-	0
Rd10x_p_00003	240632	241339	DNA/PiggyBac-Looper#Looper3_Av	29.2	+	0
Rd10x_p_00003	241205	241357	DNA/TcMar-Tc1#rnd-5_family-337	22.8	-	0
Rd10x_p_00003	245758	246018	DNA/PiggyBac#rnd-6_family-4296	15.4	-	1
Rd10x_p_00003	246609	246746	DNA/PiggyBac-Pokey#Pokey3_Av	29.7	-	0
Rd10x_p_00003	253262	253304	DNA/Sola#Sola2h_Av	18.6	-	1
Rd10x_p_00003	253493	255560	LINE/I-Jockey#rnd-5_family-3195	30.828	-	5
Rd10x_p_00003	253641	255894	LINE/Soliton#Soliton7_Av	33.612	+	11
Rd10x_p_00003	260148	260238	DNA/Ginger#Ginger1-1_AC	26.4	+	6
Rd10x_p_00003	264008	264351	LTR/Gypsy#ltr-1_family-27	19.5	+	3
Rd10x_p_00003	279272	279322	DNA/Maverick#Polinton-1_PBa	11.8	+	6
Rd10x_p_00003	300942	300998	LINE/L2#Crack-8_AAe	16.4	-	2
Rd10x_p_00003	308955	309034	DNA/TcMar-Tc1#rnd-1_family-218	28.8	-	1
Rd10x_p_00003	320256	320326	DNA/Maverick#Polinton-8_NVi	27.1	+	0
Rd10x_p_00003	324104	324343	DNA/MULE-MuDR#rnd-6_family-544	17.3	-	9
Rd10x_p_00003	344328	344341	LTR/TelKA#TelKA1a_Av	6.5	-	0
Rd10x_p_00003	344342	345152	LTR/Unknown#ltr-1_family-7	25.455	+	0
Rd10x_p_00003	355753	356595	DNA/CMC-EnSpm#CACTA8_Av	28.288	+	1
Rd10x_p_00003	382926	383437	DNA/hAT-Ac#rnd-5_family-5936	18.076	+	8
Rd10x_p_00003	389369	389646	DNA/PiggyBac#rnd-4_family-328	18.4	-	1
Rd10x_p_00003	392901	393055	DNA/Ginger-1#rnd-6_family-948	32.3	-	0
Rd10x_p_00003	433743	434823	DNA/TcMar-Mariner#rnd-1_family-467	32.8	-	0
Rd10x_p_00003	439373	439438	DNA/CMC-EnSpm#EnSpm5_Av	15.8	+	0
Rd10x_p_00003	447716	447810	DNA/Maverick#Polinton-8_NVi	27.1	-	123
Rd10x_p_00003	465778	465847	DNA/PIF-ISL2EU#ISL2EU-8_CGi	17.1	+	2
Rd10x_p_00003	467458	467530	DNA/Maverick#Polinton-1_DK	12	-	11
Rd10x_p_00003	467498	467570	LINE/L2#Daphne-19_HRo	13.5	+	9
Rd10x_p_00003	471215	471426	LINE/I-Jockey#TART_DV	24.5	-	291
Rd10x_p_00003	472264	472487	LTR/Unknown#ltr-1_family-24	32.3	+	36
Rd10x_p_00003	474064	474147	LTR/Gypsy#Gypsy68-I_AG	22.5	+	46
Rd10x_p_00003	483704	483724	PLE/Penelope-Athena#AthM	20.1	+	52
Rd10x_p_00003	483725	483775	DNA/RC#Helitron-9_CGi	14.3	+	67
Rd10x_p_00003	495697	495746	LINE/L1-Tx1#Tx1-9_CQ	18.4	+	0
Rd10x_p_00003	495757	496084	DNA/Zator#Zator-2_Hrobusta	32.7	+	0
Rd10x_p_00003	496132	496360	DNA/Zator#Zator1_Av	32.5	+	0
Rd10x_p_00003	497088	497317	PLE/Penelope#rnd-5_family-2837	16.1	-	0
Rd10x_p_00003	502626	502670	LINE/L2#L2-8_NVi	13.3	+	14
Rd10x_p_00003	510984	511095	DNA/CMC-EnSpm#EnSpm2_Av	24.1	-	1
Rd10x_p_00003	511051	511181	DNA/CMC-EnSpm#EnSpm2_Av	29.8	+	1
Rd10x_p_00003	511183	513196	LINE/I#rnd-5_family-2795	22.4	+	1
Rd10x_p_00003	513975	514021	PLE/Penelope-Athena#AthW1	21.3	-	22
Rd10x_p_00003	520733	520946	DNA/hAT-hobo#rnd-1_family-408	14	-	8
Rd10x_p_00003	531115	531280	DNA/P#rnd-1_family-56	19.9	-	0
Rd10x_p_00003	531264	531381	DNA/PiggyBac#piggyBac2_Av	31.3	-	0
Rd10x_p_00003	536647	536713	DNA/Maverick#Polinton-3_TC	15.1	-	67
Rd10x_p_00003	538226	539316	LTR/Gypsy#rnd-6_family-4718	25.317	+	218
Rd10x_p_00003	578244	579072	DNA/hAT-Ac#rnd-5_family-904	22.213	-	2
Rd10x_p_00003	585609	585798	PLE/Penelope#rnd-5_family-2837	24.2	+	0
Rd10x_p_00003	586341	586466	DNA/TcMar-Tc1#Tc19_Av	28.8	-	0
Rd10x_p_00003	623207	623252	DNA/hAT-Tip100#hAT-5_HRo	13.3	-	0
Rd10x_p_00003	637057	637085	LINE/I#Nimb-23_LMi	6.9	-	0
Rd10x_p_00003	669108	669158	LINE/L2#Crack-12_AAe	17.6	+	0
Rd10x_p_00003	688849	688884	LTR/Pao#BEL-608_AA-I	11.1	+	0
Rd10x_p_00003	699300	699376	LTR/Copia#Copia-138_AA-I	19.3	+	0
Rd10x_p_00003	815931	815978	LINE/R1#RTAg4	20.8	+	0
Rd10x_p_00003	861619	861692	LTR/Gypsy#Gypsy-290_AA-I	20.6	+	0
Rd10x_p_00003	879636	879686	PLE/Penelope-Athena#AthW2-2	10.2	-	0
Rd10x_p_00003	885693	885728	LTR/Gypsy#Gypsy-26_CGi-LTR	13.9	-	0
Rd10x_p_00003	898105	898152	LTR/Gypsy#Gypsy-9_DVir-I	15.6	+	0
Rd10x_p_00003	898633	898684	DNA#rnd-6_family-4969	14.7	+	0
Rd10x_p_00003	927781	927845	DNA/MULE-NOF#Rehavkus-1_NVi	25	-	0
Rd10x_p_00003	966897	966966	PLE/Penelope-Athena#AthJ-N-W1	15.1	-	0
Rd10x_p_00003	968042	968098	LTR/DIRS#DIRS-2_PBa	28.1	+	0
Rd10x_p_00003	984603	984671	LTR/Pao#BEL-4_CGi-I	19.4	+	0
Rd10x_p_00003	1170099	1170134	LINE/L1-Tx1#Tx1-6_AAe	11.4	+	0
Rd10x_p_00003	1224854	1224903	LINE/I-Jockey#Jockey-1_PPo	18.4	+	0
Rd10x_p_00003	1428380	1428432	LINE/I#I_Ele22	22.6	+	0
Rd10x_p_00004	6045	6119	DNA/MULE-MuDR#MULE5_Av	13.3	-	0
Rd10x_p_00004	9235	10552	LINE/I#rnd-5_family-3886	26.244	-	0
Rd10x_p_00004	10444	10471	LINE/Soliton#Soliton2_Av	34.3	-	0
Rd10x_p_00004	31604	31638	PLE/Penelope-Athena#AthW2-2	11.4	+	87
Rd10x_p_00004	33222	33287	DNA/Kolobok-T2?#Kolobok-N1_AEc	17.4	+	59
Rd10x_p_00004	34324	34385	DNA/RC#Helitron-3N1_NVi	14.5	-	7
Rd10x_p_00004	34343	34418	DNA/hAT-Tip100#hAT-6_HRo	18.4	-	4
Rd10x_p_00004	59598	60055	DNA/MULE-MuDR#rnd-6_family-6074	23	+	0
Rd10x_p_00004	95670	95792	PLE/Penelope-Athena#AthV-L1	20.6	+	24
Rd10x_p_00004	95686	95816	DNA/Crypton#Crypton_Av	18	+	24
Rd10x_p_00004	95977	96013	DNA/Crypton#Crypton_Av	10.8	+	6
Rd10x_p_00004	96654	96699	PLE/Penelope-Athena#AthX-V-T	13	+	6
Rd10x_p_00004	99932	100009	LTR/Gypsy#Gypsy6-NVi_LTR	14.9	+	8
Rd10x_p_00004	99964	100021	PLE/Penelope#Penelope-6_HRo	17.2	-	8
Rd10x_p_00004	99971	100073	LINE/R2-Hero#HERO-3_HR	15.3	+	9
Rd10x_p_00004	101724	101764	LTR/Gypsy#Gypsy-8_ACe-LTR	14.6	-	93
Rd10x_p_00004	104129	104193	LINE/L2#L2-8_NVi	21.5	-	94
Rd10x_p_00004	106254	106337	LTR/Gypsy#ltr-1_family-27	17.6	+	85
Rd10x_p_00004	115475	115515	DNA/TcMar-Mariner#Avmar5a_Av	12.2	-	80
Rd10x_p_00004	115912	116050	DNA/TcMar-Mariner#Avmar5_Av	25.3	-	80
Rd10x_p_00004	116051	116452	DNA#rnd-5_family-172	15.7	-	80
Rd10x_p_00004	116569	116723	DNA/MULE-MuDR#rnd-6_family-9445	20.1	+	80
Rd10x_p_00004	125345	125740	DNA/TcMar-Tc1#rnd-5_family-170	24	-	84
Rd10x_p_00004	126640	126775	PLE/Penelope#rnd-5_family-2837	27.6	-	84
Rd10x_p_00004	127858	128595	DNA/TcMar-Mariner#Avmar5_Av	30.3	-	84
Rd10x_p_00004	131922	132379	PLE/Penelope#rnd-6_family-965	8.47	+	86
Rd10x_p_00004	132394	133501	PLE/Penelope#rnd-6_family-965	22.2	-	105
Rd10x_p_00004	156212	156828	DNA/MULE-MuDR#MuDR3_Av	30.4	-	3
Rd10x_p_00004	161695	161791	DNA/Ginger#Ginger2a_Av	17.7	-	48
Rd10x_p_00004	162582	162808	DNA/TcMar-Tc1#rnd-6_family-442	13.8	+	13
Rd10x_p_00004	163232	163457	DNA/TcMar-Tc1#rnd-6_family-442	13.8	-	13
Rd10x_p_00004	180521	180565	DNA/Ginger#Ginger2_Av	17.8	-	4
Rd10x_p_00004	200225	200484	DNA/TcMar-Mariner#rnd-5_family-4115	23.923	-	18
Rd10x_p_00004	214111	214273	PLE/Penelope-Athena#AthW	26.5	+	1
Rd10x_p_00004	218554	220531	LTR/Gypsy#rnd-6_family-4718	6.2	-	18251
Rd10x_p_00004	221359	221719	DNA/hAT-hobo#rnd-5_family-2169	19.2	+	0
Rd10x_p_00004	222598	222728	DNA/hAT-hobo#rnd-5_family-2169	20	+	0
Rd10x_p_00004	232073	232139	LTR/Gypsy#Gypsy-18_PBa-I	16.6	+	9
Rd10x_p_00004	235011	235338	LINE/RTE-BovB#rnd-6_family-5002	24.226	+	0
Rd10x_p_00004	247734	247914	DNA/TcMar-Tigger#Tigger2_Av	29	-	14
Rd10x_p_00004	247827	247927	DNA/TcMar-Pogo#rnd-5_family-1561	25.5	-	14
Rd10x_p_00004	250264	250324	DNA/PiggyBac#rnd-6_family-6403	15	-	0
Rd10x_p_00004	251110	251319	DNA/RC#rnd-1_family-394	20.7	+	0
Rd10x_p_00004	259070	259963	PLE/Penelope#rnd-5_family-2837	19.458	+	31
Rd10x_p_00004	261918	261981	LTR/Juno-Vesta#Juno1_Av	17.2	-	4
Rd10x_p_00004	271884	271960	DNA#DNA8-4_PBa	17.8	-	3
Rd10x_p_00004	278005	278230	DNA/TcMar-Tc1#rnd-1_family-508	16	+	0
Rd10x_p_00004	291118	291233	DNA/Ginger#Ginger2_Av	24.6	-	14
Rd10x_p_00004	300907	301401	DNA/P#rnd-1_family-56	26	-	1
Rd10x_p_00004	301388	301748	DNA/P#rnd-1_family-56	26.6	+	0
Rd10x_p_00004	306193	306250	LINE/R2-Hero#HERO-3_HR	15.5	-	0
Rd10x_p_00004	307719	307787	LINE/L2#Daphne-40_LMi	23.2	+	34
Rd10x_p_00004	314315	314407	DNA/PiggyBac#piggyBac2_Av	21.7	-	1
Rd10x_p_00004	314825	314935	DNA/PiggyBac#piggyBac2_Av	25.6	+	1
Rd10x_p_00004	315407	315703	DNA#rnd-6_family-4969	13.9	-	2
Rd10x_p_00004	316236	316348	DNA/TcMar-m44#rnd-5_family-974	30.1	+	1
Rd10x_p_00004	320093	320151	LINE/CR1-Zenon#CR1-1_CGi	18.6	-	0
Rd10x_p_00004	327512	327734	DNA/hAT-hobo#rnd-1_family-408	18.2	+	7
Rd10x_p_00004	327871	327991	DNA/TcMar-Pogo#pogo9_Av	30.3	+	7
Rd10x_p_00004	328419	328491	DNA/TcMar-Pogo#pogo8_Av	25	+	7
Rd10x_p_00004	329071	329140	PLE/Penelope-Athena#AthX-V-T	23.2	+	21
Rd10x_p_00004	330816	331035	DNA/hAT-hobo#rnd-1_family-408	14.6	+	13
Rd10x_p_00004	349396	349501	DNA/PiggyBac#rnd-6_family-6403	25.5	-	0
Rd10x_p_00004	349553	349810	DNA/PiggyBac#piggyBac5_Av	27.1	+	0
Rd10x_p_00004	352752	353071	DNA/TcMar-Tc1#rnd-6_family-442	12.846	-	1
Rd10x_p_00004	354227	354464	LINE/I#rnd-5_family-4127	29.6	+	0
Rd10x_p_00004	364658	364768	DNA/P#rnd-1_family-56	28.2	+	1
Rd10x_p_00004	392330	392947	DNA/PiggyBac#rnd-1_family-514	8.1	-	33
Rd10x_p_00004	410502	410722	DNA/hAT-hobo#rnd-1_family-408	15.8	+	2
Rd10x_p_00004	437988	438038	PLE/Penelope-Athena#AthJ-W	10	+	7
Rd10x_p_00004	462731	463161	DNA/PiggyBac#rnd-6_family-2495	26.554	+	1
Rd10x_p_00004	464824	465105	DNA/TcMar-Tc1#rnd-3_family-532	30.8	-	3
Rd10x_p_00004	465549	465633	DNA/hAT#hAT15_Av	24.7	-	0
Rd10x_p_00004	509130	509180	LINE/R2-NeSL#NeSL-2_CRem	17.6	+	14
Rd10x_p_00004	527612	527677	DNA/RC#Helitron-N35_CGi	17.5	+	0
Rd10x_p_00004	533137	533231	DNA/MULE-MuDR#rnd-6_family-157	27.7	+	0
Rd10x_p_00004	533185	533238	DNA/MULE-MuDR#rnd-6_family-157	24.1	-	0
Rd10x_p_00004	545726	545860	DNA/TcMar-Tc1#Tc2_Av	29.7	+	0
Rd10x_p_00004	568451	568734	DNA/hAT-Tip100#rnd-5_family-4237	23.7	-	47
Rd10x_p_00004	580197	580304	DNA/P#rnd-1_family-56	19	-	0
Rd10x_p_00004	591461	592191	DNA/TcMar-Tc1#rnd-3_family-532	29.1	-	0
Rd10x_p_00004	591583	592350	DNA/TcMar-Tc1#rnd-3_family-532	28.4	+	0
Rd10x_p_00004	604504	604550	DNA/RC#Helitron-9_CGi	4.6	-	29
Rd10x_p_00004	605368	605527	DNA/MULE-MuDR#MuDR13_Av	19.9	+	16
Rd10x_p_00004	605835	605906	DNA/MULE-MuDR#rnd-6_family-9445	14.1	+	14
Rd10x_p_00004	605907	606005	DNA/MULE-MuDR#MuDR13_Av	20.3	-	14
Rd10x_p_00004	624035	624189	DNA/TcMar-Tc1#rnd-5_family-4404	21.2	-	1
Rd10x_p_00004	624070	624294	DNA/P#rnd-1_family-56	24.9	+	1
Rd10x_p_00004	641461	641510	PLE/Penelope-Athena#AthW2-1	22	+	5
Rd10x_p_00004	664278	664346	DNA/RC#Helitron-3N1_NVi	13.9	-	13
Rd10x_p_00004	664295	664355	DNA/Kolobok-T2?#Kolobok-N1_AEc	10.2	+	13
Rd10x_p_00004	666139	666203	DNA#DNA2-10_CGi	21.5	-	4
Rd10x_p_00004	689156	689787	DNA/TcMar-Tc1#rnd-5_family-4789	20.424	+	3
Rd10x_p_00004	690105	690990	DNA/TcMar-Tc1#rnd-1_family-508	20.731	+	2
Rd10x_p_00004	815936	816088	LINE/R1#RTAg4	31.7	-	0
Rd10x_p_00004	816362	816507	LINE/I-Jockey#Ag-Jock-1	26.7	+	0
Rd10x_p_00004	817811	817905	LTR/Pao#BEL-30_CQ-I	24.6	-	0
Rd10x_p_00004	845608	845655	LTR/Gypsy#Gypsy-9_DVir-I	10.6	+	0
Rd10x_p_00004	849750	849948	LTR/Gypsy#Gypsy-3_DPu-I	22.6	+	0
Rd10x_p_00004	849925	850245	LTR/Gypsy#Gypsy-3_DPu-I	24.2	+	0
Rd10x_p_00004	955414	956228	LTR/Gypsy#rnd-6_family-4718	27.69	+	0
Rd10x_p_00004	958469	958497	LTR/Gypsy#Gypsy-44_CGi-I	6.9	+	0
Rd10x_p_00004	975135	975205	LTR/Gypsy#Gypsy-14_DAn-I	25.4	+	0
Rd10x_p_00004	979875	979903	LINE/I-Jockey#TART_DV	6.9	+	0
Rd10x_p_00004	1034246	1034353	LINE/I-Jockey#Ag-Jock-1	23.6	-	0
Rd10x_p_00004	1034263	1034365	LTR/Pao#ROO_I	27.2	-	0
Rd10x_p_00004	1062300	1062425	LTR/Pao#BEL-212_AA-I	21.9	-	0
Rd10x_p_00004	1065631	1065687	LTR/Gypsy#Gypsy-N1_DPu-I	9.2	+	0
Rd10x_p_00004	1067220	1067424	LTR/Gypsy#Gypsy-3_DPu-I	31.7	-	0
Rd10x_p_00004	1082467	1082525	LINE/L2#Daphne-34_LMi	20.3	+	0
Rd10x_p_00004	1087596	1087655	LINE/RTE-BovB#RTE-1_DAn	28.3	+	0
Rd10x_p_00004	1133192	1133241	LINE/L1#L1-42_AAe	18.8	-	0
Rd10x_p_00005	6580	6633	LINE/L2#L2-13_Hmel	14.8	+	121
Rd10x_p_00005	18133	18169	LINE/L2#Kiri-23_AAe	13.5	+	18
Rd10x_p_00005	26948	26996	LINE/CR1#CR1-101_AAe	14.3	-	89
Rd10x_p_00005	28185	28254	DNA/hAT-Tip100#hAT-15_HRo	24.3	-	238
Rd10x_p_00005	28203	28258	DNA/Maverick#Polinton-1_DGr	12.5	-	215
Rd10x_p_00005	33273	33386	LINE/L2#L2-8_NVi	17.2	+	3
Rd10x_p_00005	33319	33396	DNA/RC#Helitron-N1_PBa	16.7	-	2
Rd10x_p_00005	34234	34971	DNA/TcMar-Tc1#rnd-3_family-532	22.7	-	2
Rd10x_p_00005	34376	35127	DNA/TcMar-Tc1#rnd-3_family-532	16.8	+	2
Rd10x_p_00005	37617	37926	DNA/hAT-Tip100#rnd-5_family-4237	28.6	+	0
Rd10x_p_00005	38231	38253	DNA/hAT-Tip100#rnd-6_family-53	27.9	-	0
Rd10x_p_00005	38766	39020	DNA/TcMar-Tc1#Tc19_Av	26.1	+	0
Rd10x_p_00005	39350	39745	DNA/hAT-Tip100#rnd-5_family-2070	13.3	-	0
Rd10x_p_00005	46553	46653	PLE/Penelope#Penelope-5_HRo	21.8	+	23
Rd10x_p_00005	52064	52193	DNA/TcMar-Tc1#Tc1_Av	26.7	+	2
Rd10x_p_00005	52458	52472	DNA/hAT-Ac#rnd-5_family-7341	19.2	+	1
Rd10x_p_00005	52473	52667	DNA/hAT#hAT3a_Av	21.2	-	3
Rd10x_p_00005	52510	52561	DNA/hAT#hAT8_Av	18.7	+	2
Rd10x_p_00005	52810	52869	DNA/hAT#hAT3a_Av	12	-	1
Rd10x_p_00005	77035	77415	DNA/TcMar-Tc1#PrD37D	33.6	-	3
Rd10x_p_00005	80434	80481	LTR/Pao#BEL-13_SI-I	17.9	-	3
Rd10x_p_00005	84638	84723	DNA/hAT-hobo#rnd-6_family-5952	16.7	+	0
Rd10x_p_00005	86026	86163	LINE/RTE#RTE2a_Av	23.1	-	0
Rd10x_p_00005	93553	93676	DNA/hAT-Tip100#rnd-6_family-53	23.5	-	0
Rd10x_p_00005	117034	117326	PLE/Penelope#rnd-5_family-2837	18.1	+	17
Rd10x_p_00005	124811	124821	LINE/L2#Daphne-16_HRo	26.7	+	44
Rd10x_p_00005	124822	124872	LTR/Gypsy#Gypsy68-I_AG	19.6	+	57
Rd10x_p_00005	129754	129981	DNA/TcMar-Tc1#rnd-3_family-532	21.2	-	0
Rd10x_p_00005	129967	130463	DNA/TcMar-Tc1#rnd-3_family-532	24.047	+	0
Rd10x_p_00005	174085	174149	LINE/L2#Daphne-7_HMM	26.3	+	3
Rd10x_p_00005	174150	174200	DNA/Kolobok-T2?#Kolobok-N1_AEc	15.7	+	5
Rd10x_p_00005	180891	180950	LINE/R1#TRAS1	20	-	13
Rd10x_p_00005	184503	184603	DNA/MULE-MuDR#rnd-6_family-1219	19	+	168
Rd10x_p_00005	187581	187885	DNA/P#rnd-1_family-56	27.2	+	0
Rd10x_p_00005	187652	187691	DNA/P#rnd-1_family-56	21.9	-	0
Rd10x_p_00005	188281	190561	DNA/MULE-MuDR#rnd-3_family-112	19.16	-	0
Rd10x_p_00005	189409	189495	DNA/MULE-MuDR#rnd-3_family-112	17.9	-	0
Rd10x_p_00005	193417	193507	PLE/Penelope-Athena#AthJ-N	19.8	-	91
Rd10x_p_00005	204433	205592	DNA/CMC-EnSpm#CACTA8_Av	20.118	-	37
Rd10x_p_00005	210024	210105	LTR/Gypsy#Gypsy7-I_Dya	23.1	+	2
Rd10x_p_00005	210039	210083	DNA/RC#Helitron-3N1_NVi	13.3	-	1
Rd10x_p_00005	211662	211745	DNA/RC#Helitron-3N1_NVi	19.1	+	5
Rd10x_p_00005	212649	214260	DNA/Crypton#Crypton_Av	27.497	+	208
Rd10x_p_00005	221994	222058	DNA/TcMar-Tc1#Mariner-87_HSal	26.1	+	31
Rd10x_p_00005	231536	231669	DNA/TcMar-m44#rnd-5_family-974	16.4	-	5
Rd10x_p_00005	239148	239273	DNA/TcMar-Pogo#rnd-6_family-8553	25.8	-	0
Rd10x_p_00005	239847	240022	DNA/hAT#hAT7_Av	26.2	-	0
Rd10x_p_00005	250377	250541	DNA/hAT-hobo#rnd-1_family-408	9.323	+	1
Rd10x_p_00005	259991	260179	LINE/I-Jockey#TART_DV	27.7	-	153
Rd10x_p_00005	265910	266074	DNA/TcMar-Tc1#rnd-6_family-6000	10.4	-	2
Rd10x_p_00005	266707	266871	DNA/TcMar-Tc1#rnd-6_family-6000	11.1	+	1
Rd10x_p_00005	271123	271181	LINE/L2#Kiri-17_HMM	15.2	+	1
Rd10x_p_00005	298459	298500	LINE/L2#L2-8_NVi	9.5	-	15
Rd10x_p_00005	301308	301422	DNA/hAT-Ac#rnd-5_family-7341	22.1	+	14
Rd10x_p_00005	302963	303007	DNA/Crypton#Crypton-1_CTe	13.3	+	60
Rd10x_p_00005	329448	329493	LTR/Gypsy#Gypsy-35_CGi-I	15.2	+	38
Rd10x_p_00005	344185	344231	DNA/RC#Helitron-2_DVir	17	+	25
Rd10x_p_00005	345220	345304	PLE/Penelope-Athena#AthW2-2	16.8	-	9
Rd10x_p_00005	356415	356459	DNA/RC#rnd-1_family-394	13.3	+	29
Rd10x_p_00005	367118	367191	DNA/CMC-EnSpm#DNA3-1_CGi	20.9	-	9
Rd10x_p_00005	368683	368747	LINE/R2-Hero#HERO-5_HR	29.2	+	14
Rd10x_p_00005	368696	368781	PLE/Penelope#Penelope-9_HRo	23.3	-	14
Rd10x_p_00005	384192	384268	LTR/Gypsy#Gypsy68-I_AG	10.5	-	0
Rd10x_p_00005	386662	386721	DNA/Ginger#Ginger1-1_AC	22.9	+	2
Rd10x_p_00005	402428	402505	DNA/Maverick#Polinton-7_NVi	15.8	-	117
Rd10x_p_00005	429823	429862	PLE/Penelope-Athena#AthW1-J-R	12.5	-	51
Rd10x_p_00005	432560	432965	DNA/MULE-MuDR#rnd-6_family-6074	25.3	+	38
Rd10x_p_00005	439693	439982	DNA/Ginger-1#rnd-6_family-948	31.9	+	4
Rd10x_p_00005	440045	440573	DNA/TcMar-m44#rnd-6_family-3050	18.2	-	6
Rd10x_p_00005	443128	443623	DNA/hAT-hobo#rnd-5_family-2169	16.1	-	18
Rd10x_p_00005	448103	448145	PLE/Penelope-Athena#AthW1-J-R	13.9	+	13
Rd10x_p_00005	454198	454250	LTR/Copia#Copia_I	18.9	+	0
Rd10x_p_00005	454372	454579	DNA/PIF-Harbinger#Harbinger3_Av	32	+	0
Rd10x_p_00005	454725	455906	DNA/MULE-MuDR#rnd-3_family-112	17.581	-	2
Rd10x_p_00005	460062	460173	DNA/CMC-EnSpm#EnSpm2_Av	20.5	+	0
Rd10x_p_00005	460635	461006	DNA/MULE-MuDR#MuDR5_Av	28.3	-	0
Rd10x_p_00005	474140	474179	DNA/Crypton#Crypton-1_CTe	12.5	+	3
Rd10x_p_00005	474698	474750	LTR/Gypsy#Gypsy6-I_Dmoj	12.3	-	4
Rd10x_p_00005	478310	478397	PLE/Penelope-Athena#AthX-V-T	16.4	-	78
Rd10x_p_00005	522266	522432	DNA/CMC-EnSpm#EnSpm2_Av	25.9	-	7
Rd10x_p_00005	525671	527744	DNA/TcMar-Tc4#rnd-6_family-11296	23.523	-	0
Rd10x_p_00005	539859	540077	DNA/TcMar-Tc1#rnd-1_family-218	26.7	+	21
Rd10x_p_00005	540166	540334	DNA/TcMar-Tc1#rnd-1_family-218	26.2	-	21
Rd10x_p_00005	541030	541306	DNA/TcMar-Tc1#rnd-3_family-532	34.3	+	25
Rd10x_p_00005	563652	563687	PLE/Penelope#rnd-6_family-4623	25.5	-	5
Rd10x_p_00005	563846	564171	DNA/TcMar-Tc1#rnd-1_family-559	31.4	-	5
Rd10x_p_00005	570031	570603	PLE/Penelope#rnd-5_family-2837	18.5	-	15
Rd10x_p_00005	573691	574492	DNA/Ginger#Ginger2c_Av	23.678	+	3
Rd10x_p_00005	574307	574331	DNA/Ginger#Ginger2c_Av	27.3	+	3
Rd10x_p_00005	620320	621093	DNA/TcMar-Tc1#rnd-4_family-459	27.013	-	0
Rd10x_p_00005	625971	626021	DNA/Ginger#Ginger2_Av	21.6	+	0
Rd10x_p_00005	626004	626076	DNA/Ginger#Ginger2_Av	20.8	-	0
Rd10x_p_00005	626861	627164	DNA/TcMar-m44#rnd-6_family-3050	18.8	+	2
Rd10x_p_00005	627378	627484	DNA/Ginger-1#rnd-6_family-948	24.5	+	0
Rd10x_p_00005	628713	630676	LTR/Gypsy#rnd-6_family-4718	21.11	-	3431
Rd10x_p_00005	640184	640266	DNA/PiggyBac-Looper#Looper4_Av	24.4	-	5
Rd10x_p_00005	643995	644154	DNA/P#rnd-1_family-56	15.6	+	0
Rd10x_p_00005	660711	662133	DNA/TcMar-Tc1#rnd-1_family-508	12.8	+	2
Rd10x_p_00005	662517	662773	DNA/MULE-MuDR#rnd-3_family-112	18.2	+	4
Rd10x_p_00005	666901	667559	DNA/PiggyBac-Looper#Looper4_Av	29.553	+	2
Rd10x_p_00005	672092	672157	DNA/MULE-MuDR#MuDR3_Av	19.7	+	20
Rd10x_p_00005	672112	672164	PLE/Penelope#Penelope-5_HRo	13.5	+	18
Rd10x_p_00005	678829	679335	PLE/Penelope#rnd-5_family-2837	20.4	-	10
Rd10x_p_00005	687800	687873	LINE/CR1#CR1-2_CQ	13.7	+	98
Rd10x_p_00005	689716	690318	DNA/TcMar-Mariner#rnd-4_family-2345	23.8	-	1
Rd10x_p_00005	690319	690722	DNA/TcMar-Mariner#rnd-1_family-446	26.6	-	1
Rd10x_p_00005	694586	694642	DNA/RC#Helitron-3N1_NVi	16.1	+	8
Rd10x_p_00005	701562	701654	LTR/Gypsy#Gypsy61-I_AG	26.7	-	5
Rd10x_p_00005	725271	725492	DNA/hAT-hobo#rnd-1_family-408	17.6	-	0
Rd10x_p_00005	738736	739235	DNA/hAT-hobo#rnd-5_family-2169	10.892	+	15
Rd10x_p_00005	746829	747543	DNA/TcMar-Mariner#rnd-5_family-4115	25.608	+	40
Rd10x_p_00005	748802	748881	DNA/TcMar-Mariner#rnd-5_family-4115	22.5	-	29
Rd10x_p_00005	756812	756988	DNA/PiggyBac#rnd-6_family-2495	23.6	+	0
Rd10x_p_00005	759601	760679	DNA/hAT-Ac#rnd-5_family-904	19.775	-	19
Rd10x_p_00005	764886	764969	LINE/RTE#RTE2a_Av	22	+	0
Rd10x_p_00005	781501	783102	DNA/CMC-EnSpm#EnSpm3_Av	31.224	+	0
Rd10x_p_00005	783248	783356	DNA/CMC-EnSpm#EnSpm4_Av	28.4	+	0
Rd10x_p_00005	789878	790340	DNA/hAT-Ac#rnd-5_family-5936	14.691	+	0
Rd10x_p_00005	802007	802276	DNA/TcMar-Mariner#Avmar5_Av	26	-	0
Rd10x_p_00005	827324	827426	PLE/Penelope#Penelope-50_LMi	20.4	-	17
Rd10x_p_00005	827666	827747	LTR/Gypsy#Gypsy-9_ACe-LTR	25	-	16
Rd10x_p_00005	828368	828416	LINE/R1#TRAS1	18.4	-	17
Rd10x_p_00005	829221	829288	DNA/hAT-Tip100#hAT-6_HRo	19.4	-	12
Rd10x_p_00005	829243	829306	LTR/Gypsy#Gypsy-12_DVir-I	15.6	-	12
Rd10x_p_00005	846512	846624	DNA/P#rnd-1_family-56	27.2	-	0
Rd10x_p_00005	849431	849483	LINE/Dong-R4#R4-1_BX	22.6	-	0
Rd10x_p_00005	856788	857457	DNA/PiggyBac-PB#AvPB4	17.78	-	0
Rd10x_p_00005	868322	868496	DNA/MULE-MuDR#MULE2_Av	31	+	0
Rd10x_p_00005	874690	874791	DNA/Sola#Sola2d_Av	23	+	10
Rd10x_p_00005	876259	876360	DNA/Sola#Sola2d_Av	23	-	10
Rd10x_p_00005	877359	877803	DNA/MULE-MuDR#rnd-6_family-9445	19.958	-	10
Rd10x_p_00005	881473	881586	DNA/TcMar-Pogo#pogo9_Av	31.9	-	12
Rd10x_p_00005	886623	886959	DNA/TcMar-Tc1#rnd-3_family-532	17.4	-	0
Rd10x_p_00005	895580	896001	DNA/TcMar-m44#rnd-6_family-3050	18.1	+	7
Rd10x_p_00005	896159	896264	DNA/Ginger-1#rnd-6_family-948	23.6	+	4
Rd10x_p_00005	918894	918931	LTR/Gypsy#Gypsy-38_AA-I	7.9	-	6
Rd10x_p_00005	922192	922278	DNA/Maverick#Polinton-4_PBa	20.7	-	18
Rd10x_p_00005	922222	922349	PLE/Penelope-Athena#AthV-L1	23.4	-	20
Rd10x_p_00005	933936	934011	PLE/Penelope#rnd-5_family-2837	26.7	-	8
Rd10x_p_00005	935125	935347	DNA/RC#rnd-1_family-394	15.4	+	8
Rd10x_p_00005	941851	942090	DNA/CMC-EnSpm#CACTA8_Av	25.2	-	12
Rd10x_p_00005	970605	970678	LTR/Gypsy#Gypsy-18_IS-I	20.7	+	0
Rd10x_p_00005	980081	980147	LINE/R2#R2-1_RPr	16.9	+	0
Rd10x_p_00005	988174	988236	LTR/Gypsy#Gypsy-13_CGi-I	19.3	-	0
Rd10x_p_00006	8175	8228	LTR/Gypsy#Gypsy-4_CGi-I	13	-	3
Rd10x_p_00006	26365	26434	DNA/Maverick#Polinton-1_DY	20	-	39
Rd10x_p_00006	33737	34068	DNA/hAT-hobo#rnd-5_family-429	14.5	-	0
Rd10x_p_00006	50954	51025	DNA/hAT-hobo#rnd-1_family-408	18.1	+	0
Rd10x_p_00006	62614	62818	DNA/PiggyBac#rnd-5_family-4071	23.5	+	1
Rd10x_p_00006	62816	62997	DNA/PiggyBac#rnd-1_family-348	16.7	+	0
Rd10x_p_00006	70647	70683	LINE/L2#Daphne-37_LMi	13.5	-	31
Rd10x_p_00006	74212	74275	LTR/Unknown#ltr-1_family-24	14.8	-	13
Rd10x_p_00006	76213	76294	LTR/Gypsy#Gypsy-33-LTR_NVi	19.5	+	134
Rd10x_p_00006	80124	80182	DNA/TcMar#NAVIMARN1	14	+	1
Rd10x_p_00006	80265	80326	LINE/L2#L2-10_Hmel	11.5	-	4
Rd10x_p_00006	82861	82936	LTR/Gypsy#Gypsy-38_NVi-LTR	23	-	15
Rd10x_p_00006	82940	83004	LTR/Gypsy#Gypsy68-I_AG	17.5	+	15
Rd10x_p_00006	82965	83017	SINE/tRNA-Core#OK	17.3	+	15
Rd10x_p_00006	103531	103824	DNA/TcMar-Mariner#rnd-4_family-2345	22.4	+	0
Rd10x_p_00006	122897	122941	DNA/RC#rnd-6_family-1268	13.3	+	0
Rd10x_p_00006	122974	123269	LTR/Juno-Vesta#Vesta4b_Av	19.2	-	0
Rd10x_p_00006	174345	174459	DNA/PiggyBac#rnd-6_family-6368	23.6	+	2
Rd10x_p_00006	210432	210473	DNA/Maverick#Polinton-7_NVi	14.3	-	44
Rd10x_p_00006	221091	222086	DNA/MULE-MuDR#rnd-6_family-544	23.26	+	0
Rd10x_p_00006	237527	237739	DNA/TcMar-Tc1#rnd-6_family-273	30	-	0
Rd10x_p_00006	237563	237704	DNA/TcMar-Tc1#Tc14_Av	27.3	+	0
Rd10x_p_00006	237780	237877	DNA/Ginger-1#rnd-6_family-948	23.7	-	0
Rd10x_p_00006	237985	238148	DNA/MULE-MuDR#rnd-4_family-2201	19	+	1
Rd10x_p_00006	245413	245489	DNA/TcMar-Tc1#rnd-6_family-6000	27.3	-	1
Rd10x_p_00006	245458	245789	DNA/TcMar-Tc4#rnd-6_family-4666	31.1	+	1
Rd10x_p_00006	251235	252114	DNA/TcMar-Tc4#rnd-5_family-335	15.059	-	0
Rd10x_p_00006	251315	252193	DNA/TcMar-Tc4#rnd-5_family-335	17.314	+	0
Rd10x_p_00006	255866	255948	DNA/MULE-MuDR#rnd-6_family-157	25.6	+	1
Rd10x_p_00006	255882	256562	DNA/MULE-MuDR#rnd-6_family-157	25.974	-	2
Rd10x_p_00006	259383	259404	PLE/Penelope#Penelope-5_HRo	26.1	-	105
Rd10x_p_00006	261019	261091	DNA/CMC-EnSpm#EnSpm-2_SIn	19.2	-	26
Rd10x_p_00006	271535	271697	DNA/MULE-MuDR#rnd-3_family-112	18.5	-	0
Rd10x_p_00006	275316	275647	LTR/Gypsy#ltr-1_family-27	26.3	-	0
Rd10x_p_00006	278322	278415	DNA/TcMar-Mariner#rnd-4_family-2345	17.1	+	0
Rd10x_p_00006	300874	300953	DNA#DNA3-10_CGi	23.4	+	42
Rd10x_p_00006	304218	304330	LTR/Gypsy#Gypsy-43_DWil-I	16.1	+	230
Rd10x_p_00006	347516	347591	PLE/Penelope-Athena#AthV-L1	20.6	-	3
Rd10x_p_00006	347520	347626	LINE/I-Jockey#TART_DV	24.4	-	3
Rd10x_p_00006	349939	351209	DNA/hAT#hAT23_Av	31.372	-	0
Rd10x_p_00006	352604	353230	DNA/TcMar-Tc1#Tc7_Av	29.8	-	8
Rd10x_p_00006	358567	358609	LTR/Gypsy#MDG3_I	16.3	-	1
Rd10x_p_00006	366859	367351	LTR/Gypsy#rnd-5_family-2035	17.7	-	0
Rd10x_p_00006	391878	391943	LTR/Gypsy#Gypsy-13_DBp-I	21.9	+	38
Rd10x_p_00006	393137	393170	DNA/hAT-Tip100#hAT-15_HRo	0	+	20
Rd10x_p_00006	418894	419235	LINE/RTE-BovB#RTE_BovB_Av	36.5	-	0
Rd10x_p_00006	420697	420996	DNA/TcMar-Tc4#rnd-5_family-105	17.3	-	0
Rd10x_p_00006	420999	421752	DNA/TcMar-Tc4#rnd-1_family-783	15.602	+	0
Rd10x_p_00006	421747	422614	DNA/TcMar-Tc4#rnd-5_family-106	12.264	-	0
Rd10x_p_00006	467734	468042	DNA/P#rnd-1_family-56	33.6	-	19
Rd10x_p_00006	476740	476779	LINE/CR1#CR1-103_AAe	10.3	-	92
Rd10x_p_00006	479058	479196	DNA/PiggyBac#rnd-6_family-6403	21.2	+	0
Rd10x_p_00006	485531	485676	DNA/hAT-hobo#rnd-1_family-408	18.4	+	21
Rd10x_p_00006	488492	488611	DNA/TcMar-Tc1#Mariner-N5_HSal	22.6	+	1
Rd10x_p_00006	494742	495687	DNA/MULE-MuDR#rnd-3_family-112	20.187	-	1
Rd10x_p_00006	503711	503926	DNA/TcMar-Tc1#rnd-5_family-338	22.1	+	5
Rd10x_p_00006	511830	511951	DNA/PIF-ISL2EU#ISL2EU1_Av	24.1	-	12
Rd10x_p_00006	522968	523057	DNA/Kolobok#Kolobok-10N1_CGi	28.4	-	0
Rd10x_p_00006	528628	528798	DNA/PiggyBac#rnd-6_family-4296	17.6	-	0
Rd10x_p_00006	539697	539790	DNA/hAT-Tip100#rnd-6_family-53	25.6	-	0
Rd10x_p_00006	543261	543433	DNA/TcMar-Tc1#rnd-1_family-218	29.1	+	0
Rd10x_p_00006	543493	543644	DNA/TcMar-Tc1#rnd-1_family-218	28.5	-	0
Rd10x_p_00006	553668	553718	DNA/Crypton#Crypton-N23_CGi	15.4	-	20
Rd10x_p_00006	568508	568557	DNA/MULE-MuDR#MULE5_Av	18	-	1
Rd10x_p_00006	577910	578139	DNA/P#rnd-1_family-56	29.7	+	1
Rd10x_p_00006	585067	585117	DNA/RC#Helitron-N1_HSal	17.6	-	2
Rd10x_p_00006	588449	588585	LINE/L2#L2-12_CTe	14.3	+	2
Rd10x_p_00006	588478	588713	PLE/Penelope#Penelope-5_HRo	18.7	-	6
Rd10x_p_00006	593304	593390	DNA/RC#Helitron-3N1_NVi	22	+	30
Rd10x_p_00006	625321	625386	DNA/hAT-hATm#hAT-6_AP	17.5	+	21
Rd10x_p_00006	625671	625847	DNA/MULE-MuDR#MuDR5_Av	26	+	21
Rd10x_p_00006	628543	628638	DNA/hAT-Tip100#rnd-6_family-53	21.5	-	16
Rd10x_p_00006	631172	631578	DNA/MULE-MuDR#rnd-6_family-9445	21.469	+	11
Rd10x_p_00006	648596	648660	DNA/CMC-Transib#Transib-6_DBp	18.5	-	19
Rd10x_p_00006	661621	661818	LTR/Unknown#ltr-1_family-24	23	-	0
Rd10x_p_00006	663099	663313	DNA/TcMar-Tc1#rnd-1_family-508	22.5	-	0
Rd10x_p_00006	697290	697443	DNA/MULE-MuDR#rnd-6_family-6074	23.3	+	15
Rd10x_p_00006	718184	718495	DNA/TcMar-Tc1#rnd-1_family-508	29.4	-	0
Rd10x_p_00006	720021	720645	DNA/TcMar-Pogo#pogo13_Av	37.7	-	0
Rd10x_p_00006	740984	741118	DNA/Sola#Sola2h_Av	27.8	-	0
Rd10x_p_00006	748904	749089	DNA/TcMar-Mariner#rnd-6_family-7637	32.2	+	9
Rd10x_p_00006	785710	785867	DNA/hAT-hobo#rnd-1_family-408	14.6	-	47
Rd10x_p_00006	794634	795073	PLE/Penelope#rnd-5_family-2837	19.9	+	3
Rd10x_p_00006	830678	830712	DNA/hAT-hobo#rnd-1_family-408	5.7	+	44
Rd10x_p_00006	831014	831191	DNA/hAT-hobo#rnd-5_family-389	13.2	+	45
Rd10x_p_00006	844273	844286	DNA/RC#Helitron-9_CGi	20.4	+	16
Rd10x_p_00006	844287	844324	PLE/Penelope-Athena#AthX-V-S	10.5	+	16
Rd10x_p_00006	851478	851549	DNA/PIF-Harbinger#DNA3-13B_CGi	21	-	0
Rd10x_p_00006	851492	851560	DNA/hAT-Tip100#hAT-N23_LMi	21.7	-	0
Rd10x_p_00006	851499	851596	LTR/Gypsy#Gypsy-62_CQ-LTR	22.9	+	0
Rd10x_p_00006	851513	851604	DNA/CMC-EnSpm#DNA3-1_CGi	16.1	+	0
Rd10x_p_00006	888367	888556	DNA/TcMar-Mariner#rnd-1_family-446	20.3	+	0
Rd10x_p_00006	889009	889117	DNA/TcMar-Tc1#rnd-1_family-218	26.2	+	0
Rd10x_p_00006	897886	897957	DNA/PiggyBac#piggyBac-N2_RPr	16.7	-	16
Rd10x_p_00006	912390	912904	DNA/TcMar-Mariner#Avmar5a_Av	26.8	-	0
Rd10x_p_00006	912933	913315	DNA#rnd-5_family-172	13.6	-	0
Rd10x_p_00006	916199	918208	DNA/P#P8_Av	33.329	+	0
Rd10x_p_00006	942339	942533	DNA/Sola-2#rnd-6_family-13845	22.7	-	15
Rd10x_p_00006	968797	968880	PLE/Penelope-Athena#AthK-V	19	-	0
Rd10x_p_00007	35424	36091	DNA/hAT#hAT26_Av	27.2	+	0
Rd10x_p_00007	54385	54651	DNA/hAT-Ac#rnd-5_family-7341	9.8	-	0
Rd10x_p_00007	70418	70498	DNA/CMC-EnSpm#CACTA8_Av	22.1	-	0
Rd10x_p_00007	89893	90008	DNA/TcMar-Pogo#rnd-6_family-8553	19.3	-	5
Rd10x_p_00007	92658	92728	DNA/hAT#hAT30_Av	15.7	+	0
Rd10x_p_00007	93854	94493	DNA/hAT#hAT28_Av	22.2	-	0
Rd10x_p_00007	94758	94930	DNA/hAT#hAT28a_Av	21.7	-	0
Rd10x_p_00007	95132	95255	DNA/MULE-MuDR#MuDR5_Av	26.9	+	0
Rd10x_p_00007	95317	95551	PLE/Penelope-Athena#AthP	30.3	+	0
Rd10x_p_00007	95933	95985	PLE/Penelope-Athena#AthQ	28.3	+	0
Rd10x_p_00007	99653	99842	LTR/Unknown#ltr-1_family-3	26.9	+	0
Rd10x_p_00007	99846	99909	LTR/Unknown#ltr-1_family-3	25.4	+	0
Rd10x_p_00007	129614	129748	DNA/Sola#Sola2h_Av	35.5	-	0
Rd10x_p_00007	131142	131232	DNA/PiggyBac#piggyBac2_Av	26.4	-	0
Rd10x_p_00007	146465	146649	DNA/P#P7_Av	14.5	-	0
Rd10x_p_00007	146578	146752	DNA/P#P7_Av	15.8	+	0
Rd10x_p_00007	157874	158062	DNA/TcMar-Tc1#rnd-5_family-4789	15.1	+	0
Rd10x_p_00007	158064	158532	DNA/TcMar-Tc1#rnd-1_family-559	31.3	+	0
Rd10x_p_00007	158326	158616	DNA/TcMar-Tc1#rnd-5_family-4789	20.8	-	0
Rd10x_p_00007	160954	161133	LTR/Unknown#ltr-1_family-24	30.7	-	0
Rd10x_p_00007	168369	168991	DNA/TcMar-Tc1#rnd-5_family-4789	15.1	-	16
Rd10x_p_00007	168992	169117	DNA/TcMar-Tc1#Tc12_Av	27	+	16
Rd10x_p_00007	177455	177681	DNA/hAT-Tip100#rnd-6_family-53	26.9	+	2
Rd10x_p_00007	194486	194618	DNA/P#P6_Av	25.2	-	0
Rd10x_p_00007	211577	211770	DNA/Kolobok#Kolobok2_Av	28.5	+	14
Rd10x_p_00007	215040	215089	DNA/PiggyBac#rnd-1_family-348	14	-	11
Rd10x_p_00007	234102	234239	LTR/Unknown#ltr-1_family-24	30.6	-	9
Rd10x_p_00007	235660	236236	DNA/TcMar-Tc1#rnd-1_family-218	19.453	-	30
Rd10x_p_00007	246490	246958	DNA/TcMar-Tc1#rnd-1_family-218	22	-	0
Rd10x_p_00007	249172	249307	DNA/TcMar-Pogo#rnd-5_family-1561	22.1	-	0
Rd10x_p_00007	255144	255353	DNA/TcMar-Mariner#rnd-4_family-2345	19.6	-	1
Rd10x_p_00007	255352	255417	DNA/TcMar-Mariner#rnd-4_family-2345	15.6	+	1
Rd10x_p_00007	257147	257359	DNA/TcMar-Mariner#Avmar6_Av	30.9	+	2
Rd10x_p_00007	257580	257912	DNA/TcMar-Mariner#Avmar6_Av	32.1	-	5
Rd10x_p_00007	264442	264480	DNA/MULE-MuDR#rnd-6_family-8443	2.6	+	0
Rd10x_p_00007	264722	264814	DNA/Ginger#Ginger2b_Av	28	-	0
Rd10x_p_00007	264886	264966	DNA/MULE-MuDR#rnd-3_family-112	16.2	-	0
Rd10x_p_00007	275521	275581	LTR/Gypsy#Gypsy-610_AA-I	25.4	+	8
Rd10x_p_00007	281527	281773	DNA/TcMar-Tc1#rnd-1_family-508	16.2	+	0
Rd10x_p_00007	282066	282196	DNA/Sola-3#rnd-6_family-2888	21.1	+	0
Rd10x_p_00007	284801	285169	DNA/PiggyBac-PB#AvPB3	35.6	-	0
Rd10x_p_00007	303096	303133	DNA/TcMar-Tc4#Mariner-N1B_LMi	10.5	+	2
Rd10x_p_00007	333168	333311	DNA/TcMar-Mariner#rnd-4_family-2345	28.4	-	0
Rd10x_p_00007	339868	340428	DNA/PiggyBac#rnd-4_family-328	14.9	+	0
Rd10x_p_00007	340482	340667	DNA/PiggyBac#AvPB2	23.9	+	0
Rd10x_p_00007	343352	343505	DNA/TcMar-Tc1#rnd-1_family-218	25.3	-	11
Rd10x_p_00007	349848	349889	DNA/hAT-Tip100#rnd-6_family-53	17.1	-	9
Rd10x_p_00007	358167	358228	DNA/PiggyBac#rnd-6_family-6403	18	+	0
Rd10x_p_00007	376091	376240	DNA/TcMar-Tc1#Mariner-83_HSal	25.8	+	0
Rd10x_p_00007	376512	376562	DNA/TcMar-Mariner#Avmar5a_Av	17.6	+	0
Rd10x_p_00007	378354	378434	DNA/MULE-MuDR#rnd-4_family-2201	25.9	-	0
Rd10x_p_00007	392772	392820	LINE/CR1#CR1-1_DAn	11.2	+	5
Rd10x_p_00007	395134	395300	DNA/TcMar-Mariner#rnd-4_family-2345	18.9	-	5
Rd10x_p_00007	398567	398651	DNA/RC#Helitron-3N1_NVi	20	+	3
Rd10x_p_00007	416232	416417	DNA/TcMar-Tc1#rnd-1_family-559	26.8	+	4
Rd10x_p_00007	428373	428390	LTR/Unknown#ltr-1_family-24	27.7	+	0
Rd10x_p_00007	436575	436650	LTR/Gypsy#Gypsy14-LTR_Dpse	19.7	+	20
Rd10x_p_00007	439652	439686	DNA/Ginger#Ginger2d_Av	8.6	+	1
Rd10x_p_00007	445645	445893	DNA/PiggyBac-Looper#Looper3_Av	33.4	-	0
Rd10x_p_00007	466361	467436	LINE/L2#rnd-5_family-2872	31.3	-	0
Rd10x_p_00007	495871	496156	DNA/TcMar-Sagan#rnd-5_family-1033	21.007	+	1
Rd10x_p_00007	496150	496278	DNA/RC#rnd-6_family-35	20.3	-	0
Rd10x_p_00007	498348	498712	DNA/hAT-Ac#rnd-5_family-5936	17.6	+	0
Rd10x_p_00007	508939	509554	DNA/Sola-2#rnd-6_family-13845	14.2	+	0
Rd10x_p_00007	536450	536517	DNA#DNA4-6_CGi	13	-	8
Rd10x_p_00007	536484	536543	PLE/Penelope-Athena#AthV-L1	15.5	+	5
Rd10x_p_00007	548773	548824	LINE/L1#L1-28_LSal	16.8	+	0
Rd10x_p_00007	559435	559483	DNA/PiggyBac-PB#AvPB1	18.4	+	0
Rd10x_p_00007	569087	570323	LINE/RTE#RTE2a_Av	32.758	-	0
Rd10x_p_00007	580014	580237	DNA/TcMar-Tc1#rnd-5_family-337	17.4	+	0
Rd10x_p_00007	594322	594904	DNA/PiggyBac#rnd-1_family-514	16.309	+	31
Rd10x_p_00007	609795	609847	DNA/Ginger#Ginger2e_Av	20.8	+	47
Rd10x_p_00007	617163	617446	DNA/Ginger-1#rnd-6_family-948	18.8	-	0
Rd10x_p_00007	623846	624055	DNA/RC#rnd-1_family-394	13.8	+	0
Rd10x_p_00007	641047	641231	PLE/Penelope#rnd-5_family-2837	17.3	+	1
Rd10x_p_00007	644979	645255	LINE/Soliton#Soliton5_Av	37.4	-	0
Rd10x_p_00007	645010	645797	LINE/I#rnd-5_family-4127	32.835	-	0
Rd10x_p_00007	645807	646029	LINE/I#rnd-5_family-4127	29.6	-	0
Rd10x_p_00007	645859	646317	LINE/Soliton#Soliton4_Av	33.4	-	0
Rd10x_p_00007	657323	657481	DNA/PiggyBac-Pokey#Pokey3_Av	22.8	+	2
Rd10x_p_00007	658394	658469	DNA/hAT#hAT27_Av	15.8	-	1
Rd10x_p_00007	687609	687963	DNA/TcMar-Mariner#rnd-4_family-2345	26.499	-	1
Rd10x_p_00007	688134	688313	DNA/TcMar-Mariner#rnd-1_family-446	25.1	-	1
Rd10x_p_00007	688271	688342	LTR/Gypsy#Gypsy-3_HMM-I	20.3	-	1
Rd10x_p_00007	688951	689392	DNA/TcMar-Mariner#rnd-1_family-446	29.6	+	4
Rd10x_p_00007	689401	689871	DNA/TcMar-Mariner#rnd-4_family-2345	25.071	+	3
Rd10x_p_00007	696385	696988	DNA/MULE-MuDR#rnd-6_family-2285	27.3	+	2
Rd10x_p_00007	701232	701305	DNA/hAT-hobo#rnd-1_family-408	10.8	-	1
Rd10x_p_00007	702970	703268	DNA/TcMar-Tc4#rnd-5_family-105	15.4	-	1
Rd10x_p_00007	703272	703430	DNA/TcMar-Tc4#rnd-1_family-783	15.1	+	1
Rd10x_p_00007	704827	705136	DNA/TcMar-Tc4#rnd-1_family-783	17.5	+	1
Rd10x_p_00007	705019	706317	DNA/TcMar-Tc4#rnd-5_family-106	14.7	-	7
Rd10x_p_00007	710574	710748	DNA/Sola#Sola2e_Av	30.8	+	0
Rd10x_p_00007	711391	711649	DNA/TcMar-Mariner#rnd-1_family-446	26.3	+	0
Rd10x_p_00007	712299	712495	LTR/Unknown#ltr-1_family-8	14.4	-	15
Rd10x_p_00007	724873	724982	DNA/TcMar-Mariner#rnd-4_family-2345	25.4	+	0
Rd10x_p_00007	727311	727370	DNA/TcMar-Tc2#rnd-6_family-1946	25.4	+	0
Rd10x_p_00007	735526	735647	DNA/hAT#hAT32_Av	31.7	+	0
Rd10x_p_00007	738392	739289	PLE/Penelope-Athena#AthJ-N-W1	27.7	+	0
Rd10x_p_00007	745927	745966	PLE/Penelope-Athena#AthW1	17.7	-	0
Rd10x_p_00007	759671	759774	LTR/Copia#Copia-73_AA-I	25	-	47
Rd10x_p_00007	772813	772898	LINE/R2-Hero#HERO-3_HR	18.6	+	41
Rd10x_p_00007	772840	772917	LTR/Gypsy#Gypsy-50_CQ-I	23	+	35
Rd10x_p_00007	772858	772956	LTR/Gypsy#Gypsy-8_HMM-LTR	25.6	-	34
Rd10x_p_00007	778001	778097	DNA/TcMar-Mariner#Avmar6_Av	22.1	-	12
Rd10x_p_00007	784335	784570	DNA/P#rnd-1_family-56	24.8	-	8
Rd10x_p_00007	784884	785204	DNA/TcMar-Tc1#Tc19_Av	26.4	-	0
Rd10x_p_00007	786200	786271	DNA/TcMar-Mariner#Avmar5a_Av	25	+	0
Rd10x_p_00007	786258	786853	DNA/TcMar-Mariner#Avmar5_Av	27.8	+	0
Rd10x_p_00007	790206	790934	DNA/TcMar-Mariner#Avmar5_Av	26.9	-	0
Rd10x_p_00007	790935	791056	DNA#rnd-5_family-172	12.7	-	1
Rd10x_p_00007	817324	817369	DNA/Maverick#Polinton-1_ACe	11.1	-	6
Rd10x_p_00007	817920	818006	DNA/MULE-MuDR#MuDR1_Av	23.9	+	0
Rd10x_p_00007	819967	820311	DNA/TcMar-Tc1#rnd-4_family-459	25.7	+	0
Rd10x_p_00007	829064	829105	DNA/Maverick#Polinton-2_ACe	14.3	-	2
Rd10x_p_00007	845698	847252	DNA/MULE-MuDR#rnd-3_family-112	20.8	+	2
Rd10x_p_00007	852059	852187	LTR/Unknown#ltr-1_family-10	19	-	0
Rd10x_p_00007	861093	861263	DNA/TcMar-Mariner#rnd-5_family-4115	23.4	+	0
Rd10x_p_00007	867283	867558	DNA/PiggyBac#rnd-1_family-514	26.8	-	16
Rd10x_p_00007	872718	872853	LTR/Pao#rnd-1_family-90	23.9	+	0
Rd10x_p_00007	875802	875958	DNA/MULE-MuDR#MULE2_Av	27.3	-	0
Rd10x_p_00007	910159	910337	DNA/TcMar-Tc4#rnd-1_family-783	28.8	-	0
Rd10x_p_00007	910428	910553	DNA/TcMar-Tc4#rnd-5_family-105	28.6	+	0
Rd10x_p_00007	912716	912741	PLE/Penelope-Athena#AthW2-1	22.2	-	129
Rd10x_p_00007	912763	912810	DNA/Crypton#Crypton-1_CTe	10.4	-	119
Rd10x_p_00007	934689	934791	DNA/RC#Helitron-like-13_Hmel	26.2	+	1
Rd10x_p_00007	935262	935614	DNA/MULE-MuDR#MuDR5_Av	30.6	+	1
Rd10x_p_00007	940315	940522	DNA/TcMar-Tc1#rnd-1_family-508	17	+	1
Rd10x_p_00007	947674	947721	LTR/Gypsy#Gypsy-20_DBp-I	16.7	-	0
Rd10x_p_00008	12089	12193	DNA/TcMar-Tc1#rnd-5_family-4404	30.8	-	35
Rd10x_p_00008	18752	18798	DNA/Ginger#Ginger1-1_AC	19.1	+	0
Rd10x_p_00008	18763	18817	LTR/Pao#BEL-30_CQ-LTR	17.4	-	0
Rd10x_p_00008	35893	36012	DNA/Sola#Sola2d_Av	22.2	+	1
Rd10x_p_00008	40964	41028	LTR/Gypsy#Gypsy-40_DPu-I	18.1	-	45
Rd10x_p_00008	49101	49799	DNA/PiggyBac#rnd-5_family-4948	19.938	+	0
Rd10x_p_00008	78803	78891	DNA#DNA-11_CGi	22.4	-	9
Rd10x_p_00008	89737	89778	LINE/I-Jockey#TART_DV	16.7	-	199
Rd10x_p_00008	90919	90976	DNA/Maverick#Polinton-1_NVi	13.8	-	1
Rd10x_p_00008	98770	99001	DNA/TcMar-Mariner#Avmar2_Av	30.4	-	46
Rd10x_p_00008	99308	99539	DNA/TcMar-Mariner#Avmar2_Av	26.5	+	46
Rd10x_p_00008	107266	107308	PLE/Penelope-Athena#AthX-V-T	11.6	-	40
Rd10x_p_00008	114519	114583	DNA/hAT-hATm#hAT-N21_LSal	25	+	33
Rd10x_p_00008	120821	122523	DNA/TcMar-Mariner#Avmar6_Av	18.4	-	9
Rd10x_p_00008	122610	124526	DNA/TcMar-Mariner#rnd-5_family-4115	29.881	-	0
Rd10x_p_00008	122871	122929	DNA/TcMar-Mariner#Mariner-6_DF	24.1	-	0
Rd10x_p_00008	124604	124683	DNA/TcMar-Mariner#rnd-5_family-4115	14.3	+	0
Rd10x_p_00008	135233	135931	DNA/TcMar-Mariner#Avmar7_Av	32.6	-	6
Rd10x_p_00008	151355	151547	DNA/PiggyBac#rnd-1_family-348	15.7	+	4
Rd10x_p_00008	181521	181586	DNA/hAT-Charlie#hAT-11_HRo	14.6	-	2
Rd10x_p_00008	184783	184816	PLE/Penelope-Athena#AthW2-1	22.1	+	16
Rd10x_p_00008	191839	193548	DNA/TcMar-Mariner#rnd-5_family-4115	29.5	+	2
Rd10x_p_00008	194246	194485	DNA/P#rnd-1_family-56	19.8	-	0
Rd10x_p_00008	194466	194956	DNA/P#rnd-1_family-56	19.8	+	0
Rd10x_p_00008	212068	212407	DNA/TcMar-Tc1#rnd-5_family-4789	18.572	+	13
Rd10x_p_00008	224475	224552	DNA/TcMar-Tc1#rnd-1_family-218	19.5	-	0
Rd10x_p_00008	230348	230799	DNA/TcMar-Tc1#rnd-5_family-338	23.1	+	0
Rd10x_p_00008	248733	248896	DNA/Kolobok#Kolobok2_Av	31.3	+	0
Rd10x_p_00008	267420	267809	DNA/hAT-Ac#rnd-5_family-5936	15.2	+	6
Rd10x_p_00008	270124	270285	DNA/hAT-hobo#rnd-1_family-408	13.6	+	3
Rd10x_p_00008	273339	274234	DNA/TcMar-Mariner#rnd-4_family-2342	21.5	-	0
Rd10x_p_00008	276502	276984	LINE/CR1#CR1-18_HRo	31.3	+	713
Rd10x_p_00008	276931	277019	LTR/Gypsy#Gypsy-35_CQ-I	18.6	+	161
Rd10x_p_00008	278888	278955	DNA/hAT-Blackjack#hAT-4_PBa	22.4	+	1063
Rd10x_p_00008	278912	279002	LTR/Gypsy#Gypsy68-I_AG	21.1	-	1138
Rd10x_p_00008	279095	279135	DNA/Maverick#Polinton-8_NVi	19.5	+	627
Rd10x_p_00008	283419	283482	DNA/PIF-Spy#ISL2EU-17_CGi	19.4	+	1
Rd10x_p_00008	302466	302648	DNA/hAT-hobo#rnd-5_family-389	8.3	-	0
Rd10x_p_00008	308934	309045	DNA/P#rnd-1_family-56	24.1	-	0
Rd10x_p_00008	314785	314852	DNA/Kolobok-T2?#Kolobok-N1_AEc	29.4	-	15
Rd10x_p_00008	314809	314860	LINE/L2#L2-8_NVi	11.2	-	15
Rd10x_p_00008	321927	322271	DNA/PiggyBac#piggyBac5_Av	25	+	0
Rd10x_p_00008	336385	336549	DNA/TcMar-Tc1#rnd-5_family-4789	27.6	+	6
Rd10x_p_00008	339393	339486	DNA/PiggyBac#rnd-6_family-5750	18.3	-	12
Rd10x_p_00008	349381	349622	DNA/TcMar-Tc1#Tc19_Av	24.7	+	2
Rd10x_p_00008	351168	351368	DNA/PiggyBac#rnd-5_family-2943	22.9	+	5
Rd10x_p_00008	360713	360831	LINE/Soliton#Soliton6a_Av	20.7	+	14
Rd10x_p_00008	368662	368854	DNA/PiggyBac#rnd-1_family-348	14.6	-	0
Rd10x_p_00008	370492	370661	LTR/Unknown#ltr-1_family-8	21.4	-	0
Rd10x_p_00008	378209	378282	DNA/RC#Helitron-7_NVi	26	+	0
Rd10x_p_00008	378806	378926	DNA/PiggyBac-PB#AvPB3	38	-	0
Rd10x_p_00008	391210	392247	DNA/hAT-hobo#rnd-5_family-389	12.876	-	0
Rd10x_p_00008	393607	393977	DNA/MULE-MuDR#MuDR4_Av	29.449	+	0
Rd10x_p_00008	407555	407605	LTR/Juno-Vesta#Vesta3_Av	18	+	31
Rd10x_p_00008	424101	424172	PLE/Penelope#rnd-5_family-2837	26.4	-	10
Rd10x_p_00008	435493	435530	PLE/Penelope-Athena#AthW2-1	2.7	+	57
Rd10x_p_00008	441702	441915	DNA/hAT-hobo#rnd-1_family-408	16	+	4
Rd10x_p_00008	467587	467789	DNA/hAT-hobo#rnd-1_family-408	14.8	+	5
Rd10x_p_00008	468043	468104	DNA/hAT-hobo#rnd-5_family-389	16.4	+	5
Rd10x_p_00008	485271	485337	DNA/Sola-3#DNA4-26_CGi	14	+	0
Rd10x_p_00008	491911	491978	DNA/MULE-MuDR#MuDR5_Av	30.9	-	0
Rd10x_p_00008	498783	499087	DNA/hAT#hAT23_Av	34.4	+	1
Rd10x_p_00008	550635	551221	LINE/I#rnd-5_family-3886	27.9	+	2
Rd10x_p_00008	551511	551566	LINE/Soliton#Soliton2_Av	7.3	+	0
Rd10x_p_00008	560358	560400	DNA/hAT-hobo#rnd-6_family-4984	16.3	+	2
Rd10x_p_00008	579235	579372	DNA#rnd-6_family-4969	9.6	-	32
Rd10x_p_00008	591219	591356	DNA/TcMar-Mariner#rnd-4_family-2342	20.5	+	0
Rd10x_p_00008	591566	591699	DNA/TcMar-Mariner#rnd-4_family-2342	14.4	-	0
Rd10x_p_00008	597926	598156	DNA/TcMar-Tc1#Tc9_Av	33.6	-	0
Rd10x_p_00008	598303	599045	DNA/TcMar-Tc1#Tc8_Av	34.3	-	0
Rd10x_p_00008	599517	599701	DNA/PiggyBac#rnd-6_family-2495	20.2	-	0
Rd10x_p_00008	610735	611070	PLE/Penelope#rnd-5_family-2837	19.6	+	1
Rd10x_p_00008	624094	624192	DNA/TcMar-Pogo#pogo5_Av	33.7	+	0
Rd10x_p_00008	630327	630347	PLE/Penelope-Athena#AthW2-2	24.3	+	4
Rd10x_p_00008	630348	630392	LINE/L2#L2B-4B_AAe	11.1	+	8
Rd10x_p_00008	630363	630414	DNA/Crypton#Crypton-1_CTe	13.5	-	10
Rd10x_p_00008	634714	634776	DNA/TcMar-Tc1#Mariner-101_HSal	27	+	1
Rd10x_p_00008	634738	634796	DNA#DNA-2_LMi	17.2	-	1
Rd10x_p_00008	646544	646868	DNA/TcMar-Tc1#rnd-5_family-4789	25.415	+	14
Rd10x_p_00008	649397	649449	LINE/L1-Tx1#L1-N6_CQ	20.8	+	23
Rd10x_p_00008	653639	654306	DNA/PiggyBac#rnd-1_family-348	15.2	+	0
Rd10x_p_00008	674308	674378	LINE/Soliton#Soliton6b_Av	29.6	-	0
Rd10x_p_00008	674362	674895	LINE/Soliton#Soliton6_Av	30.2	-	0
Rd10x_p_00008	675108	675566	DNA/IS5#IS5_Av	32.3	+	0
Rd10x_p_00008	678081	678378	DNA/TcMar-Tc1#rnd-3_family-532	32.1	-	0
Rd10x_p_00008	679082	679128	DNA/hAT-Ac#Homo8	10.9	+	0
Rd10x_p_00008	682243	682382	LINE/RTE#RTE2a_Av	25.5	-	1
Rd10x_p_00008	685776	685937	DNA/hAT-hobo#rnd-5_family-389	15.4	-	70
Rd10x_p_00008	693951	694053	LINE/CR1#CR1-18_HRo	27.4	-	78
Rd10x_p_00008	702062	702274	DNA/MULE-MuDR#rnd-3_family-112	19.9	+	0
Rd10x_p_00008	702310	702376	DNA/Ginger#Ginger2b_Av	24.2	+	0
Rd10x_p_00008	715006	715860	DNA/TcMar-Tc1#rnd-3_family-532	13.025	-	0
Rd10x_p_00008	715631	716036	DNA/TcMar-Tc1#rnd-3_family-532	16.2	+	0
Rd10x_p_00008	722759	723104	DNA/TcMar-Mariner#Avmar7_Av	25.9	-	3
Rd10x_p_00008	723095	723657	DNA/TcMar-Mariner#rnd-6_family-2886	14.2	-	3
Rd10x_p_00008	724975	725032	LTR/Unknown#ltr-1_family-24	27.6	-	3
Rd10x_p_00008	729768	729804	PLE/Penelope-Athena#AthW2-1	13.5	-	88
Rd10x_p_00008	729776	729862	LINE/L2#L2-2_NVi	20.1	-	111
Rd10x_p_00008	732830	732969	DNA/TcMar-Mariner#rnd-4_family-2345	22.8	-	6
Rd10x_p_00008	744947	745376	LTR/Unknown#ltr-1_family-24	29.6	+	1
Rd10x_p_00008	755141	755286	DNA/TcMar-Mariner#rnd-1_family-446	17.8	+	0
Rd10x_p_00008	755293	755543	DNA/TcMar-Mariner#rnd-1_family-446	29.2	-	0
Rd10x_p_00008	757548	757743	DNA/PiggyBac#rnd-1_family-348	14.4	+	0
Rd10x_p_00008	768067	768126	PLE/Penelope-Athena#AthX-V-T	16.9	-	43
Rd10x_p_00008	780910	785163	LTR/TelKA#TelKA1_Av	31.222	-	176
Rd10x_p_00008	784956	785003	LTR/Unknown#ltr-1_family-9	21.6	-	105
Rd10x_p_00008	790698	790980	DNA/hAT#hAT16_Av	25.6	+	0
Rd10x_p_00008	798289	798464	DNA/hAT-Tip100#rnd-6_family-53	33.6	+	0
Rd10x_p_00008	804804	804867	LINE/I-Jockey#Ag-Jock-1	14.8	-	49
Rd10x_p_00008	804818	804874	LINE/R1#RTAg4	14.8	-	52
Rd10x_p_00008	805555	805781	DNA/P#rnd-1_family-56	15.8	-	1
Rd10x_p_00009	9383	9427	LINE/CR1-Zenon#CR1-8_CGi	24.4	+	0
Rd10x_p_00009	58409	58461	LTR/Gypsy#Gypsy-14_DPu-I	19.6	-	0
Rd10x_p_00009	85408	85468	LTR/Gypsy#ltr-1_family-6	20.7	-	0
Rd10x_p_00009	100107	100174	LINE/CR1#CR1-63_AAe	22.4	+	0
Rd10x_p_00009	122309	122373	DNA/hAT-Ac#Hoana2	23.4	-	0
Rd10x_p_00009	136671	136737	LINE/L2#Daphne-9_LMi	26.9	-	0
Rd10x_p_00009	141144	141192	LTR/Gypsy#Gypsy-43_DWil-I	24.5	-	0
Rd10x_p_00009	148913	148965	DNA/RC#Helitron-N34_CGi	20.1	-	0
Rd10x_p_00009	152325	152413	DNA/Maverick#Polinton-4_NVi	16.3	+	0
Rd10x_p_00009	189584	189619	LTR/Pao#BEL-32_AA-I	8.6	+	0
Rd10x_p_00009	284430	284662	DNA#rnd-6_family-4969	12.1	-	19
Rd10x_p_00009	290538	290720	DNA/TcMar-Tc1#rnd-1_family-218	21.7	+	0
Rd10x_p_00009	290991	291435	DNA/PiggyBac#piggyBac4_Av	25.4	+	1
Rd10x_p_00009	291700	292071	DNA/TcMar-Mariner#rnd-5_family-4115	21.1	-	0
Rd10x_p_00009	302617	302673	LTR/Gypsy#Gypsy-37_NVi-I	22.8	+	42
Rd10x_p_00009	312265	312350	DNA#rnd-6_family-4969	13.9	+	0
Rd10x_p_00009	316213	316438	DNA/hAT-hobo#rnd-1_family-408	11.6	+	0
Rd10x_p_00009	331784	331858	DNA/RC#Helitron-like-6b_Hmel	9.3	-	0
Rd10x_p_00009	331859	331872	DNA/RC#Helitron-like-13_Hmel	11.7	+	0
Rd10x_p_00009	335458	335506	LTR/Pao#ROO_I	22.4	-	150
Rd10x_p_00009	338221	338282	PLE/Penelope-Athena#AthX-V-T	16.2	+	10
Rd10x_p_00009	342598	343618	PLE/Penelope-Athena#AthJ-N-W1	27.1	+	17
Rd10x_p_00009	346094	346237	DNA/hAT-Ac#rnd-5_family-5936	16.9	-	11
Rd10x_p_00009	351292	355542	DNA/RC#Helitron-like-13_Hmel	15.271	+	7
Rd10x_p_00009	354507	354802	LTR/Unknown#ltr-1_family-26	12.6	+	4
Rd10x_p_00009	356011	356114	DNA/RC#Helitron-like-13_Hmel	13.9	+	0
Rd10x_p_00009	362244	362660	DNA/RC#rnd-5_family-12029	25.5	-	21
Rd10x_p_00009	365373	365521	DNA/TcMar-Tc1#rnd-5_family-170	20.3	+	24
Rd10x_p_00009	377270	377316	DNA/RC#Helitron-N21_CGi	14.9	+	0
Rd10x_p_00009	384761	385019	DNA/TcMar-Tc1#rnd-3_family-532	29.9	-	0
Rd10x_p_00009	384891	385255	DNA/TcMar-Tc1#rnd-3_family-532	32.1	+	0
Rd10x_p_00009	386071	386108	PLE/Penelope-Athena#AthK1	15.8	+	1
Rd10x_p_00009	403426	403497	PLE/Penelope#rnd-5_family-2837	18.1	+	13
Rd10x_p_00009	408225	408781	DNA/MULE-MuDR#rnd-6_family-4571	23.6	+	0
Rd10x_p_00009	434629	435160	DNA/TcMar-Mariner#Avmar7_Av	33.8	-	0
Rd10x_p_00009	443974	444130	LINE/Soliton#Soliton7_Av	28.4	+	0
Rd10x_p_00009	449096	449332	DNA/TcMar-Mariner#Avmar5_Av	21.3	-	0
Rd10x_p_00009	472926	473208	DNA/TcMar-Mariner#rnd-4_family-2345	32.4	+	0
Rd10x_p_00009	481801	481840	LINE/RTE-RTE#RTE-21_PPo	20	+	18
Rd10x_p_00009	483103	483294	DNA/hAT-hobo#rnd-1_family-408	13	+	14
Rd10x_p_00009	505641	505758	DNA/hAT#hAT7_Av	31.6	-	9
Rd10x_p_00009	529033	529143	DNA/TcMar-Tc1#Tc5_cons_Av	18.9	+	6
Rd10x_p_00009	529716	529826	DNA/TcMar-Tc1#Tc5_cons_Av	18	-	6
Rd10x_p_00009	535403	535441	DNA/PiggyBac-Uribo#Uribo1_Av	20.5	-	12
Rd10x_p_00009	559198	559266	DNA/TcMar-Tc1#Mariner-16_DF	23.2	+	0
Rd10x_p_00009	560612	561014	DNA/TcMar-Tc1#rnd-3_family-532	33.3	-	0
Rd10x_p_00009	560776	561116	DNA/TcMar-Tc1#rnd-3_family-532	32.5	+	0
Rd10x_p_00009	563288	563945	DNA/TcMar-Mariner#rnd-4_family-2342	21.6	-	0
Rd10x_p_00009	576357	576402	DNA/TcMar-Tc1#rnd-3_family-532	26.7	-	1
Rd10x_p_00009	576738	577076	DNA/TcMar-Tc1#rnd-3_family-532	32.1	+	0
Rd10x_p_00009	578916	579004	LINE/RTE#RTE2a_Av	25.3	+	0
Rd10x_p_00009	586879	587356	DNA/PiggyBac#rnd-6_family-2495	25.168	+	7
Rd10x_p_00009	589779	591994	DNA/TcMar-Mariner#rnd-4_family-2342	24.019	+	3
Rd10x_p_00009	593380	594460	DNA/TcMar-Tc1#rnd-5_family-170	18.545	+	1
Rd10x_p_00009	596188	596269	DNA/PiggyBac#rnd-6_family-2495	24.4	-	9
Rd10x_p_00009	604765	604941	LTR/Copia#Copia17-NVi_I	21.1	+	1
Rd10x_p_00009	604831	604924	LTR/Gypsy#Gypsy-38_NVi-LTR	21.8	+	0
Rd10x_p_00009	604843	604926	DNA/Maverick#Polinton-9_NVi	11	-	0
Rd10x_p_00009	604854	604948	LINE/L1-Tx1#Tx1-1_CGi	13.7	-	0
Rd10x_p_00009	605026	605075	LTR/Gypsy#Gypsy-22_DWil-I	14	+	2
Rd10x_p_00009	637916	638005	LINE/CR1#CR1_Ele27	24.7	+	0
Rd10x_p_00009	666707	666744	LINE/L1#L1_Ele21	15.8	+	0
Rd10x_p_00010	534	1647	LTR/Gypsy#ltr-1_family-6	19.75	+	27
Rd10x_p_00010	3983	4457	DNA/hAT-Ac#rnd-5_family-5936	13.94	+	8
Rd10x_p_00010	15444	15480	PLE/Penelope#rnd-5_family-2837	13.5	+	1
Rd10x_p_00010	25710	26804	LINE/Soliton#Soliton5_Av	34.4	-	4
Rd10x_p_00010	34071	34209	DNA/TcMar-Mariner#rnd-1_family-446	17.1	+	22
Rd10x_p_00010	34270	34612	DNA/TcMar-Mariner#rnd-1_family-446	26	-	22
Rd10x_p_00010	35346	35382	LTR/Gypsy#Gypsy-247_AA-I	10.8	+	34
Rd10x_p_00010	38452	40310	LINE/L2#rnd-5_family-2872	25.4	+	4
Rd10x_p_00010	43615	43674	LTR/Gypsy#YOYO_I	18.6	+	85
Rd10x_p_00010	47336	47391	LTR/Gypsy#Ulysses_LTR	16.1	+	34
Rd10x_p_00010	66625	66742	DNA/TcMar-Tc1#Tc12_Av	22	-	0
Rd10x_p_00010	67770	68014	DNA/RC#rnd-6_family-1268	12.001	+	14
Rd10x_p_00010	76818	77034	DNA/Ginger-1#rnd-6_family-948	29.6	-	0
Rd10x_p_00010	76853	79510	DNA/Ginger-1#rnd-6_family-948	27.763	+	0
Rd10x_p_00010	77237	77711	DNA/TcMar-m44#rnd-6_family-3050	20	-	0
Rd10x_p_00010	78644	78762	DNA/TcMar-m44#rnd-5_family-2209	28.8	-	0
Rd10x_p_00010	81376	81410	LINE/I-Jockey#HeT-A3_DVi	14.3	-	0
Rd10x_p_00010	85025	85083	DNA/Crypton#Crypton-1_CTe	11	+	24
Rd10x_p_00010	85035	85115	DNA/RC#Helitron-9_CGi	22.5	+	22
Rd10x_p_00010	89404	89481	LTR/Gypsy#Gypsy-7_ACe-LTR	21.4	-	2
Rd10x_p_00010	111814	112201	DNA/TcMar-Tc1#rnd-5_family-338	22.6	+	7
Rd10x_p_00010	112202	112317	DNA/TcMar-Tc1#rnd-5_family-337	32	-	8
Rd10x_p_00010	115807	115932	DNA/TcMar-Tc1#rnd-5_family-338	21.6	-	1
Rd10x_p_00010	115906	116084	DNA/TcMar-Tc1#rnd-6_family-8023	19.7	+	1
Rd10x_p_00010	115926	116092	DNA/TcMar-Tc1#rnd-6_family-1328	14.4	-	1
Rd10x_p_00010	122446	122776	DNA/MULE-MuDR#rnd-3_family-112	24.1	-	6
Rd10x_p_00010	126920	127033	PLE/Penelope#rnd-5_family-5596	29.5	-	1
Rd10x_p_00010	178626	178959	LINE/RTE-BovB#rnd-6_family-5002	29.5	+	0
Rd10x_p_00010	179018	179474	LTR/Unknown#ltr-1_family-24	30.7	-	0
Rd10x_p_00010	181141	181305	LTR/Unknown#ltr-1_family-24	30.3	+	0
Rd10x_p_00010	193249	193303	DNA/RC#Heli3_Av	23.6	+	0
Rd10x_p_00010	199120	200466	DNA/MULE-MuDR#rnd-3_family-112	17.459	-	3
Rd10x_p_00010	200548	200854	DNA/Sola#Sola2h_Av	31.7	-	0
Rd10x_p_00010	203720	203919	DNA/TcMar-m44#rnd-5_family-974	23.7	-	1
Rd10x_p_00010	204091	204364	DNA/TcMar-m44#rnd-5_family-974	28.2	+	2
Rd10x_p_00010	209187	209261	LTR/Gypsy#Gypsy-2_DVir-I	19.8	-	9
Rd10x_p_00010	213590	214038	LTR/Unknown#ltr-1_family-24	25.9	+	18
Rd10x_p_00010	218535	218961	DNA/TcMar-Tc1#rnd-5_family-338	24.8	-	0
Rd10x_p_00010	221240	222169	PLE/Penelope#rnd-5_family-2837	16.778	+	0
Rd10x_p_00010	221281	221397	DNA/CMC-EnSpm#EnSpm5_Av	24.8	+	0
Rd10x_p_00010	221403	221733	DNA/TcMar-m44#rnd-5_family-974	23.4	+	0
Rd10x_p_00010	239393	239439	PLE/Penelope-Athena#AthW-J	9.4	-	41
Rd10x_p_00010	241140	241219	DNA/PIF-Harbinger#DNA3-13B_CGi	26	+	34
Rd10x_p_00010	241196	241261	DNA/TcMar-Fot1#Mariner-24_CGi	14.5	+	33
Rd10x_p_00010	242285	242355	PLE/Penelope-Athena#AthW	21.4	+	44
Rd10x_p_00010	248167	248426	DNA/RC#rnd-1_family-394	3.9	-	1
Rd10x_p_00010	248754	249007	DNA/PIF-Spy#rnd-5_family-4741	30.3	+	0
Rd10x_p_00010	268820	268881	DNA/PiggyBac-PB#AvPB4	16.6	-	18
Rd10x_p_00010	268882	268902	LTR/Gypsy#Gypsy8-I_Dpse	30.9	-	17
Rd10x_p_00010	269561	269722	LINE/CR1#CR1-2_CQ	23.4	-	48
Rd10x_p_00010	282863	286703	LTR/Gypsy#ltr-1_family-31	32.077	-	2
Rd10x_p_00010	283130	286378	LTR/Juno-Vesta#Vesta1b_Av	31.088	-	2
Rd10x_p_00010	285719	285949	LTR/Unknown#ltr-1_family-1	7.4	-	2
Rd10x_p_00010	295328	296291	DNA/TcMar-Mariner#Avmar5_Av	25.4	+	5
Rd10x_p_00010	296299	296399	DNA/TcMar-Tc1#rnd-3_family-532	20.2	+	5
Rd10x_p_00010	305439	305972	DNA/hAT-Ac#rnd-5_family-5936	17.335	+	4
Rd10x_p_00010	314695	314875	DNA/TcMar-Tc1#rnd-5_family-2772	29.8	-	0
Rd10x_p_00010	325678	325711	DNA/RC#rnd-1_family-394	8.8	-	0
Rd10x_p_00010	327049	327106	DNA/hAT-Blackjack#hAT-12_LMi	22.8	+	26
Rd10x_p_00010	329694	329890	DNA/TcMar-Tc1#rnd-1_family-508	16.6	+	0
Rd10x_p_00010	331528	331607	DNA/hAT-Charlie#hAT-11_HRo	21.5	+	15
Rd10x_p_00010	339121	339162	DNA/Sola#Sola2h_Av	31	+	1
Rd10x_p_00010	378072	378170	LTR/Gypsy#Gypsy-24_DEl-I	13.1	+	48
Rd10x_p_00010	395975	396658	LINE#rnd-5_family-3949	16.743	-	0
Rd10x_p_00010	399410	399462	LTR/Juno-Vesta#Vesta5_Av	9.8	-	13
Rd10x_p_00010	405054	405110	DNA/Zator#Zator-2_CGi	10.4	-	0
Rd10x_p_00010	416159	416714	DNA/TcMar-Mariner#rnd-6_family-2886	28.6	-	95
Rd10x_p_00010	423214	423839	DNA/PiggyBac#rnd-5_family-7055	24.323	-	2
Rd10x_p_00010	453592	453939	DNA/TcMar-Tc1#rnd-3_family-532	32.1	-	1
Rd10x_p_00010	453705	454096	DNA/TcMar-Tc1#rnd-3_family-532	29.1	+	1
Rd10x_p_00010	461576	461751	DNA/TcMar-Tc4#rnd-5_family-105	18.2	+	1
Rd10x_p_00010	487474	487772	DNA/TcMar-Tc4#rnd-5_family-335	27	-	0
Rd10x_p_00010	487564	488744	DNA/TcMar-Tc4#rnd-5_family-335	26.051	+	0
Rd10x_p_00010	489893	489986	DNA/TcMar-Tc1#rnd-5_family-338	18.1	+	0
Rd10x_p_00010	489986	490475	DNA/TcMar-Tc1#rnd-1_family-559	27.3	-	0
Rd10x_p_00010	490494	490929	DNA/TcMar-Tc1#Tc21_Av	32.6	+	0
Rd10x_p_00010	490932	491294	DNA/TcMar-Tc1#rnd-5_family-338	20.2	+	0
Rd10x_p_00010	494942	495518	DNA/PiggyBac#piggyBac6_Av	9.711	+	0
Rd10x_p_00010	511514	511578	DNA/RC#Helitron-7N1_CGi	17.5	+	1
Rd10x_p_00010	517662	518019	DNA/TcMar-Tc1#rnd-3_family-532	32.1	-	0
Rd10x_p_00010	517789	518182	DNA/TcMar-Tc1#rnd-3_family-532	29.4	+	0
Rd10x_p_00010	520607	521800	DNA/TcMar-Mariner#Avmar7_Av	27.4	-	0
Rd10x_p_00010	521984	522059	DNA/hAT-Ac#rnd-6_family-6382	14.5	-	0
Rd10x_p_00010	522036	522346	DNA#rnd-6_family-4969	13.4	+	0
Rd10x_p_00010	532564	532629	DNA#DNA-11_CGi	22.7	-	13
Rd10x_p_00010	537628	537849	DNA/RC#rnd-1_family-394	19.8	+	1
Rd10x_p_00010	548186	548323	DNA/P#rnd-1_family-56	24.4	-	4
Rd10x_p_00010	548795	549189	DNA/TcMar-Tc1#rnd-5_family-4404	28.2	-	4
Rd10x_p_00010	549017	549372	DNA/P#rnd-1_family-56	23.9	+	4
Rd10x_p_00010	568290	568370	DNA/PiggyBac#piggyBac9_Av	28.4	-	0
Rd10x_p_00010	573215	573292	DNA/Maverick#Polinton-1_DPe	18.7	+	1
Rd10x_p_00010	584730	584784	DNA/hAT-Ac#rnd-6_family-6382	12.7	-	0
Rd10x_p_00010	592878	593116	DNA/TcMar-Tc1#rnd-3_family-532	28.1	+	3
Rd10x_p_00010	623830	624040	DNA/hAT-hobo#rnd-1_family-408	13.3	-	0
Rd10x_p_00010	630122	630304	DNA/MULE-MuDR#rnd-3_family-112	26.7	-	7
Rd10x_p_00010	645922	646360	DNA/hAT-hobo#rnd-5_family-389	10.8	-	0
Rd10x_p_00010	646361	646506	DNA/hAT#hAT6_Av	30	-	0
Rd10x_p_00010	667387	667775	DNA/TcMar-Tc1#rnd-5_family-4789	23.4	-	1
Rd10x_p_00010	686853	686922	DNA/TcMar-Mariner#Avmar7_Av	25.7	-	2
Rd10x_p_00010	690687	690729	PLE/Penelope-Athena#AthK-V	4.8	-	1
Rd10x_p_00010	695794	695846	LINE/RTE-X#RTEX-14_CGi	20.8	-	0
Rd10x_p_00010	696149	696216	DNA#DNA4-6_CGi	23.9	+	0
Rd10x_p_00010	703893	703933	LINE/L2#L2-8_NVi	9.8	-	18
Rd10x_p_00010	712578	712656	DNA/PiggyBac#rnd-6_family-4296	11.4	-	0
Rd10x_p_00010	712676	712812	DNA/PiggyBac-Pokey#Pokey3_Av	23.4	-	0
Rd10x_p_00010	723129	723264	PLE/Penelope-Athena#AthX-V-T	24	+	73
Rd10x_p_00010	732010	732542	DNA/CMC-EnSpm#rnd-6_family-6087	24.5	+	20
Rd10x_p_00010	732618	732851	DNA/TcMar-m44#rnd-5_family-974	18.4	-	8
Rd10x_p_00010	735436	736809	PLE/Penelope-Athena#AthJ-N-W1	27.764	-	2
Rd10x_p_00010	742435	742532	DNA/hAT-hobo#rnd-5_family-389	13.3	+	10
Rd10x_p_00011	24932	25048	DNA/hAT-Tip100#rnd-6_family-53	25.7	-	0
Rd10x_p_00011	28266	28353	LINE/RTE#RTE2a_Av	19.3	-	0
Rd10x_p_00011	56512	56767	DNA/P#rnd-1_family-56	21.3	-	7
Rd10x_p_00011	56750	57110	DNA/P#rnd-1_family-56	16.9	+	6
Rd10x_p_00011	75126	75229	PLE/Penelope#Penelope-5_HRo	26.9	+	1
Rd10x_p_00011	75223	75265	DNA/Crypton#Crypton-1_CTe	23.1	+	1
Rd10x_p_00011	80762	80798	DNA/hAT#hAT8_Av	16.2	-	22
Rd10x_p_00011	91229	91379	DNA/Kolobok#Kolobok2_Av	27.1	-	0
Rd10x_p_00011	101363	101640	PLE/Penelope#rnd-5_family-2837	22.7	+	0
Rd10x_p_00011	101897	101938	LINE/L1#L1-47_LSal	11.9	-	0
Rd10x_p_00011	108083	108213	DNA/hAT#hAT20_Av	23.8	-	0
Rd10x_p_00011	113146	113215	DNA/Ginger-1#rnd-6_family-948	27.1	+	1
Rd10x_p_00011	113313	113599	LTR/Unknown#ltr-1_family-24	30.1	+	2
Rd10x_p_00011	123216	123274	DNA/P#P2_Av	15.5	-	3
Rd10x_p_00011	134284	134395	DNA/PiggyBac#rnd-5_family-7055	25.5	+	6
Rd10x_p_00011	134398	134540	DNA/PiggyBac#rnd-5_family-7055	22.9	-	14
Rd10x_p_00011	136536	136603	DNA/PiggyBac#piggyBac2_Av	19.7	-	9
Rd10x_p_00011	140499	140625	DNA/PiggyBac#piggyBac2_Av	34.4	+	18
Rd10x_p_00011	148021	148395	DNA/TcMar-Tc1#rnd-1_family-559	31.2	+	2
Rd10x_p_00011	167358	168447	LTR/Juno-Vesta#Juno1_Av	26.997	+	0
Rd10x_p_00011	168616	168672	DNA/RC#Heli2_Av_cons	22.8	+	0
Rd10x_p_00011	176684	176727	LTR/Pao#BEL4-I_AP	25	-	27
Rd10x_p_00011	187453	188574	DNA/TcMar-Mariner#rnd-4_family-2345	28.1	-	0
Rd10x_p_00011	206789	206850	LTR/Gypsy#Gypsy3-LTR_AP	12.1	+	22
Rd10x_p_00011	218353	218401	DNA#DNA8-12_CB	18.4	+	14
Rd10x_p_00011	258014	258135	DNA/PiggyBac#piggyBac2_Av	24.3	-	9
Rd10x_p_00011	282547	282593	DNA/Ginger#Ginger2d_Av	23.4	-	0
Rd10x_p_00011	286198	286310	DNA/MULE-MuDR#rnd-4_family-2201	25.7	+	0
Rd10x_p_00011	288949	288992	PLE/Penelope#rnd-5_family-2837	15.9	-	0
Rd10x_p_00011	333480	333510	DNA/Maverick#Polinton-1_DEu	6.5	-	13
Rd10x_p_00011	339191	339247	DNA/RC#Helitron-3N1_NVi	15.8	+	7
Rd10x_p_00011	339201	339252	LINE/L2#L2-8_NVi	11.5	-	7
Rd10x_p_00011	339204	339270	DNA/P#Galileo_DM	24.2	-	10
Rd10x_p_00011	340201	340245	DNA/Kolobok-T2#Kolobok-1_CB	17.8	-	41
Rd10x_p_00011	347240	347284	DNA/Maverick#Polinton-1_NVi	13.3	+	2
Rd10x_p_00011	360192	360331	DNA/TcMar-Tc1#Tc19_Av	21.6	-	10
Rd10x_p_00011	379922	380101	DNA/TcMar-Tc1#rnd-6_family-6000	24.2	-	0
Rd10x_p_00011	381537	381811	DNA/TcMar-Mariner#rnd-4_family-2342	29.9	+	0
Rd10x_p_00011	386020	386158	DNA/MULE-MuDR#rnd-6_family-4571	18.4	+	16
Rd10x_p_00011	388009	388232	DNA/hAT-hobo#rnd-1_family-408	14.5	-	3
Rd10x_p_00011	391147	391810	DNA/Sola#Sola2d_Av	30.5	+	0
Rd10x_p_00011	393387	393477	DNA/Sola-2#Sola2-N1_CQ	15.5	+	4
Rd10x_p_00011	413398	414879	DNA/TcMar-Tc1#rnd-3_family-532	23.606	-	0
Rd10x_p_00011	414881	415154	DNA/TcMar-Tc1#rnd-3_family-532	20	-	0
Rd10x_p_00011	414925	415296	DNA/TcMar-Tc1#rnd-3_family-532	17.1	+	0
Rd10x_p_00011	437025	437187	LINE/RTE-BovB#rnd-6_family-5002	28.1	+	0
Rd10x_p_00011	441192	441232	LINE/CR1#CR1-16_HRo	12.2	+	0
Rd10x_p_00011	441222	442157	DNA/TcMar-Mariner#rnd-5_family-4115	29.4	-	0
Rd10x_p_00011	441233	441249	PLE/Penelope#Penelope-5_HRo	19.3	-	0
Rd10x_p_00011	443473	443571	PLE/Penelope#Penelope-9_HRo	26.3	-	79
Rd10x_p_00011	445663	445776	DNA/Kolobok-T2?#Kolobok-N1_AEc	28.5	-	1
Rd10x_p_00011	459438	459695	DNA#rnd-6_family-4969	13.8	-	2
Rd10x_p_00011	459673	459742	DNA/hAT-Ac#rnd-6_family-6382	22.9	+	2
Rd10x_p_00011	469675	469892	DNA/hAT-hobo#rnd-1_family-408	20.7	+	0
Rd10x_p_00011	480983	481377	DNA/hAT#hAT8_Av	24.28	+	22
Rd10x_p_00011	481233	481278	DNA/hAT-Ac#rnd-5_family-7341	30.3	+	22
Rd10x_p_00011	481248	481350	DNA/hAT-Ac#rnd-5_family-7341	29.6	-	22
Rd10x_p_00011	494392	494446	PLE/Penelope-Athena#AthW1-J-R	21.8	+	11
Rd10x_p_00011	502291	503353	DNA/MULE-MuDR#DNA9-2_AAe	24.781	-	0
Rd10x_p_00011	502782	502866	DNA/MULE-MuDR#rnd-6_family-9445	14.7	-	0
Rd10x_p_00011	504250	504441	DNA/TcMar-Tc1#rnd-1_family-218	24.5	-	0
Rd10x_p_00011	520469	520530	LINE/CR1#CR1-18_HRo	15.3	-	4
Rd10x_p_00011	554287	554419	LINE/CR1#CR1-18_HRo	21.3	-	39
Rd10x_p_00011	583231	583302	LTR/Copia#Copia-1_DGri-I	21.7	+	5
Rd10x_p_00011	583627	583735	DNA/TcMar-Tc1#Tc5_cons_Av	23.9	+	5
Rd10x_p_00011	584296	584404	DNA/TcMar-Tc1#Tc5_cons_Av	22	-	5
Rd10x_p_00011	589677	589718	LTR/Gypsy#Gypsy-10_DVir-LTR	11.9	+	29
Rd10x_p_00011	602223	602501	DNA/MULE-MuDR#rnd-3_family-112	18.43	+	17
Rd10x_p_00011	602612	602692	DNA/MULE-MuDR#rnd-3_family-112	11.5	-	17
Rd10x_p_00011	603778	603960	DNA/PiggyBac#piggyBac9_Av	18.9	-	28
Rd10x_p_00011	628900	628937	DNA/TcMar-Tc1#Mariner-4_LHu	13.2	-	52
Rd10x_p_00011	632536	632763	DNA/RC#rnd-1_family-394	15.5	-	0
Rd10x_p_00011	642437	642640	DNA/CMC-EnSpm#CACTA8_Av	26.4	+	4
Rd10x_p_00011	643179	643403	DNA#rnd-6_family-4969	12.1	+	0
Rd10x_p_00011	644085	644149	DNA#rnd-6_family-4969	12.5	+	1
Rd10x_p_00011	647054	647615	DNA/MULE-MuDR#rnd-6_family-157	20.831	-	0
Rd10x_p_00011	658418	658812	DNA/TcMar-Mariner#Avmar5_Av	23.5	-	29
Rd10x_p_00011	658869	658949	DNA/TcMar-Mariner#Avmar5a_Av	16.1	-	30
Rd10x_p_00011	670788	670920	DNA/hAT#hAT11_Av	21.8	+	0
Rd10x_p_00011	670795	670835	DNA/hAT#hAT11_Av	24.4	-	0
Rd10x_p_00011	670836	670932	PLE/Penelope-Athena#AthP1	26.3	-	1
Rd10x_p_00011	673336	673392	LTR/Pao#BEL-649_AA-I	20.9	+	12
Rd10x_p_00011	684436	684517	LTR/Gypsy#Gypsy68-I_AG	25.4	+	32
Rd10x_p_00011	684447	684536	DNA/hAT-Tip100#hAT-15_HRo	14.2	+	32
Rd10x_p_00011	684479	684555	DNA/Sola-2#Sola2-4_LMi	26.3	+	33
Rd10x_p_00011	695451	695716	DNA/MULE-MuDR#rnd-3_family-112	20.2	+	2
Rd10x_p_00011	695752	695818	DNA/Ginger#Ginger2b_Av	22.7	+	0
Rd10x_p_00011	696044	696082	DNA/MULE-MuDR#rnd-6_family-8443	2.6	-	0
Rd10x_p_00011	697778	699400	LINE/RTE#RTE2a_Av	28.886	+	0
Rd10x_p_00011	699405	699714	DNA/TcMar-Mariner#rnd-1_family-467	19.2	-	0
Rd10x_p_00011	699715	699744	DNA/TcMar-Mariner#Avmar1a_Av	10.6	+	0
Rd10x_p_00012	15004	15094	DNA/P#rnd-1_family-56	16.6	-	6
Rd10x_p_00012	17838	18082	DNA/TcMar-Tc1#rnd-3_family-532	31.4	-	0
Rd10x_p_00012	19288	19596	LTR/Unknown#ltr-1_family-26	15.6	+	13
Rd10x_p_00012	28379	28478	DNA/hAT-Tip100#rnd-5_family-803	17	-	0
Rd10x_p_00012	28549	29823	LINE/I#rnd-5_family-3886	24.105	+	14
Rd10x_p_00012	36620	36655	PLE/Penelope#rnd-6_family-4623	8.3	-	24
Rd10x_p_00012	41373	41428	DNA/hAT#hAT19_Av	19.6	-	0
Rd10x_p_00012	47959	48031	LINE/CR1#CR1_Ele30	17.4	-	15
Rd10x_p_00012	57255	57333	DNA/P#rnd-1_family-56	20.8	-	18
Rd10x_p_00012	68801	69031	DNA/TcMar-Tc1#rnd-5_family-337	13.543	+	39
Rd10x_p_00012	80542	80625	DNA/TcMar-Mariner#rnd-4_family-2345	16.9	-	17
Rd10x_p_00012	107026	107137	DNA/PiggyBac-Uribo#Uribo1_Av	17.9	-	0
Rd10x_p_00012	107039	107185	DNA/PiggyBac#rnd-1_family-581	16.4	-	0
Rd10x_p_00012	108243	108820	DNA/Kolobok#Kolobok2_Av	29.6	+	0
Rd10x_p_00012	123239	123343	DNA/P#rnd-1_family-56	23.3	+	0
Rd10x_p_00012	124906	125037	DNA/hAT#hAT25_Av	24.6	-	9
Rd10x_p_00012	145778	145998	DNA/hAT-hobo#rnd-1_family-408	12.7	-	1
Rd10x_p_00012	154167	154337	DNA/MULE-MuDR#rnd-6_family-9445	26.8	+	2
Rd10x_p_00012	156187	156280	DNA/TcMar-Mariner#Mariner-46_HSal	23.5	-	14
Rd10x_p_00012	156299	156786	DNA/TcMar-Mariner#Mariner-42_HSal	31.9	-	16
Rd10x_p_00012	162053	162248	DNA/TcMar-m44#rnd-5_family-2209	21.4	-	5
Rd10x_p_00012	164130	164259	DNA/MULE-MuDR#MuDR1_Av	30.5	-	2
Rd10x_p_00012	172839	173397	DNA/Ginger#Ginger2c_Av	28.05	-	3
Rd10x_p_00012	179020	179240	DNA/hAT-hobo#rnd-1_family-408	19.6	+	3
Rd10x_p_00012	234606	234721	DNA/TcMar-Tc1#rnd-5_family-337	32.4	+	0
Rd10x_p_00012	234722	235006	DNA/TcMar-Tc1#rnd-6_family-1328	9.2	-	0
Rd10x_p_00012	240935	241038	DNA/TcMar-Tc1#rnd-5_family-153	14.4	-	0
Rd10x_p_00012	269345	269507	DNA/P#rnd-1_family-56	21	-	0
Rd10x_p_00012	383580	383709	LINE/R1#R1_DYa	34.6	-	0
Rd10x_p_00012	491386	491433	LTR/Gypsy#Gypsy-291_AA-I	16.7	-	0
Rd10x_p_00012	531159	531225	LTR/Gypsy#Gypsy-35_CGi-I	22.7	+	0
Rd10x_p_00012	559687	559731	DNA/PiggyBac#piggyBac-28_LMi	9.3	-	0
Rd10x_p_00012	578160	578272	LTR/Gypsy#Gypsy8-I_Dpse	24.1	-	0
Rd10x_p_00012	584051	584104	LTR/Gypsy#Gypsy-26_LMi-I	22.2	-	0
Rd10x_p_00012	603477	603509	LINE/R1#TRAS-3_TUr	9.1	-	0
Rd10x_p_00012	681346	681381	DNA/TcMar-Mariner#Mariner-4_HSal	13.9	+	0
Rd10x_p_00013	1945	2063	DNA/TcMar-Pogo#pogo9_Av	29.4	+	0
Rd10x_p_00013	2440	2561	DNA/TcMar-Pogo#pogo8_Av	26.2	-	0
Rd10x_p_00013	13813	13892	DNA/Crypton#Crypton_Av	21.8	+	14
Rd10x_p_00013	13835	13850	DNA/RC#Helitron-9_CGi	13.8	+	12
Rd10x_p_00013	13851	13888	LTR/Gypsy#Gypsy37-I_AG	10.5	+	13
Rd10x_p_00013	17751	17971	DNA/hAT-hobo#rnd-1_family-408	16.4	-	6
Rd10x_p_00013	29957	30114	DNA/TcMar-Mariner#rnd-4_family-2342	21.9	+	12
Rd10x_p_00013	30333	30523	DNA/TcMar-Mariner#rnd-4_family-2342	24.3	-	13
Rd10x_p_00013	30492	30565	DNA/RC#Helitron-3N1_NVi	17.8	+	12
Rd10x_p_00013	33499	33608	DNA/RC#rnd-1_family-394	25.7	+	0
Rd10x_p_00013	48530	49847	DNA/TcMar-Tc1#rnd-1_family-559	29.2	-	29
Rd10x_p_00013	48655	49671	DNA/TcMar-Tc1#rnd-5_family-4789	19.716	+	29
Rd10x_p_00013	56821	57156	DNA/Kolobok#Kolobok4_Av	34	-	0
Rd10x_p_00013	88753	88950	DNA/TcMar-Tc1#rnd-1_family-559	31.8	+	30
Rd10x_p_00013	91408	91470	DNA/hAT-Ac#rnd-6_family-6382	19.4	-	57
Rd10x_p_00013	104523	104966	LINE/CR1#CR1-2_CQ	27.1	-	6
Rd10x_p_00013	104587	105388	LINE/I-Jockey#TART_DV	25	-	10
Rd10x_p_00013	104685	105722	LINE/R1#RTAg4	33.6	-	11
Rd10x_p_00013	109243	109323	LTR/Unknown#ltr-1_family-24	32.6	-	0
Rd10x_p_00013	110212	110299	LTR/Unknown#ltr-1_family-24	26.1	+	0
Rd10x_p_00013	111214	111312	DNA/TcMar-Tc1#rnd-6_family-6000	26.3	+	0
Rd10x_p_00013	124959	125080	DNA/hAT#hAT7_Av	19.3	+	0
Rd10x_p_00013	160024	160209	DNA/hAT#hAT23_Av	27	+	0
Rd10x_p_00013	162310	162576	DNA/TcMar-Mariner#Avmar7_Av	35.6	-	0
Rd10x_p_00013	196338	196387	DNA/MULE-MuDR#rnd-4_family-2201	20	+	26
Rd10x_p_00013	223749	223801	DNA/hAT-Blackjack#hAT-4_PBa	15.7	-	4
Rd10x_p_00013	231074	231152	DNA/CMC-Chapaev#DNA-5_AAe	11.8	-	14
Rd10x_p_00013	234884	235059	LTR/Unknown#ltr-1_family-24	30.3	+	16
Rd10x_p_00013	243967	244144	DNA/PiggyBac#piggyBac7_Av	32.2	-	0
Rd10x_p_00013	264780	265003	DNA/PiggyBac-Looper#Looper4_Av	35.3	-	1
Rd10x_p_00013	265538	265605	DNA#DNA2-7_CGi	17.9	+	19
Rd10x_p_00013	270814	270873	DNA/hAT-Tip100#hAT-6_HRo	16.7	+	9
Rd10x_p_00013	298770	298863	PLE/Penelope-Athena#AthV-L1	13	-	168
Rd10x_p_00013	298812	298906	LINE/R1#RT1	22.1	-	146
Rd10x_p_00013	299109	302158	DNA/Zator#Zator1_Av	25.68	-	1025
Rd10x_p_00013	299251	301646	DNA/Zator#Zator2_Av	23.906	-	718
Rd10x_p_00013	304566	304622	DNA/CMC-Chapaev#Chapaev-2_CE	19.6	-	0
Rd10x_p_00013	305113	305354	DNA/RC#rnd-1_family-394	18.3	-	0
Rd10x_p_00013	307249	307818	DNA/TcMar-Tc1#Tc19_Av	25.8	-	0
Rd10x_p_00013	311752	311939	DNA/TcMar-m44#rnd-5_family-974	33.9	-	0
Rd10x_p_00013	312314	313201	DNA/TcMar-m44#rnd-5_family-2209	30.265	-	0
Rd10x_p_00013	314485	314675	DNA/TcMar-Tc1#rnd-5_family-227	24.2	+	0
Rd10x_p_00013	314677	315967	DNA/TcMar-Tc1#rnd-5_family-153	7.6	+	0
Rd10x_p_00013	323364	323721	DNA/TcMar-Tc1#rnd-3_family-532	31.5	-	12
Rd10x_p_00013	325175	325238	DNA/TcMar-Mariner#rnd-6_family-7637	27.8	-	10
Rd10x_p_00013	338581	338853	DNA/Ginger-1#rnd-6_family-948	30.4	-	0
Rd10x_p_00013	357042	357400	DNA/PIF-ISL2EU#ISL2EU2_Av	28.1	+	0
Rd10x_p_00013	357642	358055	DNA/PIF-ISL2EU#ISL2EU2_Av	26.8	-	0
Rd10x_p_00013	361688	361734	LINE/CR1#CR1_Ele12	8.9	+	16
Rd10x_p_00013	364464	364511	PLE/Penelope-Athena#AthX-V-T	18.8	+	96
Rd10x_p_00013	366132	366209	DNA/MULE-MuDR#rnd-6_family-1219	20.5	-	75
Rd10x_p_00013	396620	396660	LTR/Copia#Copia-111_AA-I	19.5	+	25
Rd10x_p_00013	418098	418677	DNA/PiggyBac#rnd-5_family-2943	14.2	+	0
Rd10x_p_00013	418926	419083	DNA/hAT-hobo#rnd-5_family-429	21.4	-	0
Rd10x_p_00013	427301	427357	DNA/RC#Helitron-9_CGi	17.5	-	47
Rd10x_p_00013	428408	428458	PLE/Penelope-Athena#AthW2-1	16	-	29
Rd10x_p_00013	428431	428475	PLE/Penelope-Athena#AthX-V-T	13.3	-	30
Rd10x_p_00013	430964	432231	DNA/hAT-Ac#rnd-6_family-6382	14.707	-	27
Rd10x_p_00013	450100	450177	LINE/R1#RTAg4	28.2	+	0
Rd10x_p_00013	466128	466254	DNA/Merlin#Merlin4_Av	24.4	-	21
Rd10x_p_00013	476136	476189	DNA/hAT-hobo#rnd-6_family-4984	16.7	+	14
Rd10x_p_00013	494313	494369	LINE/I-Jockey#DOC3_DM	15.9	-	19
Rd10x_p_00013	502336	502803	DNA/hAT-Ac#rnd-5_family-5936	15.6	-	4
Rd10x_p_00013	511381	512068	DNA/TcMar-Tc1#rnd-3_family-532	29.1	+	5
Rd10x_p_00013	522759	522828	LTR/Pao#BEL-15_CGi-I	18.6	-	0
Rd10x_p_00013	527632	527682	LINE/L2#L2-8_NVi	11.8	+	2
Rd10x_p_00013	527641	527683	DNA/hAT-Tip100#hAT-15_HRo	4.7	-	1
Rd10x_p_00013	528823	528897	LTR/Gypsy#Gypsy6-NVi_LTR	16.2	+	46
Rd10x_p_00013	528841	528933	LTR/Gypsy#Gypsy68-I_AG	20.9	-	41
Rd10x_p_00013	532975	533269	DNA/RC#rnd-1_family-394	16	+	0
Rd10x_p_00013	546899	546935	DNA/Crypton-V#CryptonV-12_CFl	16.2	-	0
Rd10x_p_00013	549161	549208	PLE/Penelope#Penelope-5_HRo	16.7	+	82
Rd10x_p_00013	551280	551353	PLE/Penelope#Penelope-5_HRo	23	+	55
Rd10x_p_00013	551304	551401	DNA/RC#Helitron-9_CGi	17.9	+	52
Rd10x_p_00013	552989	553083	DNA/TcMar-Tc1#rnd-5_family-2772	26.1	-	10
Rd10x_p_00013	558687	558732	LINE/I-Jockey#Ag-Jock-1	21.7	+	10
Rd10x_p_00013	564821	564880	PLE/Penelope-Athena#AthW1	21.7	-	18
Rd10x_p_00013	571690	571753	LINE/L2#Kiri-4_CQ	18.4	-	1
Rd10x_p_00013	577791	577938	PLE/Penelope#rnd-5_family-2837	21.6	+	0
Rd10x_p_00013	578790	582816	DNA/Zator#Zator1_Av	21.785	+	1038
Rd10x_p_00013	580960	582281	DNA/Zator#rnd-6_family-4211	20.642	+	377
Rd10x_p_00013	582394	582648	DNA/Zator#rnd-6_family-4211	14.6	+	133
Rd10x_p_00013	585454	586579	DNA/TcMar-Tc1#rnd-5_family-4789	19.081	+	13
Rd10x_p_00013	594661	595112	LTR/Unknown#ltr-1_family-24	29	-	3
Rd10x_p_00013	598993	599038	DNA/Maverick#Polinton-3_LMi	21.7	-	7
Rd10x_p_00013	600146	600217	DNA/Sola-1#Sola1-1_AC	26.1	-	30
Rd10x_p_00014	4772	4835	LTR/Gypsy#Gypsy-23_DWil-LTR	13.3	+	0
Rd10x_p_00014	58884	58964	DNA/TcMar-Mariner#Mariner-9_PBa	22.1	+	0
Rd10x_p_00014	66138	66172	DNA/Kolobok-T2#Kolobok-1_LG	8.6	-	0
Rd10x_p_00014	89186	89246	DNA/RC#Helitron-N3_CGi	15.3	-	0
Rd10x_p_00014	113649	113760	PLE/Penelope#rnd-5_family-2837	19.1	-	19
Rd10x_p_00014	115617	115674	LTR/Gypsy#Gypsy61-I_AG	22.4	-	83
Rd10x_p_00014	115624	115683	LTR/Gypsy#Gypsy37-I_AG	23.7	+	81
Rd10x_p_00014	115779	115825	DNA/Crypton#Crypton_Av	21.3	-	102
Rd10x_p_00014	116017	116069	LINE/R1#R7Ag1	8.9	-	111
Rd10x_p_00014	132157	132531	DNA/TcMar-Mariner#Avmar3_Av	27	+	7
Rd10x_p_00014	135971	136042	DNA/TcMar-Tc1#rnd-5_family-2772	19.7	-	0
Rd10x_p_00014	183494	184223	LTR/Unknown#ltr-1_family-24	32.9	-	6
Rd10x_p_00014	184246	184807	LTR/Unknown#ltr-1_family-25	34.1	-	1
Rd10x_p_00014	199931	200089	DNA/TcMar-Tc1#rnd-1_family-218	26.4	+	7
Rd10x_p_00014	200204	200408	DNA/TcMar-Tc1#rnd-1_family-218	27.4	-	7
Rd10x_p_00014	210843	210897	PLE/Penelope-Athena#AthX-V-T	15.1	-	15
Rd10x_p_00014	212234	212390	LINE/RTE-BovB#rnd-6_family-5002	23.9	+	4
Rd10x_p_00014	213653	213698	PLE/Penelope-Athena#AthW1-J-R	6.9	+	7
Rd10x_p_00014	213666	213707	DNA/RC#Helitron-9_CGi	9.5	-	8
Rd10x_p_00014	216431	217018	DNA/hAT-Ac#rnd-5_family-7341	9.2	-	5
Rd10x_p_00014	223549	227534	LTR/Juno-Vesta#Juno3_Av	25.771	+	7
Rd10x_p_00014	244389	244497	PLE/Penelope#rnd-5_family-2837	15.7	-	1
Rd10x_p_00014	276457	276541	LTR/Gypsy#Gypsy-613_AA-I	20	-	115
Rd10x_p_00014	278593	278701	DNA/TcMar-Tc1#Tc5_cons_Av	21.1	+	1
Rd10x_p_00014	279276	279385	DNA/TcMar-Tc1#Tc5_cons_Av	20.2	-	1
Rd10x_p_00014	292575	292786	DNA/PIF-Harbinger#Harbinger3_Av	29.3	+	0
Rd10x_p_00014	292975	293353	DNA/IS5#IS5_Av	30.3	+	0
Rd10x_p_00014	295200	295957	DNA/PIF-ISL2EU#rnd-1_family-827	14.8	+	1
Rd10x_p_00014	296342	296428	DNA/RC#Heli2_Av_cons	24.4	+	0
Rd10x_p_00014	297163	297233	DNA/PIF-Spy#ISL2EU-5_CFl	26.8	-	0
Rd10x_p_00014	297225	297418	DNA/RC#Heli3_Av	27.6	+	0
Rd10x_p_00014	320333	320683	DNA/PIF-ISL2EU#ISL2EU2_Av	27.4	+	34
Rd10x_p_00014	321451	321998	DNA/TcMar-Tc1#rnd-3_family-532	22	-	18
Rd10x_p_00014	324085	324511	DNA/MULE-MuDR#MULE2_Av	31.9	-	0
Rd10x_p_00014	339293	339333	LTR/Gypsy#Gypsy-27_LSal-I	12.2	+	0
Rd10x_p_00014	347117	347261	LTR/Unknown#ltr-1_family-1	27.8	+	1
Rd10x_p_00014	348176	348796	DNA/hAT-hobo#rnd-5_family-389	32	+	1
Rd10x_p_00014	352113	352586	DNA/TcMar-Sagan#rnd-5_family-1033	27.034	-	1
Rd10x_p_00014	352587	352629	DNA/TcMar-Sagan#rnd-5_family-1033	25.3	+	2
Rd10x_p_00014	361364	361401	DNA/Ginger#Ginger1-1_AC	7.9	-	20
Rd10x_p_00014	361367	361410	LINE/I-Jockey#Jockey-3_DAn	14	+	20
Rd10x_p_00014	375984	376548	DNA/TcMar-Mariner#Avmar8_Av	23.9	+	4
Rd10x_p_00014	383878	384752	DNA/TcMar-Tc1#rnd-5_family-9292	10.301	-	1
Rd10x_p_00014	393736	393868	DNA/hAT-hobo#hAT-2_DF	25.8	-	8
Rd10x_p_00014	399911	399958	LTR/Gypsy#Gypsy44-I_AG	8.9	+	6
Rd10x_p_00014	402524	402583	DNA/hAT-Tip100#hAT-15_HRo	16.7	+	11
Rd10x_p_00014	402532	402599	LINE/L2#L2-8_NVi	16.2	-	12
Rd10x_p_00014	413955	414034	DNA/PIF-Spy#ISL2EU-3_CFl	24.4	+	16
Rd10x_p_00014	417186	422234	LINE#rnd-5_family-3949	4.6	+	22
Rd10x_p_00014	430061	430116	PLE/Penelope-Athena#AthW-J	22.2	-	85
Rd10x_p_00014	435722	436034	DNA/TcMar-Tc1#rnd-3_family-532	31	+	19
Rd10x_p_00014	438294	438340	LTR/Gypsy#Gypsy6-I_Dpse	6.4	-	0
Rd10x_p_00014	443681	444140	DNA/TcMar-Tc1#rnd-1_family-218	25.9	+	5
Rd10x_p_00014	444359	444451	DNA/TcMar-Tc1#rnd-1_family-218	22	-	5
Rd10x_p_00014	459015	459128	DNA/Maverick#Polinton-8_NVi	27.4	+	4
Rd10x_p_00014	470287	470340	DNA/Maverick#Polinton-8_NVi	13.2	-	1
Rd10x_p_00014	484777	484915	DNA/TcMar-Tigger#Tigger_Av	32.6	+	16
Rd10x_p_00014	502446	502503	DNA/hAT#hAT15_Av	19.3	+	35
Rd10x_p_00014	504151	505378	DNA/TcMar-Pogo#pogo6_Av	25.566	-	1
Rd10x_p_00014	504297	505227	DNA/TcMar-Tc4#rnd-6_family-1435	9.4	-	1
Rd10x_p_00014	505084	505384	DNA/PiggyBac-Looper#Looper3_Av	28.1	-	0
Rd10x_p_00014	512898	513062	DNA/TcMar-Mariner#rnd-1_family-446	24.9	+	0
Rd10x_p_00014	516780	516860	DNA/hAT-Tip100#rnd-6_family-53	17.7	+	4
Rd10x_p_00014	518804	518854	PLE/Penelope-Athena#AthJ-N	19.6	+	8
Rd10x_p_00014	541123	541394	LINE#rnd-5_family-3949	12.5	-	0
Rd10x_p_00014	546029	546044	DNA/TcMar-Tc1#Mariner-79_HSal	23.5	+	19
Rd10x_p_00014	546045	546090	DNA/CMC-Chapaev-3#Chapaev3-1_HR	19.6	+	23
Rd10x_p_00014	546061	546105	DNA/Kolobok-T2?#Kolobok-N1_AEc	9.3	+	23
Rd10x_p_00014	546106	546116	LINE/L2#Daphne-29_HRo	23.7	-	23
Rd10x_p_00014	561097	561172	LTR/Gypsy#Gypsy6-NVi_LTR	13.9	+	20
Rd10x_p_00014	561106	561186	DNA/RC#Helitron-N1_PBa	21	+	20
Rd10x_p_00014	561829	561919	DNA/PIF-Spy#ISL2EU-4_CFl	24.4	+	3
Rd10x_p_00014	569082	569287	DNA/RC#rnd-1_family-394	17.1	-	23
Rd10x_p_00014	571385	571575	DNA/TcMar-Tc1#rnd-3_family-532	30.3	-	1
Rd10x_p_00014	584218	584309	DNA/TcMar-Tc1#rnd-1_family-218	29.4	+	1
Rd10x_p_00014	584385	584504	DNA/TcMar-Tc1#rnd-1_family-218	29.2	-	3
Rd10x_p_00014	595905	601102	LINE/Soliton#Soliton6a_Av	31.869	-	0
Rd10x_p_00014	604094	604823	DNA/TcMar-Tc1#Tc12_Av	28.7	+	0
Rd10x_p_00014	628696	629926	LTR/Gypsy#rnd-6_family-4718	31.709	-	0
Rd10x_p_00015	31383	31397	DNA/Maverick#Polinton-9_NVi	24.6	-	149
Rd10x_p_00015	31441	31525	LINE/L1-Tx1#Tx1-1_CGi	20.4	+	189
Rd10x_p_00015	51668	51744	LTR/Gypsy#Gypsy68-I_AG	23.4	-	0
Rd10x_p_00015	59106	59307	DNA/TcMar-Tc1#rnd-3_family-532	26.9	-	7
Rd10x_p_00015	111515	111625	DNA/Crypton#Crypton-1_CTe	26.6	+	29
Rd10x_p_00015	118795	118868	PLE/Penelope-Athena#AthW1	21.9	+	38
Rd10x_p_00015	119334	119496	DNA/TcMar-Mariner#rnd-4_family-2342	22.1	+	27
Rd10x_p_00015	135035	135130	DNA/TcMar-Mariner#rnd-6_family-7637	25	-	7
Rd10x_p_00015	151084	151275	DNA/TcMar-Tc1#rnd-4_family-459	31.8	-	4
Rd10x_p_00015	156923	156985	PLE/Penelope-Athena#AthW1-J-R	17.7	+	3
Rd10x_p_00015	178934	180413	DNA/TcMar-Tc2#rnd-6_family-1946	17.103	-	3
Rd10x_p_00015	192779	192880	DNA/Maverick#Polinton-4_PBa	27.1	+	15
Rd10x_p_00015	192785	192905	LINE/CR1#CR1-18_HRo	24.6	+	19
Rd10x_p_00015	196357	196389	PLE/Penelope-Athena#AthJ-W	6.1	+	25
Rd10x_p_00015	206747	207123	LINE/I-Jockey#TART_DV	28.9	+	268
Rd10x_p_00015	206952	207098	PLE/Penelope-Athena#AthL3	25	+	155
Rd10x_p_00015	208124	208177	DNA/PiggyBac-Pokey#Pokey4_Av	17	-	21
Rd10x_p_00015	213860	213902	DNA/RC#rnd-6_family-1268	16.3	+	0
Rd10x_p_00015	227362	227909	DNA/PiggyBac-Looper#Looper2_Av	30.8	-	1
Rd10x_p_00015	228000	228049	DNA/PiggyBac-PB#AvPB1	14	+	0
Rd10x_p_00015	249665	249690	LTR/Gypsy#Gypsy6-I_Dya	0	+	5
Rd10x_p_00015	255190	256333	DNA/Ginger-1#rnd-6_family-948	29.2	+	7
Rd10x_p_00015	255509	256089	DNA/TcMar-m44#rnd-6_family-3050	16.6	+	7
Rd10x_p_00015	256147	256408	DNA/Ginger-1#rnd-6_family-948	26.6	-	7
Rd10x_p_00015	260545	261541	DNA/CMC-EnSpm#EnSpm3_Av	32.576	+	5
Rd10x_p_00015	261958	263545	DNA/TcMar-Tc2#rnd-6_family-1946	27.59	+	5
Rd10x_p_00015	261989	262259	DNA/TcMar-Pogo#pogo2_Av	30.4	+	5
Rd10x_p_00015	271757	272045	DNA/TcMar-Tc1#Tc4_Av	33.4	-	2
Rd10x_p_00015	272264	272351	DNA/Kolobok-T2?#Kolobok-N1_AEc	29.6	-	2
Rd10x_p_00015	274522	274541	DNA/TcMar-Mariner#Avmar5_Av	22.9	+	2
Rd10x_p_00015	278441	278530	DNA/MULE-MuDR#DNA9-2_AAe	18	+	0
Rd10x_p_00015	307762	308217	DNA/PiggyBac#piggyBac7_Av	22.859	+	2
Rd10x_p_00015	307883	307940	LTR/Juno-Vesta#Juno2_Av	17.2	+	2
Rd10x_p_00015	324081	324163	LINE/L2#Daphne-15_CTe	18.3	-	7
Rd10x_p_00015	335011	335176	DNA/MULE-MuDR#rnd-6_family-1219	16.1	-	10
Rd10x_p_00015	335399	335485	DNA/MULE-MuDR#rnd-6_family-1219	12.7	+	8
Rd10x_p_00015	338895	339090	LTR/Unknown#ltr-1_family-24	27.5	-	25
Rd10x_p_00015	339846	340049	LTR/Unknown#ltr-1_family-24	27.9	+	6
Rd10x_p_00015	343294	343344	DNA/TcMar-Tc1#Tc2_Av	13.7	-	8
Rd10x_p_00015	346571	346699	PLE/Penelope#rnd-5_family-5596	29.5	-	9
Rd10x_p_00015	350225	350282	DNA/Kolobok#Kolobok3_Av	6.9	-	12
Rd10x_p_00015	351035	351139	PLE/Penelope-Athena#AthV-L1	24.2	+	71
Rd10x_p_00015	359262	359476	DNA/TcMar-Tc4#rnd-6_family-4666	25.4	-	0
Rd10x_p_00015	359741	359905	DNA/TcMar-Tc1#rnd-6_family-6000	31.5	+	0
Rd10x_p_00015	362911	363113	DNA/hAT-hobo#rnd-1_family-408	14.8	+	15
Rd10x_p_00015	374859	375298	DNA/MULE-MuDR#rnd-6_family-157	9.4	-	0
Rd10x_p_00015	381802	381903	DNA/MULE-MuDR#rnd-6_family-544	11.8	+	0
Rd10x_p_00015	386324	386551	DNA/TcMar-Tc1#rnd-1_family-508	18.7	-	2
Rd10x_p_00015	394369	394457	DNA/MULE-MuDR#rnd-4_family-2201	22.5	+	2
Rd10x_p_00015	394452	394610	DNA/TcMar-Tc1#rnd-5_family-2772	20.8	-	3
Rd10x_p_00015	416979	417803	DNA/hAT#hAT26_Av	26.741	+	6
Rd10x_p_00015	421638	421701	LTR/Copia#Copia-65_AA-I	16.4	-	3
Rd10x_p_00015	428779	428818	PLE/Penelope-Athena#AthW2-2	17.5	+	64
Rd10x_p_00015	430251	430307	DNA/CMC-Chapaev#Chapaev-1_AA	26.3	+	15
Rd10x_p_00015	442104	442139	LINE/L2#L2-8_NVi	2.8	-	17
Rd10x_p_00015	442405	442491	DNA/Maverick#Polinton-8_NVi	19.1	+	17
Rd10x_p_00015	442439	442515	DNA#DNA5-4_CGi	18.4	-	18
Rd10x_p_00015	442838	442933	DNA/MULE-MuDR#rnd-3_family-112	27.6	+	18
Rd10x_p_00015	449993	450101	DNA/MULE-MuDR#DNA9-2_AAe	30.3	-	0
Rd10x_p_00015	458262	458322	LTR/Copia#Copia-6_LH-I	16.9	+	729
Rd10x_p_00015	467125	467408	DNA/TcMar-Tc1#rnd-3_family-532	32.2	-	8
Rd10x_p_00015	467348	467532	DNA/TcMar-Tc1#rnd-3_family-532	32.2	+	4
Rd10x_p_00015	472748	472819	DNA/Maverick#Polinton-8_NVi	16.9	-	6
Rd10x_p_00015	488635	488684	LTR/Gypsy#Gypsy68-I_AG	26	+	157
Rd10x_p_00015	488643	488684	LINE/L2#L2-8_NVi	16.7	-	149
Rd10x_p_00015	488685	488734	DNA/Kolobok-T2?#Kolobok-N1_AEc	22.8	-	170
Rd10x_p_00015	492322	492392	PLE/Penelope-Athena#AthK-V	16.9	-	49
Rd10x_p_00015	492496	492578	PLE/Penelope-Athena#AthW2-2	21.6	+	47
Rd10x_p_00015	500080	500185	DNA/TcMar-Mariner#Avmar7_Av	32.1	-	7
Rd10x_p_00015	505983	506065	LTR/TelKA#TelKA2_Av	12.8	-	6
Rd10x_p_00015	513613	514048	DNA/Sola-2#rnd-6_family-13845	12.108	+	0
Rd10x_p_00015	532082	532138	DNA/TcMar-Tc1#rnd-4_family-459	13.9	-	0
Rd10x_p_00015	536134	536965	DNA/MULE-MuDR#rnd-3_family-112	13.613	-	0
Rd10x_p_00015	560022	560091	DNA/hAT-hobo#rnd-1_family-408	10.3	-	17
Rd10x_p_00015	565032	565127	DNA/P#rnd-1_family-56	20.9	-	2
Rd10x_p_00015	585984	586349	DNA/RC#rnd-5_family-12029	32.3	+	0
Rd10x_p_00015	592920	593207	DNA/TcMar-Tc1#rnd-6_family-273	35.1	-	0
Rd10x_p_00015	595102	595145	DNA/Ginger#Ginger2b_Av	20.4	-	0
Rd10x_p_00015	595496	595687	DNA/TcMar-m44#rnd-5_family-974	7.8	-	0
Rd10x_p_00015	595684	596007	DNA/TcMar-m44#rnd-5_family-974	9.8	+	0
Rd10x_p_00015	618954	619403	DNA/hAT-Tip100#rnd-5_family-803	11.6	-	0
Rd10x_p_00015	622702	622763	LTR/Unknown#ltr-1_family-24	16.1	+	14
Rd10x_p_00015	642509	642620	PLE/Penelope-Athena#AthX-V-T	22.9	-	2
Rd10x_p_00015	644102	644261	DNA/TcMar-Tc1#rnd-3_family-532	30.6	+	1
Rd10x_p_00016	24676	24713	DNA/TcMar-Tc1#rnd-5_family-2772	10.5	-	29
Rd10x_p_00016	40782	40874	DNA#DNA3-4_CGi	25.3	+	24
Rd10x_p_00016	52055	52483	DNA/PiggyBac#rnd-6_family-2495	21.6	+	11
Rd10x_p_00016	62647	62980	DNA/TcMar-Tc1#rnd-5_family-338	22.7	+	0
Rd10x_p_00016	78548	79674	DNA/hAT-Ac#rnd-5_family-5936	17.603	-	14
Rd10x_p_00016	79174	79440	DNA/PiggyBac#rnd-4_family-328	22	+	12
Rd10x_p_00016	94427	95663	DNA/TcMar-Pogo#pogo6_Av	24.411	+	0
Rd10x_p_00016	94577	95516	DNA/TcMar-Tc4#rnd-6_family-1435	8.2	+	0
Rd10x_p_00016	111581	112057	DNA/TcMar-Tc1#rnd-1_family-218	19.2	+	2
Rd10x_p_00016	146224	146325	DNA/hAT-hobo#rnd-1_family-408	15.7	-	16
Rd10x_p_00016	147040	147085	DNA/PiggyBac#rnd-1_family-348	15.2	-	17
Rd10x_p_00016	147542	147934	DNA/TcMar-Tc1#rnd-3_family-532	32.905	-	17
Rd10x_p_00016	155069	155108	PLE/Penelope-Athena#AthL3	17.5	+	7
Rd10x_p_00016	163060	163112	DNA/RC#Helitron-N34_CGi	15.1	-	0
Rd10x_p_00016	163078	163150	LINE/L1-Tx1#Tx1-1_CGi	28.8	+	0
Rd10x_p_00016	166768	166807	DNA/RC#rnd-1_family-394	17.5	-	0
Rd10x_p_00016	182761	182806	DNA/PiggyBac-PB#AvPB3	22.6	+	6
Rd10x_p_00016	214493	214671	DNA/Ginger#Ginger2c_Av	27	+	0
Rd10x_p_00016	223972	225144	DNA/TcMar-Tc1#Tc9_Av	34.5	-	8
Rd10x_p_00016	235657	235714	PLE/Penelope#rnd-5_family-2837	20.7	+	0
Rd10x_p_00016	274836	274879	PLE/Penelope-Athena#AthW2-2	18.2	-	1
Rd10x_p_00016	282798	283553	DNA/hAT#hAT30_Av	23.437	-	1
Rd10x_p_00016	304060	304158	SINE/tRNA-Core#BivaCORE-SINE1_RuDe	32.6	-	1
Rd10x_p_00016	328760	328843	LINE/R1#R1-5_DWi	23.5	-	33
Rd10x_p_00016	333076	333389	DNA/TcMar-Tc1#rnd-3_family-532	30	+	0
Rd10x_p_00016	338810	339215	DNA/PiggyBac#rnd-5_family-7055	27.4	-	0
Rd10x_p_00016	341668	342538	DNA/hAT-Ac#rnd-5_family-5936	15.604	-	0
Rd10x_p_00016	342196	342346	DNA/MULE-MuDR#MuDR5_Av	26.9	-	0
Rd10x_p_00016	358140	358449	DNA/hAT-hobo#rnd-5_family-2169	19	-	0
Rd10x_p_00016	363208	363532	DNA/TcMar-Tc1#Tc19_Av	24.6	-	0
Rd10x_p_00016	366113	366308	DNA/hAT-Tip100#rnd-6_family-53	30.3	+	0
Rd10x_p_00016	367714	367778	LTR/Gypsy#Gypsy-236_AA-I	19.8	+	24
Rd10x_p_00016	369849	369903	DNA/hAT#hAT7_Av	21.8	-	28
Rd10x_p_00016	372482	372535	DNA/CMC-Chapaev#Chapaev-1_AA	17.3	-	4
Rd10x_p_00016	377350	377430	DNA/Ginger#Ginger2c_Av	23.5	-	9
Rd10x_p_00016	378172	378309	DNA/TcMar-Tc1#rnd-3_family-532	32.6	-	0
Rd10x_p_00016	406150	406274	PLE/Penelope-Athena#AthP1	20.7	+	5
Rd10x_p_00016	406188	407153	DNA/hAT#hAT11_Av	18.904	+	7
Rd10x_p_00016	408578	408623	LTR/Gypsy#Gypsy-176_AA-I	8.7	+	29
Rd10x_p_00016	415767	415827	LTR/Gypsy#Gypsy-16_LG-I	21.3	-	5
Rd10x_p_00016	426935	426980	DNA/Kolobok#Kolobok-10_CGi	10.9	-	8
Rd10x_p_00016	435694	435885	DNA/P#rnd-1_family-56	16.9	+	13
Rd10x_p_00016	440725	440764	DNA/Maverick#Polinton-4_PBa	32.1	+	34
Rd10x_p_00016	440765	440783	DNA/MULE-MuDR#rnd-6_family-1219	22.6	-	21
Rd10x_p_00016	441509	442722	DNA/TcMar-Mariner#rnd-4_family-2342	22.166	-	14
Rd10x_p_00016	449688	449781	DNA/PIF-ISL2EU#ISL2EU-18_CGi	21.1	+	0
Rd10x_p_00016	450249	450287	LINE/L2#L2-8_NVi	10.3	+	1
Rd10x_p_00016	461269	461387	DNA/TcMar-Tc1#rnd-1_family-508	11	+	0
Rd10x_p_00016	462669	462826	DNA/TcMar-Mariner#rnd-1_family-446	17.7	+	2
Rd10x_p_00016	473586	473906	PLE/Penelope#rnd-5_family-2837	20.9	-	0
Rd10x_p_00016	473886	474011	DNA/PiggyBac#piggyBac2_Av	25.2	-	0
Rd10x_p_00016	484235	484277	PLE/Penelope-Athena#AthX-V-T	18.6	-	17
Rd10x_p_00016	484240	484298	LINE/L2#Daphne-38_HRo	13.8	+	21
Rd10x_p_00016	484794	485478	DNA/TcMar-Tc1#rnd-3_family-532	18.402	+	10
Rd10x_p_00016	485226	485468	DNA/TcMar-Tc1#rnd-3_family-532	20.8	-	10
Rd10x_p_00016	493575	494292	DNA/TcMar-Tc1#rnd-1_family-218	18.3	-	0
Rd10x_p_00016	495436	495792	DNA/Sola-2#rnd-6_family-13845	28.4	-	0
Rd10x_p_00016	518815	518918	DNA/TcMar-Tc1#rnd-3_family-532	28.9	-	0
Rd10x_p_00016	519231	519353	DNA/TcMar-Tc1#rnd-3_family-532	21.8	+	0
Rd10x_p_00016	523111	523122	LTR/Gypsy#Gypsy37-I_AG	16.5	-	8
Rd10x_p_00016	529373	529554	LTR/Unknown#ltr-1_family-1	25.1	+	0
Rd10x_p_00016	550699	550934	LTR/Unknown#ltr-1_family-24	23.7	+	0
Rd10x_p_00016	553650	553817	DNA#rnd-6_family-4969	16.6	+	23
Rd10x_p_00016	567886	568448	DNA/TcMar-Tc1#rnd-3_family-532	18.4	-	7
Rd10x_p_00016	568452	569522	DNA/TcMar-Tc1#rnd-3_family-532	17.769	+	7
Rd10x_p_00016	588916	589542	DNA/TcMar-Mariner#rnd-5_family-4115	24	-	0
Rd10x_p_00016	589538	589690	DNA/TcMar-Mariner#rnd-5_family-4115	23.5	+	0
Rd10x_p_00016	595037	595123	DNA/PIF-Spy#rnd-5_family-4741	20.9	-	0
Rd10x_p_00016	621057	621106	LTR/Gypsy#Gypsy6-I_Dmoj	12.2	+	10
Rd10x_p_00016	648666	648819	DNA/PiggyBac#rnd-5_family-7055	19.2	-	0
Rd10x_p_00017	8125	8478	DNA/TcMar-Tc1#Tc13_Av	34.3	+	10
Rd10x_p_00017	8515	8795	DNA/TcMar-Tc1#Tc21_Av	33.3	+	10
Rd10x_p_00017	8639	8799	DNA/TcMar-Tc1#Tc13_Av	25.3	-	10
Rd10x_p_00017	16123	16196	DNA/Maverick#Polinton-1_CB	17.8	+	13
Rd10x_p_00017	23240	23567	DNA/hAT-Tip100#rnd-5_family-2070	11.655	+	6
Rd10x_p_00017	31427	31460	LINE/CR1#CR1-16_HRo	2.9	-	0
Rd10x_p_00017	42960	43024	DNA#rnd-6_family-14715	26.1	+	0
Rd10x_p_00017	42982	43458	DNA/P#rnd-1_family-56	18.64	+	0
Rd10x_p_00017	43045	43373	DNA/P#rnd-1_family-56	20.4	-	0
Rd10x_p_00017	47489	48031	DNA/hAT#hAT22_Av	30	-	1
Rd10x_p_00017	50404	50556	DNA/MULE-MuDR#rnd-6_family-4571	24.1	-	2
Rd10x_p_00017	55301	55325	DNA/TcMar-Pogo#pogo13_Av	26.5	+	11
Rd10x_p_00017	60008	60152	DNA/hAT-hobo#rnd-5_family-429	22.9	-	2
Rd10x_p_00017	79431	79502	DNA/CMC-EnSpm#EnSpm3_Av	25	-	23
Rd10x_p_00017	83679	83778	DNA/MULE-MuDR#rnd-6_family-1219	20.6	+	98
Rd10x_p_00017	104970	105115	DNA/P#rnd-1_family-56	18.1	-	0
Rd10x_p_00017	105088	105416	DNA/P#rnd-1_family-56	24.076	+	1
Rd10x_p_00017	111291	111340	LTR/Unknown#ltr-1_family-24	20	-	12
Rd10x_p_00017	137429	137483	LTR/Pao#KAMIKAZE_BM-I	20	-	0
Rd10x_p_00017	155816	155853	PLE/Penelope-Athena#AthW2-2	15.8	+	76
Rd10x_p_00017	166071	166135	DNA/Maverick#Polinton-1_NVi	20.3	-	6
Rd10x_p_00017	176757	176800	DNA/hAT-Charlie#hAT-9_HRo	13.6	-	58
Rd10x_p_00017	179547	179833	DNA/hAT#hAT23_Av	33	-	0
Rd10x_p_00017	197494	197658	LTR/Unknown#ltr-1_family-24	28.5	-	7
Rd10x_p_00017	197809	198287	LTR/Unknown#ltr-1_family-24	27.3	+	7
Rd10x_p_00017	206434	206765	DNA/TcMar-Tc2#rnd-6_family-1946	12.878	-	16
Rd10x_p_00017	221911	222640	LINE/I#rnd-5_family-3886	28.973	-	1
Rd10x_p_00017	226563	226606	LTR/Gypsy#Gypsy-47_DWil-I	14.3	+	28
Rd10x_p_00017	237363	237402	PLE/Penelope-Athena#AthX-V-T	7.5	-	9
Rd10x_p_00017	245669	245713	PLE/Penelope-Athena#AthX-V-T	17.8	-	0
Rd10x_p_00017	251920	252093	DNA/hAT#hAT1_Av	25.2	-	17
Rd10x_p_00017	254471	254663	DNA/TcMar-Tc1#Tc13_Av	32.5	-	17
Rd10x_p_00017	268366	269377	DNA/TcMar-Mariner#Avmar9_Av	27.932	-	2
Rd10x_p_00017	269064	269259	DNA/TcMar-Tc1#rnd-5_family-2216	29.9	-	0
Rd10x_p_00017	278068	278237	DNA/TcMar-Tc1#rnd-6_family-6000	23.4	+	0
Rd10x_p_00017	289100	289130	LTR/Pao#BEL-8_DWil-I	3.2	-	18
Rd10x_p_00017	297662	297719	DNA/hAT-Pegasus#Hopers3	13.6	-	42
Rd10x_p_00017	302088	302356	DNA/TcMar-m44#rnd-5_family-974	23	+	11
Rd10x_p_00017	313701	313794	DNA/TcMar-Tc1#rnd-5_family-337	21.1	-	10
Rd10x_p_00017	318517	318940	DNA/MULE-MuDR#rnd-3_family-112	17.4	+	0
Rd10x_p_00017	350542	350604	LTR/Gypsy#ROVER-LTR_DM	21.7	-	22
Rd10x_p_00017	357663	357875	DNA/RC#rnd-1_family-394	19.6	+	0
Rd10x_p_00017	365788	365842	LTR/Pao#BEL-2_LG-I	21.8	-	1
Rd10x_p_00017	372305	372982	DNA/TcMar-Mariner#rnd-4_family-2342	27.7	-	0
Rd10x_p_00017	373207	373318	DNA/PiggyBac#rnd-6_family-2495	24.1	-	0
Rd10x_p_00017	375800	375912	DNA/PiggyBac#rnd-6_family-6403	16.1	+	0
Rd10x_p_00017	386296	386380	DNA/Maverick#Polinton-3_PBa	23.5	-	15
Rd10x_p_00017	394201	394435	DNA/TcMar-Tc1#rnd-3_family-532	26.9	+	0
Rd10x_p_00017	396652	396926	DNA/TcMar-Tc1#rnd-3_family-532	32.7	+	13
Rd10x_p_00017	411637	411690	SINE/tRNA-Core#OK	24.1	+	0
Rd10x_p_00017	411657	411698	LTR/Gypsy#Gypsy-10_DVir-LTR	19.1	-	0
Rd10x_p_00017	416531	416573	LTR/Gypsy#Gypsy-62_CQ-LTR	7.5	-	0
Rd10x_p_00017	424955	425229	DNA/hAT-hobo#rnd-5_family-389	16.1	+	20
Rd10x_p_00017	433240	433495	DNA/Sola#Sola2h_Av	29.1	+	17
Rd10x_p_00017	441006	441978	DNA/TcMar-Mariner#Avmar9_Av	27.1	-	0
Rd10x_p_00017	456412	456435	DNA/CMC-EnSpm#EnSpm3_Av	26.9	+	0
Rd10x_p_00017	464787	465391	DNA/PiggyBac#rnd-5_family-2943	12.7	-	2
Rd10x_p_00017	469194	469250	DNA/CMC-EnSpm#CACTA2_Av	22.8	-	3
Rd10x_p_00017	471309	471368	DNA/hAT#hAT15_Av	18.3	-	0
Rd10x_p_00017	477591	477641	DNA/TcMar-Tc1#Mariner-15_SIn	20	+	170
Rd10x_p_00017	479584	479806	DNA/P#rnd-1_family-56	30.2	+	7
Rd10x_p_00017	491823	491872	LTR/Gypsy#Gypsy-22_DWil-I	12.2	+	1
Rd10x_p_00017	492757	492843	LTR/Gypsy#Gypsy-1_DG-LTR	24.4	+	4
Rd10x_p_00017	493071	493121	DNA/Kolobok-T2?#Kolobok-N1_AEc	15.7	+	3
Rd10x_p_00017	493482	493530	LTR/Gypsy#Gypsy6-NVi_LTR	14.3	+	2
Rd10x_p_00017	502390	502487	PLE/Penelope#rnd-6_family-4623	15.3	-	32
Rd10x_p_00017	511692	511732	LINE/L2#Crack-2_CQ	19.5	+	32
Rd10x_p_00017	539858	539906	LTR/Gypsy#Gypsy-35_CGi-I	16.3	-	8
Rd10x_p_00017	542536	542593	DNA/RC#Helitron-N6_CGi	19	+	6
Rd10x_p_00017	544903	544975	DNA#DNA-11_CGi	16.9	-	15
Rd10x_p_00017	545431	545465	LTR/Copia#Copia-68_AA-I	8.8	+	49
Rd10x_p_00017	551021	551087	DNA/CMC-EnSpm#EnSpm3_Av	20.4	-	139
Rd10x_p_00017	551433	551474	DNA/Maverick#Polinton-2_TC	10	-	133
Rd10x_p_00017	553985	554069	LINE/L2#Daphne-34_HRo	21.4	-	0
Rd10x_p_00017	556645	556975	DNA/Sola#Sola2h_Av	34.6	-	0
Rd10x_p_00017	575689	576284	DNA/PiggyBac#piggyBac4_Av	22.629	-	0
Rd10x_p_00017	583598	584189	DNA/TcMar-Mariner#rnd-5_family-4115	22.878	-	1
Rd10x_p_00017	593147	593234	DNA/TcMar-m44#rnd-5_family-974	23.5	+	0
Rd10x_p_00017	596315	596503	PLE/Penelope-Athena#AthW	27.2	+	0
Rd10x_p_00017	597550	597771	DNA/hAT-hobo#rnd-1_family-408	14.5	+	1
Rd10x_p_00017	610363	610583	DNA/hAT-hobo#rnd-1_family-408	15.1	-	0
Rd10x_p_00017	626450	626514	DNA#Clu-111_AG	20.6	+	54
Rd10x_p_00018	31383	31522	DNA/PiggyBac#rnd-6_family-6403	25	-	0
Rd10x_p_00018	32097	32272	DNA/PiggyBac#rnd-6_family-6403	24.6	+	0
Rd10x_p_00018	40232	40333	DNA/TcMar-m44#rnd-5_family-831	26.6	+	0
Rd10x_p_00018	41661	41807	DNA/TcMar-m44#rnd-6_family-3050	29.3	+	3
Rd10x_p_00018	42411	43038	DNA/TcMar-Mariner#Avmar7_Av	34.8	-	0
Rd10x_p_00018	53192	53546	DNA/TcMar-Tc1#rnd-4_family-459	26.371	-	0
Rd10x_p_00018	55960	56054	LTR/Gypsy#Gypsy68-I_AG	18.7	+	14
Rd10x_p_00018	70701	71887	DNA/hAT-hobo#rnd-6_family-5952	10.104	-	0
Rd10x_p_00018	107540	109244	DNA/PiggyBac#rnd-6_family-2707	25.8	+	5
Rd10x_p_00018	110103	110159	PLE/Penelope#rnd-5_family-5596	26.3	-	0
Rd10x_p_00018	110686	110810	DNA/MULE-MuDR#MULE5_Av	21.6	-	1
Rd10x_p_00018	110870	111162	DNA/MULE-MuDR#rnd-4_family-2201	23.4	-	2
Rd10x_p_00018	112774	113134	DNA/PiggyBac-Pokey#Pokey4_Av	25.2	-	0
Rd10x_p_00018	113135	113228	DNA/P#rnd-1_family-56	22.3	+	0
Rd10x_p_00018	116379	116425	DNA/TcMar-Mariner#rnd-1_family-446	25.9	+	5
Rd10x_p_00018	125736	125842	PLE/Penelope#Penelope-5_HRo	18.9	-	181
Rd10x_p_00018	125797	125850	PLE/Penelope-Athena#AthX-V-T	14.8	-	134
Rd10x_p_00018	128528	128592	LINE/L2#Daphne-6_HRo	10.8	+	49
Rd10x_p_00018	139334	139750	DNA/hAT-hobo#rnd-6_family-4984	16.7	-	0
Rd10x_p_00018	149422	149470	PLE/Penelope#Penelope-5_HRo	10.2	-	11
Rd10x_p_00018	149423	149489	DNA/Crypton#Crypton-1_CTe	22.3	-	13
Rd10x_p_00018	160914	160987	PLE/Penelope-Athena#AthX-V-T	15.7	+	1
Rd10x_p_00018	163793	163851	PLE/Penelope#Penelope-5_HRo	15.2	+	45
Rd10x_p_00018	165263	165404	DNA/RC#rnd-1_family-394	15	-	0
Rd10x_p_00018	165269	165435	DNA/RC#rnd-1_family-394	25	+	0
Rd10x_p_00018	166255	166499	DNA/TcMar-Tc1#rnd-1_family-508	19.6	-	0
Rd10x_p_00018	166656	166765	PLE/Penelope-Athena#AthP1	27.1	-	0
Rd10x_p_00018	175775	175837	LTR/Gypsy#Gypsy-3_PBa-I	15.9	+	8
Rd10x_p_00018	175782	175853	DNA/CMC-Chapaev-3#Chapaev3-1_HR	15.3	-	12
Rd10x_p_00018	199151	199599	DNA/P#rnd-1_family-56	27.2	-	11
Rd10x_p_00018	199585	200059	DNA/P#rnd-1_family-56	26.4	+	10
Rd10x_p_00018	231982	232193	DNA/PiggyBac#rnd-4_family-328	20.2	-	25
Rd10x_p_00018	246564	251029	LINE/I-Jockey#rnd-5_family-3195	6.2	-	9
Rd10x_p_00018	248211	251794	LINE/Soliton#Soliton7_Av	32.951	+	8
Rd10x_p_00018	282540	282763	LTR/Unknown#ltr-1_family-24	29.7	+	32
Rd10x_p_00018	295390	296030	DNA/hAT-Tip100#rnd-5_family-7855	4.7	+	27
Rd10x_p_00018	300488	300617	DNA/Sola#Sola2d_Av	22.3	+	0
Rd10x_p_00018	300737	302122	DNA/CMC-EnSpm#EnSpm1_Av	31.411	+	0
Rd10x_p_00018	304715	305010	LTR/Unknown#ltr-1_family-26	15.2	+	84
Rd10x_p_00018	305011	305359	LTR/Gypsy#ltr-1_family-27	15.9	+	17
Rd10x_p_00018	307118	307273	PLE/Penelope#rnd-5_family-2837	25.9	+	7
Rd10x_p_00018	307319	307389	LTR/Unknown#ltr-1_family-26	15.7	+	21
Rd10x_p_00018	318403	318452	LINE/L2#L2-8_NVi	14.6	+	352
Rd10x_p_00018	320137	320283	DNA/Sola#Sola2h_Av	26.4	-	0
Rd10x_p_00018	327224	327298	PLE/Penelope#Penelope-6_HRo	23	-	1
Rd10x_p_00018	328947	328992	PLE/Penelope-Athena#AthX-V-T	11.1	-	7
Rd10x_p_00018	335234	335928	DNA/TcMar-Tc1#rnd-4_family-459	29.227	-	0
Rd10x_p_00018	337453	337503	PLE/Penelope-Athena#AthW-J	18	+	713
Rd10x_p_00018	338966	339257	LINE/Soliton#Soliton2_Av	34.2	+	0
Rd10x_p_00018	339315	339830	LINE/I#rnd-5_family-2795	24.637	+	0
Rd10x_p_00018	344827	344877	DNA/PiggyBac#rnd-1_family-252	15.7	-	0
Rd10x_p_00018	345962	346045	DNA/hAT-Ac#rnd-6_family-6382	16.2	+	0
Rd10x_p_00018	349821	350207	LINE/Soliton#Soliton6b_Av	31.2	+	0
Rd10x_p_00018	349847	350189	LINE/L2#rnd-5_family-2872	22.2	+	0
Rd10x_p_00018	357769	357826	PLE/Penelope-Athena#AthW1-J-R	17.6	-	2
Rd10x_p_00018	375241	376758	DNA/TcMar-Tc1#rnd-6_family-442	30.865	+	2
Rd10x_p_00018	376759	377199	DNA/TcMar-Tc1#Tc11_Av	35.7	+	5
Rd10x_p_00018	381113	381485	DNA/TcMar-Tc1#rnd-6_family-442	29.4	-	1
Rd10x_p_00018	388810	388867	DNA/TcMar-Tc1#Mariner-76_HSal	21.5	-	4
Rd10x_p_00018	409951	410018	DNA#rnd-6_family-4969	8.1	+	0
Rd10x_p_00018	417303	417453	DNA/TcMar-Mariner#rnd-1_family-467	15.4	+	0
Rd10x_p_00018	433444	433504	PLE/Penelope#rnd-5_family-5596	20	+	0
Rd10x_p_00018	452834	453056	DNA/hAT-hobo#rnd-1_family-408	15.8	+	37
Rd10x_p_00018	467545	467698	LINE/I-Jockey#Jockey-6_DK	28.6	-	177
Rd10x_p_00018	468238	468305	LINE/I-Jockey#TART_DV	11	-	74
Rd10x_p_00018	493957	494106	PLE/Penelope#rnd-6_family-4623	27.3	+	1
Rd10x_p_00018	509471	509513	DNA#DNA-48_LSal	16.3	+	11
Rd10x_p_00018	517944	518110	LINE/I-Jockey#Jockey-3_DGri	21.5	-	18
Rd10x_p_00018	520395	520433	PLE/Penelope-Athena#AthX-V-T	7.9	-	30
Rd10x_p_00018	523711	523799	LINE/I-Jockey#TART_DV	17.5	-	23
Rd10x_p_00018	523898	523912	LINE/I-Jockey#Ag-Jock-1	25.4	-	9
Rd10x_p_00018	553280	554006	DNA/TcMar-Mariner#Avmar6_Av	19.2	+	3
Rd10x_p_00018	556565	556643	DNA/Ginger#Ginger2_Av	25.6	-	0
Rd10x_p_00019	38903	39063	DNA/TcMar-Tc1#rnd-5_family-4789	15.1	+	25
Rd10x_p_00019	39065	39498	DNA/TcMar-Tc1#rnd-1_family-559	32.1	+	28
Rd10x_p_00019	39305	39506	DNA/TcMar-Tc1#rnd-5_family-4789	24.8	-	26
Rd10x_p_00019	40023	40474	DNA/TcMar-Tc1#rnd-5_family-170	22.8	+	28
Rd10x_p_00019	43746	43999	DNA/PiggyBac#rnd-5_family-7055	24.5	+	35
Rd10x_p_00019	44030	44087	LINE/I#Loner_Ele3	11.4	+	33
Rd10x_p_00019	44103	44194	LTR/Unknown#ltr-1_family-8	30.4	+	33
Rd10x_p_00019	74688	74796	LINE/I#rnd-5_family-2795	24.5	-	0
Rd10x_p_00019	79452	80068	DNA/PiggyBac#rnd-1_family-514	8.6	-	5
Rd10x_p_00019	86358	86791	DNA/PiggyBac#piggyBac3_Av	7.8	-	0
Rd10x_p_00019	87201	87421	DNA/hAT-Tip100#rnd-5_family-2070	13.4	+	0
Rd10x_p_00019	107712	108913	DNA/hAT#hAT9_Av	28.471	-	0
Rd10x_p_00019	108932	110599	DNA/PIF-Harbinger#Harbinger3_Av	22.9	+	4
Rd10x_p_00019	115420	115656	DNA/TcMar-Tc1#rnd-6_family-1328	8.9	-	0
Rd10x_p_00019	121738	121783	DNA/RC#Helitron-9_CGi	15.6	-	5
Rd10x_p_00019	142569	142615	PLE/Penelope-Athena#AthJ-W	14.9	+	20
Rd10x_p_00019	144991	145086	LTR/Gypsy#Gypsy19-I_Dpse	20.4	+	47
Rd10x_p_00019	153564	153636	DNA/Kolobok-T2?#Kolobok-N1_AEc	17.4	+	16
Rd10x_p_00019	153637	153667	DNA/P#P-1_LHu	19.6	+	16
Rd10x_p_00019	159178	160593	DNA/TcMar-Mariner#rnd-4_family-2342	22.43	-	42
Rd10x_p_00019	164828	164888	LTR/Juno-Vesta#Vesta2_Av	15.5	-	17
Rd10x_p_00019	177540	177553	DNA/PiggyBac-Looper#Looper3_Av	30.3	+	0
Rd10x_p_00019	201644	201817	DNA/TcMar-Tc1#rnd-6_family-6000	18.1	-	0
Rd10x_p_00019	202385	202574	LINE/RTE#RTE2a_Av	25.9	+	0
Rd10x_p_00019	203116	203314	LINE/RTE#RTE2a_Av	25.1	-	0
Rd10x_p_00019	203334	203504	DNA/TcMar-Tc1#rnd-6_family-6000	17.1	+	0
Rd10x_p_00019	213220	213282	PLE/Penelope-Athena#AthW2-2	11.1	-	2
Rd10x_p_00019	217140	217197	DNA/Maverick#Polinton-9_NVi	13.8	+	1
Rd10x_p_00019	217154	217217	PLE/Penelope#Penelope-51_LMi	15.9	-	1
Rd10x_p_00019	233891	234044	DNA/TcMar-Mariner#rnd-5_family-4115	21.667	+	43
Rd10x_p_00019	234012	234373	DNA/TcMar-Mariner#rnd-5_family-4115	32.6	-	34
Rd10x_p_00019	239217	239280	DNA/TcMar-Mariner#rnd-6_family-7637	20.3	+	12
Rd10x_p_00019	239390	239831	DNA/TcMar-Tigger#Tigger2_Av	25.065	-	12
Rd10x_p_00019	250939	250999	LTR/Unknown#ltr-1_family-24	21.3	+	0
Rd10x_p_00019	255391	255599	DNA/TcMar-Tc1#rnd-3_family-532	24.2	+	0
Rd10x_p_00019	256580	256663	DNA#rnd-6_family-14715	14.6	-	12
[truncated: 39,551 more rows]

## Sheet: Rg_MAG1
MAG1_00001	14765	15323	DNA/hAT-Blackjack#rnd-5_family-3103	8.52	-	0
MAG1_00001	23126	23162	PLE/Penelope-Athena#AthJ-N-W1	5.4	-	2
MAG1_00001	34931	35070	DNA/TcMar-Tc1#Mariner-14_SIn	28.1	+	0
MAG1_00002	4901	5589	DNA/hAT-Ac#rnd-5_family-1273	27.186	+	64
MAG1_00002	6979	7039	LINE/L1#L1-38_LSal	14.4	-	0
MAG1_00002	13891	13926	LINE/I#Nimb-1_HRo	11.1	-	63
MAG1_00002	16156	16205	LINE/L2#L2B-4B_AAe	22	-	30
MAG1_00002	17530	17626	DNA/Kolobok-T2#REP-4_PBa	25	-	281
MAG1_00002	17572	17683	DNA/Kolobok-Hydra#Kolobok-3_Aplcal	22.9	-	261
MAG1_00002	33914	33971	DNA/TcMar-Tc1#Mariner-13_RPr	15.5	-	3
MAG1_00003	633	695	DNA/CMC-EnSpm#EnSpm-3_SIn	12.9	-	0
MAG1_00003	930	973	PLE/Penelope-Athena#AthW1-J-R	14	-	0
MAG1_00003	26069	26200	DNA/hAT#hAT9_Av	21.6	-	22
MAG1_00003	26267	26301	LTR/Gypsy#Gypsy61-I_AG	30.3	+	13
MAG1_00003	43048	43138	LINE/CR1#CR1-18_HRo	18.9	-	2
MAG1_00003	43053	43149	PLE/Penelope#Penelope-5_HRo	18.1	-	2
MAG1_00003	50450	50495	DNA/RC#Helitron-9_CGi	13	+	121
MAG1_00003	52063	52129	LTR/Pao#BEL-4_PPo-I	19.7	+	81
MAG1_00004	18315	18373	LINE/L2#Daphne-38_HRo	18.6	-	1
MAG1_00004	18337	18386	LTR/Gypsy#Gypsy-1_AC-I	24.5	-	1
MAG1_00004	30122	30133	DNA/hAT-Charlie#hAT-11_HRo	18.8	+	40
MAG1_00004	30134	30185	LINE/L2#L2-8_NVi	15.4	+	39
MAG1_00004	30143	30191	DNA/P#P-1_LHu	10.2	+	39
MAG1_00004	49198	49249	DNA/Maverick#Polinton-9_NVi	17.3	+	21
MAG1_00004	49200	49256	DNA/PIF-ISL2EU#ISL2EU-18_CGi	22.8	-	21
MAG1_00004	58095	58281	DNA/MULE-MuDR#DNA9-2_AAe	22.6	+	0
MAG1_00004	58111	58321	DNA/MULE-MuDR#MULE5_Av	22.7	-	0
MAG1_00005	5619	5655	LTR/Pao#BEL-19_CQ-LTR	13.5	+	0
MAG1_00005	5659	5673	DNA/Crypton#Crypton-1_CTe	18.6	-	0
MAG1_00005	12553	12647	PLE/Penelope-Athena#AthW1	13.1	+	0
MAG1_00005	13738	13820	PLE/Penelope#rnd-5_family-1539	6	+	0
MAG1_00005	25256	26118	DNA/TcMar-Tc1#Tc10_Av	25.9	+	3
MAG1_00005	26167	26504	DNA/TcMar-Tc1#Tc8_Av	31.5	+	6
MAG1_00005	26826	26885	DNA/RC#rnd-1_family-576	5.1	+	0
MAG1_00005	26886	26963	DNA/hAT-Blackjack#rnd-1_family-475	1.3	-	0
MAG1_00005	27914	28291	DNA/hAT-Blackjack#rnd-1_family-475	3.5	-	0
MAG1_00006	282	1375	DNA/hAT#hAT12_Av	21.39	-	4
MAG1_00006	716	804	DNA/hAT#hAT11_Av	25.8	-	4
MAG1_00006	4187	4493	DNA/MULE-MuDR#rnd-5_family-525	7.948	-	0
MAG1_00006	21425	21485	LTR/TelKA#TelKA1_Av	11.7	+	2
MAG1_00006	33958	34011	DNA/hAT#hAT19_Av	18.5	+	0
MAG1_00006	36049	38965	LINE/Soliton#Soliton9b_Av	33.2	+	2
MAG1_00006	36810	39014	LINE#rnd-4_family-77	28.5	-	2
MAG1_00006	39460	39537	LINE/Soliton#Soliton7_Av	15.8	+	2
MAG1_00007	28003	31863	DNA/hAT#hAT31_Av	20.103	-	33
MAG1_00007	45690	45769	LTR/Gypsy#Gypsy-84_CQ-I	24	+	150
MAG1_00007	55047	55128	DNA/TcMar-Sagan#rnd-5_family-2390	17.1	-	1
MAG1_00007	55125	55206	DNA/TcMar-Sagan#rnd-5_family-2390	17.1	+	1
MAG1_00008	41097	41149	LTR/Gypsy#MAG	15.7	-	0
MAG1_00008	46401	46426	PLE/Penelope-Athena#AthK-V	19	-	0
MAG1_00008	49973	50377	DNA/MULE-MuDR#rnd-6_family-4779	8.353	+	0
MAG1_00009	19705	19756	LTR/Copia#Copia-3_DEu-I	16.4	-	142
MAG1_00009	26433	26974	LINE#rnd-4_family-2585	33.2	-	1
MAG1_00009	26650	26953	LINE/Soliton#Soliton6_Av	27.8	-	1
MAG1_00009	27894	28052	LINE/Soliton#Soliton6b_Av	26.6	-	1
MAG1_00009	31084	32101	PLE/Penelope-Athena#AthP1	20.771	+	3
MAG1_00010	3047	3100	LINE/L2#L2-7_Hmel	24.1	+	3
MAG1_00010	29966	30017	LTR/Gypsy#Gypsy-21_CT-I	17.6	-	149
MAG1_00010	43856	43926	DNA/Kolobok-Hydra#Kolobok-7_CGi	18	+	1
MAG1_00010	52351	52457	DNA/TcMar-Sagan#rnd-5_family-2390	12.5	-	0
MAG1_00011	22445	23786	DNA/MULE-MuDR#rnd-5_family-531	5	+	0
MAG1_00011	41208	41368	DNA/hAT-hAT5#rnd-5_family-4512	35.4	-	0
MAG1_00012	142	447	DNA/hAT-Tip100#rnd-5_family-2873	29.7	-	0
MAG1_00012	3916	6446	LINE/RTE#RTE1_Av	28.2	+	0
MAG1_00012	6763	7260	LINE/RTE-BovB#rnd-1_family-602	5.8	+	4
MAG1_00012	18366	18419	DNA/TcMar-Tc1#Tc2_Av	24.1	+	459
MAG1_00012	29069	29120	DNA/Ginger#Ginger2a_Av	19.2	-	4
MAG1_00012	33092	33144	DNA#DNA2-7_CGi	17	+	0
MAG1_00012	38574	38612	DNA/TcMar-Tc1#Mariner-15_SIn	17.9	+	0
MAG1_00012	46520	46590	DNA/TcMar?#DNA-TA-9_AAe	21	-	940
MAG1_00013	16818	18417	DNA/Sola#Sola2c_Av	29.997	+	0
MAG1_00013	24314	24399	DNA/TcMar-Tigger#Tigger2_Av	10.4	-	4
MAG1_00013	35027	35083	DNA/RC#Helitron-N13_LMi	22.8	-	4
MAG1_00014	23	1211	DNA/TcMar-Tc1#rnd-1_family-123	13.1	+	0
MAG1_00014	165	806	DNA/TcMar-Tc1#rnd-1_family-257	14.4	-	0
MAG1_00014	12122	12216	DNA/hAT#hAT4_Av	22.6	+	17
MAG1_00014	30706	30810	DNA/RC#Helitron-N34_CGi	22.9	-	0
MAG1_00014	47049	47123	DNA/Crypton#Crypton-1_CTe	16.2	+	9
MAG1_00015	1786	1858	DNA/hAT-Charlie#hAT-9_HRo	19.7	+	8
MAG1_00015	1802	1865	DNA/hAT-Charlie#hAT-9_HRo	17.5	-	8
MAG1_00015	19873	19928	LTR/Gypsy#Gypsy-5_DPu-I	14.3	-	29
MAG1_00015	25939	26004	DNA/CMC-Transib#Transib-5_DK	21.2	-	0
MAG1_00016	11655	12551	DNA/TcMar-Tc1#rnd-5_family-2837	10.2	+	0
MAG1_00016	23849	24004	DNA/hAT-Tip100#rnd-1_family-125	12.3	-	0
MAG1_00016	29440	29470	DNA/hAT#hAT7_Av	24.4	+	0
MAG1_00017	309	438	DNA/MULE-MuDR#rnd-6_family-6270	2.3	+	0
MAG1_00017	7433	7500	DNA/PiggyBac-PB#AvPB4	16.4	-	10
MAG1_00017	7439	7529	PLE/Penelope-Athena#AthX-V-S	19.5	-	13
MAG1_00017	16577	16730	PLE/Penelope-Athena#AthW	30	+	14
MAG1_00017	18729	19961	DNA/RC#rnd-5_family-1242	5.8	+	1
MAG1_00017	32939	33029	DNA/Maverick#Polinton-8_NVi	25.9	+	0
MAG1_00017	37710	37764	LTR/Gypsy#Gypsy-613_AA-I	22.2	-	51
MAG1_00017	42409	45042	DNA/Merlin#rnd-6_family-13249	3.196	-	15
MAG1_00018	25	270	LTR/Gypsy#rnd-5_family-5060	16.7	+	19
MAG1_00018	12309	12361	LTR/Gypsy#Gypsy61-I_AG	18.9	-	564
MAG1_00018	17610	17714	LINE/I-Jockey#TART_DV	20.6	-	23
MAG1_00019	15892	15974	DNA/hAT-hobo#rnd-6_family-1756	17.8	-	0
MAG1_00019	17273	17325	LINE/CR1#CR1-49_AAe	20.8	+	7
MAG1_00019	24903	25563	DNA/Sola-2#rnd-6_family-2417	18.23	+	3
MAG1_00019	25879	26047	DNA/Sola#Sola2h_Av	33.2	+	3
MAG1_00019	30460	30580	DNA/Ginger#Ginger2c_Av	28.1	-	0
MAG1_00019	35690	35738	DNA/CMC-Transib#Transib-2_DAn	22.4	+	0
MAG1_00020	12117	14084	DNA/TcMar-Tc1#rnd-6_family-11202	1.5	+	2
MAG1_00020	15088	15452	DNA/TcMar-Tc1#rnd-1_family-53	28	+	0
MAG1_00020	18186	18890	DNA/TcMar-Tc1#Tc13_Av	32.3	+	0
MAG1_00020	21208	22075	PLE/Penelope#rnd-5_family-3177	20.3	+	205
MAG1_00020	22091	22366	PLE/Penelope-Athena#AthJ-N	29.6	-	0
MAG1_00020	22243	22535	PLE/Penelope#rnd-1_family-424	27.2	-	0
MAG1_00020	22501	22823	PLE/Penelope-Athena#AthM	31.3	-	0
MAG1_00020	42919	43237	DNA/TcMar-Mariner#Avmar5a_Av	10	+	14
MAG1_00021	27815	27844	LTR/Gypsy#Gypsy-11_LG-I	10	-	0
MAG1_00022	3117	3293	LINE/L1-Tx1#rnd-1_family-1130	6.8	-	0
MAG1_00022	15043	15652	DNA/MULE-MuDR#rnd-6_family-4779	13.6	+	13
MAG1_00022	39266	39315	LTR/Gypsy#Gypsy-38_NVi-LTR	12.5	+	4
MAG1_00022	39316	39327	PLE/Penelope-Athena#AthW1-J-R	27.1	+	4
MAG1_00023	334	427	DNA/Ginger#Ginger2d_Av	19.4	+	0
MAG1_00023	30974	31107	DNA/hAT-Blackjack#rnd-1_family-475	25.4	+	0
MAG1_00023	36310	36785	DNA/hAT-Blackjack#rnd-5_family-3103	10.5	-	0
MAG1_00024	4002	4049	DNA/Sola-1#Sola1-6_AAe	10.4	-	37
MAG1_00024	4008	4058	PLE/Penelope-Athena#AthX-V-T	11	-	36
MAG1_00024	17830	17897	DNA/CMC-EnSpm#DNA3-1_CGi	14.9	+	2
MAG1_00025	5280	5338	DNA/CMC-EnSpm#CACTA2_Av	14.3	+	2
MAG1_00025	9591	9754	DNA/hAT#hAT20_Av	24.5	-	0
MAG1_00025	28230	28294	LINE/L1#L1-40_LSal	14.3	-	1
MAG1_00025	28790	28859	DNA/TcMar-Tc1#Mariner-9_BM	19.7	-	1
MAG1_00025	39933	39977	DNA/hAT#hAT9_Av	20	-	0
MAG1_00025	40131	40902	DNA/hAT-Tip100#rnd-1_family-125	9.5	-	0
MAG1_00026	3	111	DNA/TcMar-Tc1#Tc13_Av	23.9	-	0
MAG1_00026	990	2702	DNA/MULE-MuDR#rnd-6_family-2079	17.5	-	26
MAG1_00026	4317	4364	DNA/MULE-MuDR#rnd-6_family-6270	18.8	+	2
MAG1_00026	22863	24177	DNA/TcMar-Tc1#Tc21_Av	19.1	-	42
MAG1_00027	20097	20537	DNA/TcMar-Tc1#rnd-1_family-53	23.6	+	3
MAG1_00027	20371	20569	DNA/TcMar-Tc1#rnd-1_family-257	25	-	3
MAG1_00027	20596	21022	DNA/TcMar-Tc1#rnd-1_family-53	22.2	-	3
MAG1_00028	164	363	DNA/hAT#hAT20_Av	18.4	-	0
MAG1_00028	35961	36019	PLE/Penelope#Penelope-5_HRo	18.6	+	9
MAG1_00028	35976	36052	LTR/Copia#Copia-65_AA-I	20.8	-	14
MAG1_00028	40075	40464	DNA/TcMar-Pogo#pogo2_Av	22.4	-	0
MAG1_00029	7839	7921	PLE/Penelope-Athena#AthW	20.5	+	0
MAG1_00029	37212	37296	LTR/Gypsy#Gypsy-622_AA-I	23.5	-	10
MAG1_00030	18613	18699	LTR/Gypsy#Gypsy-3_DPer-I	21.1	+	13
MAG1_00030	30461	30553	DNA/TcMar-Tc1#Mariner-79B_HSal	22.2	-	0
MAG1_00030	30484	30583	DNA/Maverick#Polinton-8_NVi	24.2	+	0
MAG1_00030	36188	36233	DNA/CMC-Chapaev-3#EnSpm-3N1_RPr	17.4	+	0
MAG1_00030	38111	38246	LINE/R1#RT1	32.6	+	86
MAG1_00030	38135	38289	LINE/I-Jockey#TART_DV	20	+	89
MAG1_00031	7940	9054	DNA/MULE-MuDR#MuDR3_Av	18.015	-	0
MAG1_00031	9571	10581	LINE/RTE#RTE1_Av	31.6	-	0
MAG1_00031	17252	17293	DNA/RC#Heli2_Av_cons	14.3	+	0
MAG1_00031	28699	28746	LTR/Copia#Copia-4_DMoj-I	18.8	+	4
MAG1_00032	13054	13104	DNA/MULE-MuDR#rnd-5_family-5337	11.8	+	0
MAG1_00032	13105	14045	DNA/MULE-MuDR#rnd-5_family-5337	4.2	-	6
MAG1_00032	18798	18906	LTR/Pao#rnd-6_family-2551	8.3	-	0
MAG1_00032	21842	24026	DNA/MULE-MuDR#MULE5_Av	31.404	-	4
MAG1_00032	21846	24021	DNA/MULE-MuDR#MULE5_Av	19.297	+	4
MAG1_00032	22041	22511	DNA/MULE-MuDR#rnd-5_family-979	28.6	+	2
MAG1_00032	24868	26730	DNA/Sola#Sola2g_Av	29	-	0
MAG1_00032	28348	28788	DNA/PiggyBac-Pokey#Pokey4_Av	25.458	+	7
MAG1_00033	6069	6515	DNA/hAT-Tip100#rnd-5_family-2318	1.8	-	1
MAG1_00033	22158	22196	DNA/hAT-Ac#rnd-5_family-5115	7.7	+	0
MAG1_00034	12742	12796	DNA/Maverick#Polinton-6_NVi	18.2	+	40
MAG1_00034	27702	28080	DNA/TcMar-Tc1#rnd-1_family-53	31.1	+	0
MAG1_00034	28115	28619	DNA/TcMar-Tc1#rnd-1_family-53	30.9	-	0
MAG1_00035	205	303	DNA/Sola#Sola2c_Av	23.2	+	0
MAG1_00035	839	1053	DNA/hAT-hAT5#rnd-5_family-4512	18.8	-	0
MAG1_00035	5337	10551	LINE/Soliton#Soliton2_Av	28.335	-	0
MAG1_00035	6661	7622	LINE/I-Jockey#rnd-1_family-471	22.4	-	0
MAG1_00035	12454	13533	DNA/hAT-Ac#rnd-5_family-1273	4.2	-	0
MAG1_00035	19869	19984	DNA/Ginger#Ginger2c_Av	21.1	-	1
MAG1_00035	29959	30039	DNA/TcMar-Pogo#pogo2_Av	18.5	+	13
MAG1_00036	467	869	DNA/TcMar-Pogo#pogo4_Av	25.9	+	0
MAG1_00036	1524	2608	DNA/TcMar-Mariner#Avmar5_Av	23.2	+	2
MAG1_00036	10684	10753	DNA/hAT-Tip100#rnd-6_family-141	16.4	-	0
MAG1_00036	26410	26517	PLE/Penelope-Athena#AthW	30.8	+	0
MAG1_00036	32407	32586	LTR/Unknown#ltr-1_family-1	24.5	-	1
MAG1_00037	5	851	DNA/Ginger#Ginger2a_Av	13.1	-	195
MAG1_00037	1877	1923	DNA/PiggyBac#piggyBac-5_CGi	15.6	+	0
MAG1_00037	5264	5326	LTR/Gypsy#Gypsy-75_LMi-LTR	18.7	+	48
MAG1_00037	36575	36626	PLE/Penelope-Athena#AthK-V	18	-	7
MAG1_00038	298	743	DNA/MULE-MuDR#MULE2_Av	28.2	+	0
MAG1_00038	2095	2134	LTR/Gypsy#Gypsy-9_PBa-I	12.5	+	0
MAG1_00038	7243	7314	DNA#DNA3-14_CGi	18.7	+	1
MAG1_00038	7262	7325	DNA/TcMar-Tc1#Mariner-N6_SIn	16.7	+	2
MAG1_00038	31956	32007	DNA/TcMar-Tc2#Mariner37_CB	11.8	+	60
MAG1_00039	8868	9059	DNA/TcMar-Tc1#rnd-1_family-297	20.6	+	1
MAG1_00039	9447	9620	DNA/TcMar-Tc1#rnd-1_family-297	18.5	-	0
MAG1_00039	10057	10100	LTR/Pao#CER15-I_CE	9.8	-	0
MAG1_00040	82	145	DNA#DNA2-7_CGi	25	-	0
MAG1_00040	96	169	DNA/TcMar-Tc1#Mariner-N6_SIn	23.3	-	0
MAG1_00040	29934	30122	DNA/TcMar-Tc1#rnd-5_family-6732	29.3	-	0
MAG1_00041	2893	2933	LINE/I#I-7B_AAe	14.6	+	0
MAG1_00041	11322	11416	PLE/Penelope-Athena#AthL1a	23.4	-	17
MAG1_00041	11379	11418	LINE/R1#RTAg4	15	-	13
MAG1_00042	12647	12711	PLE/Penelope-Athena#AthP1	21.9	-	0
MAG1_00042	13987	14011	PLE/Penelope-Athena#AthJ-N-W1	31.5	-	0
MAG1_00042	18415	18472	DNA/TcMar-Pogo#pogo3_Av	17.8	-	6
MAG1_00042	31495	31560	DNA#DNA2-7_CGi	14.3	+	0
MAG1_00042	31505	31599	DNA#DNA-11_CGi	17.7	-	0
MAG1_00042	31525	31585	DNA/CMC-EnSpm#DNA3-1_CGi	21.3	+	0
MAG1_00043	3561	3654	DNA/hAT#hAT19_Av	21.4	-	0
MAG1_00043	9757	9846	LINE/L2#L2-8_NVi	25.6	-	0
MAG1_00043	14886	14948	LINE/I#I-7_AAe	18	-	14
MAG1_00043	34245	34308	DNA/RC#Heli3_Av	17.1	+	0
MAG1_00043	34369	34392	DNA/hAT#hAT9_Av	20	+	0
MAG1_00044	6744	6838	PLE/Penelope-Athena#AthW1	23.9	+	0
MAG1_00044	35382	35539	DNA/Ginger#Ginger2d_Av	12	+	0
MAG1_00045	8929	9035	DNA/TcMar-Tc1#Mariner-25_DF	12.6	-	0
MAG1_00045	13713	13768	LINE/L2#L2-8_NVi	16.4	-	0
MAG1_00045	13723	13802	DNA/Kolobok-T2?#Kolobok-N1_AEc	22.1	-	0
MAG1_00045	13769	13784	DNA/Kolobok-T2#Kolobok-2_AP	26.1	-	0
MAG1_00045	15040	15074	LTR/Gypsy#Gypsy-13_CFl-I	2.6	+	2
MAG1_00045	20572	20635	DNA/Maverick#Polinton-8_NVi	26.8	-	15
MAG1_00045	24613	24679	DNA/Maverick#Polinton-2_ACe	12.1	+	17
MAG1_00045	35367	35455	LTR/Pao#RETRO1_AG_LTR	19.3	-	0
MAG1_00046	178	222	DNA/PiggyBac-PB#AvPB1	20	-	0
MAG1_00046	7405	7629	PLE/Penelope-Athena#AthV-L1	21.4	+	0
MAG1_00046	17860	18223	DNA/hAT-Ac#rnd-1_family-427	28.7	-	0
MAG1_00047	1044	1098	PLE/Penelope-Athena#AthL1a	20	-	46
MAG1_00048	4514	4786	DNA/hAT-Ac#rnd-5_family-1273	30	+	0
MAG1_00049	5045	5174	PLE/Penelope-Athena#AthK-V	29.5	+	0
MAG1_00049	5276	5493	DNA/P#P9_Av	27.9	-	0
MAG1_00050	18752	18887	DNA/TcMar-Tc1#rnd-5_family-279	24.3	+	2
MAG1_00050	19536	19832	DNA/TcMar-Tc1#PrD37D	33.6	+	2
MAG1_00050	19602	19749	PLE/Penelope-Athena#AthJ-N-W1	32.9	+	2
MAG1_00050	32840	32900	DNA/RC#Heli3a_Av	20	-	0
MAG1_00051	961	1935	DNA/Sola#Sola2b_Av	30.9	+	5
MAG1_00051	1989	2305	DNA/Sola#Sola2b_Av	28.8	-	5
MAG1_00051	29481	30793	DNA/PiggyBac-Looper#Looper3_Av	27.3	+	0
MAG1_00052	225	269	DNA/hAT#hAT9_Av	21.7	+	0
MAG1_00052	3903	4292	DNA/PIF-ISL2EU#ISL2EU2_Av	29.2	+	0
MAG1_00052	3987	4292	DNA/PIF-ISL2EU#ISL2EU2_Av	28	-	0
MAG1_00052	5835	6348	DNA/MULE-MuDR#rnd-6_family-768	31.801	-	4
MAG1_00052	7061	7108	PLE/Penelope-Athena#AthW	16.7	-	0
MAG1_00052	12316	12502	DNA/TcMar-Tigger#Tigger_Av	27.9	+	3
MAG1_00052	13258	13325	DNA/TcMar-Pogo#rnd-6_family-7039	8.8	+	3
MAG1_00052	14122	14187	LINE/Proto2#Proto2-12_CTe	19.7	-	3
MAG1_00052	17383	17423	DNA/hAT-Tip100#rnd-1_family-1428	17.1	+	3
MAG1_00052	28836	29440	DNA/TcMar-Tc1#rnd-1_family-1349	33.6	-	0
MAG1_00052	31059	31389	DNA/TcMar-Tc1#rnd-5_family-2612	17.3	+	0
MAG1_00052	31392	32190	DNA/TcMar-Tc1#rnd-1_family-692	15.7	+	0
MAG1_00053	4146	4209	DNA/TcMar-Mariner#Mariner-35_AEc	16.3	-	0
MAG1_00054	7514	7650	DNA/Maverick#Polinton-8_NVi	28.2	-	0
MAG1_00054	11835	11888	LINE/I#Nimb-40_LMi	22.2	+	1
MAG1_00054	16398	16493	DNA/MULE-MuDR#MULE3_Av	26	+	1
MAG1_00054	26275	26510	DNA/TcMar-Tc2#Mariner22_CB	27.5	+	6
MAG1_00054	29916	29986	LTR/Copia#Copia-1_RP-LTR	11.3	+	2
MAG1_00055	13	128	LINE/I-Jockey#Jockey-3_DGri	26.2	+	8
MAG1_00055	31	114	LINE/R1#RTAg4	29.8	+	7
MAG1_00055	1750	1836	LTR/Pao#BEL-174_AA-I	25.7	+	16
MAG1_00056	4228	4347	DNA/Ginger-2#rnd-5_family-2901	24.4	+	0
MAG1_00056	6828	6882	DNA/Crypton#Crypton-1_CTe	13.8	-	537
MAG1_00056	6851	6886	PLE/Penelope-Athena#AthX-V-T	8.3	-	501
MAG1_00056	25645	25679	DNA/hAT-Blackjack#rnd-1_family-411	8.3	+	0
MAG1_00056	25680	26376	DNA/hAT#hAT24_Av	29.5	+	1
MAG1_00056	29345	29401	DNA/RC#Helitron-N18_CGi	22.8	+	6
MAG1_00057	16406	16427	DNA/RC#Helitron-9_CGi	18.2	-	0
MAG1_00057	16428	16470	LTR/Gypsy#Gypsy61-I_AG	11.6	+	0
MAG1_00058	5461	5515	DNA/MULE-MuDR#DNA9-2_AAe	18.2	-	0
MAG1_00058	15226	16494	DNA/TcMar-Mariner#Avmar9_Av	22.1	+	7
MAG1_00060	8082	8140	LINE/I#Nimb-28_LMi	28.8	-	0
MAG1_00061	32521	32634	DNA#rnd-1_family-789	16.7	-	1
MAG1_00062	6857	6893	LINE/RTE-RTE#RTE-11_Hmel	13.5	+	5
MAG1_00062	10247	10283	LTR/Gypsy#Gypsy-64_LMi-I	5.4	-	3
MAG1_00063	5656	5736	DNA/hAT#hAT14_Av	20.7	+	33
MAG1_00063	11724	11745	LTR/Gypsy#Gypsy-10_DVir-LTR	18.6	+	9
MAG1_00063	11746	11799	DNA/Maverick#Polinton-1_NVi	13	+	9
MAG1_00063	29462	29741	DNA/PiggyBac#rnd-5_family-4706	31.7	-	0
MAG1_00063	30949	30964	LTR/Gypsy#Gypsy-30_LMi-LTR	21.8	+	0
MAG1_00064	11798	11962	PLE/Penelope#Penelope1_Av	31.7	+	0
MAG1_00064	11994	12093	PLE/Penelope#Penelope1a_Av	24.2	+	0
MAG1_00065	891	1016	PLE/Penelope#Penelope1a_Av	25	-	0
MAG1_00065	9812	10501	DNA/RC#rnd-1_family-576	8.882	+	5
MAG1_00065	9893	10429	DNA/hAT-Blackjack#rnd-1_family-475	4.1	-	5
MAG1_00065	10512	10669	DNA/PIF-Harbinger#Harbinger3_Av	29.5	-	0
MAG1_00065	10947	11057	DNA/P#P7_Av	27.9	+	0
MAG1_00065	13572	14979	LTR/Pao#rnd-6_family-2551	20.4	-	503
MAG1_00065	24907	25270	DNA/hAT-Tip100#rnd-1_family-125	15.6	-	0
MAG1_00066	21644	22257	DNA/RC#rnd-1_family-576	12.79	+	2
MAG1_00066	21692	22222	DNA/hAT-Blackjack#rnd-1_family-475	4	-	2
MAG1_00066	23975	24685	DNA/Sola-2#rnd-6_family-2417	25.551	+	3
MAG1_00066	24686	24751	DNA/Sola#Sola2h_Av	31.9	+	3
MAG1_00066	29167	29202	PLE/Penelope-Athena#AthW1-J-R	13.9	+	300
MAG1_00066	32349	32490	DNA/MULE-MuDR#MULE5_Av	15.1	-	0
MAG1_00067	17337	17532	DNA/TcMar-Pogo#Mariner-10_CGi	33	-	2
MAG1_00067	29407	29466	DNA/hAT#hAT23_Av	16.9	+	0
MAG1_00067	30151	30304	PLE/Penelope-Athena#AthW	31.3	-	91
MAG1_00068	23832	23895	DNA/CMC-EnSpm#rnd-1_family-506	12.7	+	0
MAG1_00068	25164	25300	DNA/TcMar-Mariner#Avmar4_Av	32.9	-	0
MAG1_00068	25590	25634	DNA/TcMar-Tc1#Tc5_cons_Av	17.8	+	0
MAG1_00068	27213	27366	DNA/TcMar-Mariner#Avmar8_Av	25.1	-	2
MAG1_00069	325	25951	PLE/Penelope-Athena#AthW1-J-R	28.553	+	29
MAG1_00069	1985	3199	PLE/Penelope-Athena#AthW1	21.824	+	0
MAG1_00069	2130	2199	LTR/Copia#Copia-106_AA-I	25.7	+	0
MAG1_00069	3056	3932	PLE/Penelope-Athena#AthL3	26.5	-	0
MAG1_00069	3198	4073	PLE/Penelope-Athena#AthJ-N-W1	24.4	+	2
MAG1_00069	4357	4429	PLE/Penelope-Athena#AthW-J	15.2	+	0
MAG1_00069	7272	7365	PLE/Penelope-Athena#AthW1-J-R	16.8	-	0
MAG1_00069	7556	7613	LTR/Gypsy#Gypsy14-LTR_Dpse	21.8	+	0
MAG1_00069	7818	8129	PLE/Penelope-Athena#AthW1	27.2	+	5
MAG1_00069	11832	11927	DNA/Ginger#Ginger2c_Av	21.2	+	0
MAG1_00069	11928	11950	PLE/Penelope-Athena#AthV-L1	11	-	0
MAG1_00069	12087	12392	PLE/Penelope-Athena#AthJ-W	27.6	+	0
MAG1_00069	12645	12693	DNA/PIF-Harbinger#Harbinger-6_CGi	14.6	+	0
MAG1_00069	15672	17587	PLE/Penelope-Athena#AthW	27.65	+	2
MAG1_00069	18805	19922	PLE/Penelope#rnd-5_family-1284	27.9	+	0
MAG1_00069	22252	22506	PLE/Penelope-Athena#AthJ-W	24.3	+	3
MAG1_00069	26133	27191	PLE/Penelope-Athena#AthW-J	28.4	+	0
MAG1_00070	16088	16247	LTR/Gypsy#ltr-1_family-5	22.4	+	2
MAG1_00070	16133	16319	LTR/Gypsy#ltr-1_family-5	22.9	-	2
MAG1_00071	989	1407	PLE/Penelope-Athena#AthL3	19.2	-	0
MAG1_00071	1821	1894	DNA/Maverick#Polinton-9_NVi	17.6	-	0
MAG1_00071	1831	1904	DNA#DNA-11_CGi	20.3	+	0
MAG1_00071	7908	11695	DNA/RC#rnd-5_family-1202	22.8	-	0
MAG1_00071	13542	18735	DNA/MULE-MuDR#rnd-5_family-2880	28.723	-	1
MAG1_00071	32252	32311	PLE/Penelope#Penelope2a_Av	16.5	-	0
MAG1_00072	5760	5807	LTR/Gypsy#Gypsy-23_DBp-I	16.7	+	194
MAG1_00072	9703	9764	DNA/Maverick#Polinton-2_TC	9	-	1
MAG1_00072	14963	15022	DNA/TcMar-Pogo#pogo11_Av	25.4	-	0
MAG1_00072	16710	16814	DNA#rnd-1_family-789	15.2	+	0
MAG1_00072	26571	26623	DNA/RC#Helitron-N46_CGi	14.4	+	2
MAG1_00072	26624	26640	DNA/TcMar-Tc1#Mariner-N22_AG	28.6	+	2
MAG1_00072	29786	30456	DNA/TcMar-Mariner#Avmar5_Av	32.6	+	0
MAG1_00072	32154	32247	DNA/hAT#hAT15_Av	20.1	-	0
MAG1_00073	8897	9063	PLE/Penelope-Athena#AthW	26.9	-	5
MAG1_00073	25374	25406	LINE/CR1#CR1_Ele42	15.2	+	48
MAG1_00073	29196	29250	DNA/hAT-Ac#rnd-6_family-3573	13.5	+	0
MAG1_00073	29220	29287	LTR/Gypsy#Gypsy-6_AEc-I	25	-	0
MAG1_00074	13886	13952	LTR/Copia#Copia-65_AA-I	21.2	+	0
MAG1_00074	13898	13953	LINE/CR1#CR1-16_HRo	16.1	+	0
MAG1_00074	13913	13967	DNA/hAT-Charlie#hAT-11_HRo	20	+	0
MAG1_00074	23107	23245	DNA/Maverick#Polinton-8_NVi	29.7	-	0
MAG1_00075	10123	10833	DNA/hAT#hAT1_Av	18.372	-	0
MAG1_00075	26127	26169	LTR/TelKA#TelKA3b_Av	13.9	-	39
MAG1_00075	31306	31740	LTR/Gypsy#rnd-5_family-5060	22.7	-	0
MAG1_00076	21209	21274	DNA/MULE-NOF#Rehavkus-1_TC	21.5	+	0
MAG1_00076	23097	23251	PLE/Penelope-Athena#AthL3	24.6	-	3
MAG1_00076	23135	23287	LINE/I-Jockey#TART_DV	25.8	-	2
MAG1_00076	31919	31955	LTR/Gypsy#Gypsy-10_DPu-I	13.5	+	0
MAG1_00077	644	816	LINE/L1-Tx1#rnd-1_family-1130	5.2	-	0
MAG1_00077	26337	26388	LINE/R1#TRAS-3_TUr	11.8	-	45
MAG1_00077	26349	26398	PLE/Penelope-Athena#AthW2-2	10.6	+	46
MAG1_00078	9938	9982	DNA/TcMar-Tc4#Mariner3-3_HSal	11.7	-	1
MAG1_00078	20340	20424	LINE/RTE-BovB#rnd-1_family-361	27.1	+	0
MAG1_00079	19285	19356	DNA/MULE-MuDR#MULE5_Av	12.5	-	0
MAG1_00079	19294	19436	LINE/L1#L1-43_AAe	21.4	+	0
MAG1_00079	19383	19445	DNA/MULE-MuDR#MULE5_Av	6.3	+	0
MAG1_00079	29093	29168	LTR/Pao#rnd-6_family-2551	27.6	-	358
MAG1_00080	6435	6508	DNA/hAT-Charlie#hAT-9_HRo	16.2	+	7
MAG1_00080	7041	7120	LTR/Copia#Copia-65_AA-I	20.8	-	3
MAG1_00080	7070	7130	DNA/Maverick#Polinton-1_NVi	13.1	-	3
MAG1_00080	7131	7152	LTR/Gypsy#Gypsy6-NVi_LTR	20.9	-	3
MAG1_00080	8495	8588	DNA/RC#Helitron-N35_CGi	22.8	-	0
MAG1_00080	12681	12777	LINE/L1-Tx1#Tx1-1_CGi	12.6	-	8
MAG1_00080	12701	12720	DNA/PIF-Harbinger#DNA3-13B_CGi	16.1	-	8
MAG1_00080	12784	12794	DNA#DNA3-4_CGi	8.3	-	8
MAG1_00080	18553	18737	DNA/MULE-MuDR#DNA9-2_AAe	26.4	+	1
MAG1_00080	18933	19014	DNA/MULE-MuDR#DNA9-2_AAe	17.3	-	1
MAG1_00081	10067	10183	DNA/Ginger#Ginger2b_Av	15.7	-	0
MAG1_00081	10103	10141	DNA/Ginger-2#rnd-6_family-2807	16	+	0
MAG1_00081	10142	10607	DNA/Ginger-2#rnd-6_family-2807	3.113	-	0
MAG1_00081	10589	10636	DNA/Ginger#Ginger2b_Av	14.6	+	0
MAG1_00081	12102	12173	LINE/I-Jockey#TART_DV	12.5	-	2
MAG1_00081	12107	12204	LTR/Pao#ROO_I	26.8	-	2
MAG1_00081	21941	21996	PLE/Penelope#Penelope-5_HRo	21.4	+	1
MAG1_00082	8734	8774	LTR/Gypsy#Gypsy-11_DBp-I	7.5	+	7
MAG1_00083	7668	7720	LINE/CR1#CR1-110_AAe	16.1	-	291
MAG1_00083	13341	13356	DNA/IS3EU#IS3EU-N1_CGi	25.3	-	9
MAG1_00083	13357	13411	DNA/Maverick#Polinton-9_NVi	18.2	-	6
MAG1_00084	2596	2646	PLE/Penelope-Athena#AthW	30.1	-	1
MAG1_00084	9134	9200	DNA/PiggyBac-PB#AvPB1	15.2	+	0
MAG1_00084	10550	10672	DNA/PIF-Spy#rnd-1_family-1308	25.2	+	0
MAG1_00084	13011	14429	DNA/hAT#hAT28_Av	30.013	-	1
MAG1_00084	15295	15388	DNA/hAT-Ac#rnd-4_family-2748	21.7	-	0
MAG1_00084	20789	21863	DNA/hAT-Tip100#rnd-5_family-2873	32.287	+	0
MAG1_00084	24998	26306	DNA/TcMar-Tc1#rnd-1_family-123	13.2	+	3
MAG1_00084	25261	25900	DNA/TcMar-Tc1#rnd-1_family-257	14.3	-	1
MAG1_00085	1	152	DNA/hAT-Blackjack#rnd-1_family-475	5.9	-	0
MAG1_00086	10592	10614	DNA/RC#Heli3a_Av	26	-	12
MAG1_00087	10627	10680	DNA/TcMar-Tc1#Mariner-N34_RPr	15.1	+	5
MAG1_00087	13178	13276	DNA/MULE-MuDR#rnd-5_family-1720	21.9	-	0
MAG1_00087	15389	15427	LTR/Gypsy#Gypsy-3_DWil-I	10.3	+	5
MAG1_00087	16245	16329	LTR/Gypsy#Gypsy-18_PBa-I	15.4	-	0
MAG1_00087	29509	31258	LINE/RTE#RTE4_Av	27	-	0
MAG1_00089	21772	21819	LTR/Gypsy#Gypsy14-LTR_Dpse	15.7	+	0
MAG1_00089	24432	24543	DNA#DNA2-10_CGi	19.2	+	0
MAG1_00090	6932	7276	DNA/MULE-MuDR#MuDR6_Av	26.469	-	0
MAG1_00090	13072	13597	DNA/hAT-hobo#rnd-1_family-1043	11.873	+	0
MAG1_00090	24200	24263	LTR/Gypsy#Gypsy-27_DPu-I	22.2	+	0
MAG1_00091	3084	3204	DNA/hAT#hAT5_Av	25.4	+	0
MAG1_00091	27255	27370	DNA#DNA3-10_CGi	21.6	+	0
MAG1_00092	742	1059	LTR/Gypsy#rnd-6_family-2609	8.8	-	0
MAG1_00092	1060	1368	LTR/Juno-Vesta#Vesta3_Av	31.4	-	0
MAG1_00092	1231	1942	LTR/Gypsy#rnd-5_family-955	23.3	-	0
MAG1_00092	1377	1926	LTR/Juno-Vesta#Vesta6a_Av	27	-	0
MAG1_00092	2317	3120	LTR/Gypsy#rnd-5_family-1797	11.536	+	0
MAG1_00092	4267	4386	DNA/MULE-MuDR#MULE5_Av	12.2	-	0
MAG1_00092	4303	4399	DNA/MULE-MuDR#MULE5_Av	9.6	+	0
MAG1_00092	4957	5451	DNA/MULE-MuDR#rnd-5_family-968	24.7	-	0
MAG1_00092	5771	6018	PLE/Penelope-Athena#AthX-V-T	28.3	-	0
MAG1_00092	6455	6586	DNA/TcMar-Pogo#pogo7_Av	23.4	-	0
MAG1_00092	15006	15248	PLE/Penelope-Athena#AthJ-N-W1	33.1	+	0
MAG1_00093	6263	6330	LTR/Gypsy#Gypsy68-I_AG	22.1	+	0
MAG1_00094	425	477	DNA/CMC-Chapaev-3#Chapaev3-1_HR	17	+	0
MAG1_00094	21264	21414	DNA/Crypton#Crypton-1_CTe	23.7	+	10
MAG1_00094	21365	21423	DNA/RC#Helitron-9_CGi	20.3	+	9
MAG1_00095	13765	13845	DNA/RC#Helitron-1_NVi	19.2	+	4
MAG1_00095	17380	17440	PLE/Penelope-Athena#AthW2-2	13.8	+	1
MAG1_00095	17408	17448	LTR/Gypsy#Gypsy61-I_AG	14.6	+	1
MAG1_00095	21534	21590	LINE/RTE-BovB#RTE-30_LMi	16.4	-	0
MAG1_00095	21710	21738	LTR/Gypsy#Gypsy-22_CGi-I	6.9	-	0
MAG1_00096	152	475	DNA/TcMar-Tc1#rnd-5_family-2612	17.6	+	0
MAG1_00096	478	1279	DNA/TcMar-Tc1#rnd-1_family-692	18.9	+	0
MAG1_00096	1782	1889	DNA/CMC-EnSpm#CACTA8_Av	15.2	+	1
MAG1_00096	14083	14124	DNA/hAT#hAT13_Av	7.1	+	0
MAG1_00096	20616	20670	DNA/RC#Helitron-1_DVir	11.3	-	1
MAG1_00096	20947	21000	LTR/Gypsy#Gypsy-12_DVir-I	15.1	+	1
MAG1_00098	5701	5985	DNA/hAT-Tip100#rnd-1_family-700	10.5	+	0
MAG1_00098	9063	9100	DNA/MULE-MuDR#rnd-6_family-768	15.8	+	0
MAG1_00098	9089	9215	DNA/MULE-MuDR#rnd-6_family-768	21.4	-	0
MAG1_00098	9247	9326	LTR/Gypsy#rnd-5_family-5060	19	+	0
MAG1_00098	14189	14231	DNA/PiggyBac-PB#AvPB1	18.6	-	0
MAG1_00098	17977	18015	DNA/hAT-Tip100#hAT-6_HRo	7.7	+	2
MAG1_00099	2498	2511	LTR/Gypsy#Gypsy-30_LMi-LTR	21.2	-	1
MAG1_00099	16731	16931	LINE/Soliton#Soliton4_Av	26.6	-	212
MAG1_00100	533	837	PLE/Penelope-Athena#AthP1	30.4	+	0
MAG1_00100	10172	10224	PLE/Penelope-Athena#AthW1-J-R	15.1	-	0
MAG1_00100	23810	23861	PLE/Penelope-Athena#AthW	15.4	+	0
MAG1_00100	28646	28754	DNA/MULE-MuDR#MULE2_Av	27.6	+	0
MAG1_00101	28174	28246	LTR/Gypsy#Gypsy19-I_AG	15.5	+	2
MAG1_00102	26199	26245	DNA/CMC-Transib#TRANSIB1_AG	13.1	+	2
MAG1_00103	15112	15151	LINE/R2#R2-1_TSP	12.5	-	0
MAG1_00103	16510	16560	LINE/R1#TRAS1	15.7	+	0
MAG1_00103	16523	16571	LINE/L2#L2-8_NVi	14.3	+	0
MAG1_00104	9997	10117	LINE/I-Jockey#Jockey-6_DK	27.8	-	0
MAG1_00104	26363	26413	DNA/Sola#Sola2d_Av	18	+	0
MAG1_00104	29227	29432	PLE/Penelope-Athena#AthX-V-T	28.6	-	5
MAG1_00105	380	999	DNA/RC#rnd-1_family-576	10.628	+	0
MAG1_00105	419	963	DNA/hAT-Blackjack#rnd-1_family-475	4.5	-	0
MAG1_00105	1261	1323	DNA/RC#Helitron-like-6b_Hmel	19.4	+	0
MAG1_00105	2232	2274	DNA/P#P5_Av	13.9	+	3
MAG1_00105	23226	23518	DNA/hAT#hAT2_Av	26.1	+	58
MAG1_00107	10737	10831	LINE/R1#RT1	21.5	+	27
MAG1_00107	10768	10839	LTR/Gypsy#Gypsy-1_AC-I	26.6	+	23
MAG1_00107	10824	10872	LINE/I-Jockey#TART_DV	20.7	+	12
MAG1_00107	21198	21379	LINE/L1-Tx1#rnd-1_family-1130	9	+	1
MAG1_00107	22547	22718	LINE/L1-Tx1#rnd-1_family-1130	7	-	0
MAG1_00108	605	1938	LTR/Gypsy#rnd-5_family-380	15.8	-	0
MAG1_00109	441	528	PLE/Penelope#Penelope-47_LMi	25	+	13
MAG1_00109	14059	14125	DNA/hAT#hAT9_Av	14.6	+	0
MAG1_00110	1436	1528	DNA/CMC-EnSpm#EnSpm2_Av	33.3	-	3
MAG1_00110	29024	29200	DNA/MULE-MuDR#MuDR6_Av	27.9	-	1
MAG1_00111	1567	1654	LTR/Gypsy#Gypsy-259_AA-I	18.1	+	0
MAG1_00111	8842	8853	PLE/Penelope-Athena#AthQ	21.4	-	0
MAG1_00111	10867	10877	DNA/Kolobok#Kolobok_Av	23.5	-	0
MAG1_00111	11665	12197	DNA/P#P10_Av	29.1	+	6
MAG1_00111	12632	12922	DNA/hAT-Tip100#rnd-1_family-700	12.6	+	0
MAG1_00111	15521	15701	DNA/TcMar-Pogo#pogo5_Av	28.4	+	2
MAG1_00111	17886	17960	DNA/MULE-MuDR#MuDR13_Av	16.7	-	160
MAG1_00111	21339	21350	LTR/Juno-Vesta#Vesta5_Av	22.2	+	0
MAG1_00111	25929	26033	DNA/MULE-MuDR#rnd-6_family-4779	19.7	-	0
MAG1_00112	871	1432	DNA/TcMar-Tc1#Tc2_Av	24.947	-	0
MAG1_00112	2526	3435	DNA/TcMar-Tigger#Tigger_Av	29.701	+	0
MAG1_00112	28212	28252	DNA/Sola-3#Sola3-1_Lgigantea	14.6	-	4
MAG1_00113	12938	12967	LTR/Gypsy#Gypsy-13_LG-I	6.7	-	4
MAG1_00115	514	637	DNA/MULE-MuDR#rnd-5_family-8840	19.4	+	45
MAG1_00116	14587	14659	DNA#DNA3-4_CGi	22.9	-	45
MAG1_00116	14609	14661	PLE/Penelope#Penelope-83_LMi	12.3	-	7
MAG1_00117	14474	14590	DNA#rnd-1_family-789	19	+	0
MAG1_00117	15175	17330	LTR/Gypsy#rnd-5_family-9531	17.359	+	2
MAG1_00121	14624	14655	LTR/Gypsy#ltr-1_family-4	9.4	-	1
MAG1_00122	16493	16537	PLE/Penelope-Athena#AthL3	8.9	+	0
MAG1_00122	24196	24258	PLE/Penelope#Penelope-5_HRo	16.1	-	0
MAG1_00123	5850	6263	DNA/hAT#hAT20_Av	25.7	-	0
MAG1_00125	2080	2130	LTR/Gypsy#Gypsy-1_DGri-I	17.1	-	0
MAG1_00125	8594	8691	LTR/Gypsy#Gypsy-21_LH-I	20	+	0
MAG1_00125	23623	23788	PLE/Penelope-Athena#AthW	26.4	-	1
MAG1_00125	27141	27181	DNA/TcMar-Tigger#Tigger_Av	31.2	-	0
MAG1_00125	27182	27652	DNA/TcMar-Pogo#rnd-6_family-7039	22.8	-	0
MAG1_00126	1903	3171	DNA/TcMar-Tc1#Tc21_Av	33.6	-	0
MAG1_00126	4535	4760	PLE/Penelope-Athena#AthL3	23	-	1
MAG1_00126	6157	6211	DNA/TcMar-Tc1#Mariner-19_DAn	15.1	-	0
MAG1_00126	11157	11791	LINE/RTE-X#rnd-5_family-6782	26.7	-	0
MAG1_00126	13755	14076	DNA/MULE-MuDR#rnd-6_family-768	4	+	0
MAG1_00127	1908	1959	DNA/CMC-EnSpm#rnd-1_family-506	1.9	-	0
MAG1_00127	2038	2150	LINE/RTE#RTE2a_Av	28.8	-	0
MAG1_00127	2057	2207	LINE/RTE-BovB#RTE-21_LMi	28	-	0
MAG1_00127	2963	3946	LINE/RTE#RTE2_Av	33.8	-	2
MAG1_00127	6536	7281	DNA/hAT-Tip100#rnd-1_family-125	10.278	+	0
MAG1_00127	8343	8615	LTR/Unknown#ltr-1_family-3	0	+	0
MAG1_00127	8616	13665	LTR/Gypsy#ltr-1_family-4	0	+	0
MAG1_00127	13610	13660	LTR/Juno-Vesta#Juno3_Av	25.4	+	0
MAG1_00127	13661	13934	LTR/Unknown#ltr-1_family-3	1.5	+	0
MAG1_00127	22451	22527	DNA/TcMar-Tigger#Tigger2_Av	23.4	-	1
MAG1_00128	4031	4056	LTR/Copia#Copia-14_AA-I	3.9	-	5
MAG1_00128	9439	9517	LTR/Gypsy#Gypsy-29_DPu-I	17.9	-	2
MAG1_00129	11426	11516	PLE/Penelope-Athena#AthP1	26.1	+	8
MAG1_00129	14486	14531	LINE/L2#L2-12_HRo	15.6	-	17
MAG1_00129	19247	19580	DNA/hAT-Blackjack#rnd-6_family-4038	20.163	-	9
MAG1_00130	11	116	LINE/RTE#RTE1_Av	26.7	+	0
MAG1_00130	1259	2923	DNA/TcMar-Tc1#rnd-5_family-5493	9.8	-	4
MAG1_00130	7557	7734	LINE/L1-Tx1#rnd-1_family-1130	11.1	+	0
MAG1_00130	8699	8880	LINE/L1-Tx1#rnd-1_family-1130	11.3	-	0
MAG1_00130	21467	21485	LTR#Gypsy-25_PBa-LTR	27.5	+	4
MAG1_00131	9628	9682	LTR/Gypsy#Gypsy6-NVi_LTR	16.4	+	1
MAG1_00131	17011	17112	DNA/Crypton-A#Crypton-8_CGi	27.1	-	40
MAG1_00132	9432	9563	DNA/MULE-MuDR#MuDR7_Av	27.7	-	0
MAG1_00132	9498	9582	DNA/MULE-MuDR#MuDR7_Av	18.8	+	0
MAG1_00132	10764	10805	LTR/Gypsy#Gypsy6-NVi_LTR	7.1	-	7
MAG1_00132	14967	15037	DNA/hAT-Ac#hAT-2_AG	25.4	-	11
MAG1_00132	17756	17808	PLE/Penelope-Athena#AthW	20.8	-	14
MAG1_00132	21133	22461	DNA/hAT-Ac#rnd-5_family-1273	5.37	-	2
MAG1_00133	1321	1861	DNA/TcMar-Pogo#pogo3_Av	24.086	+	0
MAG1_00133	1862	3542	DNA#rnd-6_family-895	12.3	+	0
MAG1_00133	6544	6594	LINE/L2#L2-7_HRo	12.2	-	0
MAG1_00134	3887	4021	DNA/Ginger#Ginger2c_Av	24.1	-	9
MAG1_00134	4168	4556	DNA/Ginger#Ginger2c_Av	26.1	+	9
MAG1_00134	11291	11304	LINE/L2#Daphne-58_LMi	20.8	+	0
MAG1_00134	11305	11365	LTR/Gypsy#Gypsy-8_ACe-LTR	11.7	-	0
MAG1_00134	11319	11400	LINE/L2#L2-8_NVi	18.8	-	0
MAG1_00134	16191	16228	DNA#DNA-11_CGi	10.5	+	3
MAG1_00134	17291	17348	DNA#DNA-11_CGi	14.5	-	43
MAG1_00134	24997	25139	DNA/MULE-MuDR#rnd-6_family-6270	26.4	-	0
MAG1_00136	26	66	PLE/Penelope-Athena#AthW2-2	12.2	+	9
MAG1_00136	4663	4772	DNA/TcMar-Sagan#rnd-5_family-2390	22.6	-	0
MAG1_00136	9899	11168	DNA/TcMar-Mariner#Avmar11_Av	36.536	+	0
MAG1_00136	10176	11884	DNA/TcMar-Sagan#rnd-5_family-2390	29.879	+	0
MAG1_00136	25402	25580	DNA/Ginger#Ginger2d_Av	24.6	+	0
MAG1_00137	7426	7531	DNA/hAT-Tip100#rnd-1_family-700	27.9	-	0
MAG1_00137	7772	7980	DNA/hAT#hAT31_Av	31.2	+	4
MAG1_00137	9134	9196	LINE/L2#L2B-3_AAe	18.1	-	1
MAG1_00137	14616	14702	DNA/PIF-ISL2EU#ISL2EU-11_CGi	19.7	+	1
MAG1_00137	15650	15753	DNA/hAT-Ac#rnd-5_family-2077	24	-	1
MAG1_00137	23623	23848	LTR/Gypsy#ltr-1_family-5	23.6	+	12
MAG1_00137	26386	26972	DNA/hAT-Blackjack#rnd-1_family-411	5.6	+	7
MAG1_00138	1	424	DNA/TcMar-Tc1#rnd-1_family-1339	29.1	-	0
MAG1_00140	1595	1724	PLE/Penelope-Athena#AthL3	24	+	0
MAG1_00140	2517	3996	PLE/Penelope-Athena#AthJ-N-W1	36.017	-	0
MAG1_00140	2789	2944	DNA/CMC-EnSpm#EnSpm1_Av	33.1	+	0
MAG1_00140	8268	8366	PLE/Penelope#Penelope-6_HRo	13.5	+	1
MAG1_00140	8279	8369	DNA/hAT-Charlie#hAT-11_HRo	8	+	1
MAG1_00140	8311	8386	DNA/P#P-2_Hrobusta	6.8	+	1
MAG1_00140	16269	16310	DNA#DNA3-4_CGi	11.9	-	0
MAG1_00140	18589	19249	DNA/RC#rnd-1_family-576	9.122	-	2
MAG1_00140	18661	19198	DNA/hAT-Blackjack#rnd-1_family-475	2.6	+	2
MAG1_00141	1	66	DNA/MULE-MuDR#rnd-5_family-8840	14.1	-	0
MAG1_00141	21371	21432	LTR/Gypsy#Gypsy-24_LSal-I	24.6	+	0
MAG1_00141	25016	25067	LTR/Pao#BEL-11_LG-I	17.3	-	0
MAG1_00142	10031	10115	DNA/Maverick#Polinton-2_ACe	19.3	-	81
MAG1_00142	12049	12105	DNA/Ginger#Ginger1-1_AC	17.9	+	9
MAG1_00142	25116	25173	LTR/Pao#CER13-I_CE	23.7	-	1683
MAG1_00144	537	646	DNA/CMC-EnSpm#EnSpm2_Av	31.8	-	0
MAG1_00144	3503	3605	DNA/TcMar-Tc1#PrD37D	28.2	-	0
MAG1_00144	10297	10370	PLE/Penelope-Athena#AthW2-2	27.4	-	13
MAG1_00144	10518	10610	DNA/Crypton#Crypton-1_CTe	18.8	-	19
MAG1_00144	10602	10641	PLE/Penelope-Athena#AthW1-J-R	18.8	+	13
MAG1_00144	26875	27021	DNA/hAT-Tip100#rnd-1_family-700	9.5	-	0
MAG1_00145	9383	9441	DNA/TcMar-Tc1#Tc1A	15.2	+	0
MAG1_00145	19806	19859	LTR/Gypsy#Gypsy-134_AA-I	19.3	-	0
MAG1_00146	11103	11131	DNA/PiggyBac#piggyBac-2_HRo	3.5	+	11
MAG1_00146	21306	21831	DNA/TcMar-Tc1#rnd-1_family-53	15.6	+	2
MAG1_00146	21812	22549	DNA/TcMar-Tc1#rnd-1_family-123	17.4	+	0
MAG1_00146	24478	24689	DNA/CMC-EnSpm#rnd-1_family-506	4.7	+	0
MAG1_00147	5176	5188	LINE/L2#L2-13_Hmel	19.5	-	0
MAG1_00148	8217	8268	LINE/CR1#LINE2A_CE	8.5	+	12
MAG1_00149	23534	23609	PLE/Penelope#Penelope-5_HRo	16.4	+	1
MAG1_00149	24779	25209	DNA/RC#rnd-5_family-1242	18.2	-	1
MAG1_00150	11830	12046	LINE/Soliton#Soliton6_Av	23.3	+	5
MAG1_00150	15668	15743	DNA/TcMar-Pogo#pogo3_Av	21.3	-	1
MAG1_00150	15855	16008	LTR/Gypsy#rnd-5_family-5060	20.4	+	1
MAG1_00150	18887	19009	DNA/PiggyBac#piggyBac3_Av	22.7	-	0
MAG1_00151	1478	1527	LTR/Gypsy#Gypsy-2-I_DP	16	+	132
MAG1_00152	2951	3009	PLE/Penelope#Penelope-2_PBa	19	-	46
MAG1_00152	25815	26546	LINE/Soliton#Soliton3_Av	34.3	-	0
MAG1_00153	11500	11651	DNA/TcMar-Tc1#rnd-5_family-279	20.3	-	3
MAG1_00153	11759	11839	DNA/PiggyBac#rnd-5_family-2432	30.9	-	2
MAG1_00154	15845	16055	DNA/CMC-EnSpm#rnd-1_family-506	9.9	+	0
MAG1_00154	17115	17207	DNA/hAT#hAT8_Av	24.1	+	0
MAG1_00155	2943	3022	DNA/MULE-MuDR#rnd-5_family-1906	15.6	-	0
MAG1_00155	3035	3294	DNA/MULE-MuDR#rnd-6_family-2684	28.4	-	0
MAG1_00155	9541	9609	PLE/Penelope-Athena#AthJ-N-W1	27.5	+	0
MAG1_00155	23191	23345	DNA/RC#rnd-1_family-717	25.8	-	0
MAG1_00156	6471	6549	LTR/Gypsy#Gypsy-14_DAn-I	8.9	+	0
MAG1_00156	7326	7381	PLE/Penelope-Athena#AthL3	16.4	-	0
MAG1_00156	9790	9843	LINE/R1-LOA#LOA-9_AAe	13.7	+	134
MAG1_00157	10521	10580	DNA/Maverick#Polinton-1_DK	15.5	-	2
MAG1_00157	10541	10578	LTR/Gypsy#Gypsy61-I_AG	10.5	-	2
MAG1_00157	10579	10590	LTR/Gypsy#Gypsy37-I_AG	22	+	2
MAG1_00157	18929	18973	DNA/MULE-MuDR#MULE5_Av	13.3	-	1
MAG1_00157	25511	25599	DNA/hAT#DNA8-105_AP	20.2	-	0
MAG1_00158	3004	6128	DNA/CMC-EnSpm#rnd-5_family-389	5.3	+	1
MAG1_00158	12154	14400	LINE/Soliton#Soliton7_Av	32.281	+	2
MAG1_00158	15810	15852	DNA/MULE-MuDR#MULE3_Av	14.3	-	4
MAG1_00158	25473	25578	DNA/TcMar-Pogo#pogo2_Av	31.4	-	0
MAG1_00158	25630	25896	DNA/MULE-MuDR#rnd-5_family-2421	19.1	-	0
MAG1_00159	1120	1130	DNA/P#P6_Av	20.3	-	11
MAG1_00159	1387	1440	DNA/hAT#hAT15_Av	27.8	-	11
MAG1_00159	25517	25595	DNA/Maverick#Polinton-4_PBa	13.9	-	6
MAG1_00160	4195	4485	DNA/hAT-Tip100#rnd-1_family-700	10.8	+	0
MAG1_00160	4893	5008	DNA/RC#Helitron-N32_CGi	21.6	+	0
MAG1_00160	5684	5742	LTR/Gypsy#Gypsy-11_DVir-I	23.7	-	0
MAG1_00160	17197	17310	DNA/RC#rnd-1_family-717	14.9	-	7
MAG1_00160	19679	19795	DNA/Zator#Zator1_Av	27.6	-	6
MAG1_00160	19821	21921	DNA/Zator#Zator2_Av	22.6	-	19
MAG1_00161	4491	4918	DNA/TcMar-Mariner#Avmar7_Av	26	-	0
MAG1_00161	4971	6898	DNA/hAT#hAT27_Av	23.131	+	4
MAG1_00161	18295	18355	LTR/Pao#BEL-15_DPu-I	15.5	+	8
MAG1_00161	25862	25979	DNA/CMC-EnSpm#CACTA8_Av	6.8	-	1
[truncated: 51,634 more rows]

## Sheet: Rs_AK11
AK11_00001	12486	12546	DNA/hAT-Ac#DNA8-2C_CGi	11.7	-	40
[truncated: 31,216 more rows]
