# Supplementary material for: Evolutionary dynamics of transposable elements in bdelloid rotifers
Source: eLife journal article supplement (doi:10.7554/elife.63194), 2021-02-05
Supplement: supp [file elife-63194-supp-v1.zip › elife_poa_e63194_Figure_7_source_data_1.xlsx]

## Sheet: Sheet1
ID	Species	Group	PAZ-PIWI	Dicer only	Dicer-PAZ	RdRP			PAZ-PIWI	Dicer only	Dicer-PAZ	RdRP
Ar_Ar2018*	Adineta ricciae	Ar	42	7	2	37		Bdelloid average	21.4828	3.86207	1.31034	38.8966
Ar_ARIC003*	Adineta ricciae	Ar	35	7	2	43		Monogonont average	7.5	3.5	2.5	2.5
As_10x_m*	Adineta steineri	As	40	8	2	39		Eukaryote average	5.82353	1.88235	1.29412	0.647059
As_10x_p	Adineta steineri	As	27	5	1	28
As_ASTE804	Adineta steineri	As	20	7	1	32
As_ASTE805	Adineta steineri	As	23	5	1	28
As_ASTE806	Adineta steineri	As	22	4	1	30
Av_Av2013*	Adineta vaga	Av	40	8	2	51
Ba_OHJ22	Brachionus asplanchnoidis	Ba	NA	NA	NA	NA
Ba_OHJ82	Brachionus asplanchnoidis	Ba	NA	NA	NA	NA
Bc_PSC1	Brachionus calyciflorus	Bc	7	5	3	3
Bc_v0.6	Brachionus calyciflorus	Bc	NA	NA	NA	NA
Bp_HYR1	Brachionus plicatilis	Bp	8	2	2	2
Bp_Tokyo1	Brachionus plicatilis	Bp	NA	NA	NA	NA
Br_Italy2	Brachionus rotundiformis	Br	NA	NA	NA	NA
Bt_SM28	Brachionus sp. Tiscar	Bt	NA	NA	NA	NA
Dc_DCAR505	Didymodactylos carnosus	Dc	16	2	1	42
Dc_DCAR706	Didymodactylos carnosus	Dc	18	2	1	46
Rc_Rc2018	Rotaria macrura	Rc	19	4	2	23
Rd_10x_m*	Rotaria sordida	Rd	41	6	1	54
Rd_10x_p	Rotaria sordida	Rd	28	5	1	41
Rd_RSOR408	Rotaria sordida	Rd	24	3	1	42
Rd_RSOR410	Rotaria sordida	Rd	24	3	1	44
Rd_RSOR504	Rotaria sordida	Rd	21	3	1	41
Rg_MAG1	Rotaria magnacalcarata	Rg	14	4	2	48
Rg_MAG2	Rotaria magnacalcarata	Rg	16	5	2	56
Rg_MAG3	Rotaria magnacalcarata	Rg	15	4	1	44
Rg_Rg2018	Rotaria magnacalcarata	Rg	NA	NA	NA	NA
Rg_RM15	Rotaria magnacalcarata	Rg	18	4	2	23
Rg_RM9	Rotaria magnacalcarata	Rg	18	4	2	24
Rp_RPSE411	Rotaria pseudosilwoodensis	Rp	20	3	1	45
Rp_RPSE503	Rotaria pseudosilwoodensis	Rp	20	3	1	45
Rp_RPSE809	Rotaria pseudosilwoodensis	Rp	24	3	1	47
Rp_RPSE812	Rotaria pseudosilwoodensis	Rp	24	3	1	51
Rs_AK11	Rotaria socialis	Rs	18	4	2	23
Rs_AK15	Rotaria socialis	Rs	20	5	2	20
Rs_AK16	Rotaria socialis	Rs	19	5	2	23
Rs_AK27	Rotaria socialis	Rs	27	5	1	22
Rs_RS1	Rotaria socialis	Rs	27	4	2	20
Rw_10x_m*	Rotaria silwoodensis	Rw	43	3	1	63
Rw_10x_p	Rotaria silwoodensis	Rw	24	6	2	45
Rw_RSIL801	Rotaria silwoodensis	Rw	27	3	1	51
Rw_RSIL802	Rotaria silwoodensis	Rw	22	3	1	49
Rw_RSIL804	Rotaria silwoodensis	Rw	23	3	1	63
Rw_RSIL806	Rotaria silwoodensis	Rw	24	2	1	55
GCF_000001215.4	Drosophila melanogaster	Arthropoda	5	2	1	0
Gusev et al. 2014	Polypedilum nubifer	Arthropoda	6	3	2	0
Gusev et al. 2014	Polypedilum vanderplanki	Arthropoda	6	3	2	0
GCF_000002985.6	Caenorhabditis elegans	Nematoda	22	1	1	5
GCA_002082055.1	Hypsibius exemplaris	Tardigrada	8	3	2	1
GCA_001949185.1	Ramazzottius varieornatus	Tardigrada	8	3	2	0
GCF_001194135.1	Octopus bimaculoides	Mollusca	4	3	3	0
GCF_000297895.1	Crassostrea gigas	Mollusca	2	2	1	4
GCF_000327385.1	Lottia gigantea	Mollusca	4	1	1	0
GCF_000002075.1	Aplysia californica	Mollusca	4	1	1	0
GCF_000457365.1	Biomphalaria glabrata	Mollusca	4	1	1	0
GCF_001039355.1	Lingula anatina	Brachiopoda	5	1	1	1
GCF_000326865.1	Helobdella robusta	Annelida	4	1	1	0
GCA_000328365.1	Capitella teleta	Annelida	3	1	1	0
GCF_000699445.1	Schistosoma haematobium	Platyhelminthes	2	1	1	0
GCA_001642005.1	Intoshia linei	Orthonectida	3	1	1	0
GCA_012934845.1	Pomphorhynchus laevis	Acanthocephala	9	4	0	0
HMMER match (E-value ≤ 1e–5) versus PF02170 (PAZ domain) and PF02171 (PIWI domain) HMM alignments
*Diploid assembly (not used in average calculation)
