# Supplementary material for: Evolutionary dynamics of transposable elements in bdelloid rotifers
Source: eLife journal article supplement (doi:10.7554/elife.63194), 2021-02-05
Supplement: supp [file elife-63194-supp-v1.zip › elife_poa_e63194_Figure_8_source_data_1.docx]

**Figure 8—source data 1.** CAFE model fitting birth rate model to gene family evolution of RNAi pathways.

|  |  | Log likelihood | *P* shift in birth rate | Average birth rate |
| --- | --- | --- | --- | --- |
| Combined model | Argo | -240.21 | <0.0001 | 0.0018 |
|  | Dicer | -57.06 | 0.999 | 0.0018 |
|  | RdRP | -390.25 | <0.0001 | 0.0018 |
|  |  |  |  |  |
| Separate models | Argo | -239.8 | <0.0001 | 0.0018 |
|  | Dicer | -52.66 | 0.999 | 0.00078 |
|  | RdRP | -390.18 | <0.0001 | 0.0019 |
