# Supplementary material for: Evolutionary dynamics of transposable elements in bdelloid rotifers
Source: eLife journal article supplement (doi:10.7554/elife.63194), 2021-02-05
Supplement: supp [file elife-63194-supp-v1.zip › elife_poa_e63194_Table_1_source_data_1.xlsx]

## Sheet: Sheet1
Sample ID	Species name	Species abbreviation	Sample location	Latitude	Longitude	Habitat	Collection date	Sample notes	Lab clone ID	DNA extraction	Library description	Library type	Sequencing platform	Read length	Insert size	Reads (raw)	Reads (filtered)	%	Bases (filtered)	%	NCBI taxid	Study accession	Sample accession	Run accession(s)	GenBank accession (reference)	Locus tag (reference)	GenBank accession (maxhap)	Locus tag (maxhap)
Ar_ARIC003	Adineta ricciae Segers & Shiel, 2005	Ar	Ryan's Billabong, Victoria, Australia	-36.1089	146.977	Dry mud	1998_06_26	DNA extracted on 2014_01_10 from approximately 200 individuals descended clonally from a single founder that was itself isolated on 2013_12_05 after ~15 years of clonal growth in various laboratories.	AD001	Chelex (Bio-Rad InstaGene Matrix) Protocol (modified), then Whole Genome Amplification (WGA) via REPLI-g Single Cell Kit (Qiagen)	WGA (multiple clonal individuals, whole-genome amplification)	TruSeq DNA Nano	Illumina HiSeq X 150PE	150	350 bp	90546234	80883448	0.893283	12116268708	0.892087	249248	PRJEB39843	ERS4950511	ERR4467412	GCA_904047305	PZO41		TLM85
As_10x	Adineta steineri Bartos, 1951	As	Silwood Park, Ascot, UK	51.4081	-0.645139	Wind deposit in oak woodland. Ground height trap (10cm) near Tree 1235.	2015_04_29	DNA extracted on 2018_11_19 from approximately 12000 individuals. A single individual was isolated from nature on 2015_10_15, followed by 3 years of clonal growth, with bottlenecking every ca. 4 months via subculture, and maximum population size of ca. 10^3 in between.	AD009	Chromium Demonstrated Protocol: HMW gDNA Extraction from Single Insects (modified)	WGS (multiple clonal individuals, 10x Genomics library prep)	10X Genomics	Illumina HiSeq X 150PE	150	300 bp	624118556	244568726	0.391863	33872768551	0.36182	433720	PRJEB39843	ERS4950728	ERR4468314		JVF98		KVK53
As_ASTE804	Adineta steineri Bartos, 1951	As	Silwood Park, Ascot, UK	51.4081	-0.645139	Moss (Hypnum cupressiforme) on oak (Quercus robur). Tree 1236, 10cm, NE.	2015_05_11	DNA extracted on 2015_05_18 from a single individual isolated from a moss sample to a DNA extraction tube via needle.		Chelex (Bio-Rad InstaGene Matrix) Protocol (modified), then Whole Genome Amplification (WGA) via REPLI-g Single Cell Kit (Qiagen)	WGA (single individual, whole-genome amplification)	TruSeq DNA Nano	Illumina HiSeq X 150PE	150	350 bp	91447394	66193182	0.723839	9912822912	0.722661	433720	PRJEB39843	ERS4950518	ERR4467304	GCA_904047245	SYB60		PDB44
As_ASTE805	Adineta steineri Bartos, 1951	As	Silwood Park, Ascot, UK	51.4081	-0.645139	Moss (Hypnum cupressiforme) on oak (Quercus robur). Tree 1236, 25cm, NE.	2015_05_11	DNA extracted on 2015_05_18 from a single individual isolated from a moss sample to a DNA extraction tube via needle.		Chelex (Bio-Rad InstaGene Matrix) Protocol (modified), then Whole Genome Amplification (WGA) via REPLI-g Single Cell Kit (Qiagen)	WGA (single individual, whole-genome amplification)	TruSeq DNA Nano	Illumina HiSeq X 150PE	150	350 bp	87974498	67834632	0.771072	10160497392	0.769958	433720	PRJEB39843	ERS4950520	ERR4467230	GCA_904047255	ZFZ87		QVD38
As_ASTE806	Adineta steineri Bartos, 1951	As	Silwood Park, Ascot, UK	51.4081	-0.645139	Moss (Hypnum cupressiforme) on oak (Quercus robur). Tree 1236, 120cm NW.	2015_05_11	DNA extracted on 2015_05_18 from a single individual isolated from a moss sample to a DNA extraction tube via needle.		Chelex (Bio-Rad InstaGene Matrix) Protocol (modified), then Whole Genome Amplification (WGA) via REPLI-g Single Cell Kit (Qiagen)	WGA (single individual, whole-genome amplification)	TruSeq DNA Nano	Illumina HiSeq X 150PE	150	350 bp	98375830	87463100	0.889071	13100083924	0.887758	433720	PRJEB39843	ERS4950519	ERR4467307	GCA_904047275	QTP73		QOL84
Bc_PSC1	Brachionus calyciflorus Pallas, 1776	Bc	Fish tank in Plön, Germany				2013			Phenol-chloroform extraction	WGS (multiple clonal individuals)		Illumina NextSeq500	150	350 bp	876886528	791205226	0.902289	111299527227	0.846172	104777	PRJEB39843	SAMN15803692	SRR12443467,SRR12443466,SRR12439285,SRR12439284	GCA_904009505	PXS80		JSL87
Dc_DCAR505	Didymodactylos carnosus Milne, 1916	Dc	Silwood Park, Ascot, UK	51.4081	-0.645139	Moss (Hypnum cupressiforme) on oak (Quercus robur). Tree 1236, 25cm N.	2019_01_24	DNA extracted on 2019_02_05 from a single individual washed and isolated from a moss sample on 2019_01_25		QIAamp DNA Micro Kit, then Whole Genome Amplification (WGA) via REPLI-g Single Cell Kit (Qiagen)	WGA (single individual, whole-genome amplification)	TruSeq DNA Nano	Illumina HiSeq X 150PE	150	350 bp	77230960	45616728	0.590653	6829254964	0.589509	1234261	PRJEB39843	ERS4950523	ERR4467385	GCA_904047325	SEI62		PIE72
Dc_DCAR706	Didymodactylos carnosus Milne, 1916	Dc	Silwood Park, Ascot, UK	51.4081	-0.645139	Moss (Hypnum cupressiforme) on oak (Quercus robur). Tree 1236, 25cm N.	2019_01_24	DNA extracted on 2019_02_05 from a single individual washed and isolated from a moss sample on 2019_01_25		QIAamp DNA Micro Kit, then Whole Genome Amplification (WGA) via REPLI-g Single Cell Kit (Qiagen)	WGA (single individual, whole-genome amplification)	TruSeq DNA Nano	Illumina HiSeq X 150PE	150	350 bp	189048254	185492312	0.98119	27883186784	0.983283	1234261	PRJEB39843	ERS4950524	ERR4467442	GCA_904053135	XQC63		MLE82
Rd_10x	Rotaria sordida Western, 1893	Rd	Field pond, Silwood Park, UK	51.4125	-0.642222	Wet mud and silt from temporary pond, South edge, 1m from waterline.	2017_09_28	DNA extracted on 2018_12_03 from approximately 500 individuals reared from a single individual collected from nature, after ca. 5 clonal laboratory generations.		Chromium Demonstrated Protocol: HMW gDNA Extraction from Single Insects (modified)	WGS (multiple clonal individuals, 10x Genomics library prep)	10X Genomics	Illumina HiSeq X 150PE	150	300 bp	612876150	178853646	0.291827	24771229971	0.269453	392033	PRJEB39843	ERS4950727	ERR4468316		WFQ94		YGF54
Rd_RSOR408	Rotaria sordida Western, 1893	Rd	Field pond, Silwood Park, UK	51.4125	-0.642222	Wet mud and silt from temporary pond, South edge, 1m from waterline.	2019_02_04	DNA extracted on 2019_02_14 from a single animal, which was the first offspring produced by an individual isolated from a mud sample on 2019_02_05.		QIAamp DNA Micro Kit, then Whole Genome Amplification (WGA) via REPLI-g Single Cell Kit (Qiagen)	WGA (single individual, whole-genome amplification)	TruSeq DNA Nano	Illumina HiSeq X 150PE	150	350 bp	76463738	66687360	0.872144	9987168740	0.870754	392033	PRJEB39843	ERS4950566	ERR4467411	GCA_904053145	MEY31		YVN76
Rd_RSOR410	Rotaria sordida Western, 1893	Rd	Field pond, Silwood Park, UK	51.4125	-0.642222	Wet mud and silt from temporary pond, North edge, 1m from waterline.	2019_02_04	DNA extracted on 2019_02_14 from a single animal, which was the first offspring produced by an individual isolated from a mud sample on 2019_02_05.		QIAamp DNA Micro Kit, then Whole Genome Amplification (WGA) via REPLI-g Single Cell Kit (Qiagen)	WGA (single individual, whole-genome amplification)	TruSeq DNA Nano	Illumina HiSeq X 150PE	150	350 bp	87507942	70495958	0.805595	10556843516	0.804258	392033	PRJEB39843	ERS4950567	ERR4467413	GCA_904053495	KAN70		YYT82
Rd_RSOR504	Rotaria sordida Western, 1893	Rd	Field pond, Silwood Park, UK	51.4125	-0.642222	Wet mud and silt from temporary pond, East edge, 1m from waterline	2019_01_24	DNA extracted on 2019_02_05 from a single animal, which was the first offspring produced by an individual isolated from the mud sample on 2019_01_25.		QIAamp DNA Micro Kit, then Whole Genome Amplification (WGA) via REPLI-g Single Cell Kit (Qiagen)	WGA (single individual, whole-genome amplification)	TruSeq DNA Nano	Illumina HiSeq X 150PE	150	350 bp	84525272	66113600	0.782176	9900789234	0.780894	392033	PRJEB39843	ERS4950568	ERR4467414	GCA_904047315	RHR55		KWV36
Rg_MAG1	Rotaria magnacalcarata Parsons, 1892	Rg	Japanese pond, Silwood Park, UK	51.4074	-0.640526	Epibiont on Asellus sp.	2015_05_01			Chelex (Bio-Rad InstaGene Matrix) Protocol (modified), then Whole Genome Amplification (WGA) via REPLI-g Single Cell Kit (Qiagen)	WGA (single individual, whole-genome amplification)	TruSeq DNA Nano	Illumina NextSeq500 150 PE	150	550 bp	102870142	68919258	0.669964	10316156338	0.668555	392030	PRJEB39843	ERS4944744	ERR2983754,ERR2983755,ERR2983756,ERR2983757,ERR2983766,ERR2983767,ERR2983768,ERR2983769	GCA_903995865	YZD51		KZE45
Rg_MAG2	Rotaria magnacalcarata Parsons, 1892	Rg	Japanese pond, Silwood Park, UK	51.4074	-0.640526	Epibiont on Asellus sp.	2015_05_01			Chelex (Bio-Rad InstaGene Matrix) Protocol (modified), then Whole Genome Amplification (WGA) via REPLI-g Single Cell Kit (Qiagen)	WGA (single individual, whole-genome amplification)	TruSeq DNA Nano	Illumina NextSeq500 150 PE	150	550 bp	111765904	76415078	0.683707	11440293080	0.682396	392030	PRJEB39843	ERS4944745	ERR2983780,ERR2983781,ERR2983782,ERR2983783,ERR2983784,ERR2983785,ERR2983786,ERR2983787	GCA_903995855	KOU43		KLX24
Rg_MAG3	Rotaria magnacalcarata Parsons, 1892	Rg	Japanese pond, Silwood Park, UK	51.4074	-0.640526	Epibiont on Asellus sp.	2015_05_01			Chelex (Bio-Rad InstaGene Matrix) Protocol (modified), then Whole Genome Amplification (WGA) via REPLI-g Single Cell Kit (Qiagen)	WGA (single individual, whole-genome amplification)	TruSeq DNA Nano	Illumina NextSeq500 150 PE	150	550 bp	106495114	72475834	0.680555	10850367681	0.67924	392030	PRJEB39843	ERS4944746	ERR2983788,ERR2983789,ERR2983790,ERR2983791,ERR2983813,ERR2983814,ERR2983815,ERR2983816	GCA_903995845	TMI47		ZDN38
Rg_RM15	Rotaria magnacalcarata Parsons, 1892	Rg	Freshwater spring, Fontaneto d'Agogna, Italy	45.6409	8.48619	Epibiont on Asellus sp.	2016_04_20	DNA extracted from a single animal	A978_RM15	Chelex (Bio-Rad InstaGene Matrix) Protocol (modified), then Whole Genome Amplification (WGA) via REPLI-g Single Cell Kit (Qiagen)	WGA (single individual, whole-genome amplification)	TruSeq DNA Nano	Illumina NextSeq500 150 PE	150	550 bp	103666224	63862192	0.616037	9559773492	0.614779	392030	PRJEB39843	ERS4944748	ERR2983859,ERR2983860,ERR2983861,ERR2983862,ERR2983863,ERR2983864,ERR2983865,ERR2983866	GCA_903995885	PVB93		VAC29
Rg_RM9	Rotaria magnacalcarata Parsons, 1892	Rg	Freshwater spring, Fontaneto d'Agogna, Italy	45.6409	8.48619	Epibiont on Asellus sp.	2016_04_20	DNA extracted from a single animal	A978_RM9	Chelex (Bio-Rad InstaGene Matrix) Protocol (modified), then Whole Genome Amplification (WGA) via REPLI-g Single Cell Kit (Qiagen)	WGA (single individual, whole-genome amplification)	TruSeq DNA Nano	Illumina NextSeq500 150 PE	150	550 bp	106488692	58987854	0.553935	8829392530	0.552759	392030	PRJEB39843	ERS4944747	ERR2983821,ERR2983822,ERR2983823,ERR2983824,ERR2983833,ERR2983834,ERR2983835,ERR2983836	GCA_903995825	IZA79		QRF87
Rp_RPSE411	Rotaria 'Silwood 2'	Rp	Field pond, Silwood Park, UK	51.4125	-0.642222	Wet mud and silt from temporary pond, East edge, 1m from waterline	2019_01_24	DNA extracted on 2019_02_14 from a single animal, which was the second offspring produced by an individual isolated from the mud sample on 2019_01_25. Sister to RPSE503.	E19A6	QIAamp DNA Micro Kit, then Whole Genome Amplification (WGA) via REPLI-g Single Cell Kit (Qiagen)	WGA (single individual, whole-genome amplification)	TruSeq DNA Nano	Illumina HiSeq X 150PE	150	350 bp	90429804	68865428	0.761535	10312585848	0.760265	2762512	PRJEB39843	ERS4950714	ERR4467434	GCA_904053095	PYY57		OTJ50
Rp_RPSE503	Rotaria 'Silwood 2'	Rp	Field pond, Silwood Park, UK	51.4125	-0.642222	Wet mud and silt from temporary pond, East edge, 1m from waterline	2019_01_24	DNA extracted on 2019_02_05 from a single animal, which was the first offspring produced by an individual isolated from the mud sample on 2019_01_25. Sister to RPSE411.	E19A6	QIAamp DNA Micro Kit, then Whole Genome Amplification (WGA) via REPLI-g Single Cell Kit (Qiagen)	WGA (single individual, whole-genome amplification)	TruSeq DNA Nano	Illumina HiSeq X 150PE	150	350 bp	78755626	65069966	0.826226	9745127944	0.824925	2762512	PRJEB39843	ERS4950715	ERR4467438	GCA_904053125	KJQ49		NTT36
Rp_RPSE809	Rotaria 'Silwood 2'	Rp	Field pond, Silwood Park, UK	51.4125	-0.642222	Wet mud and silt from temporary pond, East edge, 1m from waterline	2018_08_02	DNA extracted from a single starved individual, isolated on 2019_01_28 after 3 generations of clonal lab growth from a single original founder. Different original sample to SE18Y.	E18Z	QIAamp DNA Micro Kit, then Whole Genome Amplification (WGA) via REPLI-g Single Cell Kit (Qiagen)	WGA (single individual, whole-genome amplification)	TruSeq DNA Nano	Illumina HiSeq X 150PE	150	350 bp	76943028	48066418	0.624701	7198277172	0.623689	2762512	PRJEB39843	ERS4950716	ERR4467410	GCA_904053085	OKD39		WKI40
Rp_RPSE812	Rotaria 'Silwood 2'	Rp	Field pond, Silwood Park, UK	51.4125	-0.642222	Wet mud and silt from temporary pond, Southeast edge, 1m from waterline	2018_08_02	DNA extracted from a single starved individual, isolated on 2019_01_28 after 3 generations of clonal lab growth from a single original founder. Different original sample to E18Z	SE18Y	QIAamp DNA Micro Kit, then Whole Genome Amplification (WGA) via REPLI-g Single Cell Kit (Qiagen)	WGA (single individual, whole-genome amplification)	TruSeq DNA Nano	Illumina HiSeq X 150PE	150	350 bp	81408292	47901736	0.588413	7172405988	0.587361	2762512	PRJEB39843	ERS4950717	ERR4467439	GCA_904053105	XUW21		MKF92
Rs_AK11	Rotaria socialis Kellicott, 1888	Rs	Japanese pond, Silwood Park, UK	51.4074	-0.640526	Epibiont on Asellus sp.	2016_04_14	DNA extracted from a single animal isolated from the same Asellus host animal as AK15.		Chelex (Bio-Rad InstaGene Matrix) Protocol (modified), then Whole Genome Amplification (WGA) via REPLI-g Single Cell Kit (Qiagen)	WGA (single individual, whole-genome amplification)	TruSeq DNA Nano	Illumina NextSeq500 150 PE	150	550 bp	54673776	38559640	0.705268	5773152265	0.703951	392032	PRJEB39843	ERS2957775	ERR2983882,ERR2983883,ERR2983884,ERR2983885	GCA_903995835	PDI91		YBO30
Rs_AK15	Rotaria socialis Kellicott, 1888	Rs	Japanese pond, Silwood Park, UK	51.4074	-0.640526	Epibiont on Asellus sp.	2016_04_14	DNA extracted from a single animal isolated from the same Asellus host animal as AK11.		Chelex (Bio-Rad InstaGene Matrix) Protocol (modified), then Whole Genome Amplification (WGA) via REPLI-g Single Cell Kit (Qiagen)	WGA (single individual, whole-genome amplification)	TruSeq DNA Nano	Illumina NextSeq500 150 PE	150	550 bp	55197398	36914776	0.668777	5525206504	0.667327	392032	PRJEB39843	ERS2957798	ERR2983908,ERR2983909,ERR2983910,ERR2983911	GCA_903995795	YXF18		IFU92
Rs_AK16	Rotaria socialis Kellicott, 1888	Rs	Freshwater stream, Chobham, UK			Epibiont on Asellus sp.	2016_04_18	DNA extracted from a single animal		Chelex (Bio-Rad InstaGene Matrix) Protocol (modified), then Whole Genome Amplification (WGA) via REPLI-g Single Cell Kit (Qiagen)	WGA (single individual, whole-genome amplification)	TruSeq DNA Nano	Illumina NextSeq500 150 PE	150	550 bp	61120294	42317794	0.692369	6336253558	0.691124	392032	PRJEB39843	ERS2957799	ERR2983912,ERR2983913,ERR2983914,ERR2983915	GCA_903995805	TEX38		XAY58
Rs_AK27	Rotaria socialis Kellicott, 1888	Rs	Lily pond, Silwood Park, UK	51.4084	-0.640656	Epibiont on Asellus sp.	2016_04_21	DNA extracted from a single animal		Chelex (Bio-Rad InstaGene Matrix) Protocol (modified), then Whole Genome Amplification (WGA) via REPLI-g Single Cell Kit (Qiagen)	WGA (single individual, whole-genome amplification)	TruSeq DNA Nano	Illumina NextSeq500 150 PE	150	550 bp	57401348	36136526	0.629541	5410602049	0.628394	392032	PRJEB39843	ERS2957800	ERR2983916,ERR2983917,ERR2983918,ERR2983919	GCA_903995815	UXX43		ZHJ82
Rs_RS1	Rotaria socialis Kellicott, 1888	Rs	Freshwater spring, Fontaneto d'Agogna, Italy	45.6409	8.48619	Epibiont on Asellus sp.	2016_04_20	DNA extracted from a single animal	A978_RS1	Chelex (Bio-Rad InstaGene Matrix) Protocol (modified), then Whole Genome Amplification (WGA) via REPLI-g Single Cell Kit (Qiagen)	WGA (single individual, whole-genome amplification)	TruSeq DNA Nano	Illumina NextSeq500 150 PE	150	550 bp	66501710	40378004	0.607172	6045873382	0.606087	392032	PRJEB39843	ERS2957801	ERR2983920,ERR2983921,ERR2983922,ERR2983923	GCA_903995875	YOI87		QXY62
Rs_RSOC-MP	Rotaria socialis Kellicott, 1888	Rs	Japanese pond, Silwood Park, UK	51.4074	-0.640526	Epibiont on Asellus sp.	2016_04_18			Chelex (Bio-Rad InstaGene Matrix) Protocol (modified), then Whole Genome Amplification (WGA) via REPLI-g Single Cell Kit (Qiagen)	WGA (single individual, whole-genome amplification)	TruSeq DNA Nano	Illumina HiSeq 4000	150	3000 bp	246779748	120198790	0.487069	15642401695	0.422574	392032	PRJEB39843	ERS2958081	ERR2984250,ERR2984251,ERR2984252	na	na		na
Rw_10x	Rotaria 'Silwood 1'	Rw	Field pond, Silwood Park, UK	51.4125	-0.642222	Wet mud and silt from temporary pond, North edge, 1m from waterline	2017_09_28	DNA extracted on 2018_11_19 from approximately 7000 individuals reared from a single individual collected from nature, after ca.15 clonal laboratory generations	N17X	Chromium Demonstrated Protocol: HMW gDNA Extraction from Single Insects (modified)	WGS (multiple clonal individuals, 10x Genomics library prep)	10X Genomics	Illumina HiSeq X 150PE	150	300 bp	624118556	117918196	0.188936	16331670146	0.174451	2762511	PRJEB39843	ERS4950729	ERR4468315		KIW28		ULP45
Rw_RSIL801	Rotaria 'Silwood 1'	Rw	Field pond, Silwood Park, UK	51.4125	-0.642222	Wet mud and silt from temporary pond, North edge, 1m from waterline	2017_09_28	DNA extracted from a single starved individual, isolated on 2019_01_28 from the same dish and clonal line (N17X) as RSIL802.	N17X	QIAamp DNA Micro Kit, then Whole Genome Amplification (WGA) via REPLI-g Single Cell Kit (Qiagen)	WGA (single individual, whole-genome amplification)	TruSeq DNA Nano	Illumina HiSeq X 150PE	150	350 bp	92850226	79792134	0.859364	11950581638	0.858054	2762511	PRJEB39843	ERS4950721	ERR4467437	GCA_904053155	ZIA44		PIU77
Rw_RSIL802	Rotaria 'Silwood 1'	Rw	Field pond, Silwood Park, UK	51.4125	-0.642222	Wet mud and silt from temporary pond, North edge, 1m from waterline	2017_09_28	DNA extracted from a single starved individual, isolated on 2019_01_28 from the same dish and clonal line (N17X) as RSIL801	N17X	QIAamp DNA Micro Kit, then Whole Genome Amplification (WGA) via REPLI-g Single Cell Kit (Qiagen)	WGA (single individual, whole-genome amplification)	TruSeq DNA Nano	Illumina HiSeq X 150PE	150	350 bp	81205940	70734092	0.871046	10593691300	0.869698	2762511	PRJEB39843	ERS4950722	ERR4467440	GCA_904053505	OWU23		NNH38
Rw_RSIL804	Rotaria 'Silwood 1'	Rw	Field pond, Silwood Park, UK	51.4125	-0.642222	Wet mud and silt from temporary pond, Northeast edge, 1m from waterline	2017_09_28	DNA extracted from a single starved individual, isolated on 2019_01_28 from a clonal line reared in laboratory for 15-20 generations. Originally isolated from a different sample in a different part of the pond to N17X.	NE17Y	QIAamp DNA Micro Kit, then Whole Genome Amplification (WGA) via REPLI-g Single Cell Kit (Qiagen)	WGA (single individual, whole-genome amplification)	TruSeq DNA Nano	Illumina HiSeq X 150PE	150	350 bp	78295752	56926380	0.727069	8522841598	0.725696	2762511	PRJEB39843	ERS4950723	ERR4467436	GCA_904053115	SDT29		QGW23
Rw_RSIL806	Rotaria 'Silwood 1'	Rw	Field pond, Silwood Park, UK	51.4125	-0.642222	Wet mud and silt from temporary pond, Northeast edge, 1m from waterline	2018_08_02	DNA extracted from a single starved individual, isolated on 2019_01_28 from a clonal line reared in laboratory for 5 generations. Isolated from the pond at a different timepoint to NE17Y, but within 1m of the same location.	NE18Q	QIAamp DNA Micro Kit, then Whole Genome Amplification (WGA) via REPLI-g Single Cell Kit (Qiagen)	WGA (single individual, whole-genome amplification)	TruSeq DNA Nano	Illumina HiSeq X 150PE	150	350 bp	72383298	60545852	0.836462	9068102004	0.835193	2762511	PRJEB39843	ERS4950724	ERR4467435	GCA_904054495	QVM66		UEN25
