# Supplementary material for: Evolutionary dynamics of transposable elements in bdelloid rotifers
Source: eLife journal article supplement (doi:10.7554/elife.63194), 2021-02-05
Supplement: supp [file elife-63194-supp-v1.zip › elife_poa_e63194_Table_2_source_data_2.xlsx]

## Sheet: Sheet1
ID	SZ	NN	N50	L50	AU	GC	Gaps (kb)	Genome BUSCO	CDS	Proteome BUSCO	GenBank accession
Ar_ARIC003	172.2	22742	18.6	2729	23.2	35.6	2	C:91%,[S:27%,D:64%],F:5%	64538	C:95%[S:14%,D:81%],F:3%	GCA_904047305.1
As_10x_m	231.1	8705	199.2	285	289.3	28.8	290	C:95%,[S:24%,D:71%],F:2%	67518	C:97%[S:19%,D:78%],F:2%	GCA_904059895.1
As_ASTE804	163.7	34092	20.8	2068	29.7	29.1	6	C:97%,[S:78%,D:19%],F:1%	54870	C:99%[S:73%,D:26%],F:1%	GCA_904047245.1
As_ASTE805	166.6	39093	22.4	1837	33.6	29.3	36	C:98%,[S:81%,D:17%],F:0%	55382	C:99%[S:74%,D:25%],F:1%	GCA_904047255.1
As_ASTE806	163.8	32429	22.7	1846	32.9	29.1	18	C:96%,[S:77%,D:19%],F:2%	54295	C:97%[S:70%,D:27%],F:2%	GCA_904047275.1
Dc_DCAR505	344.1	121494	7197	13019	9909	33.6	70	C:86%[S:69%,D:17%],F:8%	50399	C:89%[S:70%,D:18%],F:9%	GCA_904047325.1
Dc_DCAR706	401.6	165346	10523	9156	17581	33.7	98	C:95%[S:70%,D:25%],F:2%	51520	C:95%[S:71%,D:25%],F:2%	GCA_904053135.1
Rd_10x_m	360.6	18468	71.9	1262	107.6	30	388	C:93%,[S:23%,D:70%],F:1%	61901	C:96%[S:21%,D:75%],F:1%	GCA_904059885.1
Rd_RSOR408	273.4	73081	17.8	3788	28	30.6	16	C:93%,[S:76%,D:18%],F:3%	44351	C:96%[S:74%,D:22%],F:3%	GCA_904053145.1
Rd_RSOR410	272.4	69564	21.2	3120	33.8	30.5	10	C:95%,[S:81%,D:15%],F:2%	43594	C:97%[S:76%,D:21%],F:2%	GCA_904053495.1
Rd_RSOR504	264.2	69184	15.6	4305	23.6	30.5	16	C:93%,[S:81%,D:12%],F:4%	44209	C:95%[S:77%,D:19%],F:4%	GCA_904047315.1
Rg_MAG1	241	293619	2.8	17705	5.6	31.9	1785	C:82%,[S:74%,D:8%],F:14%	79415	C:89%[S:78%,D:11%],F:11%	GCA_903995865.1
Rg_MAG2	262	386620	1.8	28222	4.3	31.9	1823	C:76%,[S:71%,D:5%],F:19%	88549	C:84%[S:74%,D:10%],F:16%	GCA_903995855.1
Rg_MAG3	258.7	374008	1.9	26450	4.6	31.9	1822	C:78%,[S:68%,D:10%],F:18%	86934	C:85%[S:69%,D:16%],F:14%	GCA_903995845.1
Rg_RM9	176.6	38569	16.8	2801	23.2	31.9	223	C:94%,[S:79%,D:15%],F:3%	39153	C:96%[S:77%,D:20%],F:2%	GCA_903995825.1
Rg_RM15	198.5	126446	10.4	4693	15.7	32	766	C:93%,[S:79%,D:14%],F:5%	51592	C:97%[S:79%,D:18%],F:3%	GCA_903995885.1
Rp_RPSE411	308.8	61655	18.2	4528	25.6	31.1	8	C:92%,[S:75%,D:17%],F:4%	52815	C:93%[S:72%,D:21%],F:6%	GCA_904053095.1
Rp_RPSE503	296.4	68725	13	6328	17.4	31.4	12	C:90%,[S:75%,D:15%],F:7%	53244	C:91%[S:70%,D:21%],F:8%	GCA_904053125.1
Rp_RPSE809	295.1	107316	12	6719	16.3	31.2	29	C:89%,[S:76%,D:13%],F:6%	57469	C:92%[S:75%,D:18%],F:6%	GCA_904053085.1
Rp_RPSE812	274.1	65539	11	6936	14.7	31.2	9	C:87%,[S:74%,D:13%],F:9%	52347	C:89%[S:74%,D:16%],F:9%	GCA_904053105.1
Rs_AK11	175	115181	11.6	3687	17.7	31.8	968	C:91%,[S:80%,D:11%],F:5%	50678	C:94%[S:76%,D:18%],F:5%	GCA_903995835.1
Rs_AK15	151.3	21443	34.3	1245	44.7	31.8	77	C:96%,[S:79%,D:18%],F:1%	34893	C:98%[S:77%,D:21%],F:1%	GCA_903995795.1
Rs_AK16	151.3	18665	40.3	1049	53.4	31.9	78	C:96%,[S:79%,D:17%],F:3%	34390	C:98%[S:78%,D:20%],F:2%	GCA_903995805.1
Rs_AK27	174.5	109049	13	3377	19.1	31.8	837	C:91%,[S:78%,D:14%],F:5%	49012	C:95%[S:78%,D:17%],F:5%	GCA_903995815.1
Rs_RS1	154.6	20987	35	1224	46.2	31.8	96	C:97%,[S:80%,D:17%],F:0%	34499	C:99%[S:79%,D:20%],F:1%	GCA_903995875.1
Rw_10x_m	475.8	18466	298.9	220	142	30.5	674	C:94%,[S:16%,D:79%],F:1%	70338	C:97%[S:9%,D:89%],F:1%	GCA_904059905.1
Rw_RSIL801	278.1	73499	14.3	5005	21.3	30.8	6	C:90%,[S:79%,D:11%],F:6%	47030	C:93%[S:75%,D:19%],F:5%	GCA_904053155.1
Rw_RSIL802	265.8	69095	14.2	4767	21.2	30.7	7	C:87%,[S:75%,D:12%],F:9%	46049	C:90%[S:73%,D:17%],F:8%	GCA_904053505.1
Rw_RSIL804	275.7	146178	8.9	7948	13	31.1	33	C:87%,[S:75%,D:12%],F:8%	51958	C:90%[S:71%,D:19%],F:8%	GCA_904053115.1
Rw_RSIL806	301.9	87188	17.9	4046	29.4	30.9	14	C:94%,[S:79%,D:15%],F:4%	48353	C:96%[S:76%,D:20%],F:3%	GCA_904054495.1
