# Supplementary material for: Evolutionary dynamics of transposable elements in bdelloid rotifers
Source: eLife. 2021 Feb 5;10:e63194. doi: 10.7554/eLife.63194 (PMC7943196; doi:10.7554/eLife.63194)
Supplement: Table 1—source data 1. [file elife-63194-table1-data1.xlsx]

## Sheet: Collection info
Sample ID	Species name	Species abbreviation	Sample location	Latitude	Longitude	Habitat	Collection date	Sample notes	Lab clone ID
Ar_ARIC003	Adineta ricciae Segers & Shiel, 2005	Ar	Ryan's Billabong, Victoria, Australia	-36.1089	146.977	Dry mud	1998_06_26	DNA extracted on 2014_01_10 from approximately 200 individuals descended clonally from a single founder that was itself isolated on 2013_12_05 after ~15 years of clonal growth in various laboratories.	AD001
As_10x	Adineta steineri Bartos, 1951	As	Silwood Park, Ascot, UK	51.4081	-0.645139	Wind deposit in oak woodland. Ground height trap (10cm) near Tree 1235.	2015_04_29	DNA extracted on 2018_11_19 from approximately 12000 individuals. A single individual was isolated from nature on 2015_10_15, followed by 3 years of clonal growth, with bottlenecking every ca. 4 months via subculture, and maximum population size of ca. 10^3 in between.	AD009
As_ASTE804	Adineta steineri Bartos, 1951	As	Silwood Park, Ascot, UK	51.4081	-0.645139	Moss (Hypnum cupressiforme) on oak (Quercus robur). Tree 1236, 10cm, NE.	2015_05_11	DNA extracted on 2015_05_18 from a single individual isolated from a moss sample to a DNA extraction tube via needle.
As_ASTE805	Adineta steineri Bartos, 1951	As	Silwood Park, Ascot, UK	51.4081	-0.645139	Moss (Hypnum cupressiforme) on oak (Quercus robur). Tree 1236, 25cm, NE.	2015_05_11	DNA extracted on 2015_05_18 from a single individual isolated from a moss sample to a DNA extraction tube via needle.
As_ASTE806	Adineta steineri Bartos, 1951	As	Silwood Park, Ascot, UK	51.4081	-0.645139	Moss (Hypnum cupressiforme) on oak (Quercus robur). Tree 1236, 120cm NW.	2015_05_11	DNA extracted on 2015_05_18 from a single individual isolated from a moss sample to a DNA extraction tube via needle.
Bc_PSC1	Brachionus calyciflorus Pallas, 1776	Bc	Fish tank in Plön, Germany				2013
Dc_DCAR505	Didymodactylos carnosus Milne, 1916	Dc	Silwood Park, Ascot, UK	51.4081	-0.645139	Moss (Hypnum cupressiforme) on oak (Quercus robur). Tree 1236, 25cm N.	2019_01_24	DNA extracted on 2019_02_05 from a single individual washed and isolated from a moss sample on 2019_01_25
Dc_DCAR706	Didymodactylos carnosus Milne, 1916	Dc	Silwood Park, Ascot, UK	51.4081	-0.645139	Moss (Hypnum cupressiforme) on oak (Quercus robur). Tree 1236, 25cm N.	2019_01_24	DNA extracted on 2019_02_05 from a single individual washed and isolated from a moss sample on 2019_01_25
Rd_10x	Rotaria sordida Western, 1893	Rd	Field pond, Silwood Park, UK	51.4125	-0.642222	Wet mud and silt from temporary pond, South edge, 1m from waterline.	2017_09_28	DNA extracted on 2018_12_03 from approximately 500 individuals reared from a single individual collected from nature, after ca. 5 clonal laboratory generations.
Rd_RSOR408	Rotaria sordida Western, 1893	Rd	Field pond, Silwood Park, UK	51.4125	-0.642222	Wet mud and silt from temporary pond, South edge, 1m from waterline.	2019_02_04	DNA extracted on 2019_02_14 from a single animal, which was the first offspring produced by an individual isolated from a mud sample on 2019_02_05.
Rd_RSOR410	Rotaria sordida Western, 1893	Rd	Field pond, Silwood Park, UK	51.4125	-0.642222	Wet mud and silt from temporary pond, North edge, 1m from waterline.	2019_02_04	DNA extracted on 2019_02_14 from a single animal, which was the first offspring produced by an individual isolated from a mud sample on 2019_02_05.
Rd_RSOR504	Rotaria sordida Western, 1893	Rd	Field pond, Silwood Park, UK	51.4125	-0.642222	Wet mud and silt from temporary pond, East edge, 1m from waterline	2019_01_24	DNA extracted on 2019_02_05 from a single animal, which was the first offspring produced by an individual isolated from the mud sample on 2019_01_25.
Rg_MAG1	Rotaria magnacalcarata Parsons, 1892	Rg	Japanese pond, Silwood Park, UK	51.4074	-0.640526	Epibiont on Asellus sp.	2015_05_01
Rg_MAG2	Rotaria magnacalcarata Parsons, 1892	Rg	Japanese pond, Silwood Park, UK	51.4074	-0.640526	Epibiont on Asellus sp.	2015_05_01
Rg_MAG3	Rotaria magnacalcarata Parsons, 1892	Rg	Japanese pond, Silwood Park, UK	51.4074	-0.640526	Epibiont on Asellus sp.	2015_05_01
Rg_RM15	Rotaria magnacalcarata Parsons, 1892	Rg	Freshwater spring, Fontaneto d'Agogna, Italy	45.6409	8.48619	Epibiont on Asellus sp.	2016_04_20	DNA extracted from a single animal	A978_RM15
Rg_RM9	Rotaria magnacalcarata Parsons, 1892	Rg	Freshwater spring, Fontaneto d'Agogna, Italy	45.6409	8.48619	Epibiont on Asellus sp.	2016_04_20	DNA extracted from a single animal	A978_RM9
Rp_RPSE411	Rotaria 'Silwood 2'	Rp	Field pond, Silwood Park, UK	51.4125	-0.642222	Wet mud and silt from temporary pond, East edge, 1m from waterline	2019_01_24	DNA extracted on 2019_02_14 from a single animal, which was the second offspring produced by an individual isolated from the mud sample on 2019_01_25. Sister to RPSE503.	E19A6
Rp_RPSE503	Rotaria 'Silwood 2'	Rp	Field pond, Silwood Park, UK	51.4125	-0.642222	Wet mud and silt from temporary pond, East edge, 1m from waterline	2019_01_24	DNA extracted on 2019_02_05 from a single animal, which was the first offspring produced by an individual isolated from the mud sample on 2019_01_25. Sister to RPSE411.	E19A6
Rp_RPSE809	Rotaria 'Silwood 2'	Rp	Field pond, Silwood Park, UK	51.4125	-0.642222	Wet mud and silt from temporary pond, East edge, 1m from waterline	2018_08_02	DNA extracted from a single starved individual, isolated on 2019_01_28 after 3 generations of clonal lab growth from a single original founder. Different original sample to SE18Y.	E18Z
Rp_RPSE812	Rotaria 'Silwood 2'	Rp	Field pond, Silwood Park, UK	51.4125	-0.642222	Wet mud and silt from temporary pond, Southeast edge, 1m from waterline	2018_08_02	DNA extracted from a single starved individual, isolated on 2019_01_28 after 3 generations of clonal lab growth from a single original founder. Different original sample to E18Z	SE18Y
Rs_AK11	Rotaria socialis Kellicott, 1888	Rs	Japanese pond, Silwood Park, UK	51.4074	-0.640526	Epibiont on Asellus sp.	2016_04_14	DNA extracted from a single animal isolated from the same Asellus host animal as AK15.
Rs_AK15	Rotaria socialis Kellicott, 1888	Rs	Japanese pond, Silwood Park, UK	51.4074	-0.640526	Epibiont on Asellus sp.	2016_04_14	DNA extracted from a single animal isolated from the same Asellus host animal as AK11.
Rs_AK16	Rotaria socialis Kellicott, 1888	Rs	Freshwater stream, Chobham, UK			Epibiont on Asellus sp.	2016_04_18	DNA extracted from a single animal
Rs_AK27	Rotaria socialis Kellicott, 1888	Rs	Lily pond, Silwood Park, UK	51.4084	-0.640656	Epibiont on Asellus sp.	2016_04_21	DNA extracted from a single animal
Rs_RS1	Rotaria socialis Kellicott, 1888	Rs	Freshwater spring, Fontaneto d'Agogna, Italy	45.6409	8.48619	Epibiont on Asellus sp.	2016_04_20	DNA extracted from a single animal	A978_RS1
Rs_RSOC-MP	Rotaria socialis Kellicott, 1888	Rs	Japanese pond, Silwood Park, UK	51.4074	-0.640526	Epibiont on Asellus sp.	2016_04_18
Rw_10x	Rotaria 'Silwood 1'	Rw	Field pond, Silwood Park, UK	51.4125	-0.642222	Wet mud and silt from temporary pond, North edge, 1m from waterline	2017_09_28	DNA extracted on 2018_11_19 from approximately 7000 individuals reared from a single individual collected from nature, after ca.15 clonal laboratory generations	N17X
Rw_RSIL801	Rotaria 'Silwood 1'	Rw	Field pond, Silwood Park, UK	51.4125	-0.642222	Wet mud and silt from temporary pond, North edge, 1m from waterline	2017_09_28	DNA extracted from a single starved individual, isolated on 2019_01_28 from the same dish and clonal line (N17X) as RSIL802.	N17X
Rw_RSIL802	Rotaria 'Silwood 1'	Rw	Field pond, Silwood Park, UK	51.4125	-0.642222	Wet mud and silt from temporary pond, North edge, 1m from waterline	2017_09_28	DNA extracted from a single starved individual, isolated on 2019_01_28 from the same dish and clonal line (N17X) as RSIL801	N17X
Rw_RSIL804	Rotaria 'Silwood 1'	Rw	Field pond, Silwood Park, UK	51.4125	-0.642222	Wet mud and silt from temporary pond, Northeast edge, 1m from waterline	2017_09_28	DNA extracted from a single starved individual, isolated on 2019_01_28 from a clonal line reared in laboratory for 15-20 generations. Originally isolated from a different sample in a different part of the pond to N17X.	NE17Y
Rw_RSIL806	Rotaria 'Silwood 1'	Rw	Field pond, Silwood Park, UK	51.4125	-0.642222	Wet mud and silt from temporary pond, Northeast edge, 1m from waterline	2018_08_02	DNA extracted from a single starved individual, isolated on 2019_01_28 from a clonal line reared in laboratory for 5 generations. Isolated from the pond at a different timepoint to NE17Y, but within 1m of the same location.	NE18Q

## Sheet: Read counts
Sample ID	DNA extraction	Library description	Library type	Sequencing platform	Read length	Insert size	Reads (raw)	Reads (filtered)	%	Bases (filtered)	%
Ar_ARIC003	Chelex (Bio-Rad InstaGene Matrix) Protocol (modified), then Whole Genome Amplification (WGA) via REPLI-g Single Cell Kit (Qiagen)	WGA (multiple clonal individuals, whole-genome amplification)	TruSeq DNA Nano	Illumina HiSeq X	150 PE	350 bp	90546234	80883448	0.893283	12116268708	0.892087
As_10x	Chromium Demonstrated Protocol: HMW gDNA Extraction from Single Insects (modified)	WGS (multiple clonal individuals, 10x Genomics library prep)	10X Genomics	Illumina HiSeq X	150 PE	300 bp	624118556	244568726	0.391863	33872768551	0.36182
As_ASTE804	Chelex (Bio-Rad InstaGene Matrix) Protocol (modified), then Whole Genome Amplification (WGA) via REPLI-g Single Cell Kit (Qiagen)	WGA (single individual, whole-genome amplification)	TruSeq DNA Nano	Illumina HiSeq X	150 PE	350 bp	91447394	66193182	0.723839	9912822912	0.722661
As_ASTE805	Chelex (Bio-Rad InstaGene Matrix) Protocol (modified), then Whole Genome Amplification (WGA) via REPLI-g Single Cell Kit (Qiagen)	WGA (single individual, whole-genome amplification)	TruSeq DNA Nano	Illumina HiSeq X	150 PE	350 bp	87974498	67834632	0.771072	10160497392	0.769958
As_ASTE806	Chelex (Bio-Rad InstaGene Matrix) Protocol (modified), then Whole Genome Amplification (WGA) via REPLI-g Single Cell Kit (Qiagen)	WGA (single individual, whole-genome amplification)	TruSeq DNA Nano	Illumina HiSeq X	150 PE	350 bp	98375830	87463100	0.889071	13100083924	0.887758
Bc_PSC1	Phenol-chloroform extraction	WGS (multiple clonal individuals)		Illumina NextSeq500	150 PE	350 bp	876886528	791205226	0.902289	111299527227	0.846172
Dc_DCAR505	QIAamp DNA Micro Kit, then Whole Genome Amplification (WGA) via REPLI-g Single Cell Kit (Qiagen)	WGA (single individual, whole-genome amplification)	TruSeq DNA Nano	Illumina HiSeq X	150 PE	350 bp	77230960	45616728	0.590653	6829254964	0.589509
Dc_DCAR706	QIAamp DNA Micro Kit, then Whole Genome Amplification (WGA) via REPLI-g Single Cell Kit (Qiagen)	WGA (single individual, whole-genome amplification)	TruSeq DNA Nano	Illumina HiSeq X	150 PE	350 bp	189048254	185492312	0.98119	27883186784	0.983283
Rd_10x	Chromium Demonstrated Protocol: HMW gDNA Extraction from Single Insects (modified)	WGS (multiple clonal individuals, 10x Genomics library prep)	10X Genomics	Illumina HiSeq X	150 PE	300 bp	612876150	178853646	0.291827	24771229971	0.269453
Rd_RSOR408	QIAamp DNA Micro Kit, then Whole Genome Amplification (WGA) via REPLI-g Single Cell Kit (Qiagen)	WGA (single individual, whole-genome amplification)	TruSeq DNA Nano	Illumina HiSeq X	150 PE	350 bp	76463738	66687360	0.872144	9987168740	0.870754
Rd_RSOR410	QIAamp DNA Micro Kit, then Whole Genome Amplification (WGA) via REPLI-g Single Cell Kit (Qiagen)	WGA (single individual, whole-genome amplification)	TruSeq DNA Nano	Illumina HiSeq X	150 PE	350 bp	87507942	70495958	0.805595	10556843516	0.804258
Rd_RSOR504	QIAamp DNA Micro Kit, then Whole Genome Amplification (WGA) via REPLI-g Single Cell Kit (Qiagen)	WGA (single individual, whole-genome amplification)	TruSeq DNA Nano	Illumina HiSeq X	150 PE	350 bp	84525272	66113600	0.782176	9900789234	0.780894
Rg_MAG1	Chelex (Bio-Rad InstaGene Matrix) Protocol (modified), then Whole Genome Amplification (WGA) via REPLI-g Single Cell Kit (Qiagen)	WGA (single individual, whole-genome amplification)	TruSeq DNA Nano	Illumina NextSeq500	150 PE	550 bp	102870142	68919258	0.669964	10316156338	0.668555
Rg_MAG2	Chelex (Bio-Rad InstaGene Matrix) Protocol (modified), then Whole Genome Amplification (WGA) via REPLI-g Single Cell Kit (Qiagen)	WGA (single individual, whole-genome amplification)	TruSeq DNA Nano	Illumina NextSeq500	150 PE	550 bp	111765904	76415078	0.683707	11440293080	0.682396
Rg_MAG3	Chelex (Bio-Rad InstaGene Matrix) Protocol (modified), then Whole Genome Amplification (WGA) via REPLI-g Single Cell Kit (Qiagen)	WGA (single individual, whole-genome amplification)	TruSeq DNA Nano	Illumina NextSeq500	150 PE	550 bp	106495114	72475834	0.680555	10850367681	0.67924
Rg_RM15	Chelex (Bio-Rad InstaGene Matrix) Protocol (modified), then Whole Genome Amplification (WGA) via REPLI-g Single Cell Kit (Qiagen)	WGA (single individual, whole-genome amplification)	TruSeq DNA Nano	Illumina NextSeq500	150 PE	550 bp	103666224	63862192	0.616037	9559773492	0.614779
Rg_RM9	Chelex (Bio-Rad InstaGene Matrix) Protocol (modified), then Whole Genome Amplification (WGA) via REPLI-g Single Cell Kit (Qiagen)	WGA (single individual, whole-genome amplification)	TruSeq DNA Nano	Illumina NextSeq500	150 PE	550 bp	106488692	58987854	0.553935	8829392530	0.552759
Rp_RPSE411	QIAamp DNA Micro Kit, then Whole Genome Amplification (WGA) via REPLI-g Single Cell Kit (Qiagen)	WGA (single individual, whole-genome amplification)	TruSeq DNA Nano	Illumina HiSeq X	150 PE	350 bp	90429804	68865428	0.761535	10312585848	0.760265
Rp_RPSE503	QIAamp DNA Micro Kit, then Whole Genome Amplification (WGA) via REPLI-g Single Cell Kit (Qiagen)	WGA (single individual, whole-genome amplification)	TruSeq DNA Nano	Illumina HiSeq X	150 PE	350 bp	78755626	65069966	0.826226	9745127944	0.824925
Rp_RPSE809	QIAamp DNA Micro Kit, then Whole Genome Amplification (WGA) via REPLI-g Single Cell Kit (Qiagen)	WGA (single individual, whole-genome amplification)	TruSeq DNA Nano	Illumina HiSeq X	150 PE	350 bp	76943028	48066418	0.624701	7198277172	0.623689
Rp_RPSE812	QIAamp DNA Micro Kit, then Whole Genome Amplification (WGA) via REPLI-g Single Cell Kit (Qiagen)	WGA (single individual, whole-genome amplification)	TruSeq DNA Nano	Illumina HiSeq X	150 PE	350 bp	81408292	47901736	0.588413	7172405988	0.587361
Rs_AK11	Chelex (Bio-Rad InstaGene Matrix) Protocol (modified), then Whole Genome Amplification (WGA) via REPLI-g Single Cell Kit (Qiagen)	WGA (single individual, whole-genome amplification)	TruSeq DNA Nano	Illumina NextSeq500	150 PE	550 bp	54673776	38559640	0.705268	5773152265	0.703951
Rs_AK15	Chelex (Bio-Rad InstaGene Matrix) Protocol (modified), then Whole Genome Amplification (WGA) via REPLI-g Single Cell Kit (Qiagen)	WGA (single individual, whole-genome amplification)	TruSeq DNA Nano	Illumina NextSeq500	150 PE	550 bp	55197398	36914776	0.668777	5525206504	0.667327
Rs_AK16	Chelex (Bio-Rad InstaGene Matrix) Protocol (modified), then Whole Genome Amplification (WGA) via REPLI-g Single Cell Kit (Qiagen)	WGA (single individual, whole-genome amplification)	TruSeq DNA Nano	Illumina NextSeq500	150 PE	550 bp	61120294	42317794	0.692369	6336253558	0.691124
Rs_AK27	Chelex (Bio-Rad InstaGene Matrix) Protocol (modified), then Whole Genome Amplification (WGA) via REPLI-g Single Cell Kit (Qiagen)	WGA (single individual, whole-genome amplification)	TruSeq DNA Nano	Illumina NextSeq500	150 PE	550 bp	57401348	36136526	0.629541	5410602049	0.628394
Rs_RS1	Chelex (Bio-Rad InstaGene Matrix) Protocol (modified), then Whole Genome Amplification (WGA) via REPLI-g Single Cell Kit (Qiagen)	WGA (single individual, whole-genome amplification)	TruSeq DNA Nano	Illumina NextSeq500	150 PE	550 bp	66501710	40378004	0.607172	6045873382	0.606087
Rs_RSOC-MP	Chelex (Bio-Rad InstaGene Matrix) Protocol (modified), then Whole Genome Amplification (WGA) via REPLI-g Single Cell Kit (Qiagen)	WGA (single individual, whole-genome amplification)	TruSeq DNA Nano	Illumina HiSeq 4000	150 PE	3000 bp	246779748	120198790	0.487069	15642401695	0.422574
Rw_10x	Chromium Demonstrated Protocol: HMW gDNA Extraction from Single Insects (modified)	WGS (multiple clonal individuals, 10x Genomics library prep)	10X Genomics	Illumina HiSeq X	150 PE	300 bp	624118556	117918196	0.188936	16331670146	0.174451
Rw_RSIL801	QIAamp DNA Micro Kit, then Whole Genome Amplification (WGA) via REPLI-g Single Cell Kit (Qiagen)	WGA (single individual, whole-genome amplification)	TruSeq DNA Nano	Illumina HiSeq X	150 PE	350 bp	92850226	79792134	0.859364	11950581638	0.858054
Rw_RSIL802	QIAamp DNA Micro Kit, then Whole Genome Amplification (WGA) via REPLI-g Single Cell Kit (Qiagen)	WGA (single individual, whole-genome amplification)	TruSeq DNA Nano	Illumina HiSeq X	150 PE	350 bp	81205940	70734092	0.871046	10593691300	0.869698
Rw_RSIL804	QIAamp DNA Micro Kit, then Whole Genome Amplification (WGA) via REPLI-g Single Cell Kit (Qiagen)	WGA (single individual, whole-genome amplification)	TruSeq DNA Nano	Illumina HiSeq X	150 PE	350 bp	78295752	56926380	0.727069	8522841598	0.725696
Rw_RSIL806	QIAamp DNA Micro Kit, then Whole Genome Amplification (WGA) via REPLI-g Single Cell Kit (Qiagen)	WGA (single individual, whole-genome amplification)	TruSeq DNA Nano	Illumina HiSeq X	150 PE	350 bp	72383298	60545852	0.836462	9068102004	0.835193

## Sheet: Accession numbers
Sample ID	NCBI taxid	Study accession (umbrella)	Study accession (reference)	Study accession (maxhap)	Sample accession	Run accession(s)	Genome accession (reference)	Contig accession (reference)	Genome accession (maxhap)	Contig accession (maxhap)	Locus tag (reference)	Locus tag (maxhap)
Ar_ARIC003	249248	PRJEB43248	PRJEB43239	PRJEB43238	ERS5804338	ERR4467412	GCA_905250025	CAJNOJ010000001-CAJNOJ010004302	GCA_905250095	CAJNOR010000001-CAJNOR010022742	EDS130	XAT740
As_10x	433720	PRJEB43248	PRJEB43239	PRJEB43238	ERS5803318	ERR4468314	GCA_905250115	CAJNOI010000001-CAJNOI010008257	GCA_905250015	CAJNOM010000001-CAJNOM010008705	BJG266	QVE165
As_ASTE804	433720	PRJEB43248	PRJEB43239	PRJEB43238	ERS5804339	ERR4467304	GCA_905250045	CAJNOG010000001-CAJNOG010009359	GCA_905332015	CAJOAZ010000001-CAJOAZ010034092	JYZ213	OXD698
As_ASTE805	433720	PRJEB43248	PRJEB43239	PRJEB43238	ERS5804340	ERR4467230	GCA_905250065	CAJNON010000001-CAJNON010009008	GCA_905332035	CAJOAY010000001-CAJOAY010039093	VCS650	OKA104
As_ASTE806	433720	PRJEB43248	PRJEB43239	PRJEB43238	ERS5804341	ERR4467307	GCA_905250035	CAJNOE010000001-CAJNOE010007597	GCA_905332045	CAJOBB010000001-CAJOBB010032429	IZO911	KXQ929
Bc_PSC1	104777	PRJEB43248	PRJEB43239	-	SAMN15803692	SRR12443467,SRR12443466,SRR12439285,SRR12439284	GCA_905250105	CAJNOC010000001-CAJNOC010014869	-	-	OXX778	-
Dc_DCAR505	1234261	PRJEB43248	PRJEB43239	PRJEB43238	ERS5804342	ERR4467385	GCA_905249995	CAJNOK010000001-CAJNOK010087048	GCA_905332075	CAJOBA010000001-CAJOBA010121494	OVA965	TMI583
Dc_DCAR706	1234261	PRJEB43248	PRJEB43239	PRJEB43238	ERS5804343	ERR4467442	GCA_905250885	CAJNOQ010000001-CAJNOQ010078356	GCA_905332065	CAJOBC010000001-CAJOBC010165346	GPM918	SRO942
Rd_10x	392033	PRJEB43248	PRJEB43239	PRJEB43238	ERS5803319	ERR4468316	GCA_905250005	CAJNOH010000001-CAJNOH010016571	GCA_905250125	CAJNOL010000001-CAJNOL010018468	PYM288	JXQ802
Rd_RSOR408	392033	PRJEB43248	PRJEB43239	PRJEB43238	ERS5804344	ERR4467411	GCA_905250875	CAJNOO010000001-CAJNOO010020315	GCA_905332085	CAJOAX010000001-CAJOAX010073081	RFH988	OTI717
Rd_RSOR410	392033	PRJEB43248	PRJEB43239	PRJEB43238	ERS5804345	ERR4467413	GCA_905251635	CAJNOT010000001-CAJNOT010019518	GCA_905332095	CAJOBD010000001-CAJOBD010069564	ZHD862	JBS370
Rd_RSOR504	392033	PRJEB43248	PRJEB43239	PRJEB43238	ERS5804346	ERR4467414	GCA_905252715	CAJNOU010000001-CAJNOU010022067	GCA_905332105	CAJOBE010000001-CAJOBE010069184	SEV965	FNK824
Rg_MAG1	392030	PRJEB43248	PRJEB43239	PRJEB43238	ERS5804347	ERR2983754,ERR2983755,ERR2983756,ERR2983757,ERR2983766,ERR2983767,ERR2983768,ERR2983769	GCA_905261645	CAJNOV010000001-CAJNOV010019184	GCA_905332115	CAJOBH010000001-CAJOBH010293619	CJN711	BYL167
Rg_MAG2	392030	PRJEB43248	PRJEB43239	PRJEB43238	ERS5804348	ERR2983780,ERR2983781,ERR2983782,ERR2983783,ERR2983784,ERR2983785,ERR2983786,ERR2983787	GCA_905273325	CAJNOW010000001-CAJNOW010022216	GCA_905332125	CAJOBJ010000001-CAJOBJ010386620	KQP761	GIL414
Rg_MAG3	392030	PRJEB43248	PRJEB43239	PRJEB43238	ERS5804349	ERR2983788,ERR2983789,ERR2983790,ERR2983791,ERR2983813,ERR2983814,ERR2983815,ERR2983816	GCA_905319835	CAJNRE010000001-CAJNRE010022132	GCA_905332135	CAJOBI010000001-CAJOBI010374008	MBJ925	SMN809
Rg_RM15	392030	PRJEB43248	PRJEB43239	PRJEB43238	ERS5804351	ERR2983859,ERR2983860,ERR2983861,ERR2983862,ERR2983863,ERR2983864,ERR2983865,ERR2983866	GCA_905321285	CAJNRF010000001-CAJNRF010018391	GCA_905332145	CAJOBF010000001-CAJOBF010038569	WKI299	UXM345
Rg_RM9	392030	PRJEB43248	PRJEB43239	PRJEB43238	ERS5804350	ERR2983821,ERR2983822,ERR2983823,ERR2983824,ERR2983833,ERR2983834,ERR2983835,ERR2983836	GCA_905321535	CAJNRG010000001-CAJNRG010019520	GCA_905332155	CAJOBG010000001-CAJOBG010126446	XDN619	OVN521
Rp_RPSE411	2762512	PRJEB43248	PRJEB43239	PRJEB43238	ERS5804352	ERR4467434	GCA_905329745	CAJNSZ010000001-CAJNSZ010030050	GCA_905332165	CAJOBK010000001-CAJOBK010061655	NCT539	ZIB798
Rp_RPSE503	2762512	PRJEB43248	PRJEB43239	PRJEB43238	ERS5804353	ERR4467438	GCA_905330235	CAJNUA010000001-CAJNUA010033174	GCA_905332175	CAJOBL010000001-CAJOBL010068725	DRW283	JQV615
Rp_RPSE809	2762512	PRJEB43248	PRJEB43239	PRJEB43238	ERS5804354	ERR4467410	GCA_905330535	CAJNVN010000001-CAJNVN010028589	GCA_905332185	CAJOBM010000001-CAJOBM010107316	RHK424	RMH319
Rp_RPSE812	2762512	PRJEB43248	PRJEB43239	PRJEB43238	ERS5804355	ERR4467439	GCA_905330805	CAJNWK010000001-CAJNWK010034498	GCA_905332225	CAJOBN010000001-CAJOBN010065539	YTW244	SJO388
Rs_AK11	392032	PRJEB43248	PRJEB43239	PRJEB43238	ERS5804360	ERR2983882,ERR2983883,ERR2983884,ERR2983885	GCA_905331015	CAJNXB010000001-CAJNXB010006303	GCA_905332245	CAJOBP010000001-CAJOBP010115181	TIS948	UJA718
Rs_AK15	392032	PRJEB43248	PRJEB43239	PRJEB43238	ERS5804361	ERR2983908,ERR2983909,ERR2983910,ERR2983911	GCA_905331295	CAJNYD010000001-CAJNYD010005030	GCA_905332235	CAJOBO010000001-CAJOBO010021443	LUA448	HFQ381
Rs_AK16	392032	PRJEB43248	PRJEB43239	PRJEB43238	ERS5804362	ERR2983912,ERR2983913,ERR2983914,ERR2983915	GCA_905331475	CAJNYU010000001-CAJNYU010004720	GCA_905332265	CAJOBQ010000001-CAJOBQ010018665	FME351	TSG867
Rs_AK27	392032	PRJEB43248	PRJEB43239	PRJEB43238	ERS5804363	ERR2983916,ERR2983917,ERR2983918,ERR2983919	GCA_905331485	CAJNYT010000001-CAJNYT010005952	GCA_905332275	CAJOBR010000001-CAJOBR010109049	GRG538	QYT958
Rs_RS1	392032	PRJEB43248	PRJEB43239	PRJEB43238	ERS5804364	ERR2983920,ERR2983921,ERR2983922,ERR2983923	GCA_905331495	CAJNYV010000001-CAJNYV010006254	GCA_905332285	CAJOBS010000001-CAJOBS010020987	KIK155	TOA249
Rs_RSOC-MP	392032	PRJEB43248	PRJEB43239	PRJEB43238	ERS2958081	ERR2984250,ERR2984251,ERR2984252	-	-	-	-	-	-
Rw_10x	2762511	PRJEB43248	PRJEB43239	PRJEB43238	ERS5803317	ERR4468315	GCA_905250055	CAJNOF010000001-CAJNOF010016995	GCA_905250075	CAJNOP010000001-CAJNOP010018466	XKC960	NZN594
Rw_RSIL801	2762511	PRJEB43248	PRJEB43239	PRJEB43238	ERS5804356	ERR4467437	GCA_905331515	CAJNZC010000001-CAJNZC010028549	GCA_905332295	CAJOBT010000001-CAJOBT010073499	DUG663	XPS770
Rw_RSIL802	2762511	PRJEB43248	PRJEB43239	PRJEB43238	ERS5804357	ERR4467440	GCA_905331505	CAJNYZ010000001-CAJNYZ010021286	GCA_905332305	CAJOBU010000001-CAJOBU010069095	NZO219	NFQ510
Rw_RSIL804	2762511	PRJEB43248	PRJEB43239	PRJEB43238	ERS5804358	ERR4467436	GCA_905331525	CAJNZF010000001-CAJNZF010025643	GCA_905332325	CAJOBW010000001-CAJOBW010146178	CBO169	PXF425
Rw_RSIL806	2762511	PRJEB43248	PRJEB43239	PRJEB43238	ERS5804359	ERR4467435	GCA_905331535	CAJNZB010000001-CAJNZB010029968	GCA_905332315	CAJOBV010000001-CAJOBV010087188	LEP731	BAC187
