# Supplementary figures and images for: Evolutionary dynamics of transposable elements in bdelloid rotifers
Source: eLife journal article supplement (doi:10.7554/elife.63194), 2021-02-05

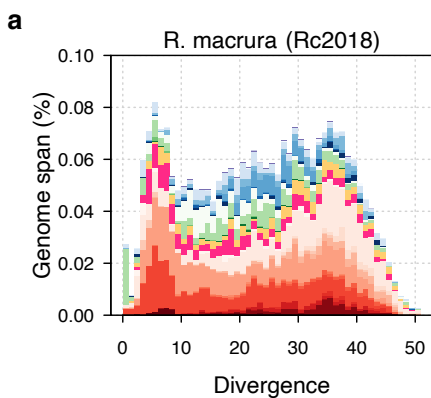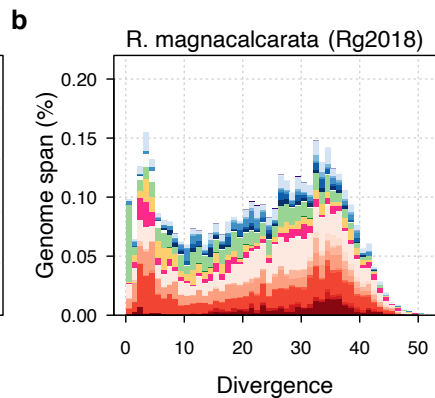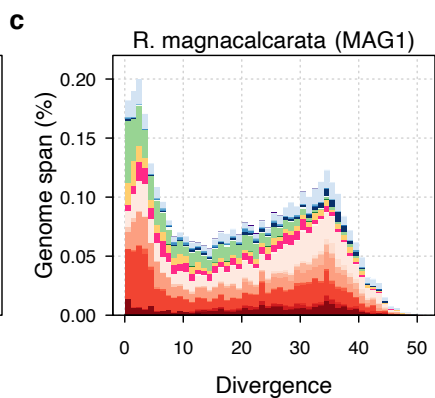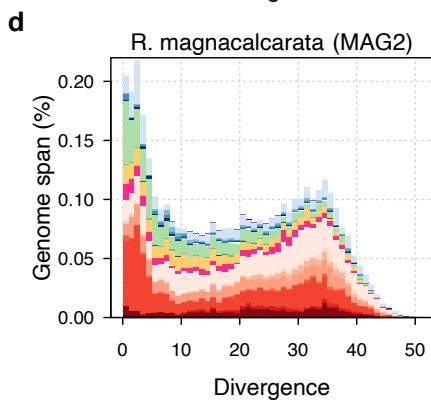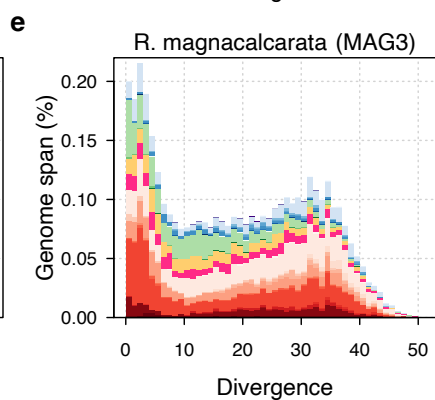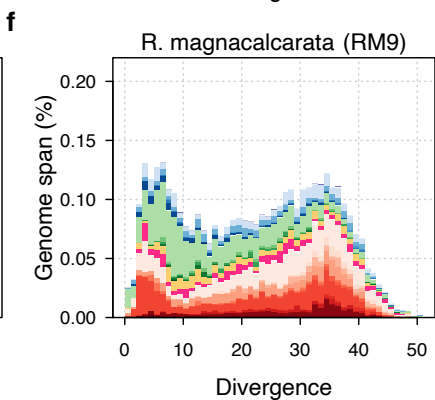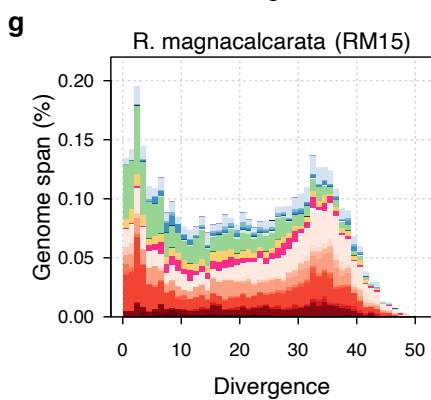

Supplement: supp [file elife-63194-supp-v1.zip]

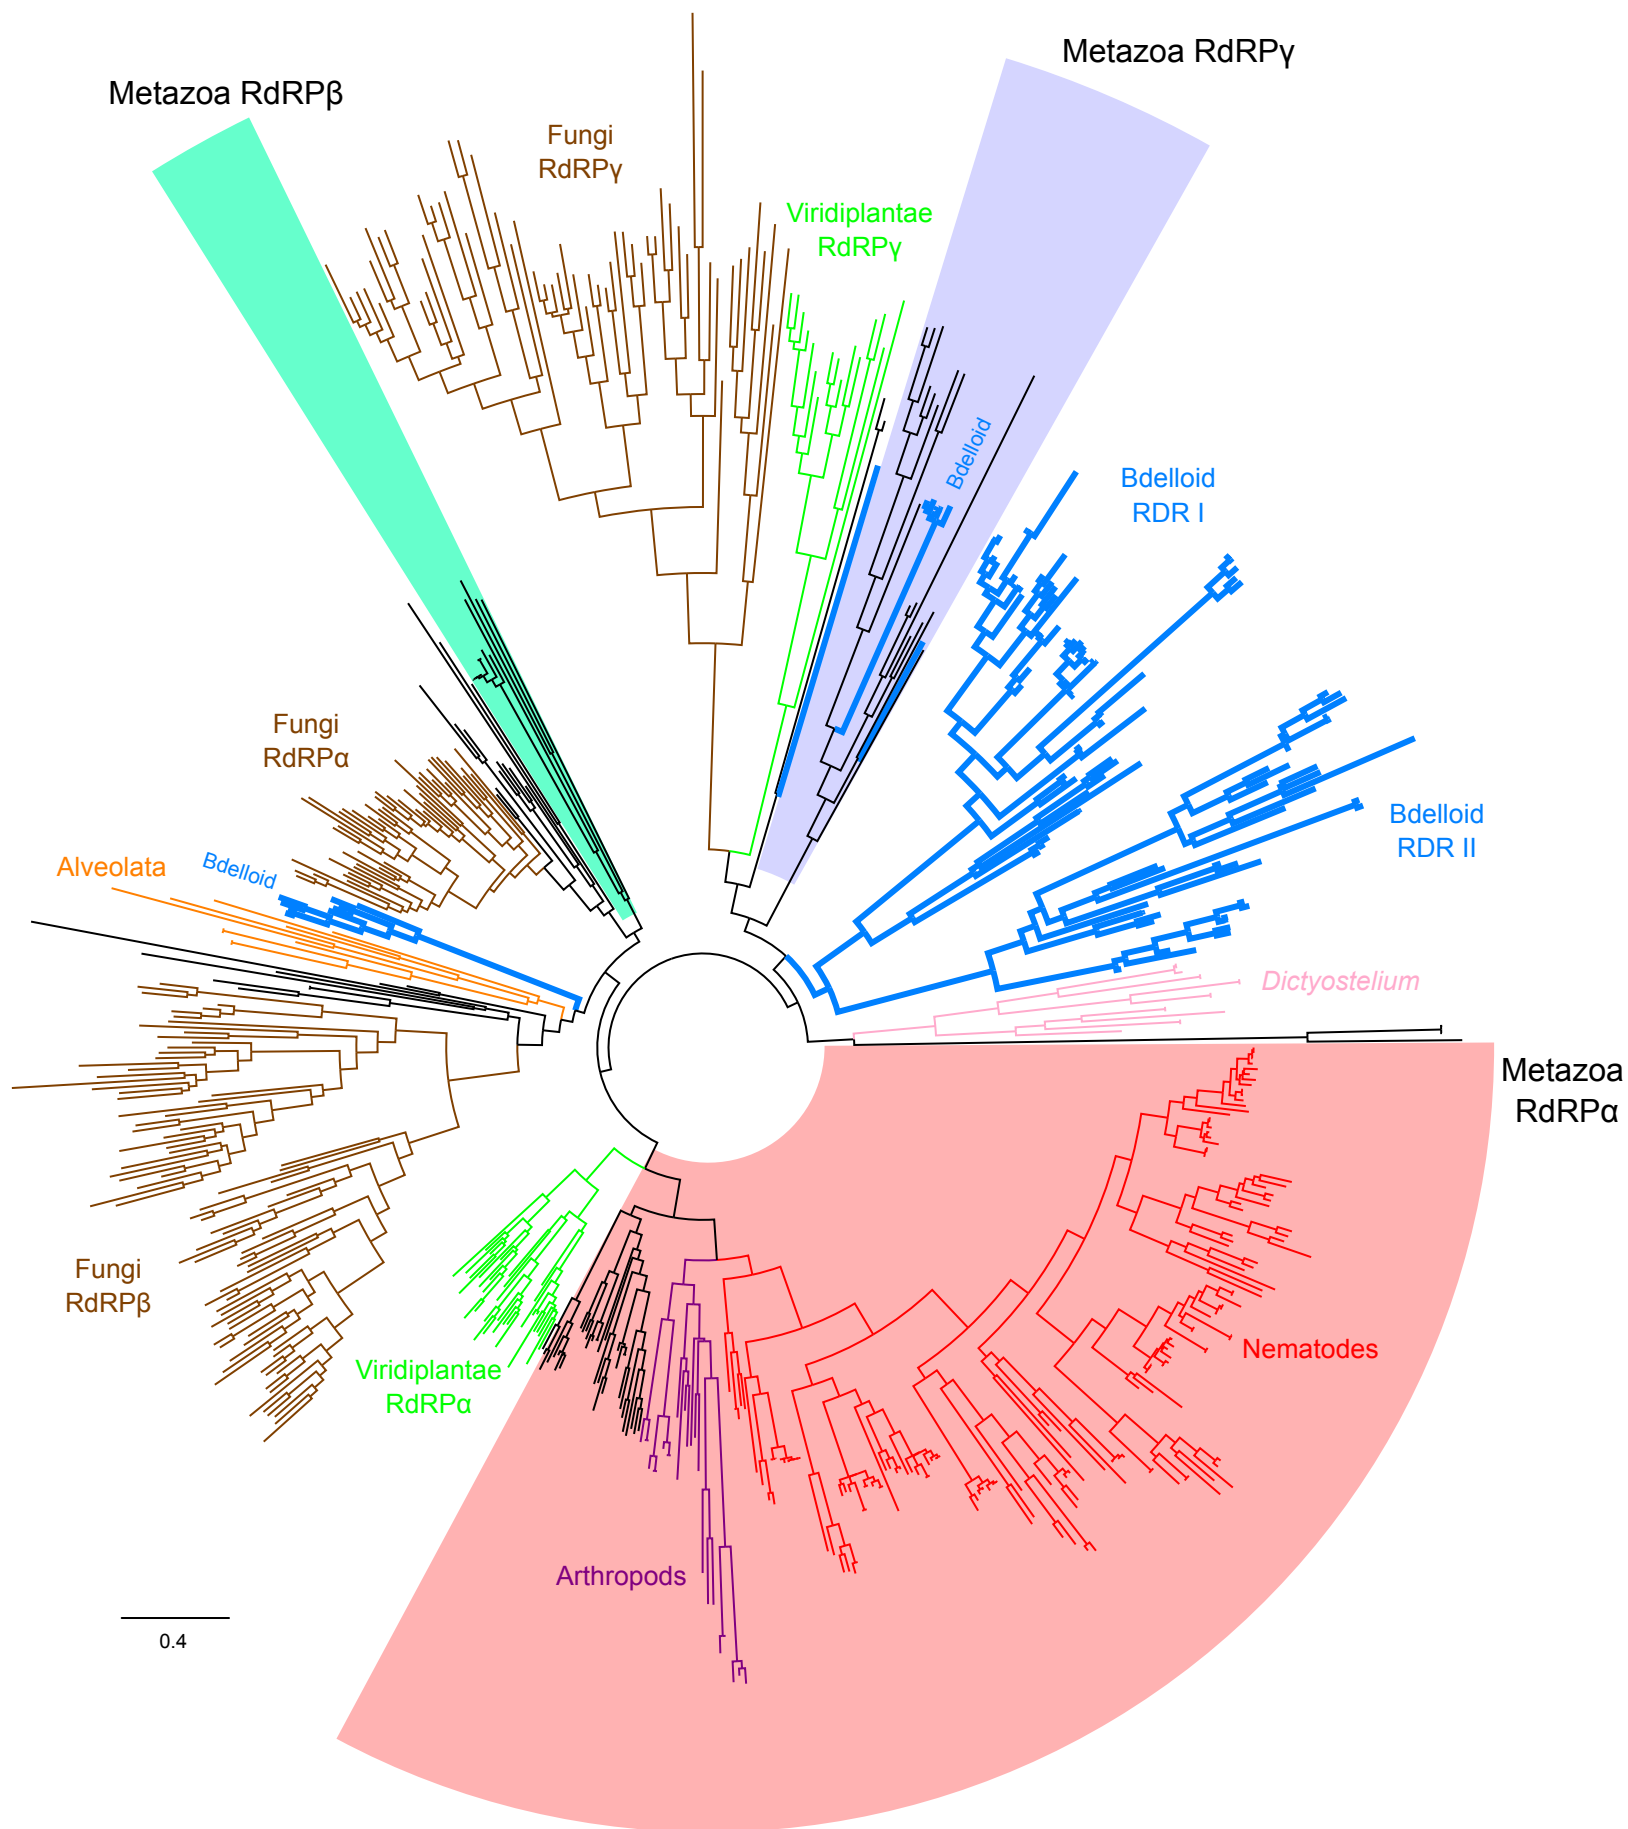

Supplement: supp [file elife-63194-supp-v1.zip]

**a***R. socialis* (AK11)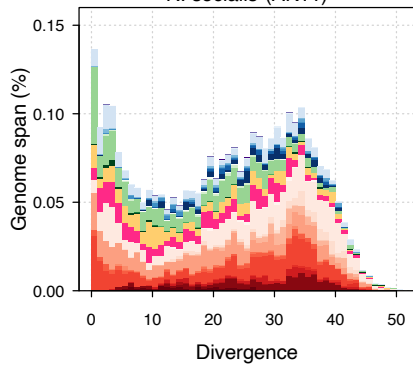**b***R. socialis* (AK15)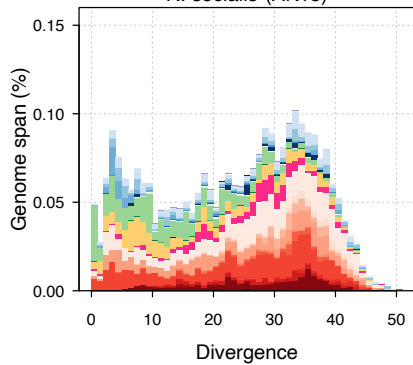**c***R. socialis* (AK16)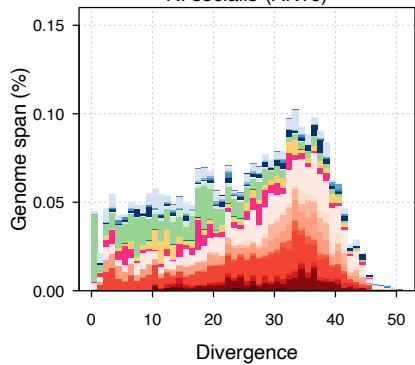**d***R. socialis* (AK27)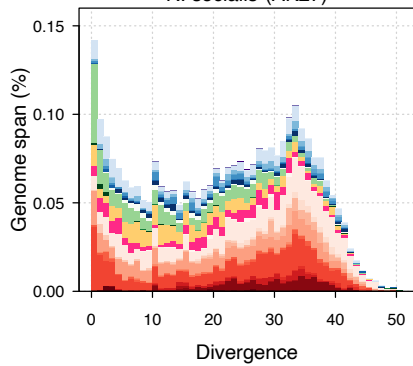**e***R. socialis* (RS1)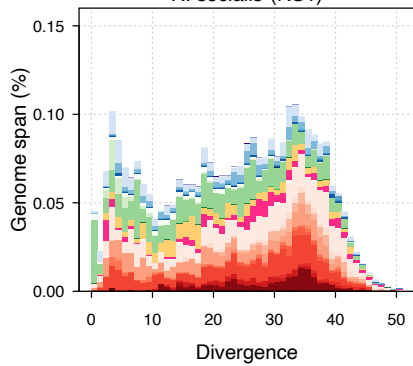

Supplement: supp [file elife-63194-supp-v1.zip]

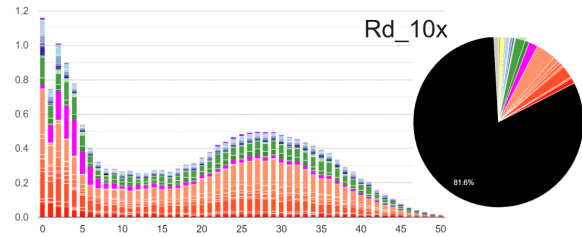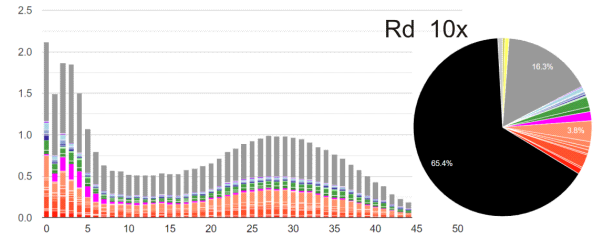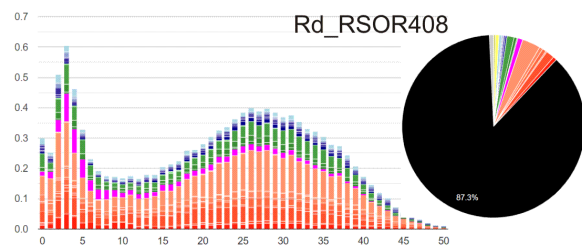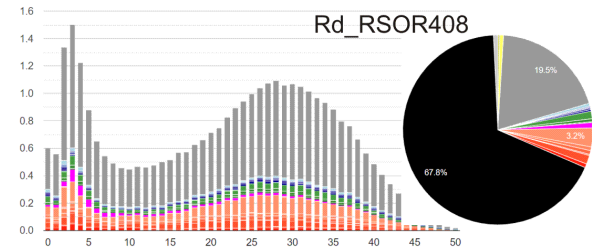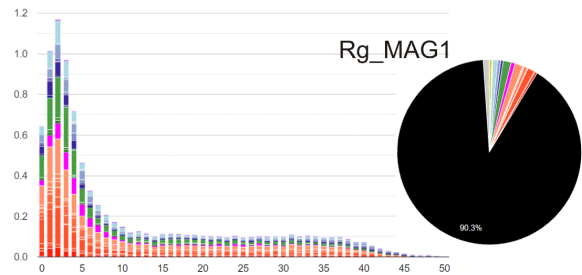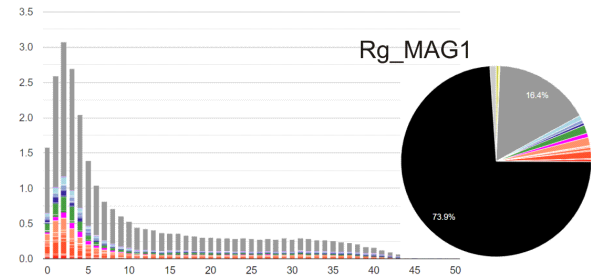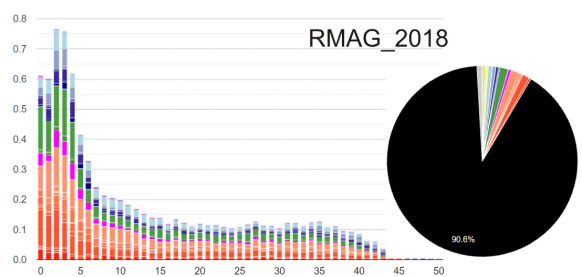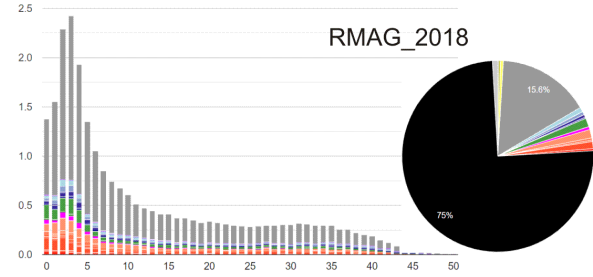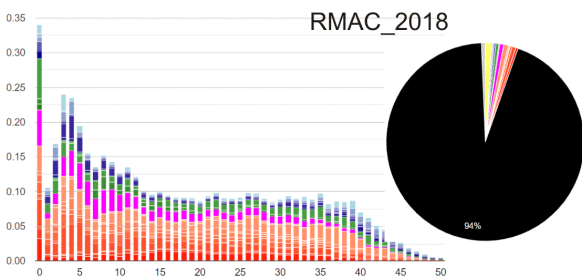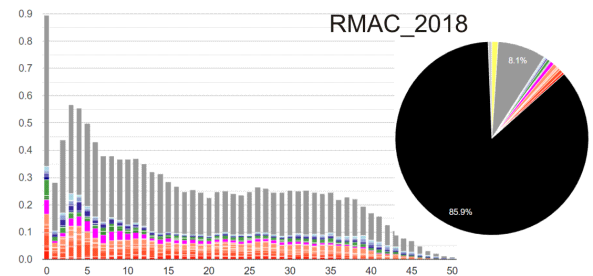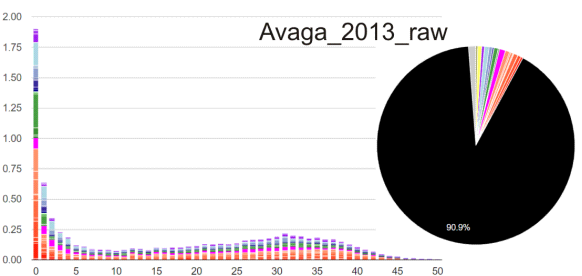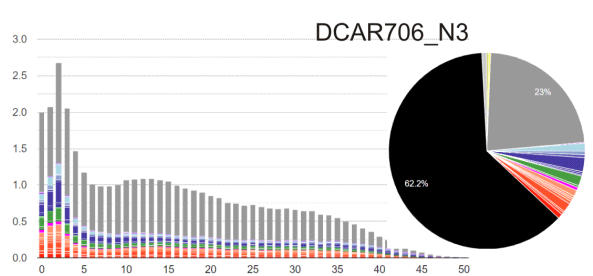

No unknowns

With unknowns

Supplement: supp [file elife-63194-supp-v1.zip]

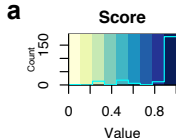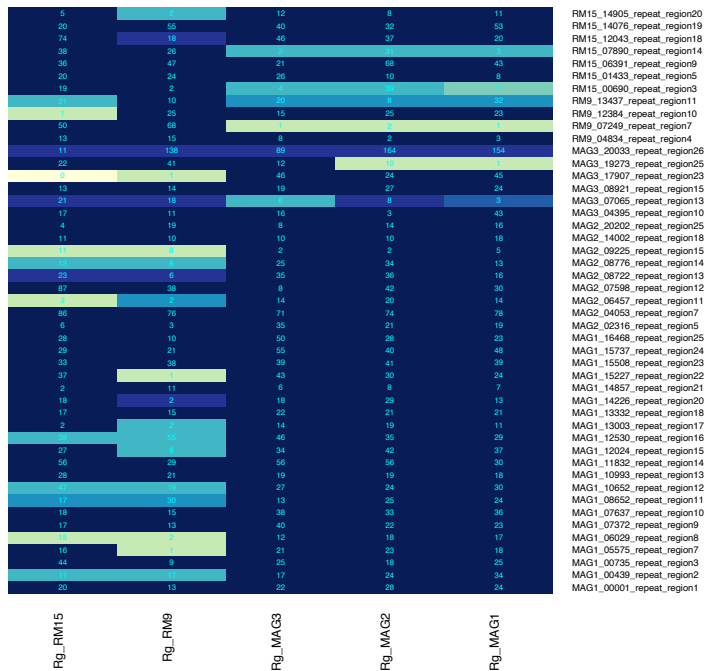

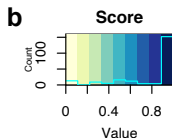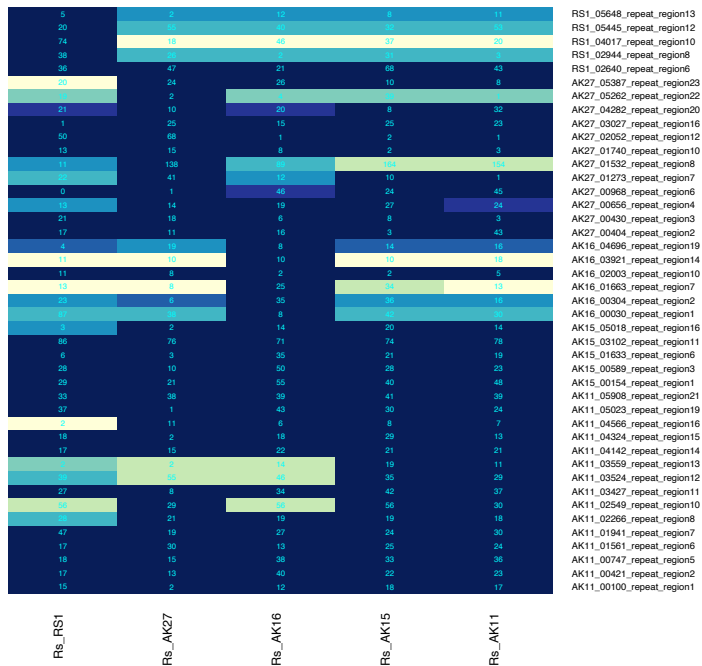

Supplement: supp [file elife-63194-supp-v1.zip]

**a**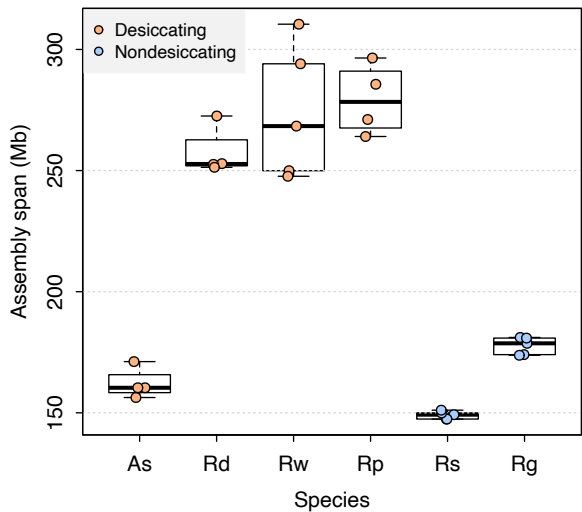**b**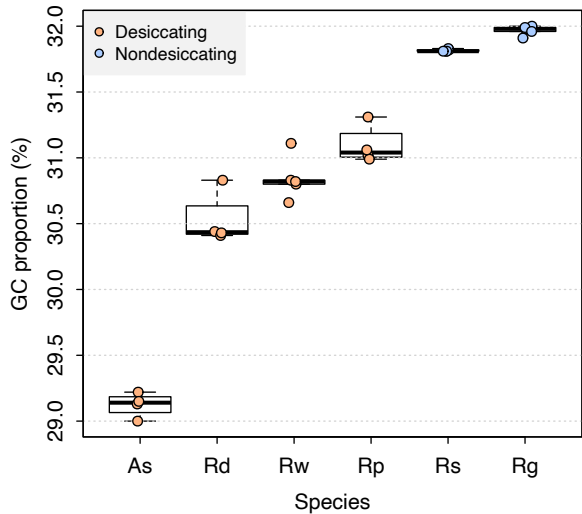

Supplement: supp [file elife-63194-supp-v1.zip]

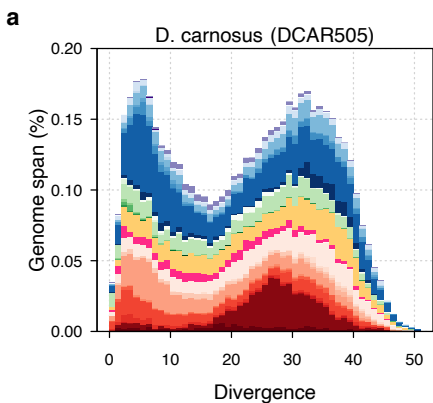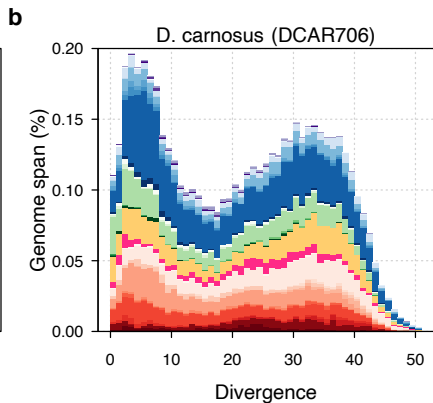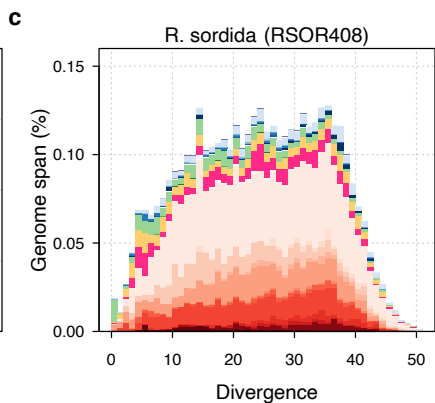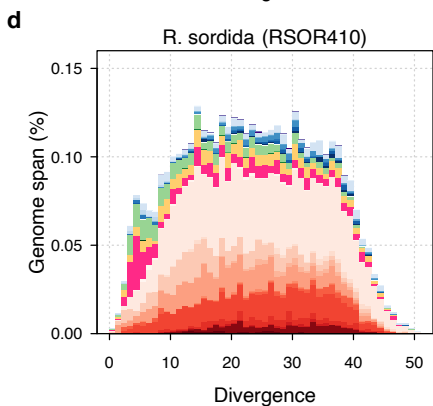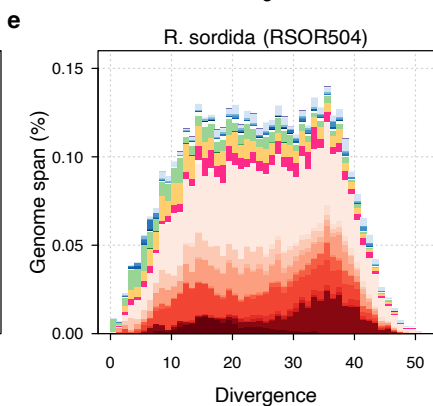

Supplement: supp [file elife-63194-supp-v1.zip]

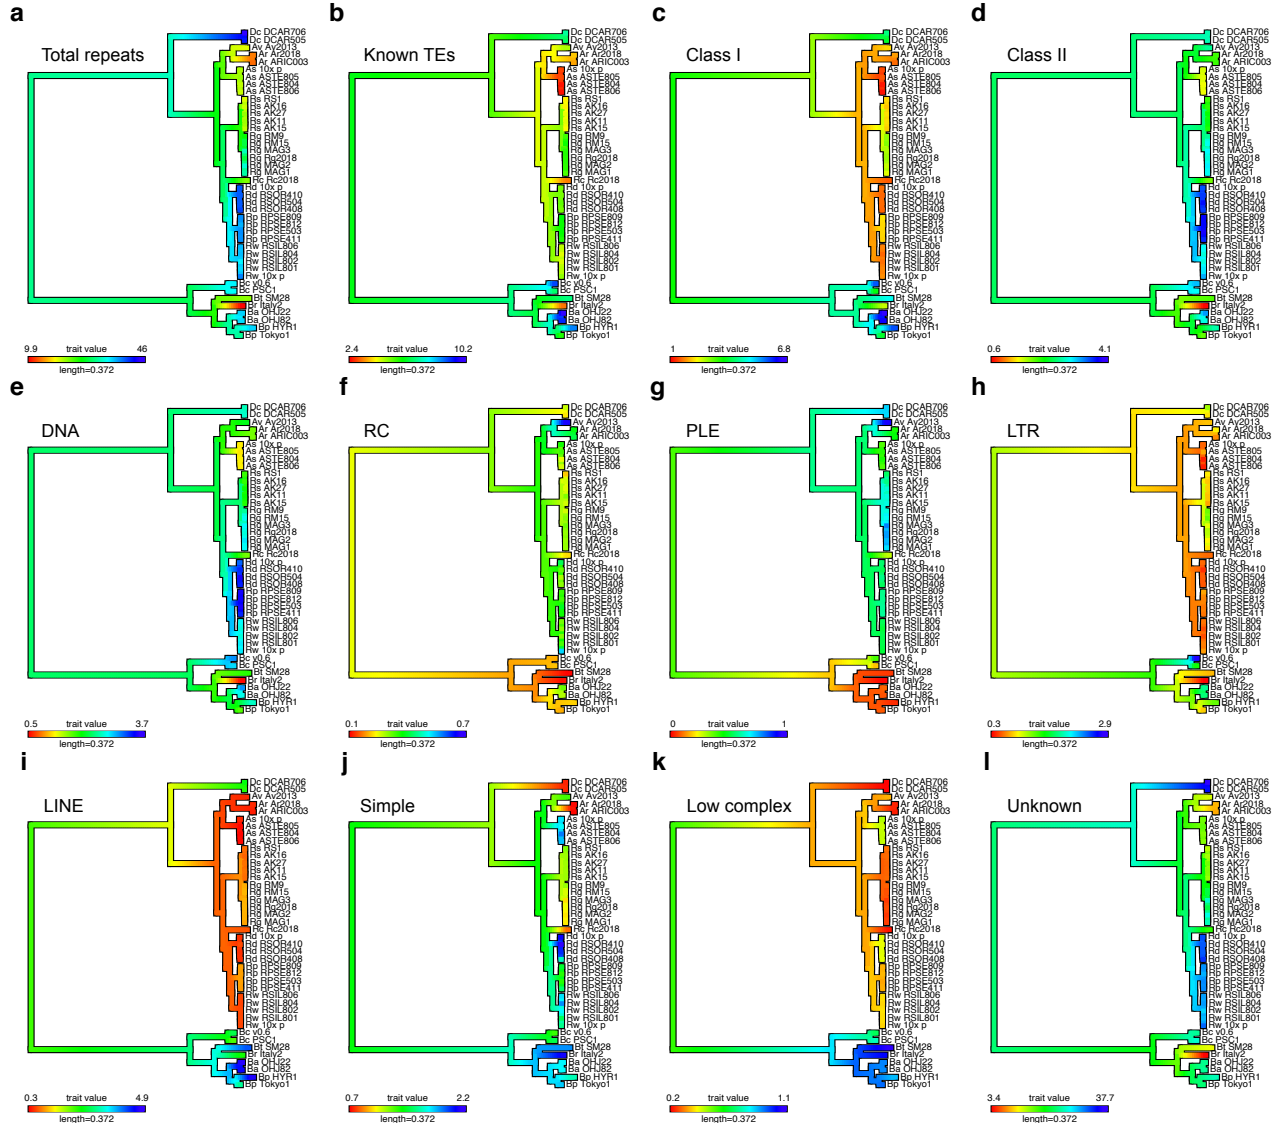

Supplement: supp [file elife-63194-supp-v1.zip]

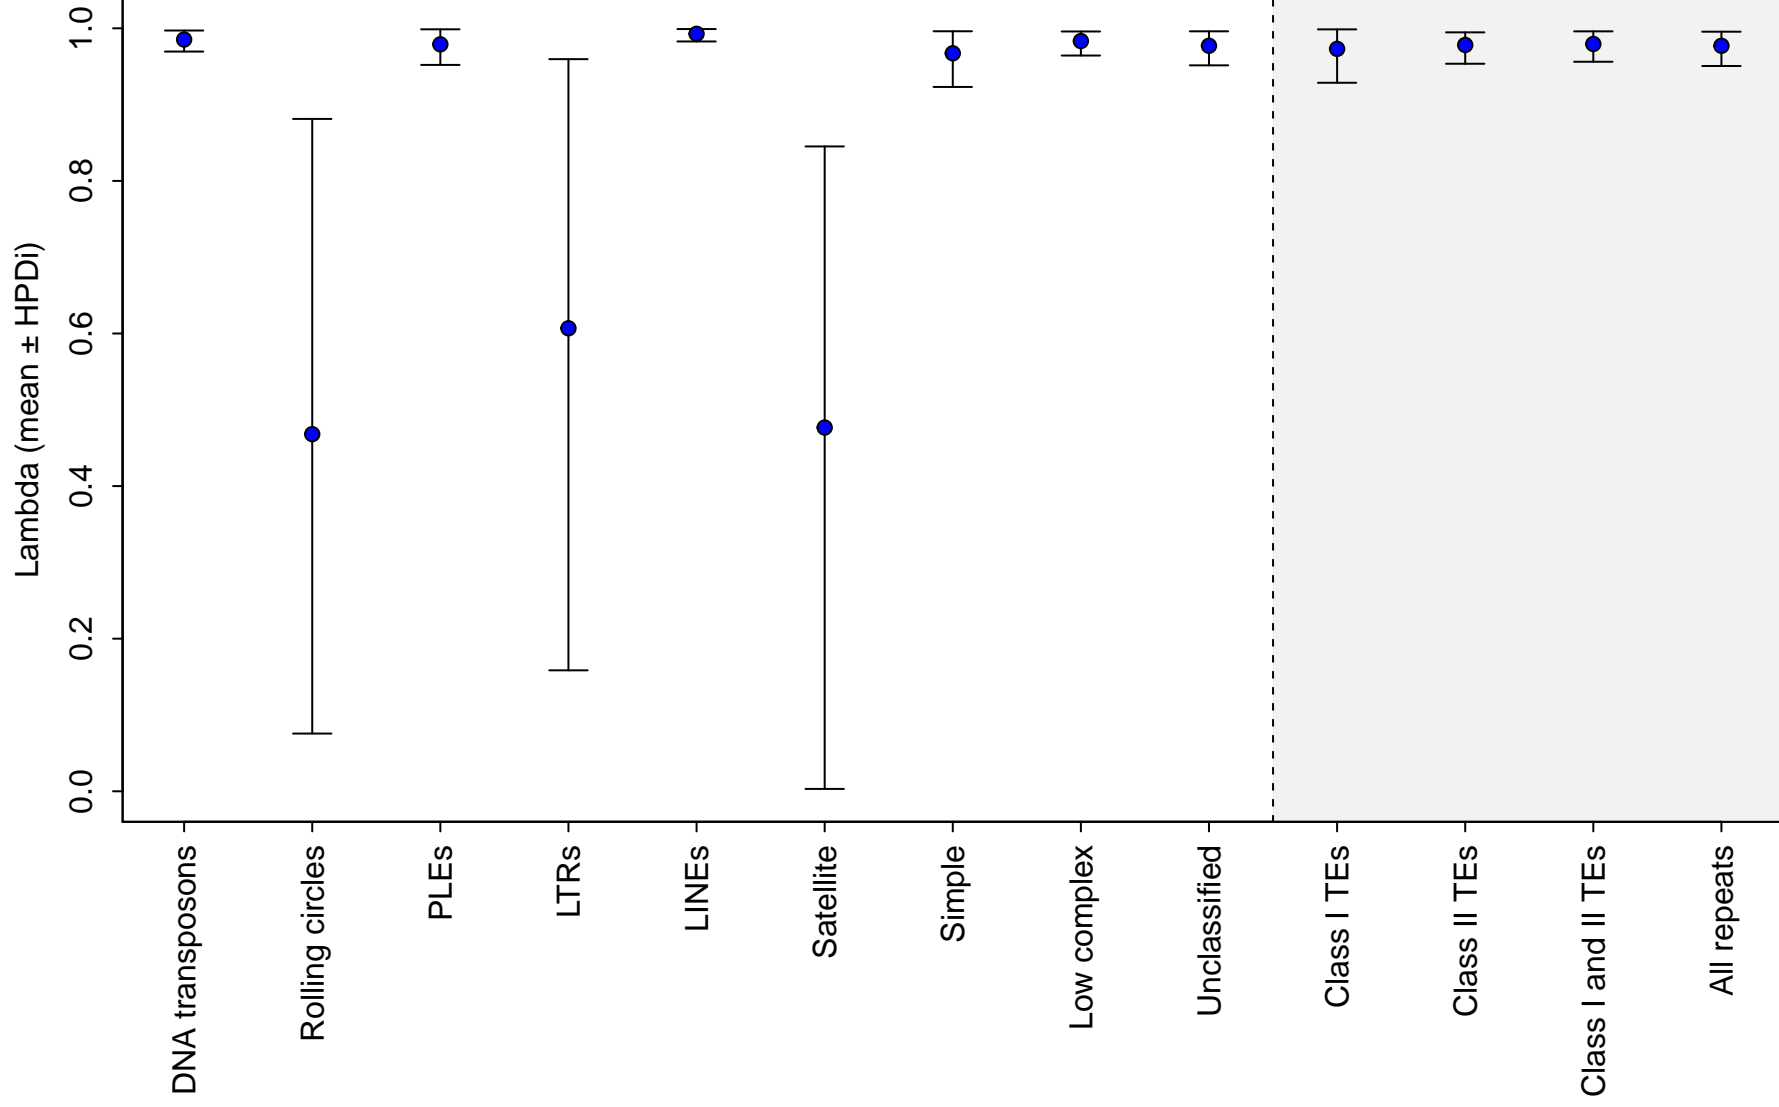

Supplement: supp [file elife-63194-supp-v1.zip]

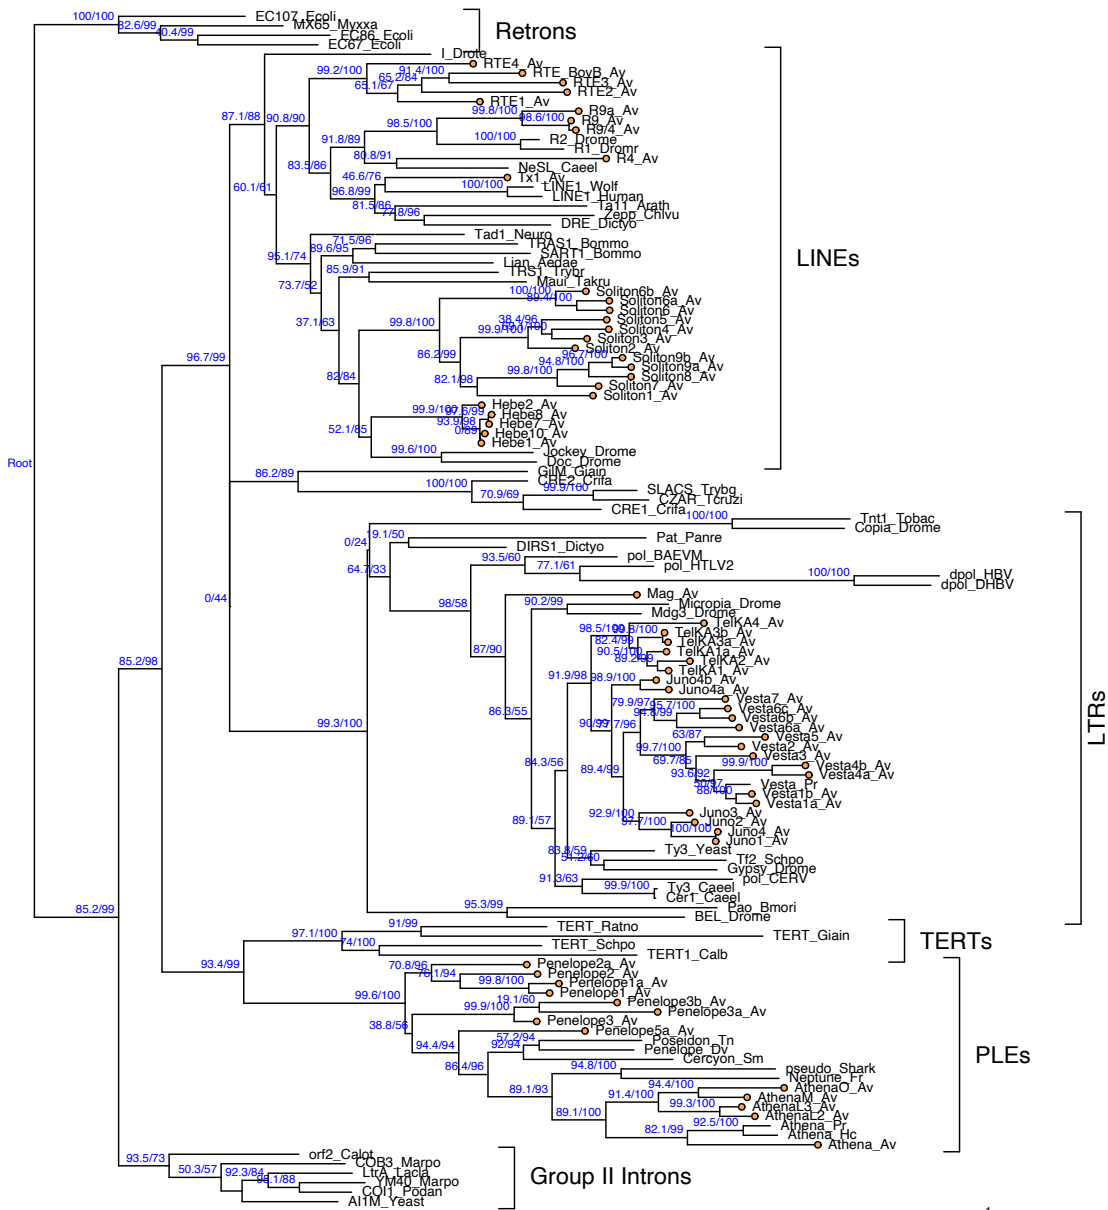

Supplement: supp [file elife-63194-supp-v1.zip]

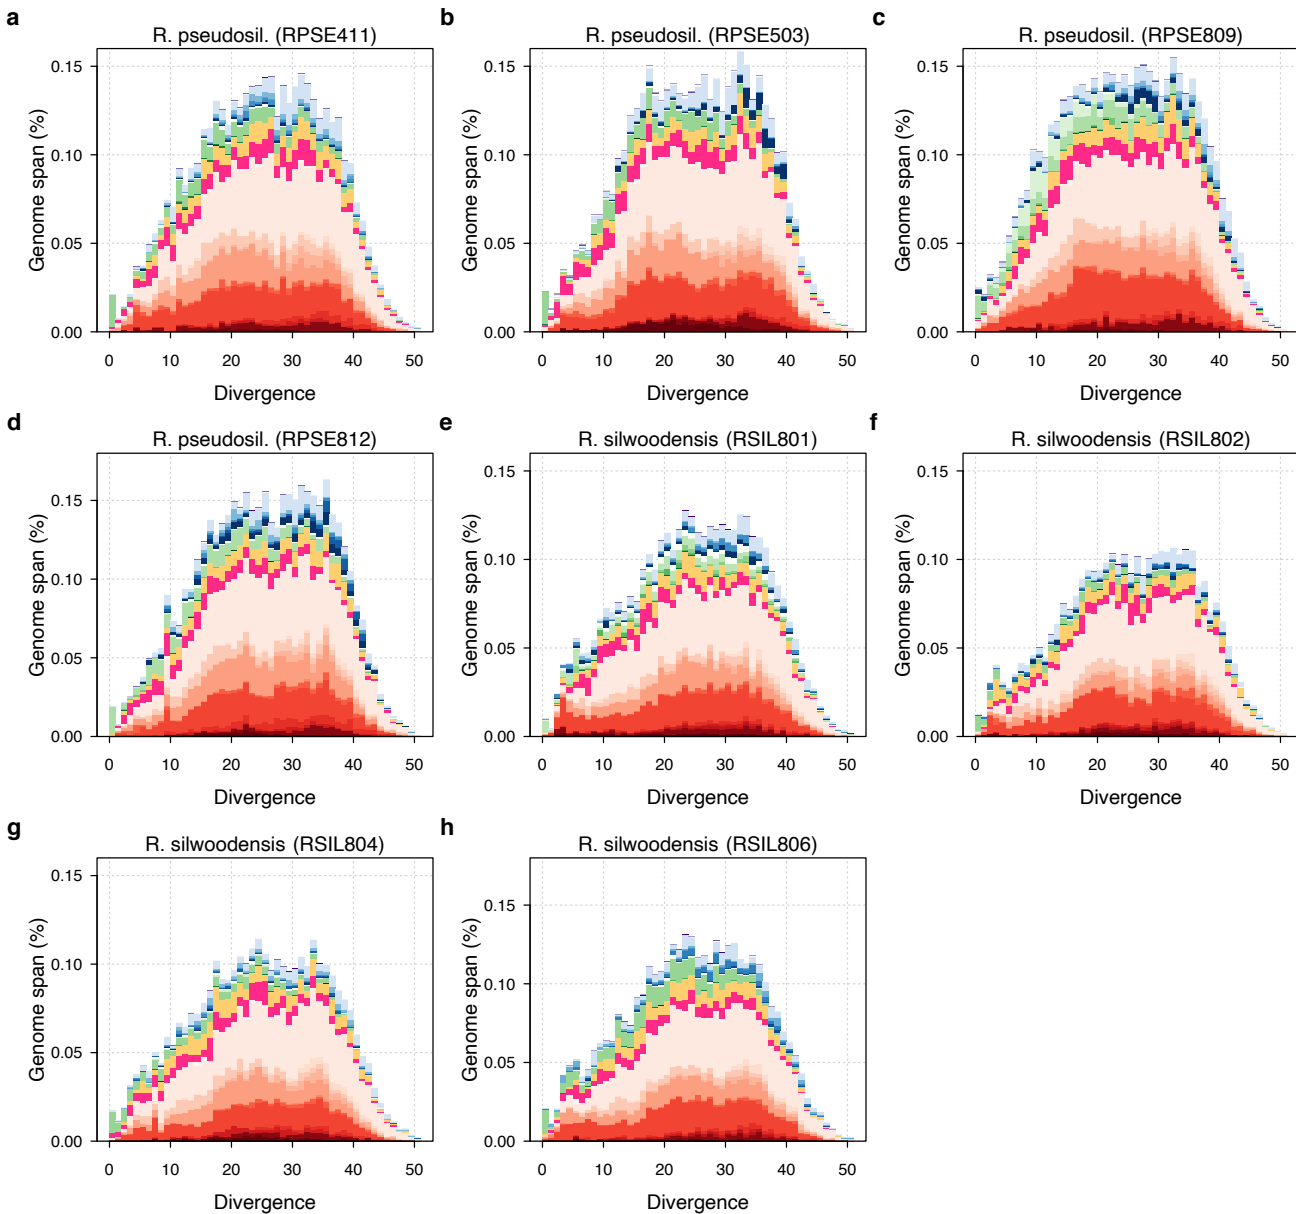

Supplement: supp [file elife-63194-supp-v1.zip]

**A**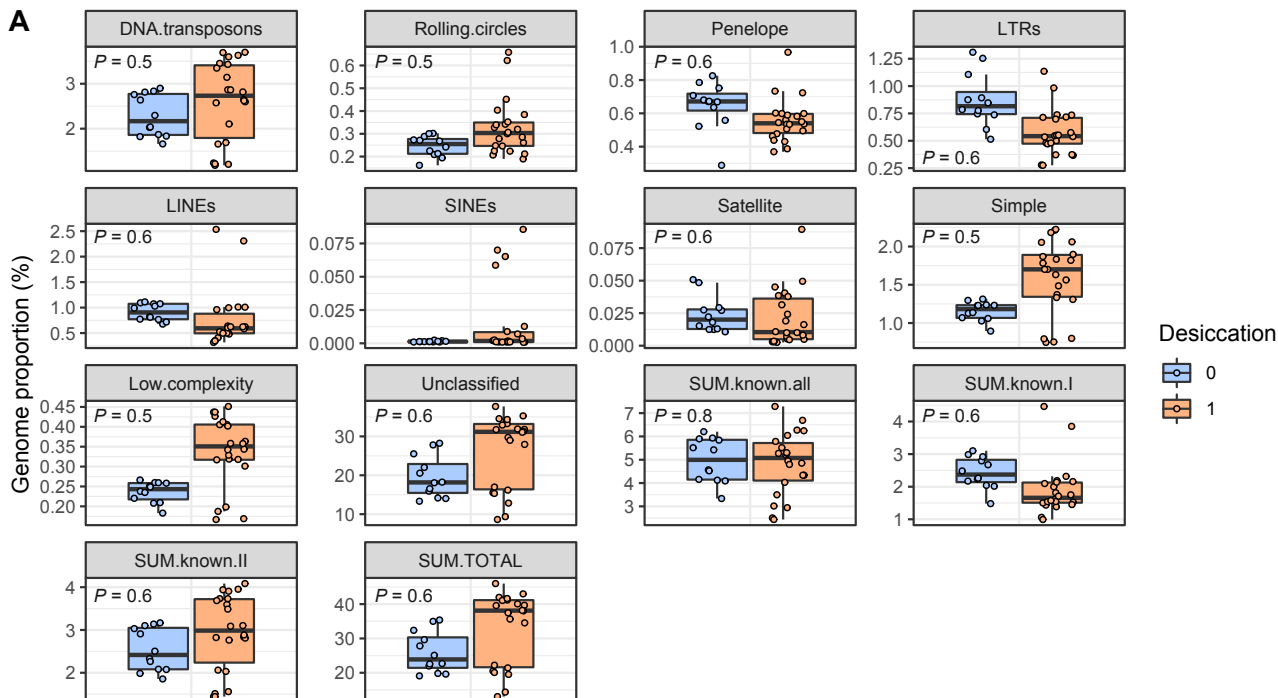**B**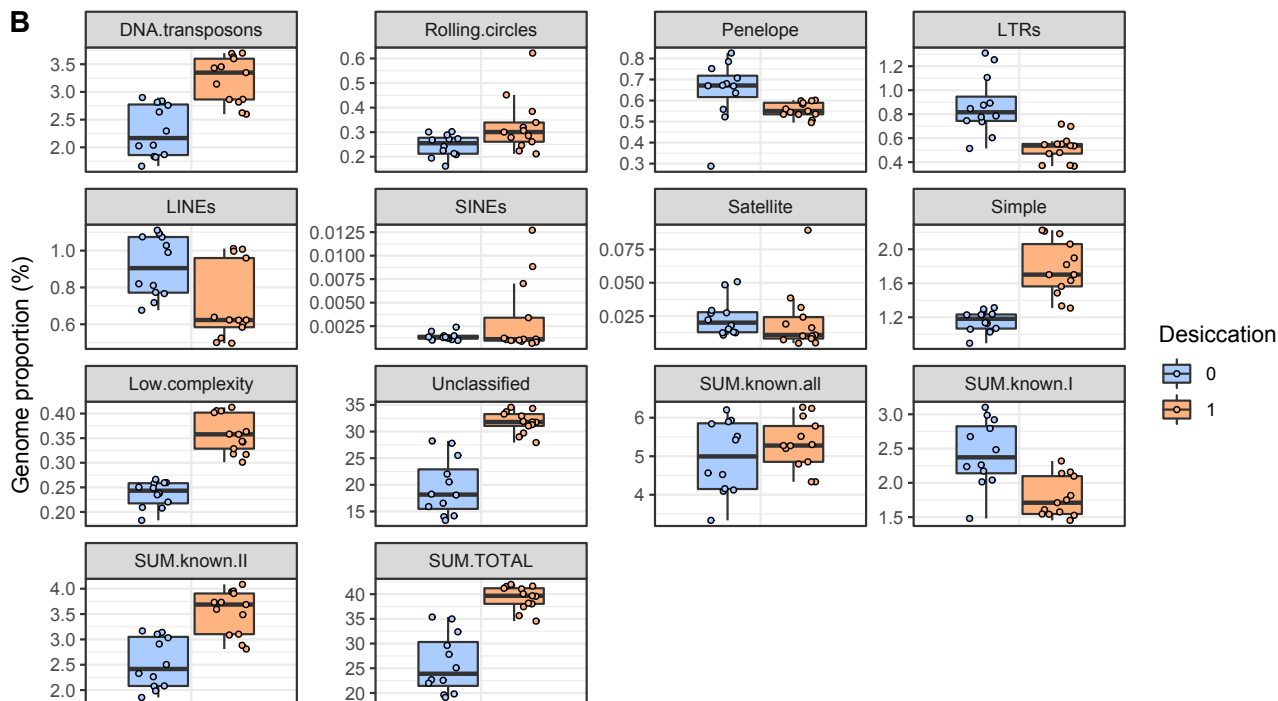

Supplement: supp [file elife-63194-supp-v1.zip]

**a**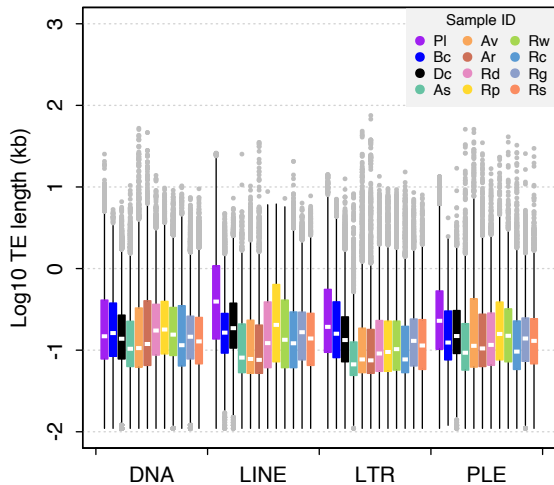**b**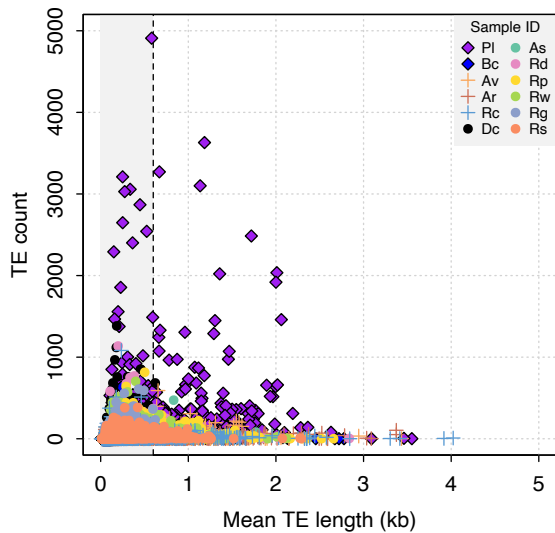

Supplement: supp [file elife-63194-supp-v1.zip]

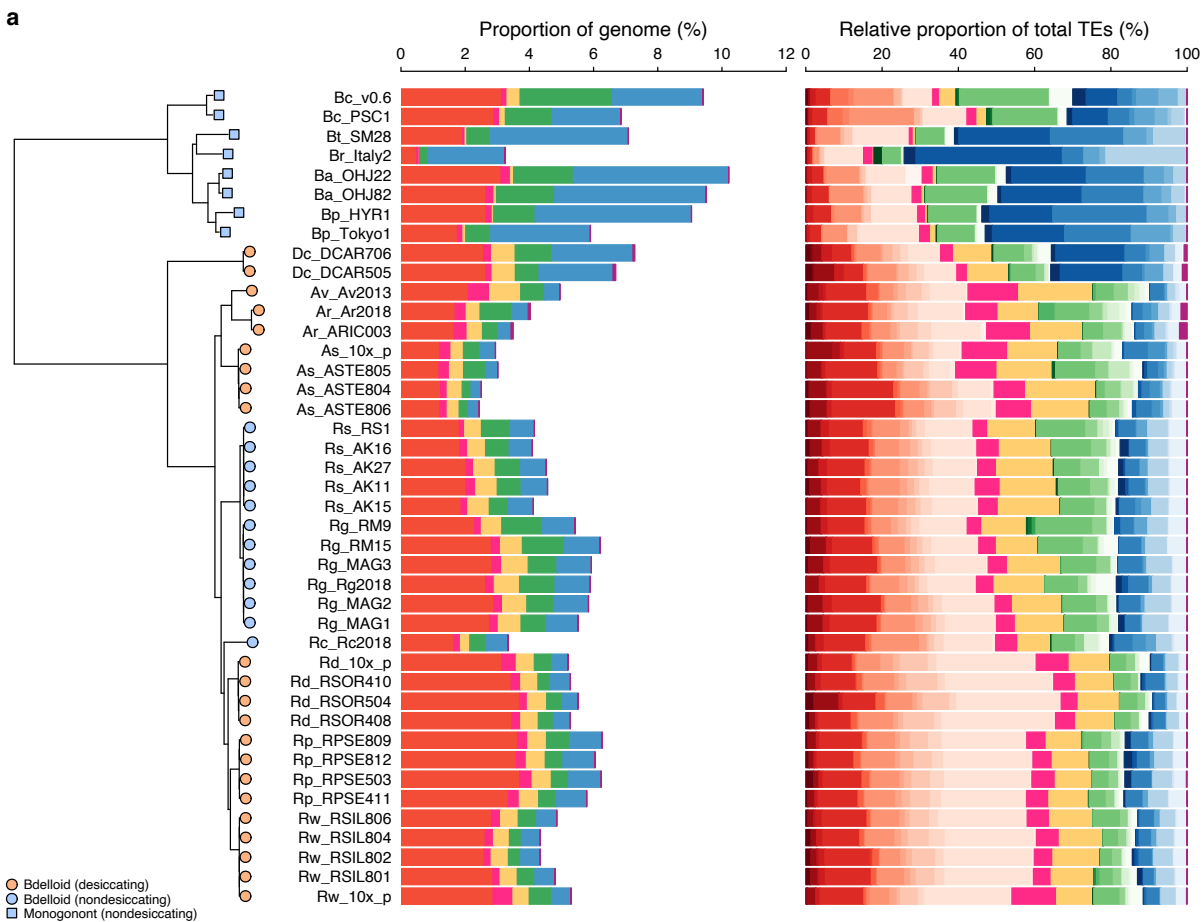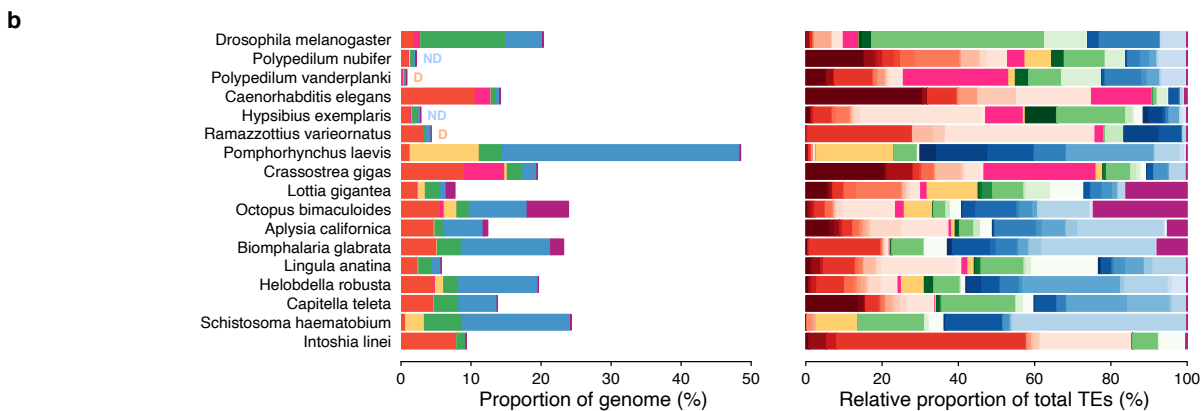

Supplement: supp [file elife-63194-supp-v1.zip › elife_poa_e63194_Figure_2_figure_supplement_1.pdf]

## A Class I

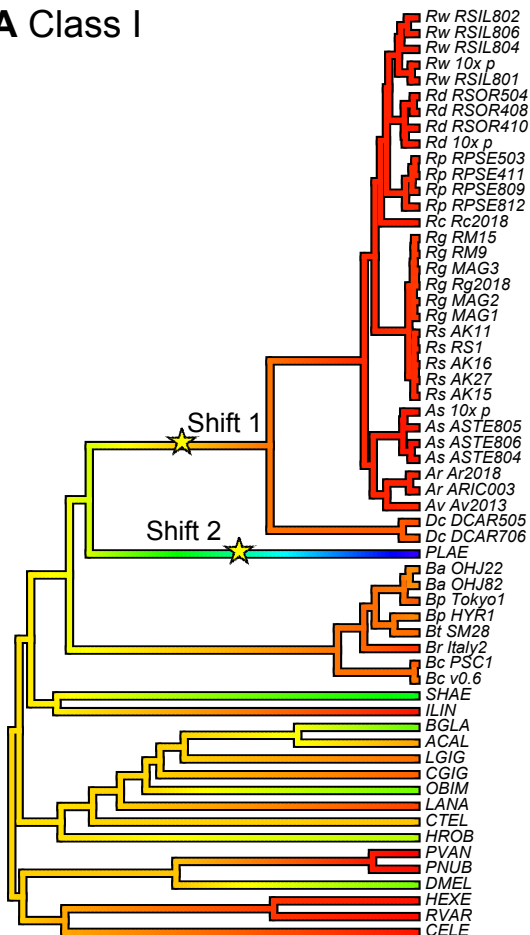

## B Class II

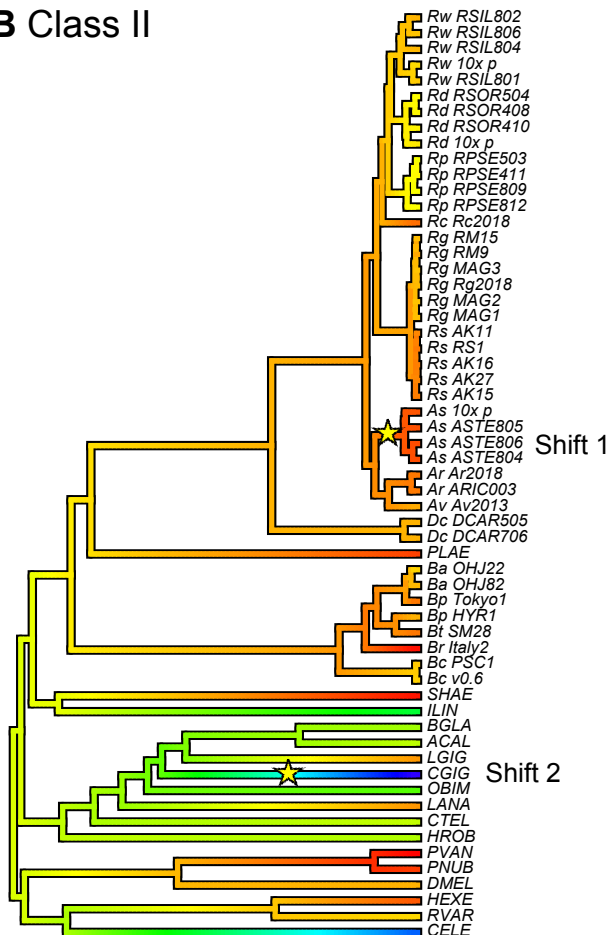

Frequency (%)

Frequency (%)

Supplement: supp [file elife-63194-supp-v1.zip › elife_poa_e63194_Figure_2_figure_supplement_3.pdf]

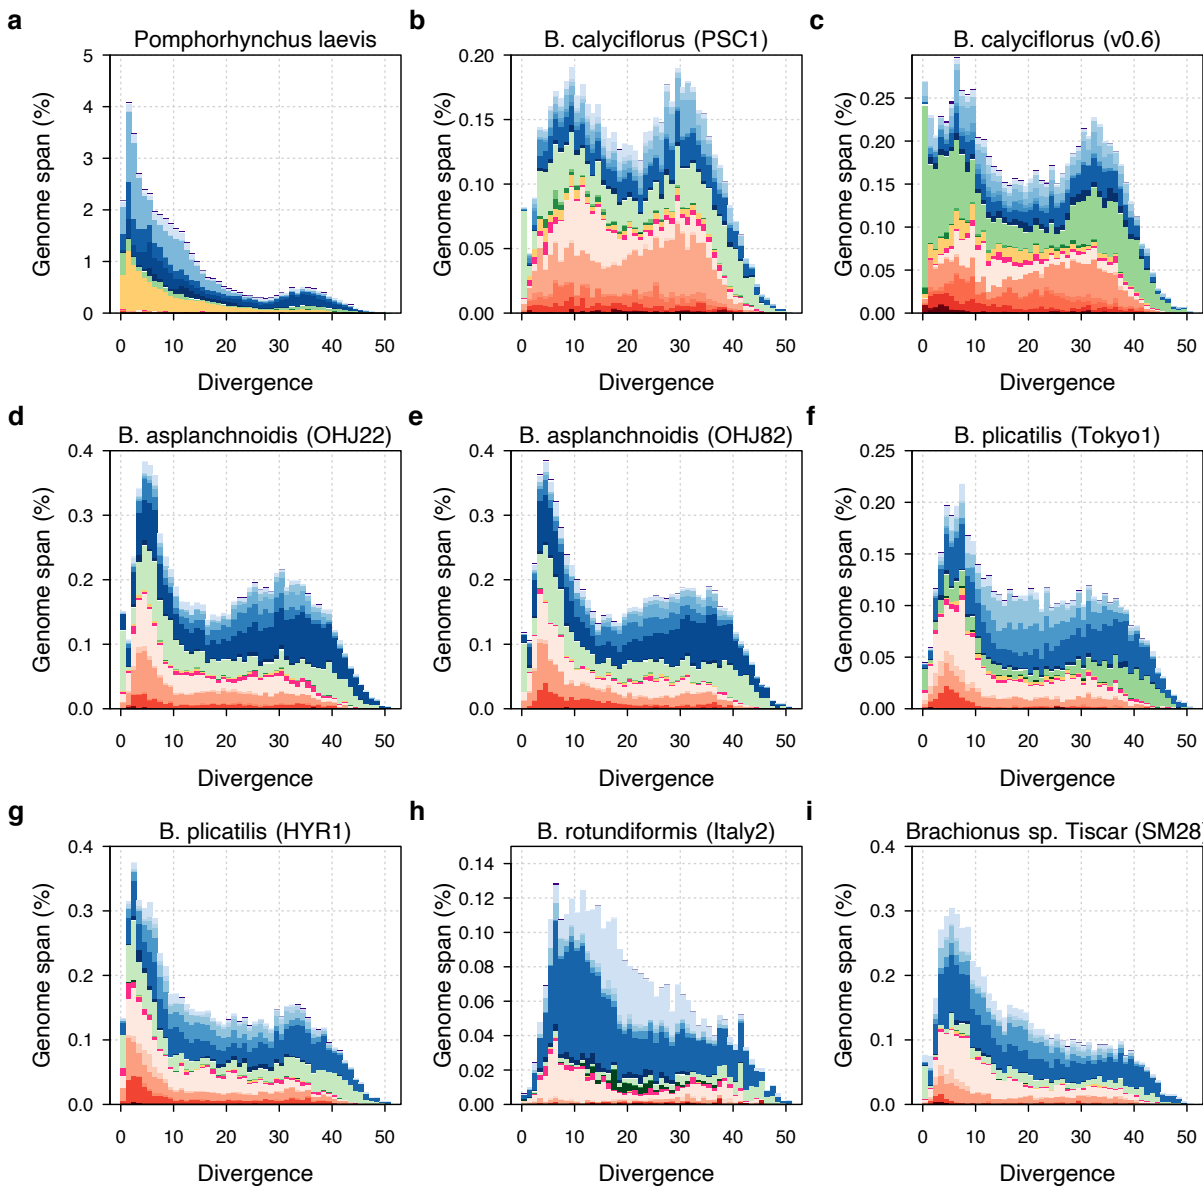

Supplement: supp [file elife-63194-supp-v1.zip › elife_poa_e63194_Figure_3_figure_supplement_1.pdf]

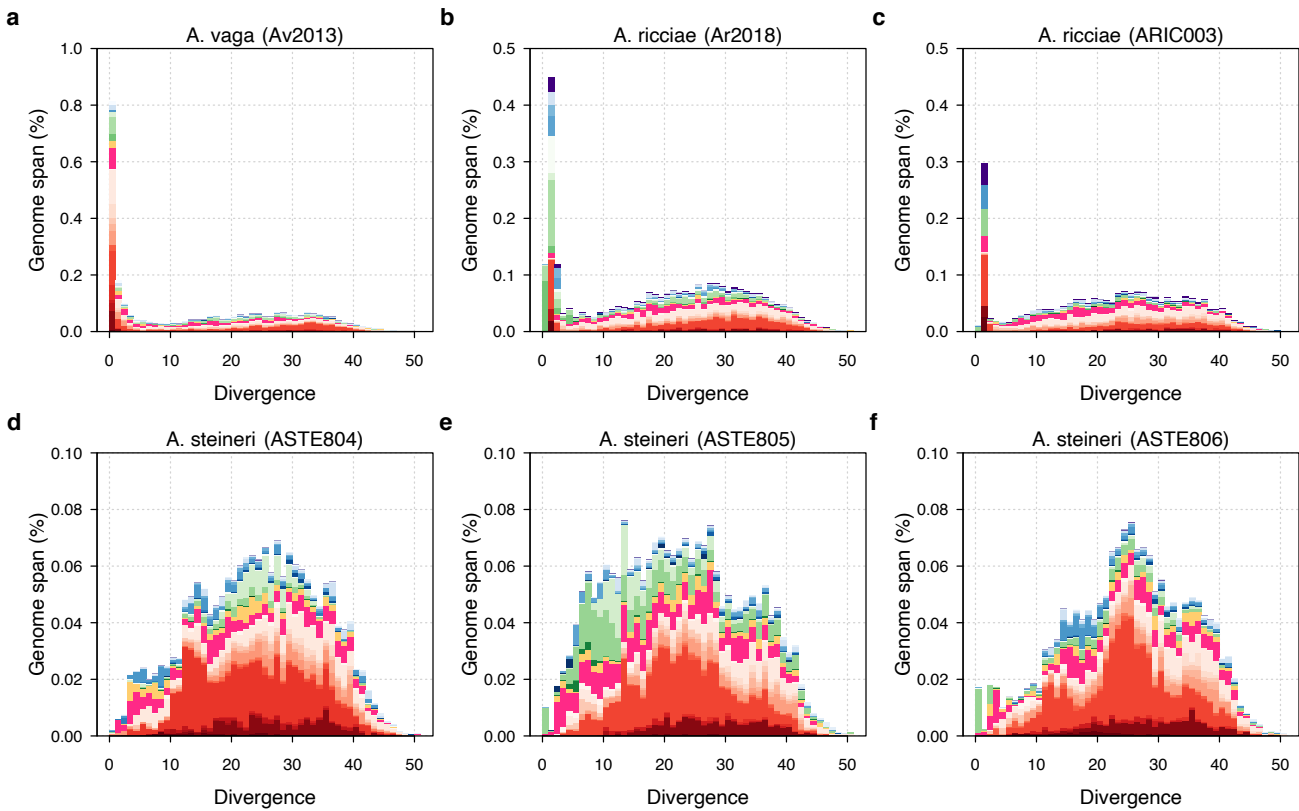

Supplement: supp [file elife-63194-supp-v1.zip › elife_poa_e63194_Figure_3_figure_supplement_2.pdf]

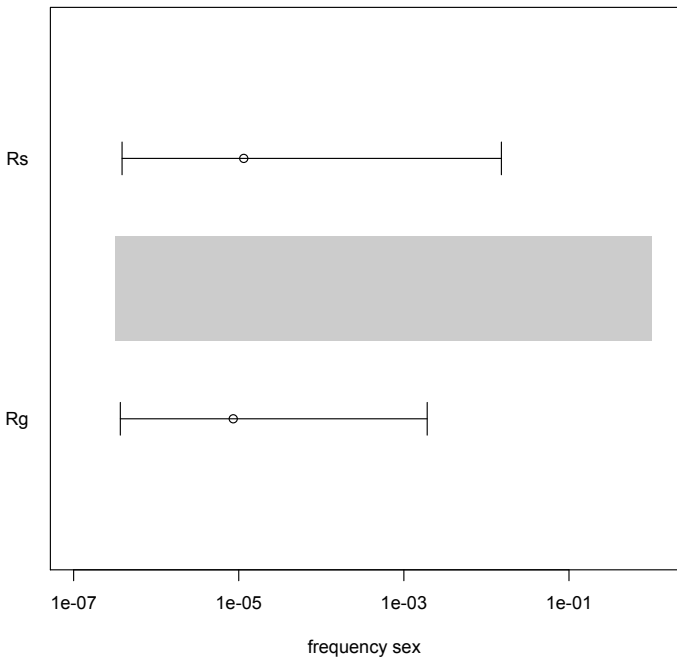

Supplement: supp [file elife-63194-supp-v1.zip › elife_poa_e63194_Figure_4_figure_supplement_2.pdf]
